# Supplementary material for: Integrative analysis of transcriptome complexity in pig granulosa cells by long-read isoform sequencing
Source: PeerJ. 2022 May 25;10:e13446. doi: 10.7717/peerj.13446 (PMC9147391; doi:10.7717/peerj.13446)
Supplement: Supplemental Information 2 [file peerj-10-13446-s002.xlsx]

## Sheet: Sheet1
isoform	chrom	strand	length	exons	structural_category	associated_gene	associated_transcript	ref_length	ref_exons	diff_to_TSS	diff_to_TTS	diff_to_gene_TSS	diff_to_gene_TTS	subcategory	RTS_stage	all_canonical	min_sample_cov	min_cov	min_cov_pos	sd_cov	FL	n_indels	n_indels_junc	bite	iso_exp	gene_exp	ratio_exp	FSM_class	coding	ORF_length	CDS_length	CDS_start	CDS_end	CDS_genomic_start	CDS_genomic_end	predicted_NMD	perc_A_downstream_TTS	seq_A_downstream_TTS	dist_to_cage_peak	within_cage_peak	dist_to_polya_site	within_polya_site	polyA_motif	polyA_dist_x000D_
PB.7517.1	LUXX01000020.1	-	2573	10	novel_in_catalog	ENSSSCG00025000004	novel	2504	12	NA	NA	-1	0	intron_retention	FALSE	canonical	NA	NA	NA	NA	NA	NA	NA	TRUE	NA	NA	NA	B	coding	196	591	84	674	11842	9338	TRUE	25	ACCCAGATCTTTAGTTTTAT	NA	NA	NA	NA	AATAAA	-18_x000D_
PB.7517.4	LUXX01000020.1	-	2303	11	novel_in_catalog	ENSSSCG00025000004	novel	2504	12	NA	NA	-1	-1	intron_retention	FALSE	canonical	NA	NA	NA	NA	NA	NA	NA	TRUE	NA	NA	NA	B	coding	447	1344	84	1427	11842	6985	FALSE	25	GACCCAGATCTTTAGTTTTA	NA	NA	NA	NA	AATAAA	-17_x000D_
PB.7518.1	LUXX01000020.1	-	2001	10	novel_not_in_catalog	ENSSSCG00025000005	novel	2111	10	NA	NA	39	-1	intron_retention	TRUE	non_canonical	NA	NA	NA	NA	NA	NA	NA	TRUE	NA	NA	NA	C	coding	281	846	534	1379	16090	13220	FALSE	10	CTTGGGCCTCTTGTCACTCA	NA	NA	NA	NA	AATAAA	-20_x000D_
PB.7518.3	LUXX01000020.1	-	2052	10	full-splice_match	ENSSSCG00025000005	ENSSSCT00025000011	2111	10	57	2	24	-2	multi-exon	FALSE	canonical	NA	NA	NA	NA	NA	NA	NA	TRUE	NA	NA	NA	C	coding	469	1410	22	1431	20361	13220	FALSE	5	GCTTGGGCCTCTTGTCACTC	NA	NA	NA	NA	AATAAA	-19_x000D_
PB.7519.1	LUXX01000020.1	-	1991	10	full-splice_match	ENSSSCG00025000007	ENSSSCT00025000016	2025	10	37	-3	37	3	multi-exon	TRUE	canonical	NA	NA	NA	NA	NA	NA	NA	TRUE	NA	NA	NA	A	coding	262	789	315	1103	32557	27553	FALSE	5	CTTCTGGCCTCTCTGTAGGG	NA	NA	NA	NA	AATAAA	-23_x000D_
PB.7520.1	LUXX01000020.1	+	1256	8	incomplete-splice_match	ENSSSCG00025000008	ENSSSCT00025000017	1368	10	2364	0	2364	0	5prime_fragment	FALSE	canonical	NA	NA	NA	NA	NA	NA	NA	TRUE	NA	NA	NA	A	coding	265	798	369	1166	38562	41445	FALSE	5	TACGCGCCTTTGCCTTGTGT	NA	NA	NA	NA	NA	NA_x000D_
PB.7521.2	LUXX01000020.1	-	744	7	full-splice_match	ENSSSCG00025000009	ENSSSCT00025000018	1227	7	477	6	-123	0	multi-exon	FALSE	canonical	NA	NA	NA	NA	NA	NA	NA	TRUE	NA	NA	NA	A	coding	214	645	42	686	45486	43148	FALSE	10	CCTCTGTCTTTGCATCTGGA	NA	NA	NA	NA	AATAAA	-16_x000D_
PB.7486.1	LUXX01000021.1	-	1101	5	full-splice_match	ENSSSCG00025000011	ENSSSCT00025000024	1227	5	125	1	125	-1	multi-exon	FALSE	canonical	NA	NA	NA	NA	NA	NA	NA	TRUE	NA	NA	NA	A	coding	172	519	62	580	6378	3244	FALSE	20	AGCTCTTGTTCTCTAAGGAT	NA	NA	NA	NA	AATAAA	-16_x000D_
PB.7487.1	LUXX01000021.1	+	1322	8	novel_in_catalog	ENSSSCG00025000012	novel	6838	10	NA	NA	-16	4	combination_of_known_splicesites	FALSE	canonical	NA	NA	NA	NA	NA	NA	NA	TRUE	NA	NA	NA	B	coding	361	1086	151	1236	11232	21644	FALSE	15	AGCTGCTTCTGAGCGTAGGT	NA	NA	NA	NA	AATAAA	-18_x000D_
PB.7487.2	LUXX01000021.1	+	1928	8	novel_in_catalog	ENSSSCG00025000012	novel	6838	10	NA	NA	-18	645	combination_of_known_splicesites	FALSE	canonical	NA	NA	NA	NA	NA	NA	NA	TRUE	NA	NA	NA	B	coding	361	1086	116	1201	11232	21644	FALSE	15	TGAGCAGTTTGTGGGATGTG	NA	NA	NA	NA	AATAAA	-20_x000D_
PB.7488.1	LUXX01000021.1	+	2942	8	novel_not_in_catalog	ENSSSCG00025000016	novel	4592	25	NA	NA	21558	128	at_least_one_novel_splicesite	TRUE	canonical	NA	NA	NA	NA	NA	NA	NA	TRUE	NA	NA	NA	A	coding	152	459	366	824	81020	86593	FALSE	35	AGATCTGTATCACAACATTG	NA	NA	NA	NA	AATAAA	-15_x000D_
PB.4164.1	LUXX01000066.1	+	4250	10	novel_in_catalog	ENSSSCG00025000053	novel	4334	10	NA	NA	0	-1	combination_of_known_junctions	TRUE	canonical	NA	NA	NA	NA	NA	NA	NA	TRUE	NA	NA	NA	B	coding	399	1200	57	1256	901614	935964	FALSE	15	ATTGTCACATGCTTCTTGTT	NA	NA	NA	NA	AATAAA	-18_x000D_
PB.4164.2	LUXX01000066.1	+	1312	10	novel_in_catalog	ENSSSCG00025000053	novel	4334	10	NA	NA	-18	-2918	combination_of_known_junctions	FALSE	canonical	NA	NA	NA	NA	NA	NA	NA	TRUE	NA	NA	NA	B	coding	400	1203	33	1235	901611	935964	FALSE	30	AAACTATGTGCTTGATTTAG	NA	NA	NA	NA	ATTAAA	-15_x000D_
PB.4165.1	LUXX01000066.1	+	1895	11	incomplete-splice_match	ENSSSCG00025000061	ENSSSCT00025000094	2574	12	5	2128	5	-2128	3prime_fragment	FALSE	canonical	NA	NA	NA	NA	NA	NA	NA	TRUE	NA	NA	NA	A	coding	430	1293	193	1485	1080633	1113978	FALSE	35	AAAATAACTTTAGTTTTCTT	NA	NA	NA	NA	AATAAA	-16_x000D_
PB.4166.1	LUXX01000066.1	-	3999	6	full-splice_match	ENSSSCG00025000067	ENSSSCT00025000100	7097	6	0	3098	0	-3098	multi-exon	FALSE	canonical	NA	NA	NA	NA	NA	NA	NA	TRUE	NA	NA	NA	C	coding	228	687	67	753	1328329	1312173	FALSE	45	AAAATGGAATGTACTGAGGA	NA	NA	NA	NA	CATAAA	-18_x000D_
PB.4166.2	LUXX01000066.1	-	3112	6	full-splice_match	ENSSSCG00025000067	ENSSSCT00025000100	7097	6	31	3954	31	2390	multi-exon	FALSE	canonical	NA	NA	NA	NA	NA	NA	NA	TRUE	NA	NA	NA	C	coding	228	687	36	722	1328329	1312173	FALSE	45	TATAGAAATTTCCGTAAATA	NA	NA	NA	NA	AATAAA	-20_x000D_
PB.2830.1	LUXX01000306.1	-	3145	21	novel_in_catalog	ENSSSCG00025004176	novel	3242	22	NA	NA	0	0	combination_of_known_junctions	FALSE	canonical	NA	NA	NA	NA	NA	NA	NA	TRUE	NA	NA	NA	B	coding	883	2652	151	2802	351502	37997	FALSE	10	AAGTGCCGTCTGGTGTGTGG	NA	NA	NA	NA	AATAAA	-11_x000D_
PB.2830.2	LUXX01000306.1	-	3116	21	novel_not_in_catalog	ENSSSCG00025004176	novel	3242	22	NA	NA	-2	-1	at_least_one_novel_splicesite	FALSE	canonical	NA	NA	NA	NA	NA	NA	NA	TRUE	NA	NA	NA	B	coding	873	2622	153	2774	351502	37997	FALSE	10	GAAGTGCCGTCTGGTGTGTG	NA	NA	NA	NA	AATAAA	-10_x000D_
PB.2830.3	LUXX01000306.1	-	4802	12	incomplete-splice_match	ENSSSCG00025004176	ENSSSCT00025005708	3019	20	-51	91979	-18	-91979	3prime_fragment	FALSE	canonical	NA	NA	NA	NA	NA	NA	NA	TRUE	NA	NA	NA	B	coding	486	1461	180	1640	351502	132797	FALSE	85	AAAAAGACCAAAAAAAAAAA	NA	NA	NA	NA	NA	NA_x000D_
PB.2831.1	LUXX01000306.1	-	1991	7	novel_in_catalog	ENSSSCG00025000449	novel	2684	11	NA	NA	0	3	intron_retention	FALSE	canonical	NA	NA	NA	NA	NA	NA	NA	TRUE	NA	NA	NA	A	coding	264	795	111	905	503906	488443	FALSE	15	CCCCTTGTGTCAATATTTGT	NA	NA	NA	NA	AATACA	-20_x000D_
PB.2832.1	LUXX01000306.1	+	1140	5	incomplete-splice_match	ENSSSCG00025000636	ENSSSCT00025000771	1040	6	-4	-6	-4	6	intron_retention	FALSE	canonical	NA	NA	NA	NA	NA	NA	NA	TRUE	NA	NA	NA	A	coding	150	453	173	625	511802	561314	FALSE	5	GCCTTGCTTTCATCTCTCCT	NA	NA	NA	NA	ATTAAA	-37_x000D_
PB.2833.2	LUXX01000306.1	-	1232	5	novel_in_catalog	ENSSSCG00025000786	novel	1462	7	NA	NA	767	1	intron_retention	FALSE	canonical	NA	NA	NA	NA	NA	NA	NA	TRUE	NA	NA	NA	B	coding	110	333	179	511	581034	576915	FALSE	35	AACAAAGCTGTCTCAAGCCT	NA	NA	NA	NA	AATAAA	-29_x000D_
PB.2833.3	LUXX01000306.1	-	973	5	novel_in_catalog	ENSSSCG00025000786	novel	1462	7	NA	NA	767	-258	intron_retention	FALSE	canonical	NA	NA	NA	NA	NA	NA	NA	TRUE	NA	NA	NA	B	coding	110	333	179	511	581034	576915	FALSE	75	AAAAAAAGCAAAAACCACAA	NA	NA	NA	NA	NA	NA_x000D_
PB.2833.5	LUXX01000306.1	-	541	5	incomplete-splice_match	ENSSSCG00025000786	ENSSSCT00025001004	1021	8	764	693	764	-693	internal_fragment	FALSE	canonical	NA	NA	NA	NA	NA	NA	NA	TRUE	NA	NA	NA	B	coding	110	333	182	514	581034	576915	FALSE	90	AACAGAAAAAAAAAAAAAAA	NA	NA	NA	NA	AAAAAG	-16_x000D_
PB.2834.1	LUXX01000306.1	+	800	4	incomplete-splice_match	ENSSSCG00025001309	ENSSSCT00025001692	2769	14	46	7079	46	-7079	3prime_fragment	FALSE	canonical	NA	NA	NA	NA	NA	NA	NA	TRUE	NA	NA	NA	C	coding	203	609	192	800	762142	764335	FALSE	45	AAAGGGAAAAAAGCCCCGGC	NA	NA	NA	NA	NA	NA_x000D_
PB.2834.2	LUXX01000306.1	+	2713	14	full-splice_match	ENSSSCG00025001309	ENSSSCT00025001692	2769	14	56	0	56	0	multi-exon	FALSE	canonical	NA	NA	NA	NA	NA	NA	NA	TRUE	NA	NA	NA	C	coding	724	2175	134	2308	760841	771009	FALSE	15	GTGCCAGACTTGTACTTCCT	NA	NA	NA	NA	ATTAAA	-15_x000D_
PB.2834.3	LUXX01000306.1	+	2527	14	full-splice_match	ENSSSCG00025001309	ENSSSCT00025001692	2769	14	58	184	58	-184	multi-exon	FALSE	canonical	NA	NA	NA	NA	NA	NA	NA	TRUE	NA	NA	NA	C	coding	724	2175	132	2306	760841	771009	FALSE	25	TAACCCTTATCTGTAAGTTT	NA	NA	NA	NA	TATAAA	-27_x000D_
PB.2835.1	LUXX01000306.1	-	3357	24	novel_not_in_catalog	ENSSSCG00025001560	novel	3433	26	NA	NA	-22	4	at_least_one_novel_splicesite	TRUE	canonical	NA	NA	NA	NA	NA	NA	NA	TRUE	NA	NA	NA	B	coding	540	1623	937	2559	960454	834892	FALSE	5	ATGGTTTTGTGTGTGTGTGT	NA	NA	NA	NA	AATAAA	-16_x000D_
PB.2835.2	LUXX01000306.1	-	2186	20	novel_not_in_catalog	ENSSSCG00025001560	novel	3433	26	NA	NA	-1	-19978	at_least_one_novel_splicesite	FALSE	canonical	NA	NA	NA	NA	NA	NA	NA	TRUE	NA	NA	NA	B	coding	388	1167	916	2082	960454	854180	FALSE	35	AAAAGCACTTATCTCTTTAT	NA	NA	NA	NA	AATAAA	-13_x000D_
PB.2836.1	LUXX01000306.1	-	3210	25	full-splice_match	ENSSSCG00025001766	ENSSSCT00025002279	3879	25	-9	678	-9	-3	multi-exon	TRUE	canonical	NA	NA	NA	NA	NA	NA	NA	TRUE	NA	NA	NA	C	coding	953	2862	136	2997	1123657	1022227	TRUE	25	AGATGGACCAGGACTTGTTT	NA	NA	NA	NA	AATAAA	-16_x000D_
PB.2836.2	LUXX01000306.1	-	1147	9	novel_in_catalog	ENSSSCG00025001766	novel	5173	23	NA	NA	28372	-3	combination_of_known_splicesites	FALSE	canonical	NA	NA	NA	NA	NA	NA	NA	TRUE	NA	NA	NA	C	coding	302	909	26	934	1095187	1022227	TRUE	25	AGATGGACCAGGACTTGTTT	NA	NA	NA	NA	AATAAA	-16_x000D_
PB.2836.3	LUXX01000306.1	-	2704	22	incomplete-splice_match	ENSSSCG00025001766	ENSSSCT00025002279	3879	25	-9	16740	-9	-16065	3prime_fragment	FALSE	canonical	NA	NA	NA	NA	NA	NA	NA	TRUE	NA	NA	NA	C	coding	856	2568	136	2703	1123657	1036302	FALSE	30	TAGGTATAATTTAGTGGTCA	NA	NA	NA	NA	AAAAAG	-37_x000D_
PB.2836.4	LUXX01000306.1	-	2594	21	incomplete-splice_match	ENSSSCG00025001766	ENSSSCT00025002279	3879	25	-9	18966	-9	-18291	3prime_fragment	FALSE	canonical	NA	NA	NA	NA	NA	NA	NA	TRUE	NA	NA	NA	C	coding	819	2457	136	2592	1123657	1038529	FALSE	80	AAAAGAAAAAGAAAAGGAAA	NA	NA	NA	NA	NA	NA_x000D_
PB.2837.1	LUXX01000306.1	-	2100	6	novel_not_in_catalog	ENSSSCG00025002282	novel	2146	6	NA	NA	48	0	at_least_one_novel_splicesite	TRUE	canonical	NA	NA	NA	NA	NA	NA	NA	TRUE	NA	NA	NA	A	coding	269	810	100	909	1315736	1303206	FALSE	20	ACTCTGACTTGGGAATGGTG	NA	NA	NA	NA	AATAAA	-16_x000D_
PB.2838.1	LUXX01000306.1	+	2265	1	intergenic	novelGene_229	novel	NA	NA	NA	NA	NA	NA	mono-exon	FALSE	NA	NA	NA	NA	NA	NA	NA	NA	NA	NA	NA	NA	A	non_coding	NA	NA	NA	NA	NA	NA	NA	90	AAAAAGACAAAAAAAAAAAA	NA	NA	NA	NA	NA	NA_x000D_
PB.2839.1	LUXX01000306.1	-	3030	25	antisense	novelGene_ENSSSCG00025004116_AS	novel	NA	NA	NA	NA	NA	NA	multi-exon	FALSE	canonical	NA	NA	NA	NA	NA	NA	NA	FALSE	NA	NA	NA	B	coding	752	2259	423	2681	1700422	1638853	FALSE	30	ATCTCAGTCTCTAAGATTAT	NA	NA	NA	NA	AATAAA	-17_x000D_
PB.2839.2	LUXX01000306.1	-	1540	13	antisense	novelGene_ENSSSCG00025004116_AS	novel	NA	NA	NA	NA	NA	NA	multi-exon	FALSE	canonical	NA	NA	NA	NA	NA	NA	NA	FALSE	NA	NA	NA	B	coding	373	1119	422	1540	1700422	1667709	FALSE	55	AAAAGAAGTAAGAGTTCAGA	NA	NA	NA	NA	NA	NA_x000D_
PB.2840.1	LUXX01000306.1	+	2566	17	incomplete-splice_match	ENSSSCG00025004488	ENSSSCT00025006053	6853	42	170	37728	8	-37723	3prime_fragment	FALSE	canonical	NA	NA	NA	NA	NA	NA	NA	TRUE	NA	NA	NA	B	coding	787	2361	204	2564	2039406	2109154	FALSE	40	AAAAGAAGGCATTTTTGCAG	NA	NA	NA	NA	ATTAAA	-45_x000D_
PB.2840.2	LUXX01000306.1	+	6482	42	novel_in_catalog	ENSSSCG00025004488	novel	6767	44	NA	NA	-15	-55	intron_retention	FALSE	canonical	NA	NA	NA	NA	NA	NA	NA	TRUE	NA	NA	NA	B	coding	1998	5997	195	6191	2039406	2146533	FALSE	75	AAAAAAAAAAAAAAGGATGT	NA	NA	NA	NA	NA	NA_x000D_
PB.2840.3	LUXX01000306.1	+	6721	42	novel_in_catalog	ENSSSCG00025004488	novel	6869	43	NA	NA	2	0	intron_retention	FALSE	canonical	NA	NA	NA	NA	NA	NA	NA	TRUE	NA	NA	NA	B	coding	2069	6210	164	6373	2039406	2146533	FALSE	15	TAATCCTGGGCTGTGTGTAT	NA	NA	NA	NA	AATAAA	-16_x000D_
PB.2840.4	LUXX01000306.1	+	6571	41	novel_in_catalog	ENSSSCG00025004488	novel	6729	42	NA	NA	24	0	intron_retention	FALSE	canonical	NA	NA	NA	NA	NA	NA	NA	TRUE	NA	NA	NA	B	coding	2026	6081	142	6222	2039406	2146533	FALSE	15	AATCCTGGGCTGTGTGTATC	NA	NA	NA	NA	AATAAA	-17_x000D_
PB.2840.5	LUXX01000306.1	+	5681	40	novel_not_in_catalog	ENSSSCG00025004488	novel	6729	42	NA	NA	3799	0	intron_retention	FALSE	non_canonical	NA	NA	NA	NA	NA	NA	NA	TRUE	NA	NA	NA	B	coding	1671	5016	317	5332	2080800	2146533	FALSE	15	AATCCTGGGCTGTGTGTATC	NA	NA	NA	NA	AATAAA	-17_x000D_
PB.2840.7	LUXX01000306.1	+	2950	19	incomplete-splice_match	ENSSSCG00025004488	ENSSSCT00025006138	6732	43	125753	-4	65877	0	5prime_fragment	FALSE	canonical	NA	NA	NA	NA	NA	NA	NA	TRUE	NA	NA	NA	B	coding	766	2301	300	2600	2123861	2146533	FALSE	10	ATCCTGGGCTGTGTGTATCC	NA	NA	NA	NA	AATAAA	-18_x000D_
PB.2841.1	LUXX01000306.1	-	2067	1	intergenic	novelGene_230	novel	NA	NA	NA	NA	NA	NA	mono-exon	FALSE	NA	NA	NA	NA	NA	NA	NA	NA	NA	NA	NA	NA	A	non_coding	NA	NA	NA	NA	NA	NA	NA	85	AAAAAAAAAAAAAAAAATCG	NA	NA	NA	NA	NA	NA_x000D_
PB.2842.1	LUXX01000306.1	+	2557	3	full-splice_match	ENSSSCG00025004643	ENSSSCT00025006256	6638	3	13	4068	13	2	multi-exon	FALSE	canonical	NA	NA	NA	NA	NA	NA	NA	TRUE	NA	NA	NA	A	coding	217	654	238	891	2603661	2854485	FALSE	35	AATAAAGCTGAGGTGTTTCA	NA	NA	NA	NA	AATAAA	-16_x000D_
PB.2843.1	LUXX01000306.1	-	2424	1	intergenic	novelGene_231	novel	NA	NA	NA	NA	NA	NA	mono-exon	FALSE	NA	NA	NA	NA	NA	NA	NA	NA	NA	NA	NA	NA	A	non_coding	NA	NA	NA	NA	NA	NA	NA	30	CCAGGAAGTCCACAATGTTG	NA	NA	NA	NA	NA	NA_x000D_
PB.5919.1	LUXX01000316.1	-	2536	1	genic	ENSSSCG00025000347	novel	NA	NA	NA	NA	12842	2117	mono-exon	FALSE	NA	NA	NA	NA	NA	NA	NA	NA	NA	NA	NA	NA	B	non_coding	NA	NA	NA	NA	NA	NA	NA	20	ATTTTTATTTATTTATTTTT	NA	NA	NA	NA	AATAAA	-22_x000D_
PB.5919.2	LUXX01000316.1	-	1391	1	intergenic	novelGene_474	novel	NA	NA	NA	NA	NA	NA	mono-exon	FALSE	NA	NA	NA	NA	NA	NA	NA	NA	NA	NA	NA	NA	A	non_coding	NA	NA	NA	NA	NA	NA	NA	20	TATTTTTATTTATTTATTTT	NA	NA	NA	NA	AATAAA	-21_x000D_
PB.5920.1	LUXX01000316.1	+	3002	1	intergenic	novelGene_475	novel	NA	NA	NA	NA	NA	NA	mono-exon	FALSE	NA	NA	NA	NA	NA	NA	NA	NA	NA	NA	NA	NA	A	non_coding	NA	NA	NA	NA	NA	NA	NA	100	AAAAAAAAAAAAAAAAAAAA	NA	NA	NA	NA	GATAAA	-33_x000D_
PB.5921.1	LUXX01000316.1	-	1971	1	novel_in_catalog	ENSSSCG00025000347	novel	969	3	NA	NA	862	-502	mono-exon	FALSE	NA	NA	NA	NA	NA	NA	NA	NA	NA	NA	NA	NA	B	coding	102	309	13	321	601685	601377	NA	85	CCCAAAAAAAAAAAAAAAAA	NA	NA	NA	NA	NA	NA_x000D_
PB.7132.1	LUXX01000318.1	-	2183	6	novel_in_catalog	ENSSSCG00025001113	novel	2141	5	NA	NA	142	-33	intron_retention	FALSE	canonical	NA	NA	NA	NA	NA	NA	NA	TRUE	NA	NA	NA	A	coding	243	732	197	928	195341	146589	FALSE	80	AAAAAGTAAAAAAATTAAAA	NA	NA	NA	NA	NA	NA_x000D_
PB.7133.1	LUXX01000318.1	-	3544	1	incomplete-splice_match	ENSSSCG00025001212	ENSSSCT00025001501	6612	7	50124	2244	49100	2088	mono-exon	FALSE	NA	NA	NA	NA	NA	NA	NA	NA	NA	NA	NA	NA	A	coding	102	309	376	684	223652	223344	NA	95	AAAAAAAAAAAAAAAAAAAT	NA	NA	NA	NA	NA	NA_x000D_
PB.6655.1	LUXX01000327.1	+	1864	3	novel_not_in_catalog	ENSSSCG00025001903	novel	3896	12	NA	NA	-840	-79375	at_least_one_novel_splicesite	FALSE	canonical	NA	NA	NA	NA	NA	NA	NA	TRUE	NA	NA	NA	A	coding	112	339	985	1323	261641	261979	FALSE	20	ACAGCGTTCGTTGTTTGTAA	NA	NA	NA	NA	AATATA	-28_x000D_
PB.6656.3	LUXX01000327.1	-	4454	23	novel_in_catalog	ENSSSCG00025002425	novel	4770	25	NA	NA	-9	0	combination_of_known_junctions	TRUE	canonical	NA	NA	NA	NA	NA	NA	NA	TRUE	NA	NA	NA	B	coding	915	2748	97	2844	389334	359281	FALSE	40	GACATTTCAAATGAGTCATA	NA	NA	NA	NA	AATAAA	-25_x000D_
PB.6656.4	LUXX01000327.1	-	3947	19	novel_in_catalog	ENSSSCG00025002425	novel	4066	20	NA	NA	-14	1	combination_of_known_splicesites	FALSE	canonical	NA	NA	NA	NA	NA	NA	NA	TRUE	NA	NA	NA	B	coding	757	2274	67	2340	389334	359281	FALSE	35	CATGACATTTCAAATGAGTC	NA	NA	NA	NA	AATAAA	-22_x000D_
PB.6657.1	LUXX01000327.1	+	2293	11	novel_in_catalog	ENSSSCG00025002983	novel	2315	11	NA	NA	28	1	combination_of_known_junctions	FALSE	canonical	NA	NA	NA	NA	NA	NA	NA	TRUE	NA	NA	NA	A	coding	381	1146	104	1249	473405	547047	FALSE	15	CAACTCCGGGTTTTGATCTG	NA	NA	NA	NA	ATTAAA	-22_x000D_
PB.6658.1	LUXX01000327.1	+	1597	6	full-splice_match	ENSSSCG00025003107	ENSSSCT00025004091	2503	6	-33	939	-33	-939	multi-exon	FALSE	canonical	NA	NA	NA	NA	NA	NA	NA	TRUE	NA	NA	NA	A	coding	196	591	236	826	569697	586018	FALSE	15	AAATGTTTCTGGCTTTCTGT	NA	NA	NA	NA	AATAAA	-31_x000D_
PB.7540.1	LUXX01000395.1	+	2444	2	full-splice_match	ENSSSCG00025003401	ENSSSCT00025004475	2457	2	13	0	13	0	multi-exon	FALSE	canonical	NA	NA	NA	NA	NA	NA	NA	TRUE	NA	NA	NA	A	coding	632	1899	120	2018	6344	8242	FALSE	25	CGTATTGGTATTTGAAATGC	NA	NA	NA	NA	AATAAA	-18_x000D_
PB.958.1	LUXX01000468.1	+	4368	4	novel_not_in_catalog	ENSSSCG00025003687	novel	4380	3	NA	NA	-13386	-571	at_least_one_novel_splicesite	FALSE	canonical	NA	NA	NA	NA	NA	NA	NA	TRUE	NA	NA	NA	B	coding	552	1659	580	2238	632530	648949	FALSE	45	AAAGATAAGAGAAGTTGTTT	NA	NA	NA	NA	AATAAA	-16_x000D_
PB.958.2	LUXX01000468.1	+	3102	4	novel_not_in_catalog	ENSSSCG00025003687	novel	4380	3	NA	NA	-13386	-1837	at_least_one_novel_splicesite	FALSE	canonical	NA	NA	NA	NA	NA	NA	NA	TRUE	NA	NA	NA	B	coding	552	1659	580	2238	632530	648949	FALSE	70	AAAAAAAGAAACCATTGAAA	NA	NA	NA	NA	AATATA	-42_x000D_
PB.958.3	LUXX01000468.1	+	2974	4	novel_not_in_catalog	ENSSSCG00025003687	novel	4380	3	NA	NA	-13384	-1963	at_least_one_novel_splicesite	FALSE	canonical	NA	NA	NA	NA	NA	NA	NA	TRUE	NA	NA	NA	B	coding	552	1659	578	2236	632530	648949	FALSE	40	AAAATGGAATAGTTTATTTC	NA	NA	NA	NA	AATAAA	-27_x000D_
PB.958.4	LUXX01000468.1	+	4240	4	novel_not_in_catalog	ENSSSCG00025003687	novel	4380	3	NA	NA	-13382	-695	at_least_one_novel_splicesite	FALSE	canonical	NA	NA	NA	NA	NA	NA	NA	TRUE	NA	NA	NA	B	coding	552	1659	576	2234	632530	648949	FALSE	20	AAGATTATTGCCTTTCTTTC	NA	NA	NA	NA	AATAAA	-12_x000D_
PB.958.5	LUXX01000468.1	+	3666	4	novel_not_in_catalog	ENSSSCG00025003687	novel	4380	3	NA	NA	-13381	-1268	at_least_one_novel_splicesite	FALSE	canonical	NA	NA	NA	NA	NA	NA	NA	TRUE	NA	NA	NA	B	coding	552	1659	575	2233	632530	648949	FALSE	75	AAAAAAAAAAAACTGATAGA	NA	NA	NA	NA	NA	NA_x000D_
PB.958.6	LUXX01000468.1	+	4927	4	novel_not_in_catalog	ENSSSCG00025003687	novel	4380	3	NA	NA	-13380	-6	at_least_one_novel_splicesite	FALSE	canonical	NA	NA	NA	NA	NA	NA	NA	TRUE	NA	NA	NA	B	coding	552	1659	574	2232	632530	648949	FALSE	35	TAAAAAGTGGGTTGGGACAT	NA	NA	NA	NA	AATAAA	-13_x000D_
PB.959.1	LUXX01000468.1	+	850	7	full-splice_match	ENSSSCG00025006059	ENSSSCT00025008082	863	7	17	-4	-2	4	multi-exon	FALSE	canonical	NA	NA	NA	NA	NA	NA	NA	TRUE	NA	NA	NA	A	coding	178	537	50	586	1646480	1711258	FALSE	25	TATTCAGTTTTGCATTAATT	NA	NA	NA	NA	AATAAA	-18_x000D_
PB.960.1	LUXX01000468.1	-	7179	48	full-splice_match	ENSSSCG00025006219	ENSSSCT00025008283	7249	48	62	8	62	2	multi-exon	FALSE	canonical	NA	NA	NA	NA	NA	NA	NA	TRUE	NA	NA	NA	C	coding	1777	5334	218	5551	1949702	1733698	FALSE	50	AAAACAACATATATGGATTC	NA	NA	NA	NA	AATAAA	-7_x000D_
PB.960.2	LUXX01000468.1	-	6290	48	novel_in_catalog	ENSSSCG00025006219	novel	7249	48	NA	NA	142	2	combination_of_known_junctions	FALSE	canonical	NA	NA	NA	NA	NA	NA	NA	TRUE	NA	NA	NA	C	coding	1796	5391	138	5528	1949702	1732832	FALSE	50	AAAACAACATATATGGATTC	NA	NA	NA	NA	AATAAA	-7_x000D_
PB.960.5	LUXX01000468.1	-	5798	48	novel_in_catalog	ENSSSCG00025006219	novel	7249	48	NA	NA	31	-601	combination_of_known_junctions	FALSE	canonical	NA	NA	NA	NA	NA	NA	NA	TRUE	NA	NA	NA	C	coding	1796	5391	249	5639	1949702	1732832	FALSE	50	AAATTAAGAAAAATCCCCTT	NA	NA	NA	NA	NA	NA_x000D_
PB.960.6	LUXX01000468.1	-	3571	27	novel_in_catalog	ENSSSCG00025006219	novel	7249	48	NA	NA	31	-103017	combination_of_known_junctions	FALSE	canonical	NA	NA	NA	NA	NA	NA	NA	TRUE	NA	NA	NA	C	coding	1107	3321	249	3569	1949702	1837781	FALSE	60	AAATACAAAAACAGGTGAGA	NA	NA	NA	NA	ATTAAA	-21_x000D_
PB.961.1	LUXX01000468.1	+	5189	27	novel_in_catalog	ENSSSCG00025006449	novel	8530	34	NA	NA	18991	3	combination_of_known_splicesites	FALSE	non_canonical	NA	NA	NA	NA	NA	NA	NA	TRUE	NA	NA	NA	A	coding	1082	3249	796	4044	2244742	2310453	FALSE	25	AACCACTCTGCCTTTGAATT	NA	NA	NA	NA	AATAAA	-15_x000D_
PB.961.2	LUXX01000468.1	+	5028	26	incomplete-splice_match	ENSSSCG00025006567	ENSSSCT00025008710	6755	51	5	166592	5	-166586	3prime_fragment	FALSE	non_canonical	NA	NA	NA	NA	NA	NA	NA	TRUE	NA	NA	NA	B	coding	1030	3093	794	3886	2244742	2310453	FALSE	20	GTCAACCACTCTGCCTTTGA	NA	NA	NA	NA	AATAAA	-12_x000D_
PB.961.3	LUXX01000468.1	+	2068	14	incomplete-splice_match	ENSSSCG00025006567	ENSSSCT00025008710	6755	51	5	216499	5	-216493	3prime_fragment	FALSE	non_canonical	NA	NA	NA	NA	NA	NA	NA	TRUE	NA	NA	NA	B	coding	425	1275	794	2068	2244742	2261688	FALSE	40	AAAAGTAGAAGGTAGGTGTT	NA	NA	NA	NA	AAGAAA	-33_x000D_
PB.962.1	LUXX01000468.1	+	3136	25	novel_in_catalog	ENSSSCG00025006567	novel	3594	27	NA	NA	229	2	combination_of_known_junctions	TRUE	canonical	NA	NA	NA	NA	NA	NA	NA	TRUE	NA	NA	NA	B	coding	859	2580	130	2709	2364674	2477756	FALSE	5	TTCTGGTTTTATTTGGTTTT	NA	NA	NA	NA	AATAAA	-15_x000D_
PB.963.1	LUXX01000468.1	+	1031	5	novel_not_in_catalog	ENSSSCG00025006968	novel	7377	5	NA	NA	5	-6356	at_least_one_novel_splicesite	FALSE	canonical	NA	NA	NA	NA	NA	NA	NA	TRUE	NA	NA	NA	A	coding	161	486	125	610	3192559	3610938	FALSE	25	AGTCTCAGTGGAAGTGTTCA	NA	NA	NA	NA	NA	NA_x000D_
PB.964.1	LUXX01000468.1	-	625	1	intergenic	novelGene_76	novel	NA	NA	NA	NA	NA	NA	mono-exon	FALSE	NA	NA	NA	NA	NA	NA	NA	NA	NA	NA	NA	NA	A	non_coding	NA	NA	NA	NA	NA	NA	NA	100	AAAAAAAAAAAAAAAAAAAA	NA	NA	NA	NA	AATGAA	-42_x000D_
PB.965.1	LUXX01000468.1	+	3141	14	incomplete-splice_match	ENSSSCG00025007523	ENSSSCT00025010041	4935	15	-18	7458	3	-468	3prime_fragment	FALSE	canonical	NA	NA	NA	NA	NA	NA	NA	TRUE	NA	NA	NA	B	coding	631	1896	214	2109	4829780	4850636	FALSE	45	ACCAGATAGCACCAGAAATT	NA	NA	NA	NA	AATAAA	-18_x000D_
PB.965.2	LUXX01000468.1	+	1778	12	incomplete-splice_match	ENSSSCG00025007523	ENSSSCT00025010041	4935	15	-7	11400	-7	-4410	3prime_fragment	FALSE	canonical	NA	NA	NA	NA	NA	NA	NA	TRUE	NA	NA	NA	B	coding	525	1575	203	1777	4829780	4847725	FALSE	65	AGAAAGAGAAAGAAAAGGAG	NA	NA	NA	NA	NA	NA_x000D_
PB.965.3	LUXX01000468.1	+	3595	14	incomplete-splice_match	ENSSSCG00025007523	ENSSSCT00025010041	4935	15	2	6984	2	6	3prime_fragment	FALSE	canonical	NA	NA	NA	NA	NA	NA	NA	TRUE	NA	NA	NA	B	coding	631	1896	194	2089	4829780	4850636	FALSE	25	TACACTTTGGAGTACTGGTA	NA	NA	NA	NA	AATAAA	-18_x000D_
PB.965.4	LUXX01000468.1	+	3235	14	incomplete-splice_match	ENSSSCG00025007523	ENSSSCT00025010041	4935	15	2	7344	2	-354	3prime_fragment	FALSE	canonical	NA	NA	NA	NA	NA	NA	NA	TRUE	NA	NA	NA	B	coding	631	1896	194	2089	4829780	4850636	FALSE	70	AAAAAAAAAAATCACTCAGA	NA	NA	NA	NA	NA	NA_x000D_
PB.966.1	LUXX01000468.1	+	1186	8	novel_in_catalog	ENSSSCG00025007651	novel	1126	9	NA	NA	0	-15	intron_retention	FALSE	canonical	NA	NA	NA	NA	NA	NA	NA	TRUE	NA	NA	NA	A	coding	352	1059	23	1081	5004884	5103428	FALSE	75	AATAATAAAATAAAGATAAA	NA	NA	NA	NA	AAGAAA	-35_x000D_
PB.4619.1	LUXX01000543.1	+	6541	6	novel_in_catalog	ENSSSCG00025012516	novel	6338	10	NA	NA	5	-15	intron_retention	FALSE	canonical	NA	NA	NA	NA	NA	NA	NA	TRUE	NA	NA	NA	A	coding	1281	3846	439	4284	234635	433439	FALSE	85	TAAAAAAAAAAAAAAGAAAG	NA	NA	NA	NA	NA	NA_x000D_
PB.4620.1	LUXX01000543.1	-	1868	1	intergenic	novelGene_358	novel	NA	NA	NA	NA	NA	NA	mono-exon	FALSE	NA	NA	NA	NA	NA	NA	NA	NA	NA	NA	NA	NA	A	non_coding	NA	NA	NA	NA	NA	NA	NA	100	AAAAAAAAAAAAAAAAAAAA	NA	NA	NA	NA	AAGAAA	-22_x000D_
PB.4621.1	LUXX01000543.1	-	1761	1	intergenic	novelGene_359	novel	NA	NA	NA	NA	NA	NA	mono-exon	FALSE	NA	NA	NA	NA	NA	NA	NA	NA	NA	NA	NA	NA	A	coding	115	348	443	790	289655	289308	NA	100	AAAAAAAAAAAAAAAAAAAA	NA	NA	NA	NA	AATGAA	-22_x000D_
PB.6952.1	LUXX01000585.1	-	1279	8	novel_in_catalog	ENSSSCG00025001427	novel	1295	8	NA	NA	15	2	combination_of_known_junctions	FALSE	canonical	NA	NA	NA	NA	NA	NA	NA	TRUE	NA	NA	NA	A	coding	357	1074	21	1094	101084	97234	FALSE	10	CTAGGACCTGTCTCTGTGGG	NA	NA	NA	NA	AATAAA	-18_x000D_
PB.6953.1	LUXX01000585.1	-	1289	7	full-splice_match	ENSSSCG00025001649	ENSSSCT00025002082	1586	7	289	8	289	-8	multi-exon	FALSE	canonical	NA	NA	NA	NA	NA	NA	NA	TRUE	NA	NA	NA	C	coding	287	864	24	887	126340	119885	FALSE	50	AAAAATGACACGTGAAATGG	NA	NA	NA	NA	ATTAAA	-10_x000D_
PB.6953.2	LUXX01000585.1	-	967	7	full-splice_match	ENSSSCG00025001649	ENSSSCT00025002082	1586	7	305	314	305	-314	multi-exon	FALSE	canonical	NA	NA	NA	NA	NA	NA	NA	TRUE	NA	NA	NA	C	coding	287	864	8	871	126340	119885	FALSE	10	TAGGCCCTTGTCTCCCCGAG	NA	NA	NA	NA	AATAAA	-23_x000D_
PB.6954.1	LUXX01000585.1	-	1312	7	full-splice_match	ENSSSCG00025002350	ENSSSCT00025003054	1760	7	447	1	427	-1	multi-exon	FALSE	canonical	NA	NA	NA	NA	NA	NA	NA	TRUE	NA	NA	NA	A	coding	252	759	40	798	234464	206666	FALSE	5	GCTTTCTTCTTTCTGGGACT	NA	NA	NA	NA	AATAAA	-12_x000D_
PB.3994.1	LUXX01000602.1	+	3235	22	novel_in_catalog	ENSSSCG00025001208	novel	6097	22	NA	NA	-12	-2336	combination_of_known_junctions	FALSE	canonical	NA	NA	NA	NA	NA	NA	NA	TRUE	NA	NA	NA	B	coding	981	2946	25	2970	1670122	1786105	FALSE	20	GCTGCTGTTTTGATGAATTA	NA	NA	NA	NA	AATAAA	-15_x000D_
PB.3994.2	LUXX01000602.1	+	3135	21	novel_in_catalog	ENSSSCG00025001208	novel	6467	21	NA	NA	0	-2336	combination_of_known_junctions	FALSE	canonical	NA	NA	NA	NA	NA	NA	NA	TRUE	NA	NA	NA	B	coding	952	2859	12	2870	1670122	1786105	FALSE	20	GCTGCTGTTTTGATGAATTA	NA	NA	NA	NA	AATAAA	-15_x000D_
PB.3995.1	LUXX01000602.1	+	4345	1	novel_in_catalog	ENSSSCG00025001648	novel	6050	33	NA	NA	-7	-96155	mono-exon	FALSE	NA	NA	NA	NA	NA	NA	NA	NA	NA	NA	NA	NA	B	non_coding	NA	NA	NA	NA	NA	NA	NA	60	AAAAAGAAAAAATGGATTTG	NA	NA	NA	NA	NA	NA_x000D_
PB.3995.2	LUXX01000602.1	+	6084	34	novel_not_in_catalog	ENSSSCG00025001648	novel	6098	36	NA	NA	0	1	intron_retention	FALSE	non_canonical	NA	NA	NA	NA	NA	NA	NA	TRUE	NA	NA	NA	B	coding	1406	4221	401	4621	1831827	1916054	TRUE	40	AAAACAGTTGCATTTATTAT	NA	NA	NA	NA	AATAAA	-17_x000D_
PB.3995.3	LUXX01000602.1	+	5878	34	novel_in_catalog	ENSSSCG00025001648	novel	6098	36	NA	NA	0	-191	intron_retention	TRUE	canonical	NA	NA	NA	NA	NA	NA	NA	TRUE	NA	NA	NA	B	coding	1715	5148	401	5548	1831827	1945344	FALSE	70	AAAAAGAAAGAAAAGATATT	NA	NA	NA	NA	NA	NA_x000D_
PB.3995.4	LUXX01000602.1	+	6068	34	novel_in_catalog	ENSSSCG00025001648	novel	6098	36	NA	NA	3	2	intron_retention	FALSE	canonical	NA	NA	NA	NA	NA	NA	NA	TRUE	NA	NA	NA	B	coding	1715	5148	398	5545	1831827	1945344	FALSE	35	AAACAGTTGCATTTATTATT	NA	NA	NA	NA	AATAAA	-18_x000D_
PB.3996.1	LUXX01000602.1	+	2217	1	intergenic	novelGene_318	novel	NA	NA	NA	NA	NA	NA	mono-exon	FALSE	NA	NA	NA	NA	NA	NA	NA	NA	NA	NA	NA	NA	A	coding	61	186	233	418	1957943	1958128	NA	80	AATAAAAGAAAAAAAAAATC	NA	NA	NA	NA	NA	NA_x000D_
PB.5591.1	LUXX01000748.1	+	2750	14	incomplete-splice_match	ENSSSCG00025001685	ENSSSCT00025002194	4837	15	3	2333	3	2	3prime_fragment	TRUE	canonical	NA	NA	NA	NA	NA	NA	NA	TRUE	NA	NA	NA	B	coding	796	2391	185	2575	1169256	1212012	FALSE	25	TGAACTGTGAAATTTTCCTG	NA	NA	NA	NA	AATAAA	-14_x000D_
PB.5591.2	LUXX01000748.1	+	2488	14	incomplete-splice_match	ENSSSCG00025001685	ENSSSCT00025002194	4837	15	35	2563	35	-228	3prime_fragment	FALSE	canonical	NA	NA	NA	NA	NA	NA	NA	TRUE	NA	NA	NA	B	coding	778	2334	153	2486	1169256	1211955	FALSE	50	ATCAGAACCAGCTAAAGTAA	NA	NA	NA	NA	AATAAA	-16_x000D_
PB.5591.3	LUXX01000748.1	+	5039	14	incomplete-splice_match	ENSSSCG00025001685	ENSSSCT00025002194	4837	15	51	-4	51	4	intron_retention	FALSE	canonical	NA	NA	NA	NA	NA	NA	NA	TRUE	NA	NA	NA	B	coding	796	2391	137	2527	1169256	1212012	FALSE	15	CTGATGTTCCCATTTCCTAT	NA	NA	NA	NA	AATAAA	-18_x000D_
PB.5592.1	LUXX01000748.1	+	2225	6	full-splice_match	ENSSSCG00025001774	ENSSSCT00025002261	2532	6	14	293	14	-293	multi-exon	FALSE	canonical	NA	NA	NA	NA	NA	NA	NA	TRUE	NA	NA	NA	C	coding	362	1089	81	1169	1222198	1265639	FALSE	45	TAAAATATAAGTCTGGAACT	NA	NA	NA	NA	AATAAA	-14_x000D_
PB.5592.2	LUXX01000748.1	+	2464	6	full-splice_match	ENSSSCG00025001774	ENSSSCT00025002261	2532	6	35	33	35	-33	multi-exon	FALSE	canonical	NA	NA	NA	NA	NA	NA	NA	TRUE	NA	NA	NA	C	coding	362	1089	60	1148	1222198	1265639	FALSE	75	AATAAATAAATAAATAAATA	NA	NA	NA	NA	TTTAAA	-15_x000D_
PB.4560.1	LUXX01000838.1	-	4493	6	novel_in_catalog	ENSSSCG00025002042	novel	4451	7	NA	NA	0	8	intron_retention	FALSE	canonical	NA	NA	NA	NA	NA	NA	NA	TRUE	NA	NA	NA	B	coding	149	450	210	659	118474	111561	FALSE	25	AACTGCGAACTCTGTAGGTT	NA	NA	NA	NA	AATAAA	-24_x000D_
PB.4560.3	LUXX01000838.1	-	4277	6	novel_in_catalog	ENSSSCG00025002042	novel	4451	7	NA	NA	0	-208	intron_retention	FALSE	canonical	NA	NA	NA	NA	NA	NA	NA	TRUE	NA	NA	NA	B	coding	149	450	210	659	118474	111561	FALSE	25	AAAGATGGTGGTAGTTGTTT	NA	NA	NA	NA	ATTAAA	-13_x000D_
PB.4560.4	LUXX01000838.1	-	1582	6	incomplete-splice_match	ENSSSCG00025002042	ENSSSCT00025002664	4451	7	0	2903	0	-2903	3prime_fragment	FALSE	canonical	NA	NA	NA	NA	NA	NA	NA	TRUE	NA	NA	NA	B	coding	149	450	210	659	118474	111561	FALSE	20	AGTGGTGTTAAATGCTTTGT	NA	NA	NA	NA	AATAAA	-17_x000D_
PB.4560.5	LUXX01000838.1	-	1033	6	incomplete-splice_match	ENSSSCG00025002042	ENSSSCT00025002664	4451	7	0	3452	0	-3452	3prime_fragment	FALSE	canonical	NA	NA	NA	NA	NA	NA	NA	TRUE	NA	NA	NA	B	coding	149	450	210	659	118474	111561	FALSE	80	AAAAACGAAAAATGAAAAAA	NA	NA	NA	NA	NA	NA_x000D_
PB.4560.6	LUXX01000838.1	-	727	6	incomplete-splice_match	ENSSSCG00025002042	ENSSSCT00025002664	4451	7	0	3758	0	-3758	3prime_fragment	FALSE	canonical	NA	NA	NA	NA	NA	NA	NA	TRUE	NA	NA	NA	B	coding	149	450	210	659	118474	111561	FALSE	100	AAAAAAAAAAAAAAAAAAAA	NA	NA	NA	NA	NA	NA_x000D_
PB.4561.1	LUXX01000838.1	+	6493	14	novel_not_in_catalog	ENSSSCG00025002168	novel	6488	14	NA	NA	2	1	at_least_one_novel_splicesite	FALSE	canonical	NA	NA	NA	NA	NA	NA	NA	TRUE	NA	NA	NA	A	coding	1166	3501	41	3541	188781	235870	FALSE	20	AAGTTGCCCATTGTGGTGCA	NA	NA	NA	NA	AATAAA	-13_x000D_
PB.4562.1	LUXX01000838.1	-	4697	8	novel_in_catalog	ENSSSCG00025002205	novel	1667	11	NA	NA	0	-130	intron_retention	FALSE	canonical	NA	NA	NA	NA	NA	NA	NA	TRUE	NA	NA	NA	C	coding	207	624	28	651	250856	243557	TRUE	10	AGTCGCTGCATCCTGCTTCT	NA	NA	NA	NA	AATAAA	-15_x000D_
PB.4562.2	LUXX01000838.1	-	4332	9	novel_in_catalog	ENSSSCG00025002205	novel	1667	11	NA	NA	0	-130	intron_retention	FALSE	canonical	NA	NA	NA	NA	NA	NA	NA	TRUE	NA	NA	NA	C	coding	207	624	28	651	250856	243557	TRUE	10	AGTCGCTGCATCCTGCTTCT	NA	NA	NA	NA	AATAAA	-15_x000D_
PB.4562.3	LUXX01000838.1	-	1537	11	full-splice_match	ENSSSCG00025002205	ENSSSCT00025002842	1667	11	0	130	0	-130	multi-exon	FALSE	canonical	NA	NA	NA	NA	NA	NA	NA	TRUE	NA	NA	NA	C	coding	440	1323	28	1350	250856	237599	FALSE	10	AGTCGCTGCATCCTGCTTCT	NA	NA	NA	NA	AATAAA	-15_x000D_
PB.4563.1	LUXX01000838.1	+	2300	1	intergenic	novelGene_354	novel	NA	NA	NA	NA	NA	NA	mono-exon	FALSE	NA	NA	NA	NA	NA	NA	NA	NA	NA	NA	NA	NA	A	non_coding	NA	NA	NA	NA	NA	NA	NA	100	AAAAAAAAAAAAAAAAAAAA	NA	NA	NA	NA	TATAAA	-29_x000D_
PB.4564.1	LUXX01000838.1	-	2112	14	full-splice_match	ENSSSCG00025003221	ENSSSCT00025004375	3031	14	82	837	6	-837	multi-exon	FALSE	canonical	NA	NA	NA	NA	NA	NA	NA	TRUE	NA	NA	NA	A	coding	505	1518	78	1595	1547502	1495907	FALSE	20	ATCATTCTGTTATTTTTCAT	NA	NA	NA	NA	AATAAA	-16_x000D_
PB.4565.1	LUXX01000838.1	-	5528	15	novel_in_catalog	ENSSSCG00025003820	novel	5861	18	NA	NA	-4	0	intron_retention	FALSE	canonical	NA	NA	NA	NA	NA	NA	NA	TRUE	NA	NA	NA	B	coding	604	1815	117	1931	1818330	1772234	FALSE	65	TAAAAAAAAAAAAAGTTTTG	NA	NA	NA	NA	AATAAA	-30_x000D_
PB.4565.2	LUXX01000838.1	-	2973	14	novel_in_catalog	ENSSSCG00025003820	novel	5861	18	NA	NA	5	899	intron_retention	FALSE	canonical	NA	NA	NA	NA	NA	NA	NA	TRUE	NA	NA	NA	B	coding	292	879	108	986	1818330	1808350	TRUE	25	ACTGCTGTTTTCAAGTATCA	NA	NA	NA	NA	ATTAAA	-22_x000D_
PB.4565.3	LUXX01000838.1	-	3369	16	novel_in_catalog	ENSSSCG00025003820	novel	5861	18	NA	NA	0	897	intron_retention	TRUE	canonical	NA	NA	NA	NA	NA	NA	NA	TRUE	NA	NA	NA	B	coding	338	1017	2087	3103	1804733	1772234	FALSE	25	ACACTGCTGTTTTCAAGTAT	NA	NA	NA	NA	ATTAAA	-20_x000D_
PB.4565.4	LUXX01000838.1	-	2193	15	novel_in_catalog	ENSSSCG00025003820	novel	5861	18	NA	NA	0	897	combination_of_known_junctions	FALSE	canonical	NA	NA	NA	NA	NA	NA	NA	TRUE	NA	NA	NA	B	coding	604	1815	113	1927	1818330	1772234	FALSE	25	ACACTGCTGTTTTCAAGTAT	NA	NA	NA	NA	ATTAAA	-20_x000D_
PB.4565.5	LUXX01000838.1	-	2585	17	incomplete-splice_match	ENSSSCG00025003820	ENSSSCT00025005279	5861	18	0	3332	0	896	3prime_fragment	FALSE	canonical	NA	NA	NA	NA	NA	NA	NA	TRUE	NA	NA	NA	B	coding	735	2208	113	2320	1818330	1772234	FALSE	25	TACACTGCTGTTTTCAAGTA	NA	NA	NA	NA	ATTAAA	-19_x000D_
PB.4565.6	LUXX01000838.1	-	2510	16	incomplete-splice_match	ENSSSCG00025003820	ENSSSCT00025005292	5786	17	0	3332	0	896	3prime_fragment	FALSE	canonical	NA	NA	NA	NA	NA	NA	NA	TRUE	NA	NA	NA	B	coding	710	2133	113	2245	1818330	1772234	FALSE	25	TACACTGCTGTTTTCAAGTA	NA	NA	NA	NA	ATTAAA	-19_x000D_
PB.4565.7	LUXX01000838.1	-	2438	17	incomplete-splice_match	ENSSSCG00025003820	ENSSSCT00025005279	5861	18	0	3479	0	749	3prime_fragment	FALSE	canonical	NA	NA	NA	NA	NA	NA	NA	TRUE	NA	NA	NA	B	coding	735	2208	113	2320	1818330	1772234	FALSE	35	AAATTTATTGCCTATCTGAA	NA	NA	NA	NA	AATATA	-17_x000D_
PB.4565.8	LUXX01000838.1	-	2044	15	novel_in_catalog	ENSSSCG00025003820	novel	5861	18	NA	NA	1	749	combination_of_known_junctions	FALSE	canonical	NA	NA	NA	NA	NA	NA	NA	TRUE	NA	NA	NA	B	coding	604	1815	112	1926	1818330	1772234	FALSE	35	AAATTTATTGCCTATCTGAA	NA	NA	NA	NA	AATATA	-17_x000D_
PB.4024.2	LUXX01000881.1	-	2837	3	novel_not_in_catalog	ENSSSCG00025002343	novel	2731	6	NA	NA	-24	-7673	intron_retention	FALSE	canonical	NA	NA	NA	NA	NA	NA	NA	TRUE	NA	NA	NA	B	non_coding	NA	NA	NA	NA	NA	NA	NA	30	ATGCTTTTGAAAATTTCTTA	NA	NA	NA	NA	ATTAAA	-17_x000D_
PB.4024.3	LUXX01000881.1	-	1233	3	novel_not_in_catalog	ENSSSCG00025002343	novel	2731	6	NA	NA	-6	-9259	at_least_one_novel_splicesite	FALSE	canonical	NA	NA	NA	NA	NA	NA	NA	TRUE	NA	NA	NA	B	non_coding	NA	NA	NA	NA	NA	NA	NA	75	AAATAAAAAAGATAAAAATG	NA	NA	NA	NA	NA	NA_x000D_
PB.4025.1	LUXX01000881.1	+	866	8	novel_not_in_catalog	ENSSSCG00025002923	novel	2774	9	NA	NA	-19	1	at_least_one_novel_splicesite	FALSE	non_canonical	NA	NA	NA	NA	NA	NA	NA	TRUE	NA	NA	NA	A	coding	230	693	50	742	288401	344949	FALSE	25	AAGCTTTGACTTAATCCTTG	NA	NA	NA	NA	ATTAAA	-14_x000D_
PB.4026.1	LUXX01000881.1	+	4732	29	novel_in_catalog	ENSSSCG00025003628	novel	6030	28	NA	NA	677	1	combination_of_known_splicesites	FALSE	canonical	NA	NA	NA	NA	NA	NA	NA	TRUE	NA	NA	NA	A	coding	1287	3864	149	4012	370901	592018	FALSE	15	AAGGAGCGGCTCTTTTTCTT	NA	NA	NA	NA	AATAAA	-16_x000D_
PB.4027.1	LUXX01000881.1	+	2840	4	incomplete-splice_match	ENSSSCG00025004274	ENSSSCT00025005682	1959	5	-7	1119	-7	-1119	3prime_fragment	FALSE	canonical	NA	NA	NA	NA	NA	NA	NA	TRUE	NA	NA	NA	A	coding	356	1071	54	1124	1561233	1582178	FALSE	5	CTTGTCTTTGCTTTTATTTT	NA	NA	NA	NA	AATAAA	-20_x000D_
PB.7243.1	LUXX01000893.1	-	6153	29	novel_in_catalog	ENSSSCG00025001219	novel	6175	29	NA	NA	6	-9	combination_of_known_junctions	FALSE	canonical	NA	NA	NA	NA	NA	NA	NA	TRUE	NA	NA	NA	A	coding	1912	5739	178	5916	118363	91770	FALSE	80	AAAAAAAAGAAAAAATAATT	NA	NA	NA	NA	NA	NA_x000D_
PB.7244.4	LUXX01000893.1	-	1767	10	full-splice_match	ENSSSCG00025001416	ENSSSCT00025001879	2046	10	105	174	-74	2	multi-exon	FALSE	canonical	NA	NA	NA	NA	NA	NA	NA	TRUE	NA	NA	NA	A	coding	528	1587	22	1608	147239	139805	FALSE	10	ATCATCTGTCTGTTGTTCTT	NA	NA	NA	NA	AATAAA	-14_x000D_
PB.7245.1	LUXX01000893.1	-	803	8	novel_in_catalog	ENSSSCG00025001881	novel	6119	10	NA	NA	-33	1	combination_of_known_junctions	FALSE	canonical	NA	NA	NA	NA	NA	NA	NA	TRUE	NA	NA	NA	A	coding	215	648	45	692	212118	200130	FALSE	20	GAATTCCGTGGGTGCTTAAT	NA	NA	NA	NA	AATAAA	-21_x000D_
PB.2825.1	LUXX01000900.1	+	2797	13	novel_not_in_catalog	ENSSSCG00025002508	novel	4696	14	NA	NA	162	-2	intron_retention	FALSE	non_canonical	NA	NA	NA	NA	NA	NA	NA	TRUE	NA	NA	NA	A	coding	754	2265	454	2718	258894	300158	FALSE	30	AAGGAACGATCATGTGCTGG	NA	NA	NA	NA	AATAAA	-22_x000D_
PB.2826.1	LUXX01000900.1	+	2212	7	novel_in_catalog	ENSSSCG00025002824	novel	2393	8	NA	NA	-36	-4	intron_retention	FALSE	canonical	NA	NA	NA	NA	NA	NA	NA	TRUE	NA	NA	NA	A	coding	272	819	150	968	1160404	1170282	FALSE	40	AACAAGTTTTGAAAATCCTT	NA	NA	NA	NA	AATAAA	-16_x000D_
PB.2827.1	LUXX01000900.1	+	2468	14	novel_in_catalog	ENSSSCG00025003847	novel	2512	14	NA	NA	-5	-2	combination_of_known_splicesites	FALSE	canonical	NA	NA	NA	NA	NA	NA	NA	TRUE	NA	NA	NA	C	coding	536	1611	157	1767	1796485	1811504	FALSE	25	CATCATGGCTCAGTGGTTAA	NA	NA	NA	NA	AATAAA	-16_x000D_
PB.2827.2	LUXX01000900.1	+	2309	13	full-splice_match	ENSSSCG00025003847	ENSSSCT00025005063	2329	13	19	1	-10	-1	multi-exon	FALSE	canonical	NA	NA	NA	NA	NA	NA	NA	TRUE	NA	NA	NA	C	coding	516	1551	57	1607	1796409	1811504	FALSE	25	ATCATGGCTCAGTGGTTAAT	NA	NA	NA	NA	AATAAA	-17_x000D_
PB.2827.3	LUXX01000900.1	+	2326	12	incomplete-splice_match	ENSSSCG00025003847	ENSSSCT00025005085	2512	14	1311	6	1	-1	5prime_fragment	FALSE	canonical	NA	NA	NA	NA	NA	NA	NA	TRUE	NA	NA	NA	C	coding	355	1068	557	1624	1800455	1811504	FALSE	25	ATCATGGCTCAGTGGTTAAT	NA	NA	NA	NA	AATAAA	-17_x000D_
PB.2828.1	LUXX01000900.1	+	2042	7	novel_in_catalog	ENSSSCG00025001030	novel	3675	7	NA	NA	-1	-1005	combination_of_known_junctions	FALSE	canonical	NA	NA	NA	NA	NA	NA	NA	TRUE	NA	NA	NA	A	coding	318	957	112	1068	2780468	2805759	FALSE	25	GTGGGTGCCTCCAAATACAT	NA	NA	NA	NA	AATAAA	-14_x000D_
PB.2829.1	LUXX01000900.1	+	2102	1	genic	ENSSSCG00025001517	novel	NA	NA	NA	NA	-617	1	mono-exon	FALSE	NA	NA	NA	NA	NA	NA	NA	NA	NA	NA	NA	NA	B	non_coding	NA	NA	NA	NA	NA	NA	NA	5	GCTGGTGTGATGGTCTGGTC	NA	NA	NA	NA	AATAAA	-15_x000D_
PB.2829.2	LUXX01000900.1	+	1695	2	novel_in_catalog	ENSSSCG00025001517	novel	804	3	NA	NA	-617	1	intron_retention	FALSE	canonical	NA	NA	NA	NA	NA	NA	NA	TRUE	NA	NA	NA	B	non_coding	NA	NA	NA	NA	NA	NA	NA	5	GCTGGTGTGATGGTCTGGTC	NA	NA	NA	NA	AATAAA	-15_x000D_
PB.2829.3	LUXX01000900.1	+	598	3	novel_not_in_catalog	ENSSSCG00025001517	novel	804	3	NA	NA	-617	1	at_least_one_novel_splicesite	FALSE	canonical	NA	NA	NA	NA	NA	NA	NA	TRUE	NA	NA	NA	B	non_coding	NA	NA	NA	NA	NA	NA	NA	5	GCTGGTGTGATGGTCTGGTC	NA	NA	NA	NA	AATAAA	-15_x000D_
PB.5767.1	LUXX01000944.1	+	2853	1	antisense	novelGene_ENSSSCG00025002241_AS	novel	NA	NA	NA	NA	NA	NA	mono-exon	FALSE	NA	NA	NA	NA	NA	NA	NA	NA	NA	NA	NA	NA	A	non_coding	NA	NA	NA	NA	NA	NA	NA	100	AAAAAAAAAAAAAAAAAAAA	NA	NA	NA	NA	NA	NA_x000D_
PB.5768.1	LUXX01000944.1	+	1785	13	intergenic	novelGene_445	novel	NA	NA	NA	NA	NA	NA	multi-exon	FALSE	non_canonical	NA	NA	NA	NA	NA	NA	NA	TRUE	NA	NA	NA	A	non_coding	NA	NA	NA	NA	NA	NA	NA	15	ACCAGCGCTCCGCGACTCCC	NA	NA	NA	NA	NA	NA_x000D_
PB.5769.13	LUXX01000944.1	-	3636	16	novel_in_catalog	ENSSSCG00025002241	novel	3736	16	NA	NA	35	0	combination_of_known_junctions	FALSE	canonical	NA	NA	NA	NA	NA	NA	NA	TRUE	NA	NA	NA	C	coding	798	2397	66	2462	128393	96285	FALSE	20	TAAATTGGATGTTTCGGCTC	NA	NA	NA	NA	AATAAA	-16_x000D_
PB.5769.17	LUXX01000944.1	-	3160	16	novel_in_catalog	ENSSSCG00025002241	novel	3760	17	NA	NA	40	-471	combination_of_known_junctions	FALSE	canonical	NA	NA	NA	NA	NA	NA	NA	TRUE	NA	NA	NA	C	coding	798	2397	61	2457	128393	96285	FALSE	50	AAAAAAAAGTTCTTTATTTA	NA	NA	NA	NA	GATAAA	-21_x000D_
PB.5769.2	LUXX01000944.1	-	3716	17	full-splice_match	ENSSSCG00025002241	ENSSSCT00025003122	3760	17	36	8	36	1	multi-exon	FALSE	canonical	NA	NA	NA	NA	NA	NA	NA	TRUE	NA	NA	NA	C	coding	802	2409	133	2541	128578	96285	FALSE	20	AAATTGGATGTTTCGGCTCT	NA	NA	NA	NA	AATAAA	-17_x000D_
PB.5769.22	LUXX01000944.1	-	2367	15	incomplete-splice_match	ENSSSCG00025002241	ENSSSCT00025003170	6769	16	52	7901	31	-7897	3prime_fragment	FALSE	canonical	NA	NA	NA	NA	NA	NA	NA	TRUE	NA	NA	NA	C	coding	766	2298	70	2367	128393	103008	FALSE	60	GAAAAGGAAAAAATGAATGC	NA	NA	NA	NA	NA	NA_x000D_
PB.5769.23	LUXX01000944.1	-	2037	14	incomplete-splice_match	ENSSSCG00025002241	ENSSSCT00025003170	6769	16	40	10159	19	-10155	3prime_fragment	FALSE	canonical	NA	NA	NA	NA	NA	NA	NA	TRUE	NA	NA	NA	C	coding	652	1956	82	2037	128393	105266	FALSE	70	AATAAAGGAGAAAAGAAAGA	NA	NA	NA	NA	AATATA	-45_x000D_
PB.5769.24	LUXX01000944.1	-	1699	12	incomplete-splice_match	ENSSSCG00025002241	ENSSSCT00025003170	6769	16	53	11694	32	-11690	3prime_fragment	FALSE	canonical	NA	NA	NA	NA	NA	NA	NA	TRUE	NA	NA	NA	C	coding	543	1629	69	1697	128393	106803	FALSE	40	AAACGAAATTTATTCTGGCA	NA	NA	NA	NA	NA	NA_x000D_
PB.5770.1	LUXX01000944.1	-	6049	17	novel_in_catalog	ENSSSCG00025002910	novel	6569	18	NA	NA	741	-4	combination_of_known_junctions	FALSE	canonical	NA	NA	NA	NA	NA	NA	NA	TRUE	NA	NA	NA	A	coding	923	2772	462	3233	447771	302930	FALSE	45	TAAAATATCCCAAACCTGAT	NA	NA	NA	NA	ATTAAA	-9_x000D_
PB.5458.1	LUXX01000948.1	-	2799	8	full-splice_match	ENSSSCG00025000983	ENSSSCT00025001166	2897	8	0	98	0	-98	multi-exon	FALSE	canonical	NA	NA	NA	NA	NA	NA	NA	TRUE	NA	NA	NA	C	coding	539	1620	138	1757	578325	567676	FALSE	40	AAAAATTATGATTTCTCCCA	NA	NA	NA	NA	CATAAA	-9_x000D_
PB.5458.2	LUXX01000948.1	-	1911	8	full-splice_match	ENSSSCG00025000983	ENSSSCT00025001166	2897	8	29	957	29	-957	multi-exon	FALSE	canonical	NA	NA	NA	NA	NA	NA	NA	TRUE	NA	NA	NA	C	coding	539	1620	109	1728	578325	567676	FALSE	25	ATACCCCTTTTTCTGAGAAC	NA	NA	NA	NA	ATTAAA	-19_x000D_
PB.5459.1	LUXX01000948.1	+	2697	22	full-splice_match	ENSSSCG00025001544	ENSSSCT00025002256	4783	22	205	1881	-2	20	multi-exon	TRUE	canonical	NA	NA	NA	NA	NA	NA	NA	TRUE	NA	NA	NA	A	coding	673	2022	24	2045	591252	691312	FALSE	80	AAAAAACAAAAGACTAAAAA	NA	NA	NA	NA	AATATA	-39_x000D_
PB.5460.1	LUXX01000948.1	+	2470	6	novel_in_catalog	ENSSSCG00025002056	novel	3571	6	NA	NA	-58	-1567	intron_retention	FALSE	canonical	NA	NA	NA	NA	NA	NA	NA	TRUE	NA	NA	NA	B	coding	208	627	160	786	773562	816118	FALSE	75	AAAAAAAAAAAATCAAACGT	NA	NA	NA	NA	NA	NA_x000D_
PB.5460.2	LUXX01000948.1	+	4007	6	novel_in_catalog	ENSSSCG00025002056	novel	3571	6	NA	NA	-49	-21	intron_retention	FALSE	canonical	NA	NA	NA	NA	NA	NA	NA	TRUE	NA	NA	NA	B	coding	208	627	151	777	773562	816118	FALSE	70	AATAAAGAAAAGAAGAGGAA	NA	NA	NA	NA	NA	NA_x000D_
PB.5460.3	LUXX01000948.1	+	1776	6	novel_in_catalog	ENSSSCG00025002056	novel	3571	6	NA	NA	-20	-2223	intron_retention	FALSE	canonical	NA	NA	NA	NA	NA	NA	NA	TRUE	NA	NA	NA	B	coding	208	627	122	748	773562	816118	FALSE	45	AAAAATGATCCAATACTGTT	NA	NA	NA	NA	NA	NA_x000D_
PB.5461.1	LUXX01000948.1	-	2672	18	novel_in_catalog	ENSSSCG00025002466	novel	2912	18	NA	NA	-7	2	combination_of_known_junctions	FALSE	canonical	NA	NA	NA	NA	NA	NA	NA	TRUE	NA	NA	NA	A	coding	617	1854	149	2002	995836	915504	FALSE	30	AAGCATAAGTGTTCTCAGTG	NA	NA	NA	NA	AATAAA	-20_x000D_
PB.687.1	LUXX01000974.1	+	3943	2	novel_in_catalog	ENSSSCG00025003263	novel	2918	3	NA	NA	43	1	intron_retention	FALSE	canonical	NA	NA	NA	NA	NA	NA	NA	TRUE	NA	NA	NA	A	coding	297	894	1239	2132	28003	31462	FALSE	30	AAAATAGATTCCTTTTTTTT	NA	NA	NA	NA	AATAAA	-20_x000D_
PB.688.1	LUXX01000974.1	-	5505	11	novel_not_in_catalog	ENSSSCG00025003500	novel	5948	12	NA	NA	-72	2	intron_retention	FALSE	canonical	NA	NA	NA	NA	NA	NA	NA	TRUE	NA	NA	NA	B	coding	452	1359	442	1800	176369	86614	FALSE	10	CTCCAGACTCTGTCGTGTTT	NA	NA	NA	NA	AGTAAA	-24_x000D_
PB.688.2	LUXX01000974.1	-	2420	12	novel_in_catalog	ENSSSCG00025003500	novel	5948	12	NA	NA	-10	-3075	intron_retention	FALSE	canonical	NA	NA	NA	NA	NA	NA	NA	TRUE	NA	NA	NA	B	coding	494	1485	380	1864	176369	86614	FALSE	85	AAAAAACAAAAAAACAAAAC	NA	NA	NA	NA	NA	NA_x000D_
PB.688.3	LUXX01000974.1	-	2391	11	novel_in_catalog	ENSSSCG00025003500	novel	5221	14	NA	NA	1	-3075	intron_retention	FALSE	canonical	NA	NA	NA	NA	NA	NA	NA	TRUE	NA	NA	NA	B	coding	488	1467	369	1835	176369	86614	FALSE	85	AAAAAACAAAAAAACAAAAC	NA	NA	NA	NA	NA	NA_x000D_
PB.688.4	LUXX01000974.1	-	2289	11	novel_not_in_catalog	ENSSSCG00025003500	novel	5221	14	NA	NA	1	-3075	intron_retention	FALSE	canonical	NA	NA	NA	NA	NA	NA	NA	TRUE	NA	NA	NA	B	coding	454	1365	369	1733	176369	86614	FALSE	85	AAAAAACAAAAAAACAAAAC	NA	NA	NA	NA	NA	NA_x000D_
PB.689.1	LUXX01000974.1	-	3446	10	novel_in_catalog	ENSSSCG00025003872	novel	1946	11	NA	NA	0	1532	combination_of_known_junctions	FALSE	canonical	NA	NA	NA	NA	NA	NA	NA	TRUE	NA	NA	NA	B	coding	367	1104	125	1228	591159	403422	FALSE	40	AAAATTGGCCTACATTCTAA	NA	NA	NA	NA	TATAAA	-20_x000D_
PB.689.2	LUXX01000974.1	-	3336	10	novel_in_catalog	ENSSSCG00025003872	novel	1946	11	NA	NA	-4	1429	combination_of_known_junctions	FALSE	canonical	NA	NA	NA	NA	NA	NA	NA	TRUE	NA	NA	NA	B	coding	367	1104	118	1221	591159	403422	FALSE	15	AGAATTTGTCTTCTTTGGTT	NA	NA	NA	NA	NA	NA_x000D_
PB.690.1	LUXX01000974.1	+	2169	1	intergenic	novelGene_41	novel	NA	NA	NA	NA	NA	NA	mono-exon	FALSE	NA	NA	NA	NA	NA	NA	NA	NA	NA	NA	NA	NA	A	non_coding	NA	NA	NA	NA	NA	NA	NA	70	AAAAAAAAAGAGAGAAATTG	NA	NA	NA	NA	NA	NA_x000D_
PB.691.1	LUXX01000974.1	+	1449	1	intergenic	novelGene_42	novel	NA	NA	NA	NA	NA	NA	mono-exon	FALSE	NA	NA	NA	NA	NA	NA	NA	NA	NA	NA	NA	NA	A	non_coding	NA	NA	NA	NA	NA	NA	NA	80	AAAAAGAAAGAAAGAAAAAG	NA	NA	NA	NA	NA	NA_x000D_
PB.692.1	LUXX01000974.1	+	2724	15	incomplete-splice_match	ENSSSCG00025004150	ENSSSCT00025005517	6521	21	256162	2202	256162	-1294	5prime_fragment	FALSE	canonical	NA	NA	NA	NA	NA	NA	NA	TRUE	NA	NA	NA	A	coding	817	2454	99	2552	1161781	1203155	FALSE	35	AATATGCAAGCAGCTTTTTA	NA	NA	NA	NA	AGTAAA	-25_x000D_
PB.693.1	LUXX01000974.1	-	1173	6	full-splice_match	ENSSSCG00025004464	ENSSSCT00025005992	4734	6	-1	3562	-1	2	multi-exon	FALSE	canonical	NA	NA	NA	NA	NA	NA	NA	TRUE	NA	NA	NA	A	coding	212	639	43	681	2066865	2004900	FALSE	15	ATGTGTGTGTGAAGTTTTTT	NA	NA	NA	NA	AATAAA	-14_x000D_
PB.694.1	LUXX01000974.1	-	5200	35	incomplete-splice_match	ENSSSCG00025004649	ENSSSCT00025006291	5265	37	14768	-265	0	265	5prime_fragment	TRUE	canonical	NA	NA	NA	NA	NA	NA	NA	TRUE	NA	NA	NA	B	coding	1492	4479	170	4648	2457696	2360489	FALSE	90	AAAAAAAAAAAAGAAAGAAA	NA	NA	NA	NA	NA	NA_x000D_
PB.694.2	LUXX01000974.1	-	4960	35	incomplete-splice_match	ENSSSCG00025004649	ENSSSCT00025006291	5265	37	14745	-2	-23	2	5prime_fragment	FALSE	canonical	NA	NA	NA	NA	NA	NA	NA	TRUE	NA	NA	NA	B	coding	1492	4479	193	4671	2457696	2360489	FALSE	15	AGTTCCCATTGTGGCTCAGT	NA	NA	NA	NA	ATTAAA	-13_x000D_
PB.694.3	LUXX01000974.1	-	4699	35	incomplete-splice_match	ENSSSCG00025004649	ENSSSCT00025006291	5265	37	14773	231	5	-231	5prime_fragment	FALSE	canonical	NA	NA	NA	NA	NA	NA	NA	TRUE	NA	NA	NA	B	coding	1492	4479	165	4643	2457696	2360489	FALSE	15	ACTTTTTGCTTTTTTGTATA	NA	NA	NA	NA	TATAAA	-15_x000D_
PB.695.1	LUXX01000974.1	-	2617	9	novel_in_catalog	ENSSSCG00025007334	novel	2601	10	NA	NA	5	183	combination_of_known_junctions	FALSE	canonical	NA	NA	NA	NA	NA	NA	NA	TRUE	NA	NA	NA	A	coding	267	804	43	846	3009673	2838779	FALSE	10	ATCCTTGCCAGCTTTTGGTG	NA	NA	NA	NA	AATAAA	-18_x000D_
PB.696.1	LUXX01000974.1	+	1965	9	novel_not_in_catalog	ENSSSCG00025007830	novel	2013	12	NA	NA	-80	1	at_least_one_novel_splicesite	FALSE	canonical	NA	NA	NA	NA	NA	NA	NA	TRUE	NA	NA	NA	B	coding	244	735	198	932	4048828	4275058	FALSE	15	TCATTTTCATTTATTCCCTT	NA	NA	NA	NA	AATAAA	-17_x000D_
PB.696.2	LUXX01000974.1	+	2000	11	novel_not_in_catalog	ENSSSCG00025007830	novel	2013	12	NA	NA	-2	3	at_least_one_novel_splicesite	FALSE	canonical	NA	NA	NA	NA	NA	NA	NA	TRUE	NA	NA	NA	B	coding	281	846	120	965	4048828	4275058	FALSE	15	ATTTTCATTTATTCCCTTTG	NA	NA	NA	NA	AATAAA	-19_x000D_
PB.697.1	LUXX01000974.1	+	2018	1	intergenic	novelGene_43	novel	NA	NA	NA	NA	NA	NA	mono-exon	FALSE	NA	NA	NA	NA	NA	NA	NA	NA	NA	NA	NA	NA	A	non_coding	NA	NA	NA	NA	NA	NA	NA	100	AAAAAAAAAAAAAAAAAAAA	NA	NA	NA	NA	NA	NA_x000D_
PB.698.1	LUXX01000974.1	+	2759	1	genic	ENSSSCG00025005864	novel	NA	NA	NA	NA	-15	-23277	mono-exon	FALSE	NA	NA	NA	NA	NA	NA	NA	NA	NA	NA	NA	NA	A	non_coding	NA	NA	NA	NA	NA	NA	NA	90	AAAAAAGACAAAAAAAAAAA	NA	NA	NA	NA	NA	NA_x000D_
PB.699.1	LUXX01000974.1	-	1201	1	intergenic	novelGene_44	novel	NA	NA	NA	NA	NA	NA	mono-exon	FALSE	NA	NA	NA	NA	NA	NA	NA	NA	NA	NA	NA	NA	A	non_coding	NA	NA	NA	NA	NA	NA	NA	100	AAAAAAAAAAAAAAAAAAAA	NA	NA	NA	NA	AAAACA	-19_x000D_
PB.5477.1	LUXX01001166.1	+	3071	19	novel_not_in_catalog	ENSSSCG00025006461	novel	3077	19	NA	NA	0	0	at_least_one_novel_splicesite	FALSE	canonical	NA	NA	NA	NA	NA	NA	NA	TRUE	NA	NA	NA	A	coding	783	2352	287	2638	89883	197059	FALSE	5	ACCCTTGCCTGGCCTGCTCC	NA	NA	NA	NA	AATAAA	-21_x000D_
PB.5478.1	LUXX01001166.1	+	1125	1	antisense	novelGene_ENSSSCG00025006719_AS	novel	NA	NA	NA	NA	NA	NA	mono-exon	FALSE	NA	NA	NA	NA	NA	NA	NA	NA	NA	NA	NA	NA	A	non_coding	NA	NA	NA	NA	NA	NA	NA	90	AAAAAGACAAAAAAAAAAAA	NA	NA	NA	NA	NA	NA_x000D_
PB.5479.1	LUXX01001166.1	-	4324	27	novel_not_in_catalog	ENSSSCG00025006719	novel	6797	29	NA	NA	11	6	at_least_one_novel_splicesite	FALSE	canonical	NA	NA	NA	NA	NA	NA	NA	TRUE	NA	NA	NA	B	coding	650	1953	1902	3854	323243	303036	FALSE	5	TCTGGCGTCCATGTGTCTTT	NA	NA	NA	NA	AATACA	-19_x000D_
PB.5479.2	LUXX01001166.1	-	4164	26	novel_not_in_catalog	ENSSSCG00025006719	novel	6797	29	NA	NA	6	6	at_least_one_novel_splicesite	FALSE	canonical	NA	NA	NA	NA	NA	NA	NA	TRUE	NA	NA	NA	B	coding	1120	3363	332	3694	351903	303036	FALSE	5	TCTGGCGTCCATGTGTCTTT	NA	NA	NA	NA	AATACA	-19_x000D_
PB.5479.4	LUXX01001166.1	-	4337	27	novel_not_in_catalog	ENSSSCG00025006719	novel	6797	29	NA	NA	2	5	at_least_one_novel_splicesite	FALSE	canonical	NA	NA	NA	NA	NA	NA	NA	TRUE	NA	NA	NA	B	coding	1217	3654	215	3868	353167	303036	FALSE	5	GTCTGGCGTCCATGTGTCTT	NA	NA	NA	NA	AATACA	-18_x000D_
PB.5479.5	LUXX01001166.1	-	4298	26	novel_in_catalog	ENSSSCG00025006719	novel	6797	29	NA	NA	6	4	combination_of_known_junctions	FALSE	canonical	NA	NA	NA	NA	NA	NA	NA	TRUE	NA	NA	NA	B	coding	1217	3654	177	3830	353167	303036	FALSE	5	TGTCTGGCGTCCATGTGTCT	NA	NA	NA	NA	AATACA	-17_x000D_
PB.5480.1	LUXX01001166.1	+	2811	19	incomplete-splice_match	ENSSSCG00025006847	ENSSSCT00025009116	4052	21	1	17936	1	2	3prime_fragment	FALSE	canonical	NA	NA	NA	NA	NA	NA	NA	TRUE	NA	NA	NA	A	coding	785	2358	17	2374	356756	388008	FALSE	20	AGATGCCAGTGTGTTTTCCA	NA	NA	NA	NA	AATAAA	-15_x000D_
PB.5481.1	LUXX01001166.1	-	4109	24	incomplete-splice_match	ENSSSCG00025007029	ENSSSCT00025009425	8747	27	-43	7091	-4	1	3prime_fragment	TRUE	canonical	NA	NA	NA	NA	NA	NA	NA	TRUE	NA	NA	NA	A	coding	1083	3252	193	3444	404400	389408	FALSE	25	AAGGTTGTCCTCCTAAAGCT	NA	NA	NA	NA	AATAAA	-16_x000D_
PB.5482.1	LUXX01001166.1	+	3161	6	fusion	ENSSSCG00025007201_ENSSSCG00025005414	novel	1880	3	NA	NA	-4	-15857	intron_retention	FALSE	canonical	NA	NA	NA	NA	NA	NA	NA	TRUE	NA	NA	NA	B	coding	237	714	197	910	464461	475734	FALSE	70	AAAAAGAACAAAGAAACTAT	NA	NA	NA	NA	TTTAAA	-42_x000D_
PB.5482.2	LUXX01001166.1	+	3645	8	fusion	ENSSSCG00025005414_ENSSSCG00025007201	novel	8459	11	NA	NA	8	-17002	intron_retention	FALSE	canonical	NA	NA	NA	NA	NA	NA	NA	TRUE	NA	NA	NA	B	coding	350	1053	1487	2539	461185	475734	FALSE	10	ATTGGGGCACTTGCTGCTTC	NA	NA	NA	NA	AATAAA	-18_x000D_
PB.5482.3	LUXX01001166.1	+	2937	5	fusion	ENSSSCG00025007201_ENSSSCG00025005414	novel	1880	3	NA	NA	26	-15857	intron_retention	FALSE	canonical	NA	NA	NA	NA	NA	NA	NA	TRUE	NA	NA	NA	B	coding	172	519	168	686	470197	475734	FALSE	70	AAAAAGAACAAAGAAACTAT	NA	NA	NA	NA	TTTAAA	-42_x000D_
PB.5482.4	LUXX01001166.1	+	4461	7	fusion	ENSSSCG00025005414_ENSSSCG00025007201	novel	8459	11	NA	NA	74	-15857	intron_retention	FALSE	canonical	NA	NA	NA	NA	NA	NA	NA	TRUE	NA	NA	NA	B	coding	350	1053	1158	2210	461185	475734	FALSE	70	AAAAAGAACAAAGAAACTAT	NA	NA	NA	NA	TTTAAA	-42_x000D_
PB.5483.1	LUXX01001166.1	-	2978	12	incomplete-splice_match	ENSSSCG00025005575	ENSSSCT00025007474	2944	13	-2	792	-2	-792	3prime_fragment	FALSE	canonical	NA	NA	NA	NA	NA	NA	NA	TRUE	NA	NA	NA	B	coding	478	1437	99	1535	512112	490392	FALSE	20	TAAAATGTGTGTGTGTGTGT	NA	NA	NA	NA	AATATA	-18_x000D_
PB.5484.1	LUXX01001166.1	-	3897	12	incomplete-splice_match	ENSSSCG00025005575	ENSSSCT00025007600	6427	14	22	4636	22	-4636	3prime_fragment	FALSE	canonical	NA	NA	NA	NA	NA	NA	NA	TRUE	NA	NA	NA	B	coding	479	1440	102	1541	551992	525948	FALSE	10	TTTTTTTGAGTGTTTATTGG	NA	NA	NA	NA	CATAAA	-17_x000D_
PB.5484.2	LUXX01001166.1	-	3385	12	incomplete-splice_match	ENSSSCG00025005575	ENSSSCT00025007600	6427	14	35	5135	35	-5135	3prime_fragment	FALSE	canonical	NA	NA	NA	NA	NA	NA	NA	TRUE	NA	NA	NA	B	coding	479	1440	89	1528	551992	525948	FALSE	40	AAATCTAGATCAACAGTTCT	NA	NA	NA	NA	AATAAA	-15_x000D_
PB.5484.3	LUXX01001166.1	-	1799	12	incomplete-splice_match	ENSSSCG00025005575	ENSSSCT00025007600	6427	14	7	6749	7	-6749	3prime_fragment	FALSE	canonical	NA	NA	NA	NA	NA	NA	NA	TRUE	NA	NA	NA	B	coding	479	1440	117	1556	551992	525948	FALSE	20	AAATTCCATCTTTTTTTTTT	NA	NA	NA	NA	AATACA	-19_x000D_
PB.5485.1	LUXX01001166.1	+	3339	21	novel_in_catalog	ENSSSCG00025005744	novel	3551	23	NA	NA	10	-10	combination_of_known_splicesites	FALSE	canonical	NA	NA	NA	NA	NA	NA	NA	TRUE	NA	NA	NA	B	coding	968	2907	73	2979	562843	582132	FALSE	30	GATAATGCCACATGATCGCT	NA	NA	NA	NA	AATAAA	-20_x000D_
PB.5485.2	LUXX01001166.1	+	3421	22	novel_in_catalog	ENSSSCG00025005744	novel	3551	23	NA	NA	16	-11	combination_of_known_splicesites	FALSE	canonical	NA	NA	NA	NA	NA	NA	NA	TRUE	NA	NA	NA	B	coding	968	2907	156	3062	562843	582132	FALSE	30	TGATAATGCCACATGATCGC	NA	NA	NA	NA	AATAAA	-19_x000D_
PB.5485.3	LUXX01001166.1	+	3623	21	novel_not_in_catalog	ENSSSCG00025005744	novel	3551	23	NA	NA	36	-9	at_least_one_novel_splicesite	FALSE	canonical	NA	NA	NA	NA	NA	NA	NA	TRUE	NA	NA	NA	B	coding	968	2907	356	3262	562843	582132	FALSE	30	ATAATGCCACATGATCGCTT	NA	NA	NA	NA	AATAAA	-21_x000D_
PB.5486.1	LUXX01001166.1	-	1794	12	incomplete-splice_match	ENSSSCG00025005831	ENSSSCT00025007781	3503	13	-23	2208	-23	-2208	3prime_fragment	FALSE	canonical	NA	NA	NA	NA	NA	NA	NA	TRUE	NA	NA	NA	A	coding	451	1356	82	1437	614845	600884	FALSE	25	AGACCTGCGAATGCTCATTG	NA	NA	NA	NA	ATTAAA	-19_x000D_
PB.5487.1	LUXX01001166.1	-	7450	19	novel_not_in_catalog	ENSSSCG00025005869	novel	5794	21	NA	NA	13	1	intron_retention	FALSE	non_canonical	NA	NA	NA	NA	NA	NA	NA	TRUE	NA	NA	NA	A	coding	878	2637	246	2882	683707	655171	TRUE	10	ACTGGCCGTGTCCACTTGTG	NA	NA	NA	NA	AATAAA	-17_x000D_
PB.5488.2	LUXX01001166.1	-	2459	1	incomplete-splice_match	ENSSSCG00025006243	ENSSSCT00025008814	8081	26	150026	1083	150026	1	mono-exon	FALSE	NA	NA	NA	NA	NA	NA	NA	NA	NA	NA	NA	NA	B	coding	140	423	1103	1525	719144	718722	NA	80	AAGGAAAAAAAAAAAAAAGC	NA	NA	NA	NA	AAAAAG	-3_x000D_
PB.5488.3	LUXX01001166.1	-	3951	26	incomplete-splice_match	ENSSSCG00025006243	ENSSSCT00025008866	7521	27	-13	3649	0	-28	3prime_fragment	FALSE	canonical	NA	NA	NA	NA	NA	NA	NA	TRUE	NA	NA	NA	B	coding	1197	3594	15	3608	870272	721781	FALSE	90	AAAAAAAAAAACAAAAAACA	NA	NA	NA	NA	NA	NA_x000D_
PB.5489.1	LUXX01001166.1	-	4693	13	novel_in_catalog	ENSSSCG00025006815	novel	4764	14	NA	NA	21	0	combination_of_known_splicesites	FALSE	canonical	NA	NA	NA	NA	NA	NA	NA	TRUE	NA	NA	NA	A	coding	781	2346	104	2449	923325	889793	FALSE	10	AGCTCCTGAGGTCTTTTGTC	NA	NA	NA	NA	AATAAA	-19_x000D_
PB.5490.1	LUXX01001166.1	+	838	1	antisense	novelGene_ENSSSCG00025006837_AS	novel	NA	NA	NA	NA	NA	NA	mono-exon	FALSE	NA	NA	NA	NA	NA	NA	NA	NA	NA	NA	NA	NA	A	non_coding	NA	NA	NA	NA	NA	NA	NA	80	AAAAAAGACAAAAGACAAAA	NA	NA	NA	NA	NA	NA_x000D_
PB.5491.1	LUXX01001166.1	-	1973	2	antisense	novelGene_ENSSSCG00025007063_AS	novel	NA	NA	NA	NA	NA	NA	multi-exon	TRUE	canonical	NA	NA	NA	NA	NA	NA	NA	FALSE	NA	NA	NA	A	non_coding	NA	NA	NA	NA	NA	NA	NA	90	AAAAAAAAAAAAAAAAGACA	NA	NA	NA	NA	NA	NA_x000D_
PB.5492.1	LUXX01001166.1	-	1951	11	full-splice_match	ENSSSCG00025007122	ENSSSCT00025009471	3319	11	5	1363	5	-1363	multi-exon	FALSE	canonical	NA	NA	NA	NA	NA	NA	NA	TRUE	NA	NA	NA	A	coding	484	1455	5	1459	1334221	1330635	FALSE	25	ATCTGGAGATGAGCACGTGG	NA	NA	NA	NA	AATAAA	-21_x000D_
PB.5493.1	LUXX01001166.1	+	2433	4	novel_in_catalog	ENSSSCG00025007185	novel	2506	5	NA	NA	-14	4	combination_of_known_junctions	TRUE	canonical	NA	NA	NA	NA	NA	NA	NA	TRUE	NA	NA	NA	B	coding	408	1227	185	1411	1357781	1397290	FALSE	25	CACGTGCATAGTCCACTTCA	NA	NA	NA	NA	AATAAA	-25_x000D_
PB.5493.2	LUXX01001166.1	+	2282	4	novel_in_catalog	ENSSSCG00025007185	novel	2506	5	NA	NA	23	-108	combination_of_known_junctions	FALSE	canonical	NA	NA	NA	NA	NA	NA	NA	TRUE	NA	NA	NA	B	coding	408	1227	146	1372	1357781	1397290	FALSE	45	AAAAAATAGAATGCGTGTGT	NA	NA	NA	NA	TATAAA	-10_x000D_
PB.7013.1	LUXX01001285.1	+	2190	4	incomplete-splice_match	ENSSSCG00025007364	ENSSSCT00025009797	2261	5	111	1	-29	-1	intron_retention	FALSE	canonical	NA	NA	NA	NA	NA	NA	NA	TRUE	NA	NA	NA	A	coding	102	309	114	422	286508	358447	FALSE	0	CTCCTGGTTTGTTTCTTCTC	NA	NA	NA	NA	AATAAA	-16_x000D_
PB.7413.1	LUXX01001377.1	-	1877	6	full-splice_match	ENSSSCG00025007716	ENSSSCT00025010261	1930	6	52	1	-1	-1	multi-exon	FALSE	canonical	NA	NA	NA	NA	NA	NA	NA	TRUE	NA	NA	NA	C	coding	326	981	192	1172	162672	127293	FALSE	10	ATGCTGGTTTTTCCATGTGT	NA	NA	NA	NA	AATAAA	-14_x000D_
PB.7413.2	LUXX01001377.1	-	1353	6	full-splice_match	ENSSSCG00025007716	ENSSSCT00025010261	1930	6	52	525	-1	-522	multi-exon	FALSE	canonical	NA	NA	NA	NA	NA	NA	NA	TRUE	NA	NA	NA	C	coding	326	981	192	1172	162672	127293	FALSE	50	AAAAGAAACCTGTTATCTAA	NA	NA	NA	NA	AAGAAA	-34_x000D_
PB.2412.1	LUXX01001392.1	-	2146	4	full-splice_match	ENSSSCG00025007996	ENSSSCT00025010643	778	4	12	-1380	-10	1380	multi-exon	FALSE	canonical	NA	NA	NA	NA	NA	NA	NA	TRUE	NA	NA	NA	A	coding	231	696	29	724	1062775	986512	FALSE	25	ACATGCGTGTGCGAGTATCA	NA	NA	NA	NA	AATAAA	-23_x000D_
PB.2413.1	LUXX01001392.1	+	1569	12	incomplete-splice_match	ENSSSCG00025005324	ENSSSCT00025007164	2857	18	215555	19	215555	-19	5prime_fragment	FALSE	canonical	NA	NA	NA	NA	NA	NA	NA	TRUE	NA	NA	NA	A	coding	366	1101	105	1205	3399258	3422938	FALSE	85	AAAAAGAAAAAAAGAAAAAT	NA	NA	NA	NA	AAAACA	-25_x000D_
PB.2414.1	LUXX01001392.1	-	682	2	incomplete-splice_match	ENSSSCG00025005350	ENSSSCT00025007190	1633	9	20071	-5	20071	5	5prime_fragment	FALSE	canonical	NA	NA	NA	NA	NA	NA	NA	TRUE	NA	NA	NA	A	coding	75	228	121	348	3443975	3429913	FALSE	15	TAGGGGGTGCTCTTGAGTGA	NA	NA	NA	NA	NA	NA_x000D_
PB.5576.1	LUXX01001765.1	-	3273	8	incomplete-splice_match	ENSSSCG00025001231	ENSSSCT00025001581	2329	12	20	8403	8	237	3prime_fragment	FALSE	canonical	NA	NA	NA	NA	NA	NA	NA	TRUE	NA	NA	NA	B	coding	208	627	425	1051	111046	51539	FALSE	75	AAATAAACACAAAAGAAAAC	NA	NA	NA	NA	AATAAA	-26_x000D_
PB.5576.2	LUXX01001765.1	-	3226	8	incomplete-splice_match	ENSSSCG00025001231	ENSSSCT00025001581	2329	12	-168	8638	-101	2	3prime_fragment	FALSE	canonical	NA	NA	NA	NA	NA	NA	NA	TRUE	NA	NA	NA	B	coding	208	627	613	1239	111046	51539	FALSE	25	AGATGGGTCATATTCTTTAT	NA	NA	NA	NA	AATAAA	-18_x000D_
PB.5576.3	LUXX01001765.1	-	3149	10	novel_not_in_catalog	ENSSSCG00025001231	novel	3364	9	NA	NA	4	2	intron_retention	FALSE	canonical	NA	NA	NA	NA	NA	NA	NA	TRUE	NA	NA	NA	B	coding	121	366	797	1162	68101	51539	FALSE	25	AGATGGGTCATATTCTTTAT	NA	NA	NA	NA	AATAAA	-18_x000D_
PB.5576.5	LUXX01001765.1	-	2350	8	incomplete-splice_match	ENSSSCG00025001231	ENSSSCT00025001581	2329	12	-47	9393	20	-750	3prime_fragment	FALSE	canonical	NA	NA	NA	NA	NA	NA	NA	TRUE	NA	NA	NA	B	coding	208	627	492	1118	111046	51539	FALSE	15	TATGCCTTATTTTTCAGCTT	NA	NA	NA	NA	AATAAA	-20_x000D_
PB.5577.1	LUXX01001765.1	+	973	8	full-splice_match	ENSSSCG00025001458	ENSSSCT00025001918	2713	8	-6	1746	-6	1082	multi-exon	FALSE	canonical	NA	NA	NA	NA	NA	NA	NA	TRUE	NA	NA	NA	A	coding	212	639	112	750	134794	179514	FALSE	10	ACACGTGTGTGTGTGTGTGT	NA	NA	NA	NA	AATAAA	-14_x000D_
PB.5578.1	LUXX01001765.1	+	1582	12	incomplete-splice_match	ENSSSCG00025002001	ENSSSCT00025002845	6046	14	-16	8333	-5	0	3prime_fragment	TRUE	canonical	NA	NA	NA	NA	NA	NA	NA	TRUE	NA	NA	NA	A	coding	392	1179	29	1207	194148	247465	FALSE	40	AATTTGAGAAACTTTGTTAA	NA	NA	NA	NA	AATAAA	-19_x000D_
PB.5579.1	LUXX01001765.1	-	1658	8	novel_in_catalog	ENSSSCG00025002336	novel	1699	8	NA	NA	2	6	combination_of_known_junctions	FALSE	canonical	NA	NA	NA	NA	NA	NA	NA	TRUE	NA	NA	NA	A	coding	309	930	422	1351	276758	273917	FALSE	10	TCCTCTCTCTCTGTTACCAG	NA	NA	NA	NA	CATAAA	-21_x000D_
PB.5580.1	LUXX01001765.1	+	2613	14	incomplete-splice_match	ENSSSCG00025002905	ENSSSCT00025003811	2371	15	-139	2	-139	2	intron_retention	FALSE	canonical	NA	NA	NA	NA	NA	NA	NA	TRUE	NA	NA	NA	B	coding	356	1071	342	1412	427337	520233	FALSE	5	TATCCGGTTTTTCTCTCTGG	NA	NA	NA	NA	AATAAA	-19_x000D_
PB.5580.2	LUXX01001765.1	+	1751	14	incomplete-splice_match	ENSSSCG00025002905	ENSSSCT00025003811	2371	15	7	718	7	1	intron_retention	FALSE	canonical	NA	NA	NA	NA	NA	NA	NA	TRUE	NA	NA	NA	B	coding	356	1071	196	1266	427337	520233	FALSE	10	ACCTTTGTGTCCCAGTCTTG	NA	NA	NA	NA	AATAAA	-13_x000D_
PB.5581.1	LUXX01001765.1	-	2232	13	full-splice_match	ENSSSCG00025003037	ENSSSCT00025004039	2265	13	33	0	33	0	multi-exon	FALSE	canonical	NA	NA	NA	NA	NA	NA	NA	TRUE	NA	NA	NA	A	coding	544	1635	27	1661	584094	544176	FALSE	45	AAAAAGGCGGAGTATAATGT	NA	NA	NA	NA	NA	NA_x000D_
PB.5582.1	LUXX01001765.1	+	1406	5	novel_not_in_catalog	ENSSSCG00025003871	novel	1572	5	NA	NA	15	-1	at_least_one_novel_splicesite	TRUE	non_canonical	NA	NA	NA	NA	NA	NA	NA	TRUE	NA	NA	NA	B	coding	226	681	19	699	1205971	1229467	FALSE	50	GAAAAAAATGGAGTCATAGT	NA	NA	NA	NA	AATAAA	-15_x000D_
PB.5582.2	LUXX01001765.1	+	1269	5	novel_not_in_catalog	ENSSSCG00025003871	novel	1572	5	NA	NA	26	-127	at_least_one_novel_splicesite	FALSE	non_canonical	NA	NA	NA	NA	NA	NA	NA	TRUE	NA	NA	NA	B	coding	226	681	8	688	1205971	1229467	FALSE	15	ATTTTTAGTTTTATCTTGTC	NA	NA	NA	NA	ATTAAA	-13_x000D_
PB.7523.1	LUXX01001769.1	-	3491	3	full-splice_match	ENSSSCG00025004201	ENSSSCT00025005567	3499	3	6	2	6	-2	multi-exon	FALSE	canonical	NA	NA	NA	NA	NA	NA	NA	TRUE	NA	NA	NA	C	coding	244	735	207	941	23626	22892	FALSE	10	AAGTTTCTGCTTCTGTCCTC	NA	NA	NA	NA	ATTAAA	-15_x000D_
PB.7523.2	LUXX01001769.1	-	2298	3	full-splice_match	ENSSSCG00025004201	ENSSSCT00025005567	3499	3	8	1193	8	-1193	multi-exon	FALSE	canonical	NA	NA	NA	NA	NA	NA	NA	TRUE	NA	NA	NA	C	coding	244	735	205	939	23626	22892	FALSE	80	AAAAAAAAAAATAAACCAAC	NA	NA	NA	NA	NA	NA_x000D_
PB.4537.1	LUXX01001805.1	+	3129	15	novel_in_catalog	ENSSSCG00025004505	novel	3239	15	NA	NA	-53	0	combination_of_known_junctions	FALSE	canonical	NA	NA	NA	NA	NA	NA	NA	TRUE	NA	NA	NA	A	coding	559	1680	61	1740	193270	220307	FALSE	0	TGTTTCTTTTTTTTTTTTTT	NA	NA	NA	NA	ATTAAA	-15_x000D_
PB.4538.1	LUXX01001805.1	-	3544	1	incomplete-splice_match	ENSSSCG00025004538	ENSSSCT00025006088	6274	10	52283	9	52268	6	mono-exon	FALSE	NA	NA	NA	NA	NA	NA	NA	NA	NA	NA	NA	NA	B	non_coding	NA	NA	NA	NA	NA	NA	NA	25	ATTCAAGGCCACCTTGATTG	NA	NA	NA	NA	AATAAA	-20_x000D_
PB.4538.2	LUXX01001805.1	-	3935	1	incomplete-splice_match	ENSSSCG00025004538	ENSSSCT00025006088	6274	10	51887	14	51872	1	mono-exon	FALSE	NA	NA	NA	NA	NA	NA	NA	NA	NA	NA	NA	NA	B	non_coding	NA	NA	NA	NA	NA	NA	NA	25	ATTTGATTCAAGGCCACCTT	NA	NA	NA	NA	AATAAA	-15_x000D_
PB.4539.1	LUXX01001805.1	+	1906	10	incomplete-splice_match	ENSSSCG00025004550	ENSSSCT00025006121	6667	13	-3	14378	-3	-1	3prime_fragment	FALSE	canonical	NA	NA	NA	NA	NA	NA	NA	TRUE	NA	NA	NA	A	coding	501	1506	12	1517	317990	338200	FALSE	20	ACACCCGGAGAGCTGTTTTC	NA	NA	NA	NA	AATAAA	-19_x000D_
PB.4540.1	LUXX01001805.1	+	2803	7	incomplete-splice_match	ENSSSCG00025004575	ENSSSCT00025006156	5077	8	381	1961	-72	29	5prime_fragment	FALSE	canonical	NA	NA	NA	NA	NA	NA	NA	TRUE	NA	NA	NA	B	coding	183	552	67	618	397195	506046	FALSE	65	AAAAAAAAATAATGTCCAGA	NA	NA	NA	NA	TATAAA	-24_x000D_
PB.4540.2	LUXX01001805.1	+	4759	7	incomplete-splice_match	ENSSSCG00025004575	ENSSSCT00025006156	5077	8	398	-12	-55	0	5prime_fragment	FALSE	canonical	NA	NA	NA	NA	NA	NA	NA	TRUE	NA	NA	NA	B	coding	183	552	50	601	397195	506046	FALSE	25	GCAAATGTCTGGACCTTGAT	NA	NA	NA	NA	AATAAA	-17_x000D_
PB.4541.1	LUXX01001805.1	-	2171	1	antisense	novelGene_ENSSSCG00025004575_AS	novel	NA	NA	NA	NA	NA	NA	mono-exon	FALSE	NA	NA	NA	NA	NA	NA	NA	NA	NA	NA	NA	NA	A	non_coding	NA	NA	NA	NA	NA	NA	NA	95	AAAAAAAAAAAAAAAAGAAA	NA	NA	NA	NA	AAAAAG	-40_x000D_
PB.4542.1	LUXX01001805.1	-	2739	10	incomplete-splice_match	ENSSSCG00025001200	ENSSSCT00025001482	3464	12	18704	0	18704	0	5prime_fragment	FALSE	canonical	NA	NA	NA	NA	NA	NA	NA	TRUE	NA	NA	NA	A	coding	497	1494	134	1627	1028859	1021006	FALSE	20	TAAACTCTGAGTCTGCTGCT	NA	NA	NA	NA	AATAAA	-12_x000D_
PB.4543.1	LUXX01001805.1	+	4296	23	novel_in_catalog	ENSSSCG00025001559	novel	4393	24	NA	NA	-28	-2	combination_of_known_junctions	TRUE	canonical	NA	NA	NA	NA	NA	NA	NA	TRUE	NA	NA	NA	B	coding	923	2772	358	3129	1141963	1239115	TRUE	20	AATCAGTGTTTGTTTGTACT	NA	NA	NA	NA	AATAAA	-13_x000D_
PB.4543.2	LUXX01001805.1	+	3445	23	novel_in_catalog	ENSSSCG00025001559	novel	4393	24	NA	NA	-11	-836	combination_of_known_junctions	FALSE	canonical	NA	NA	NA	NA	NA	NA	NA	TRUE	NA	NA	NA	B	coding	923	2772	341	3112	1141963	1239115	TRUE	25	TGAAACATTCTCCTGGTAGC	NA	NA	NA	NA	AATAAA	-16_x000D_
PB.4543.3	LUXX01001805.1	+	3143	23	novel_in_catalog	ENSSSCG00025001559	novel	4393	24	NA	NA	16	-1111	combination_of_known_junctions	FALSE	canonical	NA	NA	NA	NA	NA	NA	NA	TRUE	NA	NA	NA	B	coding	923	2772	314	3085	1141963	1239115	TRUE	65	AAGAAAACAAAAACCAGACT	NA	NA	NA	NA	NA	NA_x000D_
PB.4543.4	LUXX01001805.1	+	3348	23	novel_in_catalog	ENSSSCG00025001559	novel	4393	24	NA	NA	-7	-727	combination_of_known_junctions	FALSE	canonical	NA	NA	NA	NA	NA	NA	NA	TRUE	NA	NA	NA	B	coding	923	2772	135	2906	1141963	1239115	TRUE	45	AAACGAGAGCATTTAACTTA	NA	NA	NA	NA	AATAAA	-18_x000D_
PB.4544.1	LUXX01001805.1	-	670	2	full-splice_match	ENSSSCG00025002159	ENSSSCT00025002763	692	2	23	-1	23	1	multi-exon	FALSE	canonical	NA	NA	NA	NA	NA	NA	NA	TRUE	NA	NA	NA	A	coding	119	360	55	414	1325968	1323415	FALSE	10	AGTTCCTGTCGTGGCTCAGT	NA	NA	NA	NA	ATTAAA	-14_x000D_
PB.4545.1	LUXX01001805.1	-	4946	27	incomplete-splice_match	ENSSSCG00025002464	ENSSSCT00025003295	9187	49	16241	1	16241	-1	5prime_fragment	FALSE	canonical	NA	NA	NA	NA	NA	NA	NA	TRUE	NA	NA	NA	A	coding	1325	3978	256	4233	1340167	1329839	FALSE	10	AGAGGCTTGGCTGTGTCTTG	NA	NA	NA	NA	AATAAA	-15_x000D_
PB.4546.1	LUXX01001805.1	-	3332	7	novel_in_catalog	ENSSSCG00025003520	novel	3505	8	NA	NA	-9	-1	combination_of_known_junctions	FALSE	canonical	NA	NA	NA	NA	NA	NA	NA	TRUE	NA	NA	NA	B	coding	315	948	75	1022	1432585	1413605	FALSE	15	ATCGTGGGGTATGTATGTCC	NA	NA	NA	NA	AATAAA	-14_x000D_
PB.4546.11	LUXX01001805.1	-	2405	7	novel_in_catalog	ENSSSCG00025003520	novel	3505	8	NA	NA	-9	-926	combination_of_known_junctions	FALSE	canonical	NA	NA	NA	NA	NA	NA	NA	TRUE	NA	NA	NA	B	coding	315	948	75	1022	1432585	1413605	FALSE	65	AAAAAAAAGAAAGTTTATCA	NA	NA	NA	NA	NA	NA_x000D_
PB.4546.12	LUXX01001805.1	-	1474	8	novel_not_in_catalog	ENSSSCG00025003520	novel	3505	8	NA	NA	-9	1135	at_least_one_novel_splicesite	FALSE	canonical	NA	NA	NA	NA	NA	NA	NA	TRUE	NA	NA	NA	B	coding	315	948	75	1022	1432585	1413605	TRUE	15	AGACCCTCCTAGTGTCGTGG	NA	NA	NA	NA	AATAAA	-33_x000D_
PB.4546.14	LUXX01001805.1	-	2066	7	novel_in_catalog	ENSSSCG00025003520	novel	3505	8	NA	NA	-3	1123	combination_of_known_junctions	FALSE	canonical	NA	NA	NA	NA	NA	NA	NA	TRUE	NA	NA	NA	B	coding	315	948	69	1016	1432585	1413605	FALSE	35	AAGTGAAAGCTTAGACCCTC	NA	NA	NA	NA	AATAAA	-21_x000D_
PB.4546.15	LUXX01001805.1	-	1775	7	novel_in_catalog	ENSSSCG00025003520	novel	3505	8	NA	NA	-9	826	combination_of_known_junctions	FALSE	canonical	NA	NA	NA	NA	NA	NA	NA	TRUE	NA	NA	NA	B	coding	315	948	75	1022	1432585	1413605	FALSE	55	AGAAACAGCTAGAAAACTGA	NA	NA	NA	NA	NA	NA_x000D_
PB.4546.16	LUXX01001805.1	-	1444	7	novel_in_catalog	ENSSSCG00025003520	novel	3505	8	NA	NA	-3	501	combination_of_known_junctions	FALSE	canonical	NA	NA	NA	NA	NA	NA	NA	TRUE	NA	NA	NA	B	coding	315	948	69	1016	1432585	1413605	FALSE	45	AGAAGGGAAGAAATAGTCCC	NA	NA	NA	NA	AATAAA	-18_x000D_
PB.4546.2	LUXX01001805.1	-	3192	6	incomplete-splice_match	ENSSSCG00025003520	ENSSSCT00025004715	5271	7	3096	1	3096	-1	5prime_fragment	FALSE	canonical	NA	NA	NA	NA	NA	NA	NA	TRUE	NA	NA	NA	B	coding	241	726	157	882	1426677	1413605	FALSE	15	ATCGTGGGGTATGTATGTCC	NA	NA	NA	NA	AATAAA	-14_x000D_
PB.4546.7	LUXX01001805.1	-	2612	8	novel_not_in_catalog	ENSSSCG00025003520	novel	3505	8	NA	NA	-9	-1	at_least_one_novel_splicesite	FALSE	non_canonical	NA	NA	NA	NA	NA	NA	NA	TRUE	NA	NA	NA	B	coding	315	948	75	1022	1432585	1413605	TRUE	15	ATCGTGGGGTATGTATGTCC	NA	NA	NA	NA	AATAAA	-14_x000D_
PB.4547.1	LUXX01001805.1	-	1091	2	full-splice_match	ENSSSCG00025003756	ENSSSCT00025004943	1072	2	-13	-6	-13	6	multi-exon	FALSE	canonical	NA	NA	NA	NA	NA	NA	NA	TRUE	NA	NA	NA	A	coding	71	216	215	430	1516192	1515977	FALSE	5	TCTTGTTGACTTCTGCCCTT	NA	NA	NA	NA	AATAAA	-21_x000D_
PB.4548.1	LUXX01001805.1	+	2510	15	full-splice_match	ENSSSCG00025003875	ENSSSCT00025005248	2509	15	0	-1	0	1	multi-exon	FALSE	canonical	NA	NA	NA	NA	NA	NA	NA	TRUE	NA	NA	NA	C	coding	571	1716	63	1778	1550430	1566083	FALSE	5	CTCTGCGATCCCGTCTCTGT	NA	NA	NA	NA	AATAAA	-18_x000D_
PB.4548.2	LUXX01001805.1	+	2376	14	incomplete-splice_match	ENSSSCG00025003875	ENSSSCT00025005248	2509	15	4501	-2	4501	2	5prime_fragment	FALSE	canonical	NA	NA	NA	NA	NA	NA	NA	TRUE	NA	NA	NA	C	coding	514	1545	99	1643	1554967	1566083	FALSE	5	TCTGCGATCCCGTCTCTGTC	NA	NA	NA	NA	AATAAA	-19_x000D_
PB.4549.1	LUXX01001805.1	+	2765	19	novel_in_catalog	ENSSSCG00025004156	novel	2597	20	NA	NA	-24	2	combination_of_known_junctions	FALSE	canonical	NA	NA	NA	NA	NA	NA	NA	TRUE	NA	NA	NA	A	coding	755	2268	132	2399	1604705	1639119	FALSE	30	TTTCGAGTAACAGACTCATT	NA	NA	NA	NA	TTTAAA	-18_x000D_
PB.4550.1	LUXX01001805.1	-	1752	10	novel_in_catalog	ENSSSCG00025004388	novel	1842	14	NA	NA	37073	2	intron_retention	FALSE	canonical	NA	NA	NA	NA	NA	NA	NA	TRUE	NA	NA	NA	A	coding	310	933	275	1207	1846766	1832412	FALSE	15	AGCCCTTTTGGTTATGATGG	NA	NA	NA	NA	AATAAA	-19_x000D_
PB.7357.1	LUXX01002035.1	+	2825	1	novel_in_catalog	ENSSSCG00025004646	novel	2115	18	NA	NA	-5	-5824	mono-exon_by_intron_retention	FALSE	NA	NA	NA	NA	NA	NA	NA	NA	NA	NA	NA	NA	B	non_coding	NA	NA	NA	NA	NA	NA	NA	90	GAAAAAAAAAAAAAACAAAA	NA	NA	NA	NA	NA	NA_x000D_
PB.7357.2	LUXX01002035.1	+	2017	16	novel_in_catalog	ENSSSCG00025004646	novel	2076	17	NA	NA	-5	0	combination_of_known_junctions	FALSE	canonical	NA	NA	NA	NA	NA	NA	NA	TRUE	NA	NA	NA	B	coding	357	1074	121	1194	9145	15161	FALSE	15	AGCACTATTCTTCTTCTTTG	NA	NA	NA	NA	AATAAA	-16_x000D_
PB.7357.3	LUXX01002035.1	+	2773	15	novel_in_catalog	ENSSSCG00025004646	novel	2076	17	NA	NA	0	0	intron_retention	FALSE	canonical	NA	NA	NA	NA	NA	NA	NA	TRUE	NA	NA	NA	B	coding	284	855	1096	1950	10401	15161	FALSE	15	AGCACTATTCTTCTTCTTTG	NA	NA	NA	NA	AATAAA	-16_x000D_
PB.7357.4	LUXX01002035.1	+	1596	11	incomplete-splice_match	ENSSSCG00025004646	ENSSSCT00025006289	2076	17	3316	0	3316	0	5prime_fragment	FALSE	canonical	NA	NA	NA	NA	NA	NA	NA	TRUE	NA	NA	NA	B	coding	245	738	36	773	10698	15161	FALSE	15	AGCACTATTCTTCTTCTTTG	NA	NA	NA	NA	AATAAA	-16_x000D_
PB.7358.1	LUXX01002035.1	-	1562	2	novel_in_catalog	ENSSSCG00025004731	novel	1724	3	NA	NA	8	-4	intron_retention	FALSE	canonical	NA	NA	NA	NA	NA	NA	NA	TRUE	NA	NA	NA	A	coding	147	444	344	787	141902	141459	FALSE	30	AAAAGACGATGTTCTTCTGT	NA	NA	NA	NA	AATAAA	-24_x000D_
PB.5660.1	LUXX01002164.1	-	4073	2	novel_not_in_catalog	ENSSSCG00025000767	novel	5169	6	NA	NA	243967	-25	at_least_one_novel_splicesite	FALSE	canonical	NA	NA	NA	NA	NA	NA	NA	TRUE	NA	NA	NA	B	coding	893	2682	207	2888	38348	35667	FALSE	95	TAAAAAAAAAAAAAAAAAAA	NA	NA	NA	NA	AAGAAA	-15_x000D_
PB.5660.10	LUXX01002164.1	-	3152	2	novel_not_in_catalog	ENSSSCG00025000767	novel	5169	6	NA	NA	243970	-943	at_least_one_novel_splicesite	FALSE	canonical	NA	NA	NA	NA	NA	NA	NA	TRUE	NA	NA	NA	B	coding	893	2682	204	2885	38348	35667	FALSE	40	CATAACTCACATTAATTTGA	NA	NA	NA	NA	TATAAA	-25_x000D_
PB.5660.11	LUXX01002164.1	-	1038	2	novel_not_in_catalog	ENSSSCG00025000767	novel	5169	6	NA	NA	243940	-3087	at_least_one_novel_splicesite	FALSE	canonical	NA	NA	NA	NA	NA	NA	NA	TRUE	NA	NA	NA	B	coding	268	804	234	1037	38348	37545	FALSE	70	AAAAACTAAAGCAAACAGAA	NA	NA	NA	NA	AAAACA	-41_x000D_
PB.5660.12	LUXX01002164.1	-	860	2	novel_not_in_catalog	ENSSSCG00025000767	novel	5169	6	NA	NA	243938	-3267	at_least_one_novel_splicesite	FALSE	canonical	NA	NA	NA	NA	NA	NA	NA	TRUE	NA	NA	NA	B	coding	208	624	236	859	38348	37725	FALSE	60	AAAAAGAAAGGATGACTACA	NA	NA	NA	NA	NA	NA_x000D_
PB.5660.13	LUXX01002164.1	-	2410	1	intergenic	novelGene_441	novel	NA	NA	NA	NA	NA	NA	mono-exon	FALSE	NA	NA	NA	NA	NA	NA	NA	NA	NA	NA	NA	NA	A	non_coding	NA	NA	NA	NA	NA	NA	NA	60	AAAAAAAAAAATACTGCCTC	NA	NA	NA	NA	AATAGA	-2_x000D_
PB.5660.2	LUXX01002164.1	-	3587	2	novel_not_in_catalog	ENSSSCG00025000767	novel	5169	6	NA	NA	243969	-509	at_least_one_novel_splicesite	FALSE	canonical	NA	NA	NA	NA	NA	NA	NA	TRUE	NA	NA	NA	B	coding	893	2682	205	2886	38348	35667	FALSE	35	TATGAGCACATATGAGCTGA	NA	NA	NA	NA	AATAAA	-23_x000D_
PB.5660.4	LUXX01002164.1	-	3505	3	novel_not_in_catalog	ENSSSCG00025000767	novel	5169	6	NA	NA	243970	-673	at_least_one_novel_splicesite	FALSE	canonical	NA	NA	NA	NA	NA	NA	NA	TRUE	NA	NA	NA	B	coding	893	2682	287	2968	38348	35667	FALSE	40	ATCTCAGAGTTAACTATAAC	NA	NA	NA	NA	AATAAA	-21_x000D_
PB.5660.5	LUXX01002164.1	-	3425	2	novel_not_in_catalog	ENSSSCG00025000767	novel	5169	6	NA	NA	243967	-673	at_least_one_novel_splicesite	FALSE	canonical	NA	NA	NA	NA	NA	NA	NA	TRUE	NA	NA	NA	B	coding	893	2682	207	2888	38348	35667	FALSE	40	ATCTCAGAGTTAACTATAAC	NA	NA	NA	NA	AATAAA	-21_x000D_
PB.5660.6	LUXX01002164.1	-	3313	2	novel_not_in_catalog	ENSSSCG00025000767	novel	5169	6	NA	NA	243967	-785	at_least_one_novel_splicesite	FALSE	canonical	NA	NA	NA	NA	NA	NA	NA	TRUE	NA	NA	NA	B	coding	893	2682	207	2888	38348	35667	FALSE	25	TCATAGTGTCTTAATTCTTA	NA	NA	NA	NA	AATAGA	-15_x000D_
PB.5660.9	LUXX01002164.1	-	3318	3	novel_not_in_catalog	ENSSSCG00025000767	novel	5169	6	NA	NA	243967	-863	at_least_one_novel_splicesite	FALSE	canonical	NA	NA	NA	NA	NA	NA	NA	TRUE	NA	NA	NA	B	coding	893	2682	290	2971	38348	35667	FALSE	15	ATTGCTTGCTGAATTTTTTT	NA	NA	NA	NA	AGTAAA	-15_x000D_
PB.5661.1	LUXX01002164.1	+	3839	19	novel_in_catalog	ENSSSCG00025001020	novel	3986	20	NA	NA	43	1	combination_of_known_junctions	FALSE	canonical	NA	NA	NA	NA	NA	NA	NA	TRUE	NA	NA	NA	B	coding	700	2103	162	2264	472875	535258	FALSE	20	AAAACTTTGTTCTTTTTTTT	NA	NA	NA	NA	AATAAA	-17_x000D_
PB.5661.2	LUXX01002164.1	+	2075	18	novel_in_catalog	ENSSSCG00025001020	novel	3986	20	NA	NA	70	-2529	combination_of_known_junctions	FALSE	canonical	NA	NA	NA	NA	NA	NA	NA	TRUE	NA	NA	NA	B	coding	647	1941	135	2075	472875	534301	FALSE	55	AAAAAAAAACATCCTGAGTT	NA	NA	NA	NA	ACTAAA	-23_x000D_
PB.5661.3	LUXX01002164.1	+	3646	19	novel_not_in_catalog	ENSSSCG00025001020	novel	3986	20	NA	NA	197	1	at_least_one_novel_splicesite	FALSE	canonical	NA	NA	NA	NA	NA	NA	NA	TRUE	NA	NA	NA	B	coding	687	2064	8	2071	472875	535258	FALSE	20	AAAACTTTGTTCTTTTTTTT	NA	NA	NA	NA	AATAAA	-17_x000D_
PB.5662.1	LUXX01002164.1	+	1662	10	full-splice_match	ENSSSCG00025001129	ENSSSCT00025001391	2193	10	-17	548	-17	-3	multi-exon	FALSE	canonical	NA	NA	NA	NA	NA	NA	NA	TRUE	NA	NA	NA	A	coding	283	852	37	888	549135	570157	FALSE	20	AGACTTTGGTTATGTATTTT	NA	NA	NA	NA	AATAAA	-12_x000D_
PB.5663.1	LUXX01002164.1	-	1953	12	incomplete-splice_match	ENSSSCG00025001300	ENSSSCT00025001732	3268	13	676	1326	319	-1326	3prime_fragment	FALSE	canonical	NA	NA	NA	NA	NA	NA	NA	TRUE	NA	NA	NA	A	coding	501	1506	147	1652	624185	578180	FALSE	10	TGATTTGACTTTTTTTCTTG	NA	NA	NA	NA	AATAAA	-14_x000D_
PB.5664.1	LUXX01002164.1	+	1571	6	full-splice_match	ENSSSCG00025001513	ENSSSCT00025001900	1593	6	26	-4	26	4	multi-exon	FALSE	canonical	NA	NA	NA	NA	NA	NA	NA	TRUE	NA	NA	NA	A	coding	275	828	314	1141	763078	784137	FALSE	20	AGATCTTTGTTTTAGTTATT	NA	NA	NA	NA	AATAAA	-31_x000D_
PB.5665.1	LUXX01002164.1	+	1907	8	incomplete-splice_match	ENSSSCG00025001911	ENSSSCT00025002501	4350	9	0	2516	0	1	3prime_fragment	TRUE	canonical	NA	NA	NA	NA	NA	NA	NA	TRUE	NA	NA	NA	B	coding	401	1206	270	1475	883984	914290	FALSE	30	ATTAATGGTCTTGTAATTTA	NA	NA	NA	NA	AATAAA	-14_x000D_
PB.5665.2	LUXX01002164.1	+	3186	8	incomplete-splice_match	ENSSSCG00025001911	ENSSSCT00025002501	4350	9	35	1202	35	-1202	3prime_fragment	FALSE	canonical	NA	NA	NA	NA	NA	NA	NA	TRUE	NA	NA	NA	B	coding	401	1206	235	1440	883984	914290	FALSE	35	ATTAGATTTTAAACTTTTAT	NA	NA	NA	NA	AATAAA	-19_x000D_
PB.5665.3	LUXX01002164.1	+	1860	8	novel_in_catalog	ENSSSCG00025001911	novel	2113	9	NA	NA	35	2	combination_of_known_splicesites	FALSE	canonical	NA	NA	NA	NA	NA	NA	NA	TRUE	NA	NA	NA	B	coding	396	1191	235	1425	883984	914290	FALSE	30	AATGGTCTTGTAATTTAATT	NA	NA	NA	NA	AATAAA	-17_x000D_
PB.5665.4	LUXX01002164.1	+	1574	8	incomplete-splice_match	ENSSSCG00025001911	ENSSSCT00025002501	4350	9	52	2797	52	-280	3prime_fragment	FALSE	canonical	NA	NA	NA	NA	NA	NA	NA	TRUE	NA	NA	NA	B	coding	401	1206	218	1423	883984	914290	FALSE	85	AAAAAAAAAAAAGACCAAAA	NA	NA	NA	NA	NA	NA_x000D_
PB.7481.1	LUXX01002271.1	-	2704	6	novel_in_catalog	ENSSSCG00025003035	novel	2541	7	NA	NA	-29	-1	intron_retention	FALSE	canonical	NA	NA	NA	NA	NA	NA	NA	TRUE	NA	NA	NA	A	coding	468	1407	239	1645	23866	15016	FALSE	20	AGTCCTGTTATGTTTAAGGT	NA	NA	NA	NA	AATAAA	-15_x000D_
PB.5598.1	LUXX01002421.1	+	2536	8	incomplete-splice_match	ENSSSCG00025004062	ENSSSCT00025005367	2621	9	28	208	-2	-4	intron_retention	FALSE	canonical	NA	NA	NA	NA	NA	NA	NA	TRUE	NA	NA	NA	B	coding	310	933	244	1176	50397	101066	FALSE	40	AAAATTAAGTTTGCTGAATG	NA	NA	NA	NA	ATTAAA	-12_x000D_
PB.5598.2	LUXX01002421.1	+	2387	7	novel_in_catalog	ENSSSCG00025004062	novel	2621	9	NA	NA	27	-4	intron_retention	FALSE	canonical	NA	NA	NA	NA	NA	NA	NA	TRUE	NA	NA	NA	B	coding	270	813	215	1027	50397	101066	FALSE	40	AAAATTAAGTTTGCTGAATG	NA	NA	NA	NA	ATTAAA	-12_x000D_
PB.5598.3	LUXX01002421.1	+	2343	7	novel_in_catalog	ENSSSCG00025004062	novel	2757	8	NA	NA	-10	-5	intron_retention	FALSE	canonical	NA	NA	NA	NA	NA	NA	NA	TRUE	NA	NA	NA	B	coding	296	891	94	984	41363	101066	FALSE	40	TAAAATTAAGTTTGCTGAAT	NA	NA	NA	NA	ATTAAA	-11_x000D_
PB.5599.1	LUXX01002421.1	+	1995	2	full-splice_match	ENSSSCG00025004137	ENSSSCT00025005469	2501	2	44	462	44	-462	multi-exon	FALSE	canonical	NA	NA	NA	NA	NA	NA	NA	TRUE	NA	NA	NA	C	coding	244	735	336	1070	180770	189778	FALSE	5	TTGCTGGCTTGGTTTCATTC	NA	NA	NA	NA	AATAAA	-18_x000D_
PB.5599.2	LUXX01002421.1	+	1250	2	full-splice_match	ENSSSCG00025004137	ENSSSCT00025005469	2501	2	306	945	306	-945	multi-exon	FALSE	canonical	NA	NA	NA	NA	NA	NA	NA	TRUE	NA	NA	NA	C	coding	244	735	74	808	180770	189778	FALSE	25	AAGGAGCACAGGTTTTTTGG	NA	NA	NA	NA	AATAAA	-31_x000D_
PB.5600.1	LUXX01002421.1	-	4536	15	novel_not_in_catalog	ENSSSCG00025004160	novel	5532	16	NA	NA	-13215	-25616	at_least_one_novel_splicesite	FALSE	non_canonical	NA	NA	NA	NA	NA	NA	NA	TRUE	NA	NA	NA	B	coding	368	1107	738	1844	247340	233307	FALSE	40	AATAACCATTATTACTTGAG	NA	NA	NA	NA	AATAAA	-25_x000D_
PB.5600.2	LUXX01002421.1	-	4217	14	novel_not_in_catalog	ENSSSCG00025004160	novel	5532	16	NA	NA	-13207	-32049	at_least_one_novel_splicesite	FALSE	non_canonical	NA	NA	NA	NA	NA	NA	NA	TRUE	NA	NA	NA	B	coding	361	1086	730	1815	247340	239450	FALSE	15	AATTTGGTTTCCTGGGTATT	NA	NA	NA	NA	ATTAAA	-19_x000D_
PB.5601.1	LUXX01002421.1	-	3600	15	incomplete-splice_match	ENSSSCG00025004380	ENSSSCT00025005878	3814	16	273	-9	273	3	5prime_fragment	TRUE	canonical	NA	NA	NA	NA	NA	NA	NA	TRUE	NA	NA	NA	A	coding	502	1509	388	1896	383555	322245	FALSE	5	GTCTGATTTCTTTTGGTTTG	NA	NA	NA	NA	ATTAAA	-17_x000D_
PB.5602.1	LUXX01002421.1	+	1874	4	novel_in_catalog	ENSSSCG00025011373	novel	2124	5	NA	NA	-2	0	intron_retention	FALSE	canonical	NA	NA	NA	NA	NA	NA	NA	TRUE	NA	NA	NA	A	coding	168	507	66	572	446421	449232	FALSE	25	CACCTCACTTCAAGGATTCT	NA	NA	NA	NA	AATAAA	-42_x000D_
PB.5603.1	LUXX01002421.1	-	1203	4	full-splice_match	ENSSSCG00025011600	ENSSSCT00025015309	1332	4	131	-2	131	2	multi-exon	FALSE	canonical	NA	NA	NA	NA	NA	NA	NA	TRUE	NA	NA	NA	A	non_coding	NA	NA	NA	NA	NA	NA	NA	45	AAATCAGATTCTCATATACA	NA	NA	NA	NA	ATTAAA	-18_x000D_
PB.5604.1	LUXX01002421.1	+	1394	4	novel_in_catalog	ENSSSCG00025013884	novel	1324	5	NA	NA	0	145	combination_of_known_splicesites	FALSE	canonical	NA	NA	NA	NA	NA	NA	NA	TRUE	NA	NA	NA	A	coding	218	657	306	962	1189786	1193778	FALSE	15	ACGGATTTTGTACTTTGTTG	NA	NA	NA	NA	ATTAAA	-16_x000D_
PB.6861.1	LUXX01002449.1	+	1391	9	novel_not_in_catalog	ENSSSCG00025015051	novel	2564	10	NA	NA	25	1	intron_retention	FALSE	canonical	NA	NA	NA	NA	NA	NA	NA	TRUE	NA	NA	NA	A	coding	233	702	315	1016	17663	31843	FALSE	5	TTTTTTTTTTTTTTANNNNN	NA	NA	NA	NA	AATAAA	-19_x000D_
PB.6862.1	LUXX01002449.1	+	1849	9	novel_not_in_catalog	ENSSSCG00025015490	novel	2902	10	NA	NA	14	-1181	at_least_one_novel_splicesite	FALSE	canonical	NA	NA	NA	NA	NA	NA	NA	TRUE	NA	NA	NA	B	coding	507	1524	200	1723	120414	122963	FALSE	15	TAGGTGTGATCATTCGTGTG	NA	NA	NA	NA	NA	NA_x000D_
PB.6862.2	LUXX01002449.1	+	2970	9	incomplete-splice_match	ENSSSCG00025015490	ENSSSCT00025020822	2902	10	-12	-5	-12	4	intron_retention	FALSE	canonical	NA	NA	NA	NA	NA	NA	NA	TRUE	NA	NA	NA	B	coding	507	1524	135	1658	120414	122963	FALSE	10	GGCTGTTGGGTCATCTATTG	NA	NA	NA	NA	AATAAA	-19_x000D_
PB.6862.3	LUXX01002449.1	+	1761	9	incomplete-splice_match	ENSSSCG00025015490	ENSSSCT00025020852	2477	11	-9	1181	-9	-1181	intron_retention	FALSE	canonical	NA	NA	NA	NA	NA	NA	NA	TRUE	NA	NA	NA	B	coding	507	1524	112	1635	120414	122963	FALSE	15	TAGGTGTGATCATTCGTGTG	NA	NA	NA	NA	NA	NA_x000D_
PB.6863.1	LUXX01002449.1	+	1443	11	full-splice_match	ENSSSCG00025015815	ENSSSCT00025021229	1704	11	256	5	256	-5	multi-exon	TRUE	canonical	NA	NA	NA	NA	NA	NA	NA	TRUE	NA	NA	NA	C	coding	395	1188	58	1245	164108	167131	FALSE	10	ACACCCTGTCCTGCCCTGCT	NA	NA	NA	NA	AATAAA	-16_x000D_
PB.6863.2	LUXX01002449.1	+	1638	10	novel_not_in_catalog	ENSSSCG00025015815	novel	1704	11	NA	NA	266	-5	intron_retention	FALSE	canonical	NA	NA	NA	NA	NA	NA	NA	TRUE	NA	NA	NA	C	coding	150	453	48	500	164108	165053	TRUE	10	ACACCCTGTCCTGCCCTGCT	NA	NA	NA	NA	AATAAA	-16_x000D_
PB.6863.3	LUXX01002449.1	+	1604	10	novel_in_catalog	ENSSSCG00025015815	novel	1704	11	NA	NA	275	-5	intron_retention	FALSE	canonical	NA	NA	NA	NA	NA	NA	NA	TRUE	NA	NA	NA	C	coding	225	678	729	1406	165291	167131	FALSE	10	ACACCCTGTCCTGCCCTGCT	NA	NA	NA	NA	AATAAA	-16_x000D_
PB.6864.1	LUXX01002449.1	+	2699	19	novel_in_catalog	ENSSSCG00025015933	novel	2807	19	NA	NA	-49	1	combination_of_known_junctions	FALSE	canonical	NA	NA	NA	NA	NA	NA	NA	TRUE	NA	NA	NA	A	coding	772	2319	132	2450	168339	175465	FALSE	20	TTTTAGCCCTTAAGTACGTG	NA	NA	NA	NA	AATAAA	-21_x000D_
PB.6865.1	LUXX01002449.1	-	2063	20	novel_in_catalog	ENSSSCG00025016357	novel	5083	19	NA	NA	13	20	combination_of_known_junctions	TRUE	canonical	NA	NA	NA	NA	NA	NA	NA	TRUE	NA	NA	NA	A	coding	610	1833	115	1947	244159	233709	FALSE	25	TACAAAACTGTTCTGTGTGG	NA	NA	NA	NA	AATAAA	-34_x000D_
PB.6866.1	LUXX01002449.1	+	3103	13	novel_not_in_catalog	ENSSSCG00025016519	novel	2798	13	NA	NA	124	-1	intron_retention	TRUE	canonical	NA	NA	NA	NA	NA	NA	NA	TRUE	NA	NA	NA	C	coding	522	1569	1072	2640	245804	248612	FALSE	10	ACCACGTGCTGCCGTTTCCT	NA	NA	NA	NA	AATAAA	-16_x000D_
PB.6866.2	LUXX01002449.1	+	2593	14	novel_not_in_catalog	ENSSSCG00025016519	novel	2798	13	NA	NA	135	-1	at_least_one_novel_splicesite	FALSE	canonical	NA	NA	NA	NA	NA	NA	NA	TRUE	NA	NA	NA	C	coding	700	2103	28	2130	244474	248612	FALSE	10	ACCACGTGCTGCCGTTTCCT	NA	NA	NA	NA	AATAAA	-16_x000D_
PB.6866.3	LUXX01002449.1	+	2662	13	full-splice_match	ENSSSCG00025016519	ENSSSCT00025022281	2798	13	138	-2	138	2	multi-exon	FALSE	canonical	NA	NA	NA	NA	NA	NA	NA	TRUE	NA	NA	NA	C	coding	723	2172	25	2196	244474	248612	FALSE	5	ACGTGCTGCCGTTTCCTTCC	NA	NA	NA	NA	AATAAA	-19_x000D_
PB.6866.4	LUXX01002449.1	+	2561	13	novel_not_in_catalog	ENSSSCG00025016519	novel	2798	13	NA	NA	138	-1	at_least_one_novel_splicesite	FALSE	canonical	NA	NA	NA	NA	NA	NA	NA	TRUE	NA	NA	NA	C	coding	522	1569	530	2098	245804	248612	FALSE	10	ACCACGTGCTGCCGTTTCCT	NA	NA	NA	NA	AATAAA	-16_x000D_
PB.6867.1	LUXX01002449.1	+	6439	37	novel_not_in_catalog	ENSSSCG00025017836	novel	6867	39	NA	NA	-5790	-2	at_least_one_novel_splicesite	FALSE	canonical	NA	NA	NA	NA	NA	NA	NA	TRUE	NA	NA	NA	B	coding	1841	5526	184	5709	414397	426697	FALSE	5	ATGCTGCTGGTTGGCTGGGT	NA	NA	NA	NA	AATACA	-13_x000D_
PB.6867.2	LUXX01002449.1	+	6304	39	novel_not_in_catalog	ENSSSCG00025017836	novel	6867	39	NA	NA	-5756	-2	at_least_one_novel_splicesite	FALSE	canonical	NA	NA	NA	NA	NA	NA	NA	TRUE	NA	NA	NA	B	coding	1841	5526	204	5729	414397	426697	TRUE	5	ATGCTGCTGGTTGGCTGGGT	NA	NA	NA	NA	AATACA	-13_x000D_
PB.6867.3	LUXX01002449.1	+	6450	38	novel_not_in_catalog	ENSSSCG00025017836	novel	6867	39	NA	NA	-5746	-1	at_least_one_novel_splicesite	FALSE	canonical	NA	NA	NA	NA	NA	NA	NA	TRUE	NA	NA	NA	B	coding	1841	5526	194	5719	414397	426697	FALSE	0	TGCTGCTGGTTGGCTGGGTT	NA	NA	NA	NA	AATACA	-14_x000D_
PB.6868.1	LUXX01002449.1	+	2503	20	full-splice_match	ENSSSCG00025018255	ENSSSCT00025024822	2550	20	44	3	0	0	multi-exon	FALSE	canonical	NA	NA	NA	NA	NA	NA	NA	TRUE	NA	NA	NA	C	coding	671	2016	203	2218	450721	455719	FALSE	20	AAAGCCTGACTCCGCCTCCT	NA	NA	NA	NA	AGTAAA	-14_x000D_
PB.6868.2	LUXX01002449.1	+	2632	19	incomplete-splice_match	ENSSSCG00025018255	ENSSSCT00025024822	2550	20	67	3	0	0	intron_retention	FALSE	canonical	NA	NA	NA	NA	NA	NA	NA	TRUE	NA	NA	NA	C	coding	677	2034	180	2213	450721	455585	FALSE	20	AAAGCCTGACTCCGCCTCCT	NA	NA	NA	NA	AGTAAA	-14_x000D_
PB.6899.1	LUXX01002492.1	+	4280	21	novel_in_catalog	ENSSSCG00025019720	novel	4194	20	NA	NA	5	1	combination_of_known_junctions	FALSE	canonical	NA	NA	NA	NA	NA	NA	NA	TRUE	NA	NA	NA	A	coding	646	1941	349	2289	37406	81422	FALSE	30	ACAAACATGTCACTTTTTCT	NA	NA	NA	NA	ATTAAA	-17_x000D_
PB.7436.1	LUXX01002669.1	-	2340	8	novel_not_in_catalog	ENSSSCG00025000393	novel	8354	21	NA	NA	23188	-1	at_least_one_novel_splicesite	FALSE	canonical	NA	NA	NA	NA	NA	NA	NA	TRUE	NA	NA	NA	A	coding	452	1359	356	1714	6440	4228	FALSE	15	ATCTGTGTGGCTGCCCACAC	NA	NA	NA	NA	ATTAAA	-13_x000D_
PB.7437.1	LUXX01002669.1	-	2827	3	full-splice_match	ENSSSCG00025000776	ENSSSCT00025000942	6264	3	10	3427	10	17	multi-exon	FALSE	canonical	NA	NA	NA	NA	NA	NA	NA	TRUE	NA	NA	NA	A	coding	668	2007	195	2201	70375	68369	FALSE	15	AGTGTCTTGTTGATTTATTC	NA	NA	NA	NA	NA	NA_x000D_
PB.4730.1	LUXX01002864.1	-	716	3	novel_not_in_catalog	ENSSSCG00025002311	novel	731	4	NA	NA	10	-4	at_least_one_novel_splicesite	FALSE	canonical	NA	NA	NA	NA	NA	NA	NA	TRUE	NA	NA	NA	B	non_coding	NA	NA	NA	NA	NA	NA	NA	15	AACTCTGGTTTTGCTTTACT	NA	NA	NA	NA	ATTAAA	-12_x000D_
PB.4730.2	LUXX01002864.1	-	658	3	novel_in_catalog	ENSSSCG00025002311	novel	731	4	NA	NA	17	-4	combination_of_known_splicesites	FALSE	canonical	NA	NA	NA	NA	NA	NA	NA	TRUE	NA	NA	NA	B	non_coding	NA	NA	NA	NA	NA	NA	NA	15	AACTCTGGTTTTGCTTTACT	NA	NA	NA	NA	ATTAAA	-12_x000D_
PB.4731.1	LUXX01002864.1	+	4545	14	incomplete-splice_match	ENSSSCG00025003426	ENSSSCT00025004539	7055	15	-34	2582	-8	-1978	3prime_fragment	FALSE	canonical	NA	NA	NA	NA	NA	NA	NA	TRUE	NA	NA	NA	B	coding	1151	3456	612	4067	1444023	1595413	FALSE	45	AAAACATCTCAGAGATTTTA	NA	NA	NA	NA	AATAAA	-10_x000D_
PB.4731.2	LUXX01002864.1	+	2441	2	incomplete-splice_match	ENSSSCG00025003426	ENSSSCT00025004513	6191	15	11	151998	-1	-127261	intron_retention	FALSE	canonical	NA	NA	NA	NA	NA	NA	NA	TRUE	NA	NA	NA	B	coding	616	1848	593	2440	1444023	1445870	FALSE	65	AAGAAAAAGAAATGATGCAA	NA	NA	NA	NA	NA	NA_x000D_
PB.4731.3	LUXX01002864.1	+	7112	14	incomplete-splice_match	ENSSSCG00025003426	ENSSSCT00025004539	7055	15	16	-35	16	35	intron_retention	FALSE	canonical	NA	NA	NA	NA	NA	NA	NA	TRUE	NA	NA	NA	B	coding	1151	3456	562	4017	1444023	1595413	FALSE	45	AAAAGAACAGGATGTGTCAT	NA	NA	NA	NA	NA	NA_x000D_
PB.4732.1	LUXX01002864.1	+	1840	15	novel_in_catalog	ENSSSCG00025003779	novel	3225	18	NA	NA	-17	1	combination_of_known_junctions	FALSE	canonical	NA	NA	NA	NA	NA	NA	NA	TRUE	NA	NA	NA	A	coding	539	1620	22	1641	1668420	1765831	FALSE	30	ATATTTTTGGAGCTTAAATC	NA	NA	NA	NA	ATTAAA	-17_x000D_
PB.4934.1	LUXX01002987.1	-	1544	1	intergenic	novelGene_391	novel	NA	NA	NA	NA	NA	NA	mono-exon	FALSE	NA	NA	NA	NA	NA	NA	NA	NA	NA	NA	NA	NA	A	non_coding	NA	NA	NA	NA	NA	NA	NA	90	AAAAAGACAAAAAAAAAAAA	NA	NA	NA	NA	NA	NA_x000D_
PB.4935.1	LUXX01002987.1	+	3086	1	intergenic	novelGene_392	novel	NA	NA	NA	NA	NA	NA	mono-exon	FALSE	NA	NA	NA	NA	NA	NA	NA	NA	NA	NA	NA	NA	A	non_coding	NA	NA	NA	NA	NA	NA	NA	85	AAAAAGACAAAAAAAAGAAA	NA	NA	NA	NA	NA	NA_x000D_
PB.4935.2	LUXX01002987.1	+	1913	1	intergenic	novelGene_393	novel	NA	NA	NA	NA	NA	NA	mono-exon	FALSE	NA	NA	NA	NA	NA	NA	NA	NA	NA	NA	NA	NA	A	non_coding	NA	NA	NA	NA	NA	NA	NA	85	AAAAAGACAAAAAAAAGAAA	NA	NA	NA	NA	NA	NA_x000D_
PB.4936.1	LUXX01002987.1	+	2069	12	novel_in_catalog	ENSSSCG00025004497	novel	9418	13	NA	NA	4	266	combination_of_known_junctions	FALSE	canonical	NA	NA	NA	NA	NA	NA	NA	TRUE	NA	NA	NA	B	coding	467	1404	229	1632	1540050	1600272	FALSE	20	TAATCTGTTATTCCCACTTC	NA	NA	NA	NA	TATAAA	-12_x000D_
PB.4936.2	LUXX01002987.1	+	2223	12	novel_in_catalog	ENSSSCG00025004497	novel	9418	13	NA	NA	12	428	combination_of_known_junctions	FALSE	canonical	NA	NA	NA	NA	NA	NA	NA	TRUE	NA	NA	NA	B	coding	467	1404	221	1624	1540050	1600272	FALSE	30	TAATTTTTGAAATCCTTGAC	NA	NA	NA	NA	AATAAA	-24_x000D_
PB.4936.3	LUXX01002987.1	+	2102	11	novel_in_catalog	ENSSSCG00025004497	novel	1717	11	NA	NA	36	415	combination_of_known_splicesites	FALSE	canonical	NA	NA	NA	NA	NA	NA	NA	TRUE	NA	NA	NA	B	coding	467	1404	113	1516	1540050	1600272	FALSE	45	AAGAAAAGTGGATTAATTTT	NA	NA	NA	NA	AATAAA	-11_x000D_
PB.7035.1	LUXX01003059.1	-	3150	18	novel_not_in_catalog	ENSSSCG00025004597	novel	6338	20	NA	NA	-20	342	at_least_one_novel_splicesite	FALSE	canonical	NA	NA	NA	NA	NA	NA	NA	TRUE	NA	NA	NA	B	coding	471	1416	1265	2680	39357	12564	FALSE	10	ACTCTTGGTTTCTTTTGATC	NA	NA	NA	NA	ATTAAA	-13_x000D_
PB.7035.2	LUXX01003059.1	-	2844	19	incomplete-splice_match	ENSSSCG00025004597	ENSSSCT00025006235	6338	20	382	3221	-39	342	3prime_fragment	FALSE	canonical	NA	NA	NA	NA	NA	NA	NA	TRUE	NA	NA	NA	B	coding	780	2343	32	2374	96602	12564	FALSE	10	ACTCTTGGTTTCTTTTGATC	NA	NA	NA	NA	ATTAAA	-13_x000D_
PB.7035.3	LUXX01003059.1	-	2170	18	incomplete-splice_match	ENSSSCG00025004597	ENSSSCT00025006263	3234	19	379	732	-29	-732	3prime_fragment	FALSE	canonical	NA	NA	NA	NA	NA	NA	NA	TRUE	NA	NA	NA	B	coding	716	2148	22	2169	96602	17120	FALSE	40	TTTGTAATGTTAAGAAGAAT	NA	NA	NA	NA	AATGAA	-35_x000D_
PB.7036.1	LUXX01003059.1	+	3100	18	full-splice_match	ENSSSCG00025001183	ENSSSCT00025001473	3287	18	12	175	0	2	multi-exon	FALSE	canonical	NA	NA	NA	NA	NA	NA	NA	TRUE	NA	NA	NA	C	coding	890	2673	22	2694	459809	551699	FALSE	30	AATTTTATGGAAGCTCTTCA	NA	NA	NA	NA	AATAAA	-14_x000D_
PB.7036.2	LUXX01003059.1	+	1602	10	incomplete-splice_match	ENSSSCG00025001183	ENSSSCT00025001509	2931	17	-6	46865	5	-46865	3prime_fragment	FALSE	canonical	NA	NA	NA	NA	NA	NA	NA	TRUE	NA	NA	NA	C	coding	528	1584	17	1600	459809	505236	FALSE	50	AAAAAAATCTGCAGTAATGG	NA	NA	NA	NA	TATAAA	-27_x000D_
PB.7036.3	LUXX01003059.1	+	3271	18	full-splice_match	ENSSSCG00025001183	ENSSSCT00025001473	3287	18	20	-4	-3	-2	multi-exon	FALSE	canonical	NA	NA	NA	NA	NA	NA	NA	TRUE	NA	NA	NA	C	coding	890	2673	14	2686	459809	551699	FALSE	35	AATAAAATGTTCATTTGTTT	NA	NA	NA	NA	AATAAA	-14_x000D_
PB.7036.4	LUXX01003059.1	+	1744	9	incomplete-splice_match	ENSSSCG00025001183	ENSSSCT00025001497	3147	17	45368	2	45368	-2	5prime_fragment	FALSE	canonical	NA	NA	NA	NA	NA	NA	NA	TRUE	NA	NA	NA	C	coding	356	1071	89	1159	505255	551699	FALSE	35	AATAAAATGTTCATTTGTTT	NA	NA	NA	NA	AATAAA	-14_x000D_
PB.4772.1	LUXX01003146.1	-	5381	8	novel_in_catalog	ENSSSCG00025002285	novel	3838	9	NA	NA	-44	1388	intron_retention	FALSE	canonical	NA	NA	NA	NA	NA	NA	NA	TRUE	NA	NA	NA	A	coding	521	1566	494	2059	422026	414300	FALSE	5	TGGGGGTATCCTGTTGTTTT	NA	NA	NA	NA	AATAAA	-16_x000D_
PB.4773.1	LUXX01003146.1	-	3015	17	novel_not_in_catalog	ENSSSCG00025002551	novel	4150	18	NA	NA	336	1	at_least_one_novel_splicesite	FALSE	canonical	NA	NA	NA	NA	NA	NA	NA	TRUE	NA	NA	NA	B	coding	614	1845	464	2308	489231	480138	FALSE	25	ACCTGTACCATTACCAGTTC	NA	NA	NA	NA	ATTAAA	-18_x000D_
PB.4773.2	LUXX01003146.1	-	2843	17	incomplete-splice_match	ENSSSCG00025002551	ENSSSCT00025003335	4150	18	13	2215	6	-2	3prime_fragment	FALSE	canonical	NA	NA	NA	NA	NA	NA	NA	TRUE	NA	NA	NA	B	coding	708	2127	13	2139	500935	480138	FALSE	30	ATGACCTGTACCATTACCAG	NA	NA	NA	NA	ATTAAA	-15_x000D_
PB.4773.4	LUXX01003146.1	-	2276	17	incomplete-splice_match	ENSSSCG00025002551	ENSSSCT00025003335	4150	18	13	2782	6	1	3prime_fragment	FALSE	canonical	NA	NA	NA	NA	NA	NA	NA	TRUE	NA	NA	NA	B	coding	708	2127	13	2139	500935	480138	FALSE	55	AAAAGAGACCATGAGAGATA	NA	NA	NA	NA	ATTAAA	-16_x000D_
PB.4774.1	LUXX01003146.1	+	4342	33	novel_in_catalog	ENSSSCG00025002866	novel	5260	34	NA	NA	2	-1	combination_of_known_junctions	TRUE	canonical	NA	NA	NA	NA	NA	NA	NA	TRUE	NA	NA	NA	B	coding	1224	3675	81	3755	501161	549934	FALSE	5	TGTGGCTTGCCATTTGTTTT	NA	NA	NA	NA	AATAAA	-16_x000D_
PB.4774.2	LUXX01003146.1	+	4950	33	novel_in_catalog	ENSSSCG00025002866	novel	5260	34	NA	NA	13	35	combination_of_known_junctions	FALSE	canonical	NA	NA	NA	NA	NA	NA	NA	TRUE	NA	NA	NA	B	coding	1224	3675	70	3744	501161	549934	FALSE	20	AAGAGTTCCCATTGTGGCTC	NA	NA	NA	NA	AATAAA	-11_x000D_
PB.4774.3	LUXX01003146.1	+	4225	32	incomplete-splice_match	ENSSSCG00025002866	ENSSSCT00025003977	5154	34	220	1664	220	0	internal_fragment	FALSE	canonical	NA	NA	NA	NA	NA	NA	NA	TRUE	NA	NA	NA	B	coding	1185	3558	80	3637	504732	549934	FALSE	5	GTGGCTTGCCATTTGTTTTC	NA	NA	NA	NA	AATAAA	-17_x000D_
PB.4774.4	LUXX01003146.1	+	4109	31	incomplete-splice_match	ENSSSCG00025002866	ENSSSCT00025003977	5154	34	524	1665	524	-1	internal_fragment	FALSE	canonical	NA	NA	NA	NA	NA	NA	NA	TRUE	NA	NA	NA	B	coding	1086	3261	262	3522	512859	549934	FALSE	5	TGTGGCTTGCCATTTGTTTT	NA	NA	NA	NA	AATAAA	-16_x000D_
PB.4774.5	LUXX01003146.1	+	3192	22	incomplete-splice_match	ENSSSCG00025002866	ENSSSCT00025003977	5154	34	25770	1661	25770	3	internal_fragment	FALSE	canonical	NA	NA	NA	NA	NA	NA	NA	TRUE	NA	NA	NA	B	coding	857	2574	28	2601	530230	549934	FALSE	5	GCTTGCCATTTGTTTTCTGG	NA	NA	NA	NA	AATAAA	-20_x000D_
PB.4775.1	LUXX01003146.1	+	1946	8	full-splice_match	ENSSSCG00025003444	ENSSSCT00025004559	2085	8	-14	153	-14	-153	multi-exon	FALSE	canonical	NA	NA	NA	NA	NA	NA	NA	TRUE	NA	NA	NA	C	coding	299	900	19	918	555909	560826	FALSE	20	ATTGTAGCCTATTTTTCATC	NA	NA	NA	NA	AATAAA	-15_x000D_
PB.4775.2	LUXX01003146.1	+	2976	8	full-splice_match	ENSSSCG00025003444	ENSSSCT00025004559	2085	8	-13	-878	-13	878	multi-exon	FALSE	canonical	NA	NA	NA	NA	NA	NA	NA	TRUE	NA	NA	NA	C	coding	299	900	18	917	555909	560826	FALSE	10	TATTCTAGTTTCCTTTTTTT	NA	NA	NA	NA	TATAAA	-13_x000D_
PB.4775.3	LUXX01003146.1	+	2200	8	full-splice_match	ENSSSCG00025003444	ENSSSCT00025004559	2085	8	-13	-102	-13	102	multi-exon	FALSE	canonical	NA	NA	NA	NA	NA	NA	NA	TRUE	NA	NA	NA	C	coding	299	900	18	917	555909	560826	FALSE	10	ATCTTTCCTTGTTTTCTTGA	NA	NA	NA	NA	GATAAA	-15_x000D_
PB.4775.4	LUXX01003146.1	+	4152	8	full-splice_match	ENSSSCG00025003444	ENSSSCT00025004559	2085	8	-8	-2059	-8	2059	multi-exon	FALSE	canonical	NA	NA	NA	NA	NA	NA	NA	TRUE	NA	NA	NA	C	coding	299	900	13	912	555909	560826	FALSE	20	AGTCATTTTTCTATGATTCT	NA	NA	NA	NA	AATACA	-17_x000D_
PB.4775.5	LUXX01003146.1	+	1652	8	full-splice_match	ENSSSCG00025003444	ENSSSCT00025004559	2085	8	-5	438	-5	-438	multi-exon	FALSE	canonical	NA	NA	NA	NA	NA	NA	NA	TRUE	NA	NA	NA	C	coding	299	900	10	909	555909	560826	FALSE	35	AAAAACCTCTTTATTCTGAG	NA	NA	NA	NA	NA	NA_x000D_
PB.4776.1	LUXX01003146.1	+	1725	1	genic	ENSSSCG00025003248	novel	NA	NA	NA	NA	-98	-19808	mono-exon	FALSE	NA	NA	NA	NA	NA	NA	NA	NA	NA	NA	NA	NA	B	non_coding	NA	NA	NA	NA	NA	NA	NA	90	TAAAAAAAAAAAAAAAAAGA	NA	NA	NA	NA	GATAAA	-12_x000D_
PB.4776.2	LUXX01003146.1	+	2091	14	novel_not_in_catalog	ENSSSCG00025003248	novel	2273	15	NA	NA	-77	11	at_least_one_novel_splicesite	FALSE	canonical	NA	NA	NA	NA	NA	NA	NA	TRUE	NA	NA	NA	B	coding	596	1791	180	1970	590133	620255	FALSE	100	AAAAAAAAAAAAAAAAAAAA	NA	NA	NA	NA	NA	NA_x000D_
PB.4776.3	LUXX01003146.1	+	2017	13	novel_not_in_catalog	ENSSSCG00025003248	novel	2273	15	NA	NA	-77	10	at_least_one_novel_splicesite	FALSE	canonical	NA	NA	NA	NA	NA	NA	NA	TRUE	NA	NA	NA	B	coding	596	1791	107	1897	590133	620255	FALSE	95	TAAAAAAAAAAAAAAAAAAA	NA	NA	NA	NA	NA	NA_x000D_
PB.4776.4	LUXX01003146.1	+	2373	14	novel_not_in_catalog	ENSSSCG00025003248	novel	2273	15	NA	NA	-35	11	at_least_one_novel_splicesite	FALSE	canonical	NA	NA	NA	NA	NA	NA	NA	TRUE	NA	NA	NA	B	coding	596	1791	462	2252	590133	620255	FALSE	100	AAAAAAAAAAAAAAAAAAAA	NA	NA	NA	NA	NA	NA_x000D_
PB.4776.5	LUXX01003146.1	+	2313	15	novel_in_catalog	ENSSSCG00025003248	novel	2316	15	NA	NA	-4	10	combination_of_known_junctions	FALSE	canonical	NA	NA	NA	NA	NA	NA	NA	TRUE	NA	NA	NA	B	coding	596	1791	403	2193	590133	620255	FALSE	95	TAAAAAAAAAAAAAAAAAAA	NA	NA	NA	NA	NA	NA_x000D_
PB.4776.6	LUXX01003146.1	+	2187	14	novel_in_catalog	ENSSSCG00025003248	novel	2273	15	NA	NA	0	11	combination_of_known_junctions	FALSE	canonical	NA	NA	NA	NA	NA	NA	NA	TRUE	NA	NA	NA	B	coding	596	1791	276	2066	590133	620255	FALSE	100	AAAAAAAAAAAAAAAAAAAA	NA	NA	NA	NA	NA	NA_x000D_
PB.4776.7	LUXX01003146.1	+	2465	3	novel_in_catalog	ENSSSCG00025003248	novel	2273	15	NA	NA	3	515	intron_retention	FALSE	canonical	NA	NA	NA	NA	NA	NA	NA	TRUE	NA	NA	NA	B	coding	274	825	1133	1957	590133	595360	FALSE	85	AAAAAAAAAAAAAAAAGAGG	NA	NA	NA	NA	NA	NA_x000D_
PB.4777.1	LUXX01003146.1	-	2492	4	incomplete-splice_match	ENSSSCG00025003543	ENSSSCT00025004674	4160	6	3171	-24	-4	1	5prime_fragment	FALSE	canonical	NA	NA	NA	NA	NA	NA	NA	TRUE	NA	NA	NA	B	coding	130	393	146	538	626291	624402	FALSE	35	ATTAAATGATTCTAGGATTT	NA	NA	NA	NA	AATAAA	-19_x000D_
PB.4777.3	LUXX01003146.1	-	2231	4	incomplete-splice_match	ENSSSCG00025003543	ENSSSCT00025004674	4160	6	3190	218	15	-218	5prime_fragment	FALSE	canonical	NA	NA	NA	NA	NA	NA	NA	TRUE	NA	NA	NA	B	coding	130	393	127	519	626291	624402	FALSE	55	AGAGAGAAAGAGAGAATGAG	NA	NA	NA	NA	NA	NA_x000D_
PB.4777.4	LUXX01003146.1	-	1819	4	incomplete-splice_match	ENSSSCG00025003543	ENSSSCT00025004674	4160	6	3190	630	15	-630	5prime_fragment	FALSE	canonical	NA	NA	NA	NA	NA	NA	NA	TRUE	NA	NA	NA	B	coding	130	393	127	519	626291	624402	FALSE	70	AAAACGAAAAAGAAAACTTA	NA	NA	NA	NA	NA	NA_x000D_
PB.4778.1	LUXX01003146.1	+	2248	7	full-splice_match	ENSSSCG00025005103	ENSSSCT00025006888	2347	7	100	-1	100	1	multi-exon	FALSE	canonical	NA	NA	NA	NA	NA	NA	NA	TRUE	NA	NA	NA	A	coding	610	1833	146	1978	752526	759584	TRUE	25	AAAATCCAGGGCTGTCTGTG	NA	NA	NA	NA	AATAAA	-11_x000D_
PB.4779.1	LUXX01003146.1	+	1499	1	intergenic	novelGene_373	novel	NA	NA	NA	NA	NA	NA	mono-exon	FALSE	NA	NA	NA	NA	NA	NA	NA	NA	NA	NA	NA	NA	A	coding	423	1272	150	1421	820572	821843	NA	85	AAAGAAAAAAACAAAAACAA	NA	NA	NA	NA	NA	NA_x000D_
PB.4780.1	LUXX01003146.1	+	4072	21	full-splice_match	ENSSSCG00025005161	ENSSSCT00025006955	4469	21	412	-15	0	8	multi-exon	FALSE	canonical	NA	NA	NA	NA	NA	NA	NA	TRUE	NA	NA	NA	A	coding	1186	3561	235	3795	905671	922777	FALSE	20	TATCATCTGGTTTTGAATTT	NA	NA	NA	NA	AATAAA	-21_x000D_
PB.6994.1	LUXX01003209.1	+	3467	8	novel_in_catalog	ENSSSCG00025001726	novel	3593	9	NA	NA	0	-3	combination_of_known_junctions	FALSE	canonical	NA	NA	NA	NA	NA	NA	NA	TRUE	NA	NA	NA	A	coding	365	1098	29	1126	218886	268471	FALSE	30	TAATGTCTGCTATTTAACAT	NA	NA	NA	NA	AATAAA	-16_x000D_
PB.6995.1	LUXX01003209.1	-	2264	3	novel_not_in_catalog	ENSSSCG00025001953	novel	5749	11	NA	NA	32	-14382	intron_retention	TRUE	canonical	NA	NA	NA	NA	NA	NA	NA	TRUE	NA	NA	NA	A	non_coding	NA	NA	NA	NA	NA	NA	NA	30	TAAATACTCCTGTTATACCT	NA	NA	NA	NA	AATAAA	-16_x000D_
PB.4828.2	LUXX01003289.1	-	1929	8	novel_not_in_catalog	ENSSSCG00025002571	novel	2681	8	NA	NA	0	1	at_least_one_novel_splicesite	FALSE	canonical	NA	NA	NA	NA	NA	NA	NA	TRUE	NA	NA	NA	B	coding	350	1053	238	1290	32192	13694	FALSE	10	ATCTCCGAGTGCTGTTTGTC	NA	NA	NA	NA	AGTAAA	-15_x000D_
PB.4828.3	LUXX01003289.1	-	1838	7	novel_not_in_catalog	ENSSSCG00025002571	novel	3165	7	NA	NA	-28	1	at_least_one_novel_splicesite	FALSE	canonical	NA	NA	NA	NA	NA	NA	NA	TRUE	NA	NA	NA	B	coding	377	1134	66	1199	32273	13694	FALSE	10	ATCTCCGAGTGCTGTTTGTC	NA	NA	NA	NA	AGTAAA	-15_x000D_
PB.4829.1	LUXX01003289.1	+	3137	11	novel_not_in_catalog	ENSSSCG00025002756	novel	2311	12	NA	NA	-19	-4	intron_retention	FALSE	canonical	NA	NA	NA	NA	NA	NA	NA	TRUE	NA	NA	NA	B	coding	216	651	2275	2925	60908	63975	FALSE	40	AAATTTATATGAATCTGTAC	NA	NA	NA	NA	AATAAA	-16_x000D_
PB.4829.2	LUXX01003289.1	+	3154	11	novel_not_in_catalog	ENSSSCG00025002756	novel	2311	12	NA	NA	32	-4	intron_retention	FALSE	canonical	NA	NA	NA	NA	NA	NA	NA	TRUE	NA	NA	NA	B	coding	257	774	2169	2942	60785	63975	FALSE	40	AAATTTATATGAATCTGTAC	NA	NA	NA	NA	AATAAA	-16_x000D_
PB.4829.3	LUXX01003289.1	+	2845	1	novel_in_catalog	ENSSSCG00025002756	novel	3073	12	NA	NA	36	-5629	mono-exon_by_intron_retention	FALSE	NA	NA	NA	NA	NA	NA	NA	NA	NA	NA	NA	NA	B	non_coding	NA	NA	NA	NA	NA	NA	NA	90	AAAAAAAAAAAAGAAAAACA	NA	NA	NA	NA	TTTAAA	-39_x000D_
PB.4830.2	LUXX01003289.1	-	4135	12	novel_in_catalog	ENSSSCG00025002956	novel	6094	13	NA	NA	-15	-2015	intron_retention	TRUE	canonical	NA	NA	NA	NA	NA	NA	NA	TRUE	NA	NA	NA	B	coding	419	1260	92	1351	90558	76814	FALSE	30	AGATATGCTGTATATGTATT	NA	NA	NA	NA	AATAAA	-13_x000D_
PB.4830.4	LUXX01003289.1	-	3891	12	novel_in_catalog	ENSSSCG00025002956	novel	6094	13	NA	NA	-15	2115	intron_retention	FALSE	canonical	NA	NA	NA	NA	NA	NA	NA	TRUE	NA	NA	NA	B	coding	419	1260	92	1351	90558	76814	FALSE	35	ATCATAAGTTTCTTAATTAT	NA	NA	NA	NA	ATTAAA	-17_x000D_
PB.4830.5	LUXX01003289.1	-	3389	12	novel_in_catalog	ENSSSCG00025002956	novel	6094	13	NA	NA	-20	1608	intron_retention	FALSE	canonical	NA	NA	NA	NA	NA	NA	NA	TRUE	NA	NA	NA	B	coding	419	1260	97	1356	90558	76814	FALSE	40	TAATGACTCTCAAACTGGAA	NA	NA	NA	NA	ATTAAA	-20_x000D_
PB.4830.6	LUXX01003289.1	-	3250	12	novel_in_catalog	ENSSSCG00025002956	novel	6094	13	NA	NA	-15	1474	intron_retention	FALSE	canonical	NA	NA	NA	NA	NA	NA	NA	TRUE	NA	NA	NA	B	coding	419	1260	92	1351	90558	76814	FALSE	20	TAGGTTTATGTAGGTCAGTC	NA	NA	NA	NA	AATAAA	-16_x000D_
PB.4830.7	LUXX01003289.1	-	2343	12	novel_in_catalog	ENSSSCG00025002956	novel	6094	13	NA	NA	-15	567	intron_retention	FALSE	canonical	NA	NA	NA	NA	NA	NA	NA	TRUE	NA	NA	NA	B	coding	419	1260	92	1351	90558	76814	FALSE	80	AAAAAGACAAAAGACAAAAA	NA	NA	NA	NA	NA	NA_x000D_
PB.4830.8	LUXX01003289.1	-	1767	12	incomplete-splice_match	ENSSSCG00025002956	ENSSSCT00025003945	6094	13	-15	4383	-15	1	3prime_fragment	FALSE	canonical	NA	NA	NA	NA	NA	NA	NA	TRUE	NA	NA	NA	B	coding	419	1260	92	1351	90558	76814	FALSE	40	AAAAGTCTCAGAAGGCAGTG	NA	NA	NA	NA	ATTAAA	-15_x000D_
PB.4831.1	LUXX01003289.1	+	195	1	intergenic	novelGene_381	novel	NA	NA	NA	NA	NA	NA	mono-exon	FALSE	NA	NA	NA	NA	NA	NA	NA	NA	NA	NA	NA	NA	A	non_coding	NA	NA	NA	NA	NA	NA	NA	30	CTTGGAGCTAAAACCATTTG	NA	NA	NA	NA	AATAAA	-19_x000D_
PB.4832.1	LUXX01003289.1	-	4893	35	novel_in_catalog	ENSSSCG00025077563	novel	5454	36	NA	NA	-111	-38	intron_retention	FALSE	canonical	NA	NA	NA	NA	NA	NA	NA	TRUE	NA	NA	NA	B	coding	1338	4017	222	4238	459825	382937	FALSE	75	AACAACAAAAAATAAATAAC	NA	NA	NA	NA	GATAAA	-41_x000D_
PB.4832.2	LUXX01003289.1	-	4785	35	novel_in_catalog	ENSSSCG00025077563	novel	5454	36	NA	NA	-105	-140	intron_retention	FALSE	canonical	NA	NA	NA	NA	NA	NA	NA	TRUE	NA	NA	NA	B	coding	1338	4017	216	4232	459825	382937	FALSE	70	AAGAAATTGAAAAGAAAAAC	NA	NA	NA	NA	NA	NA_x000D_
PB.4832.3	LUXX01003289.1	-	4615	35	novel_in_catalog	ENSSSCG00025077563	novel	5454	36	NA	NA	-94	-299	intron_retention	FALSE	canonical	NA	NA	NA	NA	NA	NA	NA	TRUE	NA	NA	NA	B	coding	1338	4017	205	4221	459825	382937	FALSE	30	AACTGTAAAGTTGTTATTTT	NA	NA	NA	NA	AATGAA	-32_x000D_
PB.4833.1	LUXX01003289.1	+	2317	8	full-splice_match	ENSSSCG00025000502	ENSSSCT00025000599	5265	8	53	2895	53	-2895	multi-exon	FALSE	canonical	NA	NA	NA	NA	NA	NA	NA	TRUE	NA	NA	NA	A	coding	315	948	26	973	1038646	1056993	FALSE	15	TACCCTGTTTGGAGTTGGAT	NA	NA	NA	NA	ATTAAA	-18_x000D_
PB.6759.1	LUXX01003334.1	+	2845	16	incomplete-splice_match	ENSSSCG00025002493	ENSSSCT00025003459	5601	24	16	66882	-13	6	3prime_fragment	FALSE	canonical	NA	NA	NA	NA	NA	NA	NA	TRUE	NA	NA	NA	A	coding	702	2109	21	2129	39924	315171	FALSE	15	TGCCTTTGCTGATGTTAATT	NA	NA	NA	NA	AATAAA	-22_x000D_
PB.6559.1	LUXX01003408.1	+	1984	8	full-splice_match	ENSSSCG00025003496	ENSSSCT00025004630	4981	8	-41	3038	-41	126	multi-exon	FALSE	canonical	NA	NA	NA	NA	NA	NA	NA	TRUE	NA	NA	NA	C	coding	315	948	229	1176	264793	359515	TRUE	70	AAAAAAAAAAAAAACTCCTT	NA	NA	NA	NA	NA	NA_x000D_
PB.6559.2	LUXX01003408.1	+	1784	8	full-splice_match	ENSSSCG00025003496	ENSSSCT00025004630	4981	8	35	3162	35	2	multi-exon	FALSE	canonical	NA	NA	NA	NA	NA	NA	NA	TRUE	NA	NA	NA	C	coding	315	948	153	1100	264793	359515	TRUE	30	AACTTTCTTTGAAATTTGAT	NA	NA	NA	NA	GATAAA	-15_x000D_
PB.6559.3	LUXX01003408.1	+	4820	8	full-splice_match	ENSSSCG00025003496	ENSSSCT00025004630	4981	8	134	27	134	3	multi-exon	FALSE	canonical	NA	NA	NA	NA	NA	NA	NA	TRUE	NA	NA	NA	C	coding	315	948	54	1001	264793	359515	TRUE	85	AAAGATTAAAAAAAAAAAAA	NA	NA	NA	NA	AAAACA	-3_x000D_
PB.7494.1	LUXX01003818.1	-	1418	5	novel_not_in_catalog	ENSSSCG00025000309	novel	1680	5	NA	NA	-5	1	at_least_one_novel_splicesite	FALSE	canonical	NA	NA	NA	NA	NA	NA	NA	TRUE	NA	NA	NA	A	coding	237	714	670	1383	21032	20319	FALSE	0	TCTCTGTCTGTCTGTTGTCC	NA	NA	NA	NA	AGTAAA	-21_x000D_
PB.7495.1	LUXX01003818.1	+	2083	2	full-splice_match	ENSSSCG00025000596	ENSSSCT00025000711	2104	2	25	-4	10	4	multi-exon	FALSE	canonical	NA	NA	NA	NA	NA	NA	NA	TRUE	NA	NA	NA	A	coding	118	357	231	587	36079	38676	FALSE	15	ACGCCTGGTTTCGCAACCTC	NA	NA	NA	NA	ATTAAA	-13_x000D_
PB.7496.2	LUXX01003818.1	-	496	4	novel_in_catalog	ENSSSCG00025000935	novel	503	4	NA	NA	-157	-4	combination_of_known_junctions	FALSE	canonical	NA	NA	NA	NA	NA	NA	NA	TRUE	NA	NA	NA	A	coding	145	438	27	464	81989	80207	FALSE	15	AGTCCTGAGTCTGACTGGTC	NA	NA	NA	NA	AATAAA	-14_x000D_
PB.6902.1	LUXX01003827.1	+	1785	14	full-splice_match	ENSSSCG00025001340	ENSSSCT00025001754	2186	14	0	401	0	-79	multi-exon	FALSE	canonical	NA	NA	NA	NA	NA	NA	NA	TRUE	NA	NA	NA	A	coding	517	1554	109	1662	149445	156689	FALSE	10	AGTTGGTTTTCATTTTTCGT	NA	NA	NA	NA	NA	NA_x000D_
PB.6903.1	LUXX01003827.1	+	482	2	full-splice_match	ENSSSCG00025001532	ENSSSCT00025001928	1093	2	4	607	4	-607	multi-exon	FALSE	canonical	NA	NA	NA	NA	NA	NA	NA	TRUE	NA	NA	NA	A	non_coding	NA	NA	NA	NA	NA	NA	NA	20	TCTTATTTTGTATGTTGTAA	NA	NA	NA	NA	ATTAAA	-16_x000D_
PB.6904.1	LUXX01003827.1	-	1191	5	full-splice_match	ENSSSCG00025002192	ENSSSCT00025002828	1752	5	5	556	5	5	multi-exon	FALSE	canonical	NA	NA	NA	NA	NA	NA	NA	TRUE	NA	NA	NA	C	coding	183	552	98	649	278684	274664	FALSE	25	ATTACCGTGTAATTGCTACT	NA	NA	NA	NA	AATAAA	-18_x000D_
PB.6904.2	LUXX01003827.1	-	1038	5	full-splice_match	ENSSSCG00025002192	ENSSSCT00025002828	1752	5	-15	729	6	-168	multi-exon	FALSE	canonical	NA	NA	NA	NA	NA	NA	NA	TRUE	NA	NA	NA	C	coding	183	552	118	669	278684	274664	FALSE	35	TAAAAAGTTGCGCAAGTTTC	NA	NA	NA	NA	AATAAA	-27_x000D_
PB.6905.1	LUXX01003827.1	+	2701	10	incomplete-splice_match	ENSSSCG00025002318	ENSSSCT00025003005	4564	11	25	1977	2	23	3prime_fragment	FALSE	canonical	NA	NA	NA	NA	NA	NA	NA	TRUE	NA	NA	NA	B	coding	304	915	131	1045	344508	355184	FALSE	20	ATTCCTTTAGTTATCACTCT	NA	NA	NA	NA	AATATA	-17_x000D_
PB.6905.2	LUXX01003827.1	+	1985	10	incomplete-splice_match	ENSSSCG00025002318	ENSSSCT00025003005	4564	11	36	2682	13	-682	3prime_fragment	FALSE	canonical	NA	NA	NA	NA	NA	NA	NA	TRUE	NA	NA	NA	B	coding	304	915	120	1034	344508	355184	FALSE	35	TAAAATTCTGATTCTATATG	NA	NA	NA	NA	AGTAAA	-29_x000D_
PB.6906.1	LUXX01003827.1	+	3506	5	incomplete-splice_match	ENSSSCG00025002400	ENSSSCT00025003115	3436	6	-11	5	0	-5	intron_retention	FALSE	canonical	NA	NA	NA	NA	NA	NA	NA	TRUE	NA	NA	NA	B	coding	241	726	111	836	399093	415681	FALSE	50	AATAAATAAATGGGCCTCAA	NA	NA	NA	NA	AATAAA	-14_x000D_
PB.6906.2	LUXX01003827.1	+	1064	5	incomplete-splice_match	ENSSSCG00025002400	ENSSSCT00025003115	3436	6	74	2362	74	-2362	3prime_fragment	FALSE	canonical	NA	NA	NA	NA	NA	NA	NA	TRUE	NA	NA	NA	B	coding	241	726	26	751	399093	415681	FALSE	35	AGATAAATTTATCTTGTCAT	NA	NA	NA	NA	ATTAAA	-17_x000D_
PB.7530.2	LUXX01003968.1	-	8497	48	novel_in_catalog	ENSSSCG00025003953	novel	8961	49	NA	NA	-10	1	intron_retention	FALSE	canonical	NA	NA	NA	NA	NA	NA	NA	TRUE	NA	NA	NA	B	coding	2647	7944	233	8176	23352	1922	FALSE	10	AGGGTGGCTTGAGCTTTGTG	NA	NA	NA	NA	AATAAA	-19_x000D_
PB.7530.3	LUXX01003968.1	-	8491	48	novel_not_in_catalog	ENSSSCG00025003953	novel	8961	49	NA	NA	13	1	intron_retention	FALSE	canonical	NA	NA	NA	NA	NA	NA	NA	TRUE	NA	NA	NA	B	coding	2647	7944	227	8170	23352	1922	FALSE	10	AGGGTGGCTTGAGCTTTGTG	NA	NA	NA	NA	AATAAA	-19_x000D_
PB.7530.33	LUXX01003968.1	-	2989	16	novel_not_in_catalog	ENSSSCG00025003953	novel	8416	47	NA	NA	-10	1	intron_retention	FALSE	canonical	NA	NA	NA	NA	NA	NA	NA	TRUE	NA	NA	NA	B	coding	811	2436	233	2668	23352	1922	FALSE	10	AGGGTGGCTTGAGCTTTGTG	NA	NA	NA	NA	AATAAA	-19_x000D_
PB.7530.45	LUXX01003968.1	-	8472	47	novel_in_catalog	ENSSSCG00025003953	novel	8416	47	NA	NA	-10	0	intron_retention	FALSE	canonical	NA	NA	NA	NA	NA	NA	NA	TRUE	NA	NA	NA	B	coding	2639	7920	233	8152	23352	1922	FALSE	10	GAGGGTGGCTTGAGCTTTGT	NA	NA	NA	NA	AATAAA	-18_x000D_
PB.7530.51	LUXX01003968.1	-	3350	14	novel_in_catalog	ENSSSCG00025003953	novel	8416	47	NA	NA	19199	0	intron_retention	FALSE	canonical	NA	NA	NA	NA	NA	NA	NA	TRUE	NA	NA	NA	B	coding	503	1512	58	1569	7268	4602	TRUE	10	GAGGGTGGCTTGAGCTTTGT	NA	NA	NA	NA	AATAAA	-18_x000D_
PB.7530.53	LUXX01003968.1	-	8516	48	novel_in_catalog	ENSSSCG00025003953	novel	8961	49	NA	NA	1680	-1	intron_retention	FALSE	canonical	NA	NA	NA	NA	NA	NA	NA	TRUE	NA	NA	NA	B	coding	2647	7944	254	8197	23352	1922	FALSE	10	TGAGGGTGGCTTGAGCTTTG	NA	NA	NA	NA	AATAAA	-17_x000D_
PB.7530.59	LUXX01003968.1	-	8616	48	novel_in_catalog	ENSSSCG00025003953	novel	8937	48	NA	NA	-10	2	intron_retention	FALSE	canonical	NA	NA	NA	NA	NA	NA	NA	TRUE	NA	NA	NA	B	coding	2639	7920	380	8299	23352	1922	FALSE	10	CCTGAGGGTGGCTTGAGCTT	NA	NA	NA	NA	AATAAA	-15_x000D_
PB.7531.1	LUXX01003968.1	+	1245	6	full-splice_match	ENSSSCG00025004278	ENSSSCT00025005688	1429	6	182	2	4	0	multi-exon	FALSE	canonical	NA	NA	NA	NA	NA	NA	NA	TRUE	NA	NA	NA	A	coding	260	783	102	884	31512	33287	FALSE	25	AACACAGGCTCTTCTCTTTA	NA	NA	NA	NA	AATAAA	-17_x000D_
PB.2683.2	LUXX01004143.1	-	6435	16	full-splice_match	ENSSSCG00025001007	ENSSSCT00025001226	8488	16	275	1778	275	-1778	multi-exon	FALSE	canonical	NA	NA	NA	NA	NA	NA	NA	TRUE	NA	NA	NA	A	coding	2032	6099	52	6150	2269185	2207812	FALSE	20	AGTTTTATTCCTTAATTGGT	NA	NA	NA	NA	AATAAA	-15_x000D_
PB.2684.1	LUXX01004143.1	-	4542	6	novel_in_catalog	ENSSSCG00025001136	novel	4316	7	NA	NA	-1	63	intron_retention	FALSE	canonical	NA	NA	NA	NA	NA	NA	NA	TRUE	NA	NA	NA	C	coding	173	522	676	1197	2328257	2323758	FALSE	30	ACAAAATGTTTCTGCATTGT	NA	NA	NA	NA	ATTAAA	-17_x000D_
PB.2684.2	LUXX01004143.1	-	3721	6	novel_in_catalog	ENSSSCG00025001136	novel	4316	7	NA	NA	-38	-710	intron_retention	FALSE	canonical	NA	NA	NA	NA	NA	NA	NA	TRUE	NA	NA	NA	C	coding	173	522	628	1149	2328257	2323758	FALSE	35	ATCAAACTTTCATTTATTAT	NA	NA	NA	NA	AATAAA	-24_x000D_
PB.2684.3	LUXX01004143.1	-	3379	6	novel_in_catalog	ENSSSCG00025001136	novel	4316	7	NA	NA	-21	417	intron_retention	FALSE	canonical	NA	NA	NA	NA	NA	NA	NA	TRUE	NA	NA	NA	C	coding	173	522	611	1132	2328257	2323758	FALSE	40	AAACACTTGTATCTTGTAAA	NA	NA	NA	NA	TATAAA	-43_x000D_
PB.2684.4	LUXX01004143.1	-	2980	6	novel_in_catalog	ENSSSCG00025001136	novel	4316	7	NA	NA	-36	3	intron_retention	FALSE	canonical	NA	NA	NA	NA	NA	NA	NA	TRUE	NA	NA	NA	C	coding	173	522	626	1147	2328257	2323758	FALSE	35	ACCTTATGTTTTAAAGAATT	NA	NA	NA	NA	AATAAA	-13_x000D_
PB.2684.5	LUXX01004143.1	-	2501	6	novel_in_catalog	ENSSSCG00025001136	novel	4316	7	NA	NA	-40	-480	intron_retention	FALSE	canonical	NA	NA	NA	NA	NA	NA	NA	TRUE	NA	NA	NA	C	coding	173	522	630	1151	2328257	2323758	FALSE	15	ATTCGAAGTGTGCTTTTTTT	NA	NA	NA	NA	AAAAAG	-31_x000D_
PB.2684.6	LUXX01004143.1	-	2303	5	full-splice_match	ENSSSCG00025001136	ENSSSCT00025001454	2951	5	85	563	0	-563	multi-exon	FALSE	canonical	NA	NA	NA	NA	NA	NA	NA	TRUE	NA	NA	NA	C	coding	148	447	590	1036	2328257	2323758	FALSE	35	ATCTATCATCATTGAAATTG	NA	NA	NA	NA	AATAAA	-12_x000D_
PB.2684.7	LUXX01004143.1	-	2424	6	novel_in_catalog	ENSSSCG00025001136	novel	4316	7	NA	NA	21	-581	intron_retention	FALSE	canonical	NA	NA	NA	NA	NA	NA	NA	TRUE	NA	NA	NA	C	coding	173	522	654	1175	2328257	2323758	FALSE	60	AAATAAATAATGAAATGCAT	NA	NA	NA	NA	NA	NA_x000D_
PB.2684.8	LUXX01004143.1	-	2188	6	novel_in_catalog	ENSSSCG00025001136	novel	4316	7	NA	NA	-1	-839	intron_retention	FALSE	canonical	NA	NA	NA	NA	NA	NA	NA	TRUE	NA	NA	NA	C	coding	173	522	676	1197	2328257	2323758	FALSE	65	AAAAAAAAAAAGAAGTGGGT	NA	NA	NA	NA	NA	NA_x000D_
PB.2685.1	LUXX01004143.1	-	2307	10	novel_in_catalog	ENSSSCG00025001600	novel	7679	16	NA	NA	-10	-2196	combination_of_known_junctions	FALSE	canonical	NA	NA	NA	NA	NA	NA	NA	TRUE	NA	NA	NA	A	coding	578	1737	381	2117	2560729	2541079	FALSE	15	AGATTTTGTATTTCTTGTCT	NA	NA	NA	NA	AATAAA	-19_x000D_
PB.2686.1	LUXX01004143.1	+	3743	15	novel_in_catalog	ENSSSCG00025002608	novel	3994	15	NA	NA	37	2	combination_of_known_junctions	FALSE	canonical	NA	NA	NA	NA	NA	NA	NA	TRUE	NA	NA	NA	A	coding	708	2127	49	2175	3125515	3194341	FALSE	5	CCGTGCCCCTCTCTCTCATT	NA	NA	NA	NA	AATAAA	-14_x000D_
PB.2687.1	LUXX01004143.1	-	3168	8	novel_in_catalog	ENSSSCG00025002720	novel	3994	9	NA	NA	4	-2	intron_retention	FALSE	canonical	NA	NA	NA	NA	NA	NA	NA	TRUE	NA	NA	NA	B	coding	455	1368	213	1580	3258478	3214592	FALSE	45	AACATTGCCTCTAAGCAAAA	NA	NA	NA	NA	ATTAAA	-15_x000D_
PB.2687.2	LUXX01004143.1	-	1977	8	incomplete-splice_match	ENSSSCG00025002720	ENSSSCT00025003580	3994	9	14	2114	6	-1191	3prime_fragment	FALSE	canonical	NA	NA	NA	NA	NA	NA	NA	TRUE	NA	NA	NA	B	coding	455	1368	211	1578	3258478	3214592	FALSE	35	CATATTCCAGAATGTTAAGT	NA	NA	NA	NA	AATAAA	-14_x000D_
PB.2688.1	LUXX01004143.1	+	3730	5	full-splice_match	ENSSSCG00025002809	ENSSSCT00025003691	3740	5	13	-3	13	3	multi-exon	FALSE	canonical	NA	NA	NA	NA	NA	NA	NA	TRUE	NA	NA	NA	C	coding	293	882	173	1054	3311853	3338198	FALSE	30	TATAGTATTATGTGAATGCT	NA	NA	NA	NA	AATAAA	-23_x000D_
PB.2688.2	LUXX01004143.1	+	2497	5	full-splice_match	ENSSSCG00025002809	ENSSSCT00025003691	3740	5	13	1230	13	-1230	multi-exon	FALSE	canonical	NA	NA	NA	NA	NA	NA	NA	TRUE	NA	NA	NA	C	coding	293	882	173	1054	3311853	3338198	FALSE	40	AAAATAAATTTTGGTTCAGT	NA	NA	NA	NA	AATAAA	-7_x000D_
PB.3455.1	LUXX01004299.1	-	5160	29	novel_in_catalog	ENSSSCG00025000967	novel	5297	30	NA	NA	-12	-3	combination_of_known_splicesites	FALSE	canonical	NA	NA	NA	NA	NA	NA	NA	TRUE	NA	NA	NA	A	coding	931	2796	213	3008	1200665	1111398	FALSE	35	AAAATATATTTCTGTTTCAG	NA	NA	NA	NA	AATAAA	-13_x000D_
PB.3456.1	LUXX01004299.1	+	5461	29	novel_in_catalog	ENSSSCG00025001310	novel	5612	30	NA	NA	-6	-1	combination_of_known_junctions	FALSE	canonical	NA	NA	NA	NA	NA	NA	NA	TRUE	NA	NA	NA	B	coding	1211	3636	247	3882	1209200	1317012	FALSE	5	ACTTGTTTTGGTTTTGGTTT	NA	NA	NA	NA	AATAAA	-13_x000D_
PB.3456.2	LUXX01004299.1	+	4305	29	novel_in_catalog	ENSSSCG00025001310	novel	5612	30	NA	NA	-6	-1154	combination_of_known_junctions	FALSE	canonical	NA	NA	NA	NA	NA	NA	NA	TRUE	NA	NA	NA	B	coding	1211	3636	247	3882	1209200	1317012	FALSE	50	TATGAAAGAATAATGCAGAC	NA	NA	NA	NA	AATAAA	-27_x000D_
PB.3457.1	LUXX01004299.1	-	2957	11	full-splice_match	ENSSSCG00025002926	ENSSSCT00025003933	2924	11	-23	-10	2	10	multi-exon	FALSE	canonical	NA	NA	NA	NA	NA	NA	NA	TRUE	NA	NA	NA	C	coding	444	1335	222	1556	2293257	2257304	FALSE	15	TATATTCTGTGTATGCTTCT	NA	NA	NA	NA	AGTAAA	-22_x000D_
PB.3457.2	LUXX01004299.1	-	1805	11	full-splice_match	ENSSSCG00025002926	ENSSSCT00025003933	2924	11	-11	1130	-11	-24	multi-exon	FALSE	canonical	NA	NA	NA	NA	NA	NA	NA	TRUE	NA	NA	NA	C	coding	444	1335	210	1544	2293257	2257304	FALSE	80	AAAAAGCAAAAAGAAAAAGA	NA	NA	NA	NA	AAAAAG	-18_x000D_
PB.3458.1	LUXX01004299.1	+	1866	8	full-splice_match	ENSSSCG00025003622	ENSSSCT00025004829	1589	8	13	-290	13	290	multi-exon	TRUE	canonical	NA	NA	NA	NA	NA	NA	NA	TRUE	NA	NA	NA	A	coding	415	1248	63	1310	2623156	2633235	FALSE	25	TAACCATTTGTTTGTTATCA	NA	NA	NA	NA	AATAAA	-13_x000D_
PB.3459.1	LUXX01004299.1	+	3076	7	full-splice_match	ENSSSCG00025003753	ENSSSCT00025004955	3128	7	54	-2	54	2	multi-exon	FALSE	canonical	NA	NA	NA	NA	NA	NA	NA	TRUE	NA	NA	NA	C	coding	374	1125	91	1215	2673266	2683205	FALSE	40	AAGTATTGTATCATAATTCA	NA	NA	NA	NA	AATAAA	-16_x000D_
PB.3459.2	LUXX01004299.1	+	1323	7	full-splice_match	ENSSSCG00025003753	ENSSSCT00025004955	3128	7	65	1740	65	-1740	multi-exon	FALSE	canonical	NA	NA	NA	NA	NA	NA	NA	TRUE	NA	NA	NA	C	coding	374	1125	80	1204	2673266	2683205	FALSE	30	TAGGACCCACCTCATAGAGT	NA	NA	NA	NA	AATAAA	-16_x000D_
PB.7366.1	LUXX01004323.1	-	2329	10	novel_in_catalog	ENSSSCG00025003931	novel	2387	10	NA	NA	-2	0	combination_of_known_junctions	FALSE	canonical	NA	NA	NA	NA	NA	NA	NA	TRUE	NA	NA	NA	B	coding	328	987	26	1012	200759	165322	FALSE	0	GTCTTTTTGTTGTTGTTGCT	NA	NA	NA	NA	AATAAA	-15_x000D_
PB.7366.2	LUXX01004323.1	-	1613	10	novel_in_catalog	ENSSSCG00025003931	novel	2387	10	NA	NA	0	-714	combination_of_known_junctions	FALSE	canonical	NA	NA	NA	NA	NA	NA	NA	TRUE	NA	NA	NA	B	coding	328	987	24	1010	200759	165322	FALSE	40	AAAATATTTTTGTGTATAAT	NA	NA	NA	NA	AATAAA	-7_x000D_
PB.7366.3	LUXX01004323.1	-	1784	2	incomplete-splice_match	ENSSSCG00025003931	ENSSSCT00025005173	2258	9	0	20551	0	-20548	3prime_fragment	FALSE	canonical	NA	NA	NA	NA	NA	NA	NA	TRUE	NA	NA	NA	B	non_coding	NA	NA	NA	NA	NA	NA	NA	75	AAAAGGAAAAGAAAAATATA	NA	NA	NA	NA	NA	NA_x000D_
PB.7367.1	LUXX01004323.1	+	1727	11	incomplete-splice_match	ENSSSCG00025004016	ENSSSCT00025005321	2914	15	-28	7787	-9	-7787	3prime_fragment	FALSE	canonical	NA	NA	NA	NA	NA	NA	NA	TRUE	NA	NA	NA	A	coding	545	1635	92	1726	221172	250935	FALSE	70	AAAAAAGAAAAGAAATTGAT	NA	NA	NA	NA	NA	NA_x000D_
PB.7474.1	LUXX01004469.1	-	2145	5	full-splice_match	ENSSSCG00025014662	ENSSSCT00025019560	3404	5	-27	1286	-27	2	multi-exon	FALSE	canonical	NA	NA	NA	NA	NA	NA	NA	TRUE	NA	NA	NA	A	coding	224	675	101	775	75746	40383	FALSE	30	AAATGCTGACTGAGTGCCTA	NA	NA	NA	NA	AATAAA	-18_x000D_
PB.4270.1	LUXX01004567.1	+	2523	4	incomplete-splice_match	ENSSSCG00025000693	ENSSSCT00025000862	3184	6	7247	16	7247	-16	5prime_fragment	FALSE	canonical	NA	NA	NA	NA	NA	NA	NA	TRUE	NA	NA	NA	A	coding	426	1281	89	1369	33947	40679	FALSE	90	AAAAAAAAAAAAAAAAGAAT	NA	NA	NA	NA	NA	NA_x000D_
PB.4271.1	LUXX01004567.1	+	1242	4	full-splice_match	ENSSSCG00025000856	ENSSSCT00025001022	1236	4	-6	0	-6	0	multi-exon	FALSE	canonical	NA	NA	NA	NA	NA	NA	NA	TRUE	NA	NA	NA	A	coding	244	735	124	858	80755	92298	FALSE	45	AAACAACTTTAATATCTTTA	NA	NA	NA	NA	AATAAA	-10_x000D_
PB.4272.1	LUXX01004567.1	+	2386	11	incomplete-splice_match	ENSSSCG00025001101	ENSSSCT00025001379	1998	13	-39	6550	-35	-6550	3prime_fragment	FALSE	canonical	NA	NA	NA	NA	NA	NA	NA	TRUE	NA	NA	NA	A	coding	445	1338	86	1423	148943	179617	FALSE	25	AGCACTGTGACTTTGATCCA	NA	NA	NA	NA	AATAAA	-15_x000D_
PB.4273.1	LUXX01004567.1	+	1843	1	novel_in_catalog	ENSSSCG00025001631	novel	5141	27	NA	NA	194671	-133494	mono-exon	FALSE	NA	NA	NA	NA	NA	NA	NA	NA	NA	NA	NA	NA	A	non_coding	NA	NA	NA	NA	NA	NA	NA	85	CAAAAAAAAAAAAAAAAATC	NA	NA	NA	NA	NA	NA_x000D_
PB.4274.1	LUXX01004567.1	-	4096	7	incomplete-splice_match	ENSSSCG00025002274	ENSSSCT00025002964	6408	18	-4	99042	-4	-3207	3prime_fragment	FALSE	canonical	NA	NA	NA	NA	NA	NA	NA	TRUE	NA	NA	NA	A	coding	859	2580	101	2680	1157217	1079482	FALSE	15	TATTGCCTTGAGGTACTTTT	NA	NA	NA	NA	ATTAAA	-17_x000D_
PB.5957.1	LUXX01004571.1	+	4261	10	novel_in_catalog	ENSSSCG00025002909	novel	4244	10	NA	NA	-3	-1	combination_of_known_junctions	FALSE	canonical	NA	NA	NA	NA	NA	NA	NA	TRUE	NA	NA	NA	B	coding	306	921	141	1061	92532	95142	TRUE	5	ATTTTTTTTTGTGGCCCTGG	NA	NA	NA	NA	AATAAA	-12_x000D_
PB.5957.2	LUXX01004571.1	+	2405	10	novel_in_catalog	ENSSSCG00025002909	novel	4244	10	NA	NA	-3	-1	combination_of_known_junctions	FALSE	canonical	NA	NA	NA	NA	NA	NA	NA	TRUE	NA	NA	NA	B	coding	288	867	141	1007	92532	97836	TRUE	5	ATTTTTTTTTGTGGCCCTGG	NA	NA	NA	NA	AATAAA	-12_x000D_
PB.5957.3	LUXX01004571.1	+	2007	9	novel_not_in_catalog	ENSSSCG00025002909	novel	4244	10	NA	NA	-3	-2319	intron_retention	FALSE	canonical	NA	NA	NA	NA	NA	NA	NA	TRUE	NA	NA	NA	B	coding	390	1173	141	1313	92532	96022	FALSE	45	AAAACCAACCATGAAGCTGC	NA	NA	NA	NA	AATAAA	-11_x000D_
PB.5957.4	LUXX01004571.1	+	3630	11	novel_not_in_catalog	ENSSSCG00025002909	novel	4244	10	NA	NA	0	-1	intron_retention	FALSE	canonical	NA	NA	NA	NA	NA	NA	NA	TRUE	NA	NA	NA	B	coding	390	1173	138	1310	92532	96022	TRUE	5	ATTTTTTTTTGTGGCCCTGG	NA	NA	NA	NA	AATAAA	-12_x000D_
PB.5958.1	LUXX01004571.1	+	2999	1	novel_in_catalog	ENSSSCG00025023645	novel	2652	27	NA	NA	8931	-33675	mono-exon_by_intron_retention	FALSE	NA	NA	NA	NA	NA	NA	NA	NA	NA	NA	NA	NA	A	non_coding	NA	NA	NA	NA	NA	NA	NA	55	AAAAAAAAAAAGTCCCTTTT	NA	NA	NA	NA	NA	NA_x000D_
PB.5959.1	LUXX01004571.1	-	2500	8	novel_not_in_catalog	ENSSSCG00025024535	novel	2415	8	NA	NA	4	-2	at_least_one_novel_splicesite	FALSE	canonical	NA	NA	NA	NA	NA	NA	NA	TRUE	NA	NA	NA	B	coding	280	843	320	1162	704995	701755	FALSE	35	AAAGAACCTGCCTCATGACT	NA	NA	NA	NA	AATAAA	-10_x000D_
PB.5959.2	LUXX01004571.1	-	2406	7	novel_in_catalog	ENSSSCG00025024535	novel	2415	8	NA	NA	4	-2	combination_of_known_junctions	FALSE	canonical	NA	NA	NA	NA	NA	NA	NA	TRUE	NA	NA	NA	B	coding	280	843	226	1068	704995	701755	FALSE	35	AAAGAACCTGCCTCATGACT	NA	NA	NA	NA	AATAAA	-10_x000D_
PB.5959.3	LUXX01004571.1	-	2426	7	novel_in_catalog	ENSSSCG00025024535	novel	2654	8	NA	NA	32	-2	combination_of_known_junctions	FALSE	canonical	NA	NA	NA	NA	NA	NA	NA	TRUE	NA	NA	NA	B	coding	280	843	246	1088	704995	701755	FALSE	35	AAAGAACCTGCCTCATGACT	NA	NA	NA	NA	AATAAA	-10_x000D_
PB.5959.4	LUXX01004571.1	-	2306	6	novel_in_catalog	ENSSSCG00025024535	novel	2415	8	NA	NA	3	-2	combination_of_known_splicesites	FALSE	canonical	NA	NA	NA	NA	NA	NA	NA	TRUE	NA	NA	NA	B	coding	280	843	126	968	704995	701755	FALSE	35	AAAGAACCTGCCTCATGACT	NA	NA	NA	NA	AATAAA	-10_x000D_
PB.5959.5	LUXX01004571.1	-	2220	6	novel_in_catalog	ENSSSCG00025024535	novel	2415	8	NA	NA	3	-2	combination_of_known_junctions	FALSE	canonical	NA	NA	NA	NA	NA	NA	NA	TRUE	NA	NA	NA	B	coding	194	585	227	811	704995	701826	FALSE	35	AAAGAACCTGCCTCATGACT	NA	NA	NA	NA	AATAAA	-10_x000D_
PB.5960.3	LUXX01004571.1	-	4094	17	novel_in_catalog	ENSSSCG00025025450	novel	4549	18	NA	NA	0	-362	intron_retention	FALSE	canonical	NA	NA	NA	NA	NA	NA	NA	TRUE	NA	NA	NA	A	coding	649	1950	93	2042	893936	837777	FALSE	80	AAAGAAGAAAAAAAGAGAAA	NA	NA	NA	NA	NA	NA_x000D_
PB.5961.1	LUXX01004571.1	+	3231	4	full-splice_match	ENSSSCG00025026087	ENSSSCT00025035281	4746	4	28	1487	28	-1487	multi-exon	FALSE	canonical	NA	NA	NA	NA	NA	NA	NA	TRUE	NA	NA	NA	A	coding	131	396	74	469	912470	922163	FALSE	10	ACCCTGTTTTTGGTAGTGGT	NA	NA	NA	NA	AATAAA	-15_x000D_
PB.5962.1	LUXX01004571.1	-	3817	17	incomplete-splice_match	ENSSSCG00025026270	ENSSSCT00025036320	3599	18	-10	-4	-9	-1	intron_retention	FALSE	canonical	NA	NA	NA	NA	NA	NA	NA	TRUE	NA	NA	NA	A	coding	861	2586	374	2959	1058841	998481	FALSE	40	ATTAACGCTCAAGAAACTTC	NA	NA	NA	NA	AATAAA	-27_x000D_
PB.5963.1	LUXX01004571.1	-	2145	6	novel_not_in_catalog	ENSSSCG00025027225	novel	2216	6	NA	NA	-10	2	at_least_one_novel_splicesite	FALSE	canonical	NA	NA	NA	NA	NA	NA	NA	TRUE	NA	NA	NA	B	coding	525	1578	364	1941	1178068	1167170	FALSE	15	ATATCCGGCGTTACCTCTCT	NA	NA	NA	NA	AATAAA	-20_x000D_
PB.5963.2	LUXX01004571.1	-	1334	3	novel_not_in_catalog	ENSSSCG00025027225	novel	2216	6	NA	NA	-14	0	at_least_one_novel_splicesite	FALSE	canonical	NA	NA	NA	NA	NA	NA	NA	TRUE	NA	NA	NA	B	coding	263	792	341	1132	1175060	1167170	FALSE	15	GTATATCCGGCGTTACCTCT	NA	NA	NA	NA	AATAAA	-18_x000D_
PB.5176.1	LUXX01004627.1	-	1743	16	incomplete-splice_match	ENSSSCG00025027882	ENSSSCT00025041199	4515	37	150	58325	119	-58325	3prime_fragment	FALSE	canonical	NA	NA	NA	NA	NA	NA	NA	TRUE	NA	NA	NA	A	coding	574	1722	21	1742	124380	80812	FALSE	30	GTTTTCATTCAAAGTGGCAA	NA	NA	NA	NA	AAGAAA	-40_x000D_
PB.5177.1	LUXX01004627.1	+	4106	21	full-splice_match	ENSSSCG00025031029	ENSSSCT00025043375	5834	21	-57	1785	-7	0	multi-exon	TRUE	canonical	NA	NA	NA	NA	NA	NA	NA	TRUE	NA	NA	NA	C	coding	1057	3174	150	3323	173814	267673	FALSE	30	ACATAAGCAGTTTGCATCTT	NA	NA	NA	NA	AATAAA	-21_x000D_
PB.5177.2	LUXX01004627.1	+	3990	20	novel_in_catalog	ENSSSCG00025031029	novel	5834	21	NA	NA	0	2	combination_of_known_splicesites	FALSE	canonical	NA	NA	NA	NA	NA	NA	NA	TRUE	NA	NA	NA	C	coding	1022	3069	135	3203	173814	267673	FALSE	25	AAGCAGTTTGCATCTTTTTA	NA	NA	NA	NA	AATAAA	-25_x000D_
PB.5178.1	LUXX01004627.1	+	3629	8	novel_in_catalog	ENSSSCG00025032256	novel	6286	9	NA	NA	21	-1194	combination_of_known_splicesites	FALSE	canonical	NA	NA	NA	NA	NA	NA	NA	TRUE	NA	NA	NA	B	coding	310	933	431	1363	324563	333117	FALSE	55	AAAATTTTAAAACCCAGGAA	NA	NA	NA	NA	AAGAAA	-9_x000D_
PB.5178.2	LUXX01004627.1	+	4811	8	novel_in_catalog	ENSSSCG00025032256	novel	6286	9	NA	NA	36	3	combination_of_known_splicesites	FALSE	canonical	NA	NA	NA	NA	NA	NA	NA	TRUE	NA	NA	NA	B	coding	310	933	416	1348	324563	333117	FALSE	25	AAAAAGTGGTCTTTGTCTTG	NA	NA	NA	NA	AATAAA	-12_x000D_
PB.5178.3	LUXX01004627.1	+	3201	8	novel_in_catalog	ENSSSCG00025032256	novel	6286	9	NA	NA	85	1232	combination_of_known_splicesites	FALSE	canonical	NA	NA	NA	NA	NA	NA	NA	TRUE	NA	NA	NA	B	coding	310	933	367	1299	324563	333117	FALSE	35	AAATGTCATGACAGTTACTC	NA	NA	NA	NA	AATAAA	-16_x000D_
PB.5178.4	LUXX01004627.1	+	4566	7	novel_in_catalog	ENSSSCG00025032256	novel	6286	9	NA	NA	179	11	combination_of_known_splicesites	FALSE	canonical	NA	NA	NA	NA	NA	NA	NA	TRUE	NA	NA	NA	B	coding	310	933	163	1095	324563	333117	FALSE	0	GTCTTTGTCTTGCCTCTTTT	NA	NA	NA	NA	AATAAA	-20_x000D_
PB.5178.5	LUXX01004627.1	+	3764	3	incomplete-splice_match	ENSSSCG00025032256	ENSSSCT00025043840	6286	9	15881	-2	4978	2	5prime_fragment	FALSE	canonical	NA	NA	NA	NA	NA	NA	NA	TRUE	NA	NA	NA	B	coding	99	300	3	302	329375	333117	FALSE	25	TAAAAAGTGGTCTTTGTCTT	NA	NA	NA	NA	AATAAA	-11_x000D_
PB.5179.1	LUXX01004627.1	+	902	4	incomplete-splice_match	ENSSSCG00025032448	ENSSSCT00025044164	2651	5	-32	3557	-11	413	3prime_fragment	FALSE	canonical	NA	NA	NA	NA	NA	NA	NA	TRUE	NA	NA	NA	B	coding	142	429	61	489	339749	354225	FALSE	40	TAAAGAAAGGATGCTGGAGC	NA	NA	NA	NA	ATTAAA	-29_x000D_
PB.5179.2	LUXX01004627.1	+	2224	4	incomplete-splice_match	ENSSSCG00025032448	ENSSSCT00025044164	2651	5	-9	2212	-9	1758	3prime_fragment	FALSE	canonical	NA	NA	NA	NA	NA	NA	NA	TRUE	NA	NA	NA	B	coding	142	429	38	466	339749	354225	FALSE	40	ATACACTATGGCCCAGTAAA	NA	NA	NA	NA	ATTAAA	-22_x000D_
PB.5179.3	LUXX01004627.1	+	1885	4	incomplete-splice_match	ENSSSCG00025032448	ENSSSCT00025044164	2651	5	5	2537	5	1433	3prime_fragment	FALSE	canonical	NA	NA	NA	NA	NA	NA	NA	TRUE	NA	NA	NA	B	coding	142	429	24	452	339749	354225	FALSE	85	CAAAAAGAAAAAAGAAAAAA	NA	NA	NA	NA	AAGAAA	-5_x000D_
PB.5180.1	LUXX01004627.1	+	5869	6	incomplete-splice_match	ENSSSCG00025032970	ENSSSCT00025045168	5108	15	4	46850	0	-46850	3prime_fragment	FALSE	canonical	NA	NA	NA	NA	NA	NA	NA	TRUE	NA	NA	NA	B	coding	326	981	182	1162	422603	428960	FALSE	80	TAAAAAGAAGAAGAAAAAAA	NA	NA	NA	NA	NA	NA_x000D_
PB.5180.2	LUXX01004627.1	+	4602	22	novel_in_catalog	ENSSSCG00025032970	novel	4658	23	NA	NA	0	2	combination_of_known_junctions	FALSE	canonical	NA	NA	NA	NA	NA	NA	NA	TRUE	NA	NA	NA	B	coding	1145	3438	755	4192	428553	498662	FALSE	45	AAAACAACTAGTTGTCAAGT	NA	NA	NA	NA	AATACA	-28_x000D_
PB.5180.3	LUXX01004627.1	+	1737	15	incomplete-splice_match	ENSSSCG00025032970	ENSSSCT00025045406	4491	21	16	18325	16	228	3prime_fragment	FALSE	canonical	NA	NA	NA	NA	NA	NA	NA	TRUE	NA	NA	NA	B	coding	524	1572	166	1737	422603	480745	FALSE	55	AGAAAAGAAGACATTAAGTT	NA	NA	NA	NA	NA	NA_x000D_
PB.5180.4	LUXX01004627.1	+	1150	6	incomplete-splice_match	ENSSSCG00025032970	ENSSSCT00025045168	5108	15	20	51553	16	-51553	3prime_fragment	FALSE	canonical	NA	NA	NA	NA	NA	NA	NA	TRUE	NA	NA	NA	B	coding	326	981	166	1146	422603	428960	FALSE	60	ACAACTGAATAAAATCTAAA	NA	NA	NA	NA	AATAAA	-20_x000D_
PB.5181.1	LUXX01004627.1	-	2821	1	full-splice_match	ENSSSCG00025033515	ENSSSCT00025045605	1511	1	-13	-1297	-13	1297	mono-exon	FALSE	NA	NA	NA	NA	NA	NA	NA	NA	NA	NA	NA	NA	A	coding	219	660	27	686	503166	502507	NA	35	AGTTTCTGTAAATGAATTCA	NA	NA	NA	NA	AATAAA	-20_x000D_
PB.5182.1	LUXX01004627.1	+	1756	10	incomplete-splice_match	ENSSSCG00025033778	ENSSSCT00025046267	1584	11	285	-2	-13	1	intron_retention	FALSE	canonical	NA	NA	NA	NA	NA	NA	NA	TRUE	NA	NA	NA	A	coding	341	1026	118	1143	532337	568162	FALSE	10	ACCCCCGAGGCCTGTGTGGT	NA	NA	NA	NA	AATGAA	-19_x000D_
PB.5183.1	LUXX01004627.1	+	1696	4	incomplete-splice_match	ENSSSCG00025035074	ENSSSCT00025047865	3214	15	20	25942	0	-25942	3prime_fragment	FALSE	canonical	NA	NA	NA	NA	NA	NA	NA	TRUE	NA	NA	NA	B	coding	478	1434	263	1696	682443	709215	FALSE	75	AAAAAAAATGAAGAGAAAGA	NA	NA	NA	NA	NA	NA_x000D_
PB.5183.2	LUXX01004627.1	+	1475	3	incomplete-splice_match	ENSSSCG00025035074	ENSSSCT00025047865	3214	15	20	26984	0	-26984	3prime_fragment	FALSE	canonical	NA	NA	NA	NA	NA	NA	NA	TRUE	NA	NA	NA	B	coding	404	1212	263	1474	682443	708172	FALSE	55	AAGATGAAGAAAAAGAGGGG	NA	NA	NA	NA	NA	NA_x000D_
PB.5183.3	LUXX01004627.1	+	3032	14	incomplete-splice_match	ENSSSCG00025035074	ENSSSCT00025047960	5997	15	7	3554	7	2	3prime_fragment	FALSE	canonical	NA	NA	NA	NA	NA	NA	NA	TRUE	NA	NA	NA	B	coding	847	2544	251	2794	682443	734924	FALSE	5	GGGGCTGTCTCTTCATTGTC	NA	NA	NA	NA	AATAAA	-19_x000D_
PB.5184.1	LUXX01004627.1	-	948	1	intergenic	novelGene_406	novel	NA	NA	NA	NA	NA	NA	mono-exon	FALSE	NA	NA	NA	NA	NA	NA	NA	NA	NA	NA	NA	NA	A	non_coding	NA	NA	NA	NA	NA	NA	NA	85	AAAAAAAAAAAAAAAGTAAT	NA	NA	NA	NA	ATTAAA	-38_x000D_
PB.5185.1	LUXX01004627.1	-	2729	1	intergenic	novelGene_407	novel	NA	NA	NA	NA	NA	NA	mono-exon	FALSE	NA	NA	NA	NA	NA	NA	NA	NA	NA	NA	NA	NA	A	coding	118	357	735	1091	1158878	1158522	NA	100	AAAAAAAAAAAAAAAAAAAA	NA	NA	NA	NA	NA	NA_x000D_
PB.5186.1	LUXX01004627.1	+	3206	11	incomplete-splice_match	ENSSSCG00025035560	ENSSSCT00025048585	5332	27	309619	-10	123972	8	5prime_fragment	FALSE	canonical	NA	NA	NA	NA	NA	NA	NA	TRUE	NA	NA	NA	A	coding	351	1056	89	1144	1225391	1241792	FALSE	25	TAACATGTTGTAGTCTTTCA	NA	NA	NA	NA	AATAAA	-22_x000D_
PB.5187.1	LUXX01004627.1	-	3706	25	novel_not_in_catalog	ENSSSCG00025038618	novel	8773	26	NA	NA	1117	2212	intron_retention	FALSE	canonical	NA	NA	NA	NA	NA	NA	NA	TRUE	NA	NA	NA	B	coding	719	2160	611	2770	1269642	1250660	FALSE	25	TACTAGTATTTATTTCTACT	NA	NA	NA	NA	ATTAAA	-18_x000D_
PB.5187.2	LUXX01004627.1	-	2834	25	novel_not_in_catalog	ENSSSCG00025038618	novel	8773	26	NA	NA	1085	1296	intron_retention	FALSE	canonical	NA	NA	NA	NA	NA	NA	NA	TRUE	NA	NA	NA	B	coding	723	2172	643	2814	1269642	1250660	FALSE	40	AGTATGATTTAAAGTCTAAT	NA	NA	NA	NA	AATAAA	-20_x000D_
PB.5187.3	LUXX01004627.1	-	2801	25	novel_not_in_catalog	ENSSSCG00025038618	novel	8773	26	NA	NA	1104	1294	intron_retention	FALSE	canonical	NA	NA	NA	NA	NA	NA	NA	TRUE	NA	NA	NA	B	coding	719	2160	624	2783	1269642	1250660	FALSE	40	ACAGTATGATTTAAAGTCTA	NA	NA	NA	NA	AATAAA	-18_x000D_
PB.5187.4	LUXX01004627.1	-	2561	24	novel_not_in_catalog	ENSSSCG00025038618	novel	8773	26	NA	NA	1137	-277	intron_retention	FALSE	canonical	NA	NA	NA	NA	NA	NA	NA	TRUE	NA	NA	NA	B	coding	657	1971	591	2561	1269642	1252213	FALSE	65	AAAAAAGAAAAAGACCGGGA	NA	NA	NA	NA	NA	NA_x000D_
PB.5187.5	LUXX01004627.1	-	2482	23	novel_not_in_catalog	ENSSSCG00025038618	novel	8773	26	NA	NA	1137	-1504	intron_retention	FALSE	canonical	NA	NA	NA	NA	NA	NA	NA	TRUE	NA	NA	NA	B	coding	630	1890	591	2480	1269642	1253442	FALSE	80	AAAAAAACATAAGAAGAAAA	NA	NA	NA	NA	AAGAAA	-3_x000D_
PB.5187.6	LUXX01004627.1	-	2398	22	novel_not_in_catalog	ENSSSCG00025038618	novel	8773	26	NA	NA	1137	-1671	intron_retention	FALSE	canonical	NA	NA	NA	NA	NA	NA	NA	TRUE	NA	NA	NA	B	coding	602	1806	591	2396	1269642	1253609	FALSE	70	AAAGAAAAAAAGACAGAGAT	NA	NA	NA	NA	NA	NA_x000D_
PB.5187.7	LUXX01004627.1	-	1230	12	novel_not_in_catalog	ENSSSCG00025038618	novel	8686	25	NA	NA	1126	-12921	intron_retention	FALSE	canonical	NA	NA	NA	NA	NA	NA	NA	TRUE	NA	NA	NA	B	coding	303	909	320	1228	1273632	1264859	FALSE	75	AGAAAAAGAAGAAAAAGAAG	NA	NA	NA	NA	TATAAA	-9_x000D_
PB.5188.1	LUXX01004627.1	+	1391	4	incomplete-splice_match	ENSSSCG00025040728	ENSSSCT00025055237	3057	8	317	53365	317	-53365	3prime_fragment	FALSE	canonical	NA	NA	NA	NA	NA	NA	NA	TRUE	NA	NA	NA	A	coding	225	678	16	693	1299939	1330617	FALSE	90	AAAAAGAAAAAAAAAAAAAT	NA	NA	NA	NA	NA	NA_x000D_
PB.5860.1	LUXX01004739.1	+	3071	7	incomplete-splice_match	ENSSSCG00025042330	ENSSSCT00025057479	5748	8	1	2971	1	1	3prime_fragment	FALSE	canonical	NA	NA	NA	NA	NA	NA	NA	TRUE	NA	NA	NA	B	coding	245	738	84	821	183442	228572	FALSE	30	TACTTGTGTGTCTAATTAAA	NA	NA	NA	NA	ATTAAA	-14_x000D_
PB.5860.2	LUXX01004739.1	+	4026	7	incomplete-splice_match	ENSSSCG00025042330	ENSSSCT00025057479	5748	8	5	2012	5	960	3prime_fragment	FALSE	canonical	NA	NA	NA	NA	NA	NA	NA	TRUE	NA	NA	NA	B	coding	245	738	80	817	183442	228572	FALSE	20	TGTATGTTGTAGGAATTCTT	NA	NA	NA	NA	ATTAAA	-17_x000D_
PB.5860.3	LUXX01004739.1	+	2338	7	incomplete-splice_match	ENSSSCG00025042330	ENSSSCT00025057479	5748	8	5	3700	5	-728	3prime_fragment	FALSE	canonical	NA	NA	NA	NA	NA	NA	NA	TRUE	NA	NA	NA	B	coding	245	738	80	817	183442	228572	FALSE	35	GGAGTTTTGTAAAAAACCTT	NA	NA	NA	NA	AATAAA	-19_x000D_
PB.3933.1	LUXX01004766.1	-	4479	26	incomplete-splice_match	ENSSSCG00025006725	ENSSSCT00025008942	7611	42	192461	0	192388	0	5prime_fragment	FALSE	canonical	NA	NA	NA	NA	NA	NA	NA	TRUE	NA	NA	NA	B	coding	1237	3714	113	3826	774191	645542	FALSE	40	AAGAAAAGCTGTCTATTTAT	NA	NA	NA	NA	AATAAA	-20_x000D_
PB.3934.1	LUXX01004766.1	-	1355	6	incomplete-splice_match	ENSSSCG00025006725	ENSSSCT00025008978	6620	41	-29	244718	15	-244718	3prime_fragment	FALSE	canonical	NA	NA	NA	NA	NA	NA	NA	TRUE	NA	NA	NA	B	coding	341	1023	332	1354	947777	890379	FALSE	55	GAGAAGAAAAAAGAATTGCC	NA	NA	NA	NA	AATGAA	-12_x000D_
PB.6715.1	LUXX01004870.1	+	1014	6	novel_in_catalog	ENSSSCG00025007229	novel	1126	7	NA	NA	0	-15	combination_of_known_junctions	FALSE	canonical	NA	NA	NA	NA	NA	NA	NA	TRUE	NA	NA	NA	A	coding	236	711	73	783	21028	23900	FALSE	40	ATCAGTGGGAGGACACAAAT	NA	NA	NA	NA	AATAAA	-21_x000D_
PB.6716.1	LUXX01004870.1	-	746	8	full-splice_match	ENSSSCG00025007301	ENSSSCT00025009706	858	8	106	6	-4	-1	multi-exon	TRUE	canonical	NA	NA	NA	NA	NA	NA	NA	TRUE	NA	NA	NA	A	coding	216	651	21	671	31390	24840	FALSE	20	ACGGCCAGCGCTTGCCAGCA	NA	NA	NA	NA	AATAAA	-13_x000D_
PB.6717.1	LUXX01004870.1	-	3392	14	novel_in_catalog	ENSSSCG00025007435	novel	4577	14	NA	NA	-37	0	intron_retention	FALSE	canonical	NA	NA	NA	NA	NA	NA	NA	TRUE	NA	NA	NA	A	coding	631	1896	143	2038	54264	35666	FALSE	5	AGCTCTGCCTGTTTTTTTCT	NA	NA	NA	NA	ATTAAA	-12_x000D_
PB.6718.1	LUXX01004870.1	-	820	3	incomplete-splice_match	ENSSSCG00025007614	ENSSSCT00025010112	3796	11	6113	22	6105	3	5prime_fragment	TRUE	canonical	NA	NA	NA	NA	NA	NA	NA	TRUE	NA	NA	NA	B	coding	138	417	48	464	132789	130150	FALSE	25	AGCTGGTTCCAAGTTCCAGA	NA	NA	NA	NA	AATAAA	-18_x000D_
PB.6719.1	LUXX01004870.1	-	1328	7	incomplete-splice_match	ENSSSCG00025007614	ENSSSCT00025010181	2031	10	2	1800	-1	4	3prime_fragment	TRUE	canonical	NA	NA	NA	NA	NA	NA	NA	TRUE	NA	NA	NA	B	coding	172	519	86	604	137795	136536	FALSE	20	AACCTGCTCTGACCATCTCC	NA	NA	NA	NA	ATTAAA	-15_x000D_
PB.6720.1	LUXX01004870.1	-	1120	4	novel_in_catalog	ENSSSCG00025005859	novel	767	5	NA	NA	28	-1	intron_retention	FALSE	canonical	NA	NA	NA	NA	NA	NA	NA	TRUE	NA	NA	NA	A	coding	168	507	100	606	163273	161576	FALSE	25	ACAAGTGTACGCTGTTTTTA	NA	NA	NA	NA	ATTAAA	-14_x000D_
PB.6721.1	LUXX01004870.1	+	3262	10	novel_not_in_catalog	ENSSSCG00025005878	novel	3638	10	NA	NA	381	2	at_least_one_novel_splicesite	FALSE	canonical	NA	NA	NA	NA	NA	NA	NA	TRUE	NA	NA	NA	A	coding	730	2193	115	2307	168053	173732	FALSE	5	TGCTGGCTCTGAGTTTTCTC	NA	NA	NA	NA	NA	NA_x000D_
PB.6722.1	LUXX01004870.1	+	1876	4	incomplete-splice_match	ENSSSCG00025005942	ENSSSCT00025007931	4776	33	-5	27177	-5	-27139	3prime_fragment	FALSE	canonical	NA	NA	NA	NA	NA	NA	NA	TRUE	NA	NA	NA	A	coding	99	300	215	514	231131	236454	FALSE	100	AAAAAAAAAAAAAAAAAAAA	NA	NA	NA	NA	NA	NA_x000D_
PB.6723.1	LUXX01004870.1	-	790	7	full-splice_match	ENSSSCG00025006055	ENSSSCT00025008095	863	7	55	18	55	-18	multi-exon	FALSE	canonical	NA	NA	NA	NA	NA	NA	NA	TRUE	NA	NA	NA	A	non_coding	NA	NA	NA	NA	NA	NA	NA	10	AGTTCAGTGTTCCTGCTTGC	NA	NA	NA	NA	AATAAA	-16_x000D_
PB.6724.1	LUXX01004870.1	+	1001	7	incomplete-splice_match	ENSSSCG00025006144	ENSSSCT00025008169	1144	8	184	2	-7	0	5prime_fragment	FALSE	canonical	NA	NA	NA	NA	NA	NA	NA	TRUE	NA	NA	NA	A	coding	210	633	17	649	275438	286148	FALSE	40	AATAAATGAGTTCACTCATC	NA	NA	NA	NA	ATTAAA	-10_x000D_
PB.6725.1	LUXX01004870.1	-	1663	7	incomplete-splice_match	ENSSSCG00025006785	ENSSSCT00025009101	8668	54	1	18819	1	-18819	3prime_fragment	FALSE	canonical	NA	NA	NA	NA	NA	NA	NA	TRUE	NA	NA	NA	B	coding	309	930	42	971	330042	321257	FALSE	35	AAATGAAGGTGCAGGAGTTG	NA	NA	NA	NA	AATAAA	-14_x000D_
PB.6725.3	LUXX01004870.1	-	1322	8	novel_not_in_catalog	ENSSSCG00025006785	novel	8668	54	NA	NA	1	-18819	at_least_one_novel_splicesite	FALSE	non_canonical	NA	NA	NA	NA	NA	NA	NA	TRUE	NA	NA	NA	B	coding	309	930	42	971	330042	321257	TRUE	35	AAATGAAGGTGCAGGAGTTG	NA	NA	NA	NA	AATAAA	-14_x000D_
PB.6725.4	LUXX01004870.1	-	1549	8	novel_not_in_catalog	ENSSSCG00025006785	novel	8668	54	NA	NA	-26	-18820	at_least_one_novel_splicesite	FALSE	non_canonical	NA	NA	NA	NA	NA	NA	NA	TRUE	NA	NA	NA	B	coding	309	930	69	998	330042	321257	TRUE	35	GAAATGAAGGTGCAGGAGTT	NA	NA	NA	NA	AATAAA	-13_x000D_
PB.6726.1	LUXX01004870.1	-	1516	10	full-splice_match	ENSSSCG00025007313	ENSSSCT00025009721	1621	10	107	-2	16	2	multi-exon	FALSE	canonical	NA	NA	NA	NA	NA	NA	NA	TRUE	NA	NA	NA	A	coding	432	1299	12	1310	367937	362312	FALSE	10	ATCTCAGTCTCCTTGTGCCG	NA	NA	NA	NA	NA	NA_x000D_
PB.6727.1	LUXX01004870.1	+	4042	16	novel_not_in_catalog	ENSSSCG00025007526	novel	7830	15	NA	NA	-17	-3234	at_least_one_novel_splicesite	FALSE	canonical	NA	NA	NA	NA	NA	NA	NA	TRUE	NA	NA	NA	A	coding	829	2490	148	2637	437091	448648	TRUE	25	AAAATGAGCTTGTTTCTTGC	NA	NA	NA	NA	TTTAAA	-19_x000D_
PB.6728.1	LUXX01004870.1	+	2523	8	full-splice_match	ENSSSCG00025007731	ENSSSCT00025010271	2887	8	-21	385	-21	-385	multi-exon	FALSE	canonical	NA	NA	NA	NA	NA	NA	NA	TRUE	NA	NA	NA	A	coding	731	2196	238	2433	484106	495911	FALSE	10	AGTGTGGCTTTGTCATTTGT	NA	NA	NA	NA	AATAAA	-13_x000D_
PB.6729.1	LUXX01004870.1	-	3166	15	novel_in_catalog	ENSSSCG00025007895	novel	3250	15	NA	NA	-1	0	combination_of_known_junctions	FALSE	canonical	NA	NA	NA	NA	NA	NA	NA	TRUE	NA	NA	NA	B	coding	557	1674	84	1757	507621	497566	FALSE	15	ACTTGATTTTCCCTCTTTAT	NA	NA	NA	NA	AATAAA	-16_x000D_
PB.6729.2	LUXX01004870.1	-	3054	14	novel_in_catalog	ENSSSCG00025007895	novel	3250	15	NA	NA	12	0	combination_of_known_junctions	FALSE	canonical	NA	NA	NA	NA	NA	NA	NA	TRUE	NA	NA	NA	B	coding	531	1596	50	1645	507621	497566	FALSE	15	ACTTGATTTTCCCTCTTTAT	NA	NA	NA	NA	AATAAA	-16_x000D_
PB.6729.6	LUXX01004870.1	-	3064	15	novel_in_catalog	ENSSSCG00025007895	novel	3250	15	NA	NA	-1	0	combination_of_known_junctions	FALSE	canonical	NA	NA	NA	NA	NA	NA	NA	TRUE	NA	NA	NA	B	coding	557	1674	84	1757	507621	497566	FALSE	25	AACAACTCCTACCTTTTCTG	NA	NA	NA	NA	ATTAAA	-11_x000D_
PB.6729.7	LUXX01004870.1	-	2986	14	novel_in_catalog	ENSSSCG00025007895	novel	3250	15	NA	NA	-1	0	combination_of_known_junctions	FALSE	canonical	NA	NA	NA	NA	NA	NA	NA	TRUE	NA	NA	NA	B	coding	531	1596	84	1679	507621	497566	FALSE	25	AACAACTCCTACCTTTTCTG	NA	NA	NA	NA	ATTAAA	-11_x000D_
PB.6729.9	LUXX01004870.1	-	1775	15	novel_in_catalog	ENSSSCG00025007895	novel	3250	15	NA	NA	12	-1255	combination_of_known_junctions	FALSE	canonical	NA	NA	NA	NA	NA	NA	NA	TRUE	NA	NA	NA	B	coding	557	1674	50	1723	507621	497566	FALSE	60	AAAAAAAGCCACTTTAAAAG	NA	NA	NA	NA	NA	NA_x000D_
PB.6730.1	LUXX01004870.1	-	2821	9	novel_not_in_catalog	ENSSSCG00025008156	novel	2869	10	NA	NA	-17	2	intron_retention	FALSE	non_canonical	NA	NA	NA	NA	NA	NA	NA	TRUE	NA	NA	NA	A	coding	248	747	575	1321	575507	565163	FALSE	20	TAGGGCCTGGAGTTCTTGAA	NA	NA	NA	NA	AATAAA	-16_x000D_
PB.6731.1	LUXX01004870.1	-	1877	4	novel_in_catalog	ENSSSCG00025008260	novel	1817	5	NA	NA	25	-5	intron_retention	FALSE	canonical	NA	NA	NA	NA	NA	NA	NA	TRUE	NA	NA	NA	C	coding	292	879	78	956	606881	601953	FALSE	35	AAAAAGCATCTTGGGATGTC	NA	NA	NA	NA	AATAAA	-6_x000D_
PB.6731.2	LUXX01004870.1	-	1787	5	full-splice_match	ENSSSCG00025008260	ENSSSCT00025010995	1817	5	25	5	25	-5	multi-exon	TRUE	canonical	NA	NA	NA	NA	NA	NA	NA	TRUE	NA	NA	NA	C	coding	262	789	78	866	606881	601953	FALSE	35	AAAAAGCATCTTGGGATGTC	NA	NA	NA	NA	AATAAA	-6_x000D_
PB.6731.3	LUXX01004870.1	-	917	1	incomplete-splice_match	ENSSSCG00025008260	ENSSSCT00025010995	1817	5	5035	5	5035	-5	mono-exon	FALSE	NA	NA	NA	NA	NA	NA	NA	NA	NA	NA	NA	NA	C	non_coding	NA	NA	NA	NA	NA	NA	NA	35	AAAAAGCATCTTGGGATGTC	NA	NA	NA	NA	AATAAA	-6_x000D_
PB.6732.1	LUXX01004870.1	+	3754	21	novel_in_catalog	ENSSSCG00025008447	novel	3941	22	NA	NA	-5	0	combination_of_known_junctions	TRUE	canonical	NA	NA	NA	NA	NA	NA	NA	TRUE	NA	NA	NA	A	coding	1219	3660	38	3697	638752	652439	FALSE	15	ACTTAGTGAGTTGCTGCCTC	NA	NA	NA	NA	AATAAA	-12_x000D_
PB.6733.1	LUXX01004870.1	-	1647	8	novel_in_catalog	ENSSSCG00025008556	novel	1700	9	NA	NA	-29	-1	combination_of_known_splicesites	FALSE	canonical	NA	NA	NA	NA	NA	NA	NA	TRUE	NA	NA	NA	A	coding	328	987	50	1036	687184	680067	FALSE	5	TCTCCTGGCTCCTGTTTGCA	NA	NA	NA	NA	AATAAA	-13_x000D_
PB.6734.1	LUXX01004870.1	-	948	5	incomplete-splice_match	ENSSSCG00025008785	ENSSSCT00025011652	1488	6	285	375	285	-375	5prime_fragment	FALSE	canonical	NA	NA	NA	NA	NA	NA	NA	TRUE	NA	NA	NA	A	coding	154	465	166	630	709199	706152	FALSE	10	AGGACCTCGGGGTCCGGGCG	NA	NA	NA	NA	AATAAA	-21_x000D_
PB.7312.1	LUXX01004887.1	-	927	1	intergenic	novelGene_565	novel	NA	NA	NA	NA	NA	NA	mono-exon	FALSE	NA	NA	NA	NA	NA	NA	NA	NA	NA	NA	NA	NA	A	non_coding	NA	NA	NA	NA	NA	NA	NA	100	AAAAAAAAAAAAAAAAAAAA	NA	NA	NA	NA	AAAAAG	-42_x000D_
PB.7313.1	LUXX01004887.1	+	2797	1	incomplete-splice_match	ENSSSCG00025009396	ENSSSCT00025012436	4307	4	52147	2	51704	-2	mono-exon	FALSE	NA	NA	NA	NA	NA	NA	NA	NA	NA	NA	NA	NA	B	non_coding	NA	NA	NA	NA	NA	NA	NA	20	AAGGAGGCTCTTTCATTTCT	NA	NA	NA	NA	AATAAA	-17_x000D_
PB.7313.2	LUXX01004887.1	+	787	1	incomplete-splice_match	ENSSSCG00025009396	ENSSSCT00025012436	4307	4	54157	2	53714	-2	mono-exon	FALSE	NA	NA	NA	NA	NA	NA	NA	NA	NA	NA	NA	NA	B	non_coding	NA	NA	NA	NA	NA	NA	NA	20	AAGGAGGCTCTTTCATTTCT	NA	NA	NA	NA	AATAAA	-17_x000D_
PB.4792.1	LUXX01004933.1	+	3653	18	novel_in_catalog	ENSSSCG00025010287	novel	4120	18	NA	NA	-5	-1	intron_retention	TRUE	canonical	NA	NA	NA	NA	NA	NA	NA	TRUE	NA	NA	NA	C	coding	634	1905	50	1954	105322	138469	FALSE	25	AAATAGTCTTTGGATTTCTG	NA	NA	NA	NA	AATAAA	-15_x000D_
PB.4792.2	LUXX01004933.1	+	3699	18	full-splice_match	ENSSSCG00025010287	ENSSSCT00025013565	4120	18	423	-2	0	-1	multi-exon	FALSE	canonical	NA	NA	NA	NA	NA	NA	NA	TRUE	NA	NA	NA	C	coding	651	1956	45	2000	105322	138469	FALSE	25	AAATAGTCTTTGGATTTCTG	NA	NA	NA	NA	AATAAA	-15_x000D_
PB.4792.3	LUXX01004933.1	+	4625	17	novel_in_catalog	ENSSSCG00025010287	novel	4120	18	NA	NA	25	-1	intron_retention	FALSE	canonical	NA	NA	NA	NA	NA	NA	NA	TRUE	NA	NA	NA	C	coding	420	1263	20	1282	105322	129514	TRUE	25	AAATAGTCTTTGGATTTCTG	NA	NA	NA	NA	AATAAA	-15_x000D_
PB.4793.1	LUXX01004933.1	+	1129	10	full-splice_match	ENSSSCG00025012859	ENSSSCT00025017051	1282	10	152	1	54	-1	multi-exon	FALSE	canonical	NA	NA	NA	NA	NA	NA	NA	TRUE	NA	NA	NA	C	coding	311	936	38	973	141884	156402	FALSE	15	ATTTGTTTAGGCTGACTTTC	NA	NA	NA	NA	AATAAA	-20_x000D_
PB.4793.2	LUXX01004933.1	+	1013	9	novel_in_catalog	ENSSSCG00025012859	novel	1282	10	NA	NA	66	2	intron_retention	FALSE	canonical	NA	NA	NA	NA	NA	NA	NA	TRUE	NA	NA	NA	C	coding	206	621	238	858	148256	156402	FALSE	15	CATTTGTTTAGGCTGACTTT	NA	NA	NA	NA	AATAAA	-19_x000D_
PB.4794.1	LUXX01004933.1	-	3568	1	novel_in_catalog	ENSSSCG00025011423	novel	2561	24	NA	NA	0	-50203	mono-exon	FALSE	NA	NA	NA	NA	NA	NA	NA	NA	NA	NA	NA	NA	A	non_coding	NA	NA	NA	NA	NA	NA	NA	80	AAAAAGCAAAAACAAACAAA	NA	NA	NA	NA	NA	NA_x000D_
PB.4795.1	LUXX01004933.1	+	1903	6	full-splice_match	ENSSSCG00025013177	ENSSSCT00025017464	2218	6	17	298	17	-3	multi-exon	TRUE	canonical	NA	NA	NA	NA	NA	NA	NA	TRUE	NA	NA	NA	A	coding	204	615	147	761	289901	426570	FALSE	30	AGCATTTTTAAAGTTTTTAC	NA	NA	NA	NA	AATAAA	-19_x000D_
PB.4796.1	LUXX01004933.1	-	5621	27	novel_in_catalog	ENSSSCG00025013449	novel	7066	28	NA	NA	0	228	intron_retention	FALSE	canonical	NA	NA	NA	NA	NA	NA	NA	TRUE	NA	NA	NA	A	coding	1733	5202	192	5393	492599	450852	FALSE	65	AAAAAAAAAAAATTCTGGCA	NA	NA	NA	NA	NA	NA_x000D_
PB.4797.1	LUXX01004933.1	+	2519	9	incomplete-splice_match	ENSSSCG00025013862	ENSSSCT00025018516	2804	10	-21	19470	-7	-314	3prime_fragment	FALSE	canonical	NA	NA	NA	NA	NA	NA	NA	TRUE	NA	NA	NA	B	coding	346	1041	101	1141	511202	530442	FALSE	70	AAAAGAACAATAAAATCAAG	NA	NA	NA	NA	NA	NA_x000D_
PB.4797.2	LUXX01004933.1	+	2663	10	incomplete-splice_match	ENSSSCG00025013862	ENSSSCT00025018417	3495	11	6016	314	-1	-314	5prime_fragment	FALSE	canonical	NA	NA	NA	NA	NA	NA	NA	TRUE	NA	NA	NA	B	coding	346	1041	245	1285	511202	530442	FALSE	70	AAAAGAACAATAAAATCAAG	NA	NA	NA	NA	NA	NA_x000D_
PB.4797.3	LUXX01004933.1	+	2789	10	novel_not_in_catalog	ENSSSCG00025013862	novel	3495	11	NA	NA	3	-314	at_least_one_novel_splicesite	FALSE	canonical	NA	NA	NA	NA	NA	NA	NA	TRUE	NA	NA	NA	B	coding	327	984	241	1224	511202	530255	FALSE	70	AAAAGAACAATAAAATCAAG	NA	NA	NA	NA	NA	NA_x000D_
PB.4798.1	LUXX01004933.1	+	4839	32	novel_not_in_catalog	ENSSSCG00025015104	novel	6174	31	NA	NA	0	-1373	at_least_one_novel_splicesite	TRUE	non_canonical	NA	NA	NA	NA	NA	NA	NA	TRUE	NA	NA	NA	C	coding	898	2697	95	2791	744048	871036	TRUE	90	AAAAAAAAAACAAAAACAAA	NA	NA	NA	NA	NA	NA_x000D_
PB.4798.2	LUXX01004933.1	+	4825	32	incomplete-splice_match	ENSSSCG00025015104	ENSSSCT00025020842	6111	33	-35	1373	0	-1373	3prime_fragment	FALSE	canonical	NA	NA	NA	NA	NA	NA	NA	TRUE	NA	NA	NA	C	coding	1542	4629	95	4723	744048	898296	FALSE	90	AAAAAAAAAACAAAAACAAA	NA	NA	NA	NA	NA	NA_x000D_
PB.4798.3	LUXX01004933.1	+	4784	31	full-splice_match	ENSSSCG00025015104	ENSSSCT00025020316	6174	31	11	1379	11	-1373	multi-exon	FALSE	canonical	NA	NA	NA	NA	NA	NA	NA	TRUE	NA	NA	NA	C	coding	1532	4599	84	4682	744048	898296	FALSE	90	AAAAAAAAAACAAAAACAAA	NA	NA	NA	NA	NA	NA_x000D_
PB.4799.1	LUXX01004933.1	+	4239	31	novel_in_catalog	ENSSSCG00025016908	novel	6054	31	NA	NA	4	0	combination_of_known_junctions	FALSE	canonical	NA	NA	NA	NA	NA	NA	NA	TRUE	NA	NA	NA	B	coding	1222	3669	75	3743	1003192	1063721	FALSE	20	ACCTCATCTCAGGTGTCATC	NA	NA	NA	NA	AATAAA	-19_x000D_
PB.4799.2	LUXX01004933.1	+	3986	31	novel_in_catalog	ENSSSCG00025016908	novel	6054	31	NA	NA	-21	-217	combination_of_known_junctions	FALSE	canonical	NA	NA	NA	NA	NA	NA	NA	TRUE	NA	NA	NA	B	coding	1222	3669	44	3712	1003192	1063721	FALSE	15	TGCTGGTGGTGTGAGAATGT	NA	NA	NA	NA	NA	NA_x000D_
PB.549.1	LUXX01005012.1	-	3495	25	novel_in_catalog	ENSSSCG00025005674	novel	5377	25	NA	NA	-11	2	combination_of_known_junctions	FALSE	canonical	NA	NA	NA	NA	NA	NA	NA	TRUE	NA	NA	NA	A	coding	900	2703	131	2833	652232	516754	FALSE	45	ATGTGTGAAATATATTTAAA	NA	NA	NA	NA	AATAAA	-16_x000D_
PB.550.1	LUXX01005012.1	+	2533	24	full-splice_match	ENSSSCG00025005940	ENSSSCT00025007937	2907	24	4	370	0	-360	multi-exon	FALSE	canonical	NA	NA	NA	NA	NA	NA	NA	TRUE	NA	NA	NA	C	coding	736	2211	23	2233	741272	916236	FALSE	20	ACTCTAGAATTGCTGTTGTG	NA	NA	NA	NA	TATAAA	-20_x000D_
PB.550.2	LUXX01005012.1	+	2894	24	full-splice_match	ENSSSCG00025005940	ENSSSCT00025007937	2907	24	7	6	0	-2	multi-exon	FALSE	canonical	NA	NA	NA	NA	NA	NA	NA	TRUE	NA	NA	NA	C	coding	736	2211	20	2230	741272	916236	FALSE	25	TTAAAATGTGTTTCTTATTT	NA	NA	NA	NA	CATAAA	-20_x000D_
PB.550.3	LUXX01005012.1	+	2167	20	novel_not_in_catalog	ENSSSCG00025005940	novel	2907	24	NA	NA	-14906	-496	at_least_one_novel_splicesite	FALSE	canonical	NA	NA	NA	NA	NA	NA	NA	TRUE	NA	NA	NA	C	coding	626	1881	123	2003	854442	916236	FALSE	10	ATTTTTCCTGTTCTGTGGCA	NA	NA	NA	NA	ATTAAA	-16_x000D_
PB.550.4	LUXX01005012.1	+	2694	21	novel_not_in_catalog	ENSSSCG00025005940	novel	2907	24	NA	NA	-14892	0	at_least_one_novel_splicesite	FALSE	canonical	NA	NA	NA	NA	NA	NA	NA	TRUE	NA	NA	NA	C	coding	639	1920	109	2028	854442	916236	FALSE	25	AAAATGTGTTTCTTATTTTT	NA	NA	NA	NA	CATAAA	-22_x000D_
PB.550.5	LUXX01005012.1	+	2332	21	novel_not_in_catalog	ENSSSCG00025005940	novel	2907	24	NA	NA	-14892	-356	at_least_one_novel_splicesite	FALSE	canonical	NA	NA	NA	NA	NA	NA	NA	TRUE	NA	NA	NA	C	coding	639	1920	109	2028	854442	916236	FALSE	30	TAGAATTGCTGTTGTGATAA	NA	NA	NA	NA	TATAAA	-24_x000D_
PB.550.6	LUXX01005012.1	+	1916	20	novel_not_in_catalog	ENSSSCG00025005940	novel	2907	24	NA	NA	-14892	-1014	at_least_one_novel_splicesite	FALSE	canonical	NA	NA	NA	NA	NA	NA	NA	TRUE	NA	NA	NA	C	coding	602	1806	109	1914	854442	915880	FALSE	65	AGAAAGGAAGGAAAAGGAAA	NA	NA	NA	NA	AAGAAA	-20_x000D_
PB.551.1	LUXX01005012.1	-	4157	31	novel_in_catalog	ENSSSCG00025006259	novel	4316	34	NA	NA	14	4	intron_retention	FALSE	canonical	NA	NA	NA	NA	NA	NA	NA	TRUE	NA	NA	NA	B	coding	1165	3498	159	3656	1006276	917615	FALSE	35	TAAAATATTGGTAGCCCGAC	NA	NA	NA	NA	AATAAA	-12_x000D_
PB.551.2	LUXX01005012.1	-	4050	31	novel_in_catalog	ENSSSCG00025006259	novel	4316	34	NA	NA	-16	12	intron_retention	FALSE	canonical	NA	NA	NA	NA	NA	NA	NA	TRUE	NA	NA	NA	B	coding	1165	3498	155	3652	1006276	917615	FALSE	15	ATTCACTGCTGTGGCATTCC	NA	NA	NA	NA	AATAAA	-32_x000D_
PB.551.3	LUXX01005012.1	-	3673	31	novel_in_catalog	ENSSSCG00025006259	novel	4316	34	NA	NA	17	0	intron_retention	FALSE	canonical	NA	NA	NA	NA	NA	NA	NA	TRUE	NA	NA	NA	B	coding	1165	3498	156	3653	1006276	917615	FALSE	40	AAGCACTGTGTATTTAAAAG	NA	NA	NA	NA	AATAAA	-20_x000D_
PB.552.1	LUXX01005012.1	-	1534	5	novel_not_in_catalog	ENSSSCG00025006579	novel	4042	5	NA	NA	-8770	727	intron_retention	FALSE	canonical	NA	NA	NA	NA	NA	NA	NA	TRUE	NA	NA	NA	B	coding	219	660	148	807	1101161	1052778	FALSE	15	AATTTTGCTGCTCTCGAGTG	NA	NA	NA	NA	GATAAA	-20_x000D_
PB.553.1	LUXX01005012.1	-	1414	7	novel_not_in_catalog	ENSSSCG00025006579	novel	2569	7	NA	NA	3	-1	at_least_one_novel_splicesite	FALSE	canonical	NA	NA	NA	NA	NA	NA	NA	TRUE	NA	NA	NA	B	coding	171	516	101	616	1167152	1137110	FALSE	15	AGATCTGTTGTGATGGCCTT	NA	NA	NA	NA	AATAAA	-12_x000D_
PB.554.1	LUXX01005012.1	+	3575	6	novel_in_catalog	ENSSSCG00025006658	novel	3642	7	NA	NA	-20	23	combination_of_known_splicesites	FALSE	canonical	NA	NA	NA	NA	NA	NA	NA	TRUE	NA	NA	NA	B	coding	158	477	90	566	1171651	1193376	FALSE	40	AAATTCTTGTGAAAACCCAT	NA	NA	NA	NA	ATTAAA	-21_x000D_
PB.554.2	LUXX01005012.1	+	892	5	novel_in_catalog	ENSSSCG00025006658	novel	3642	7	NA	NA	-20	-2593	combination_of_known_splicesites	FALSE	canonical	NA	NA	NA	NA	NA	NA	NA	TRUE	NA	NA	NA	B	coding	100	303	197	499	1190442	1193376	FALSE	10	TGTTACTTTTTATTTTTTCT	NA	NA	NA	NA	AATAAA	-16_x000D_
PB.554.3	LUXX01005012.1	+	2167	6	novel_in_catalog	ENSSSCG00025006658	novel	3642	7	NA	NA	-8	-1373	combination_of_known_splicesites	FALSE	canonical	NA	NA	NA	NA	NA	NA	NA	TRUE	NA	NA	NA	B	coding	158	477	78	554	1171651	1193376	FALSE	70	AATAAAATAACAAAAGAGGA	NA	NA	NA	NA	AATAAA	-9_x000D_
PB.554.4	LUXX01005012.1	+	2275	7	novel_not_in_catalog	ENSSSCG00025006658	novel	3642	7	NA	NA	-1	-1373	at_least_one_novel_splicesite	FALSE	canonical	NA	NA	NA	NA	NA	NA	NA	TRUE	NA	NA	NA	B	coding	158	477	186	662	1171651	1193376	FALSE	70	AATAAAATAACAAAAGAGGA	NA	NA	NA	NA	AATAAA	-9_x000D_
PB.554.5	LUXX01005012.1	+	938	6	novel_in_catalog	ENSSSCG00025006658	novel	3642	7	NA	NA	1	-2593	combination_of_known_splicesites	FALSE	canonical	NA	NA	NA	NA	NA	NA	NA	TRUE	NA	NA	NA	B	coding	158	477	69	545	1171651	1193376	FALSE	10	TGTTACTTTTTATTTTTTCT	NA	NA	NA	NA	AATAAA	-16_x000D_
PB.555.1	LUXX01005012.1	-	2124	1	intergenic	novelGene_33	novel	NA	NA	NA	NA	NA	NA	mono-exon	FALSE	NA	NA	NA	NA	NA	NA	NA	NA	NA	NA	NA	NA	A	non_coding	NA	NA	NA	NA	NA	NA	NA	90	AAAAAGCAAAAAAAAAAAAA	NA	NA	NA	NA	NA	NA_x000D_
PB.556.1	LUXX01005012.1	+	1471	10	incomplete-splice_match	ENSSSCG00025006978	ENSSSCT00025009287	2325	11	-142	1273	-142	12	3prime_fragment	TRUE	canonical	NA	NA	NA	NA	NA	NA	NA	TRUE	NA	NA	NA	A	coding	312	939	157	1095	1487071	1506868	FALSE	5	TTCTGTGGTTTAGTTTTGGT	NA	NA	NA	NA	ATTAAA	-24_x000D_
PB.557.1	LUXX01005012.1	-	5754	30	incomplete-splice_match	ENSSSCG00025007223	ENSSSCT00025009605	6996	31	5	1311	4	-133	3prime_fragment	TRUE	canonical	NA	NA	NA	NA	NA	NA	NA	TRUE	NA	NA	NA	B	coding	1664	4995	248	5242	1614885	1514195	FALSE	80	AAAAAAAATAAAATAAAACT	NA	NA	NA	NA	AAAAAG	-4_x000D_
PB.557.2	LUXX01005012.1	-	2500	13	incomplete-splice_match	ENSSSCG00025007223	ENSSSCT00025009750	7049	30	-22	50847	-5	-49690	3prime_fragment	FALSE	canonical	NA	NA	NA	NA	NA	NA	NA	TRUE	NA	NA	NA	B	coding	747	2241	260	2500	1614885	1563240	FALSE	65	AAGAAAGAAAAGGGGAAAAT	NA	NA	NA	NA	AATAAA	-19_x000D_
PB.558.1	LUXX01005012.1	+	1052	3	full-splice_match	ENSSSCG00025007456	ENSSSCT00025009927	2064	3	349	663	349	-663	multi-exon	FALSE	canonical	NA	NA	NA	NA	NA	NA	NA	TRUE	NA	NA	NA	C	coding	186	561	45	605	1709675	1716518	FALSE	50	AAAAAAACCTTGCACCCAAC	NA	NA	NA	NA	AATAAA	-36_x000D_
PB.558.2	LUXX01005012.1	+	1206	3	full-splice_match	ENSSSCG00025007456	ENSSSCT00025009927	2064	3	351	507	351	-507	multi-exon	FALSE	canonical	NA	NA	NA	NA	NA	NA	NA	TRUE	NA	NA	NA	C	coding	186	561	43	603	1709675	1716518	FALSE	20	CCTCATTGTCTATACTCTCA	NA	NA	NA	NA	AATAAA	-17_x000D_
PB.558.3	LUXX01005012.1	+	1688	3	full-splice_match	ENSSSCG00025007456	ENSSSCT00025009927	2064	3	378	-2	378	2	multi-exon	FALSE	canonical	NA	NA	NA	NA	NA	NA	NA	TRUE	NA	NA	NA	C	coding	186	561	16	576	1709675	1716518	FALSE	40	AGTGATACAGTAATAGTTAT	NA	NA	NA	NA	AATAAA	-17_x000D_
PB.559.1	LUXX01005012.1	-	1669	3	full-splice_match	ENSSSCG00025007515	ENSSSCT00025009994	3288	3	-4	1623	-4	-1623	multi-exon	FALSE	canonical	NA	NA	NA	NA	NA	NA	NA	TRUE	NA	NA	NA	A	coding	231	696	43	738	1796051	1780174	FALSE	20	TAGTTTATGGTATTAGTGTT	NA	NA	NA	NA	AATAAA	-18_x000D_
PB.560.1	LUXX01005012.1	-	1566	10	full-splice_match	ENSSSCG00025008125	ENSSSCT00025010968	1848	10	286	-4	-2	2	multi-exon	FALSE	canonical	NA	NA	NA	NA	NA	NA	NA	TRUE	NA	NA	NA	A	coding	293	882	132	1013	1981414	1961361	FALSE	35	AATGTGGATCATTATTAATG	NA	NA	NA	NA	AATAAA	-18_x000D_
PB.561.1	LUXX01005012.1	+	2686	16	novel_in_catalog	ENSSSCG00025007760	novel	4307	24	NA	NA	-32	4	combination_of_known_junctions	FALSE	canonical	NA	NA	NA	NA	NA	NA	NA	TRUE	NA	NA	NA	B	coding	524	1575	183	1757	1992726	2117047	FALSE	5	CTCCTTTGTTTTGTGTATGT	NA	NA	NA	NA	ATTAAA	-16_x000D_
PB.561.2	LUXX01005012.1	+	2470	16	novel_in_catalog	ENSSSCG00025007760	novel	4307	24	NA	NA	-17	-197	combination_of_known_junctions	FALSE	canonical	NA	NA	NA	NA	NA	NA	NA	TRUE	NA	NA	NA	B	coding	524	1575	168	1742	1992726	2117047	FALSE	35	CACAGTTTTCAGATGATAAT	NA	NA	NA	NA	AATAAA	-16_x000D_
PB.561.3	LUXX01005012.1	+	2219	16	novel_in_catalog	ENSSSCG00025007760	novel	4307	24	NA	NA	-5	-436	combination_of_known_junctions	FALSE	canonical	NA	NA	NA	NA	NA	NA	NA	TRUE	NA	NA	NA	B	coding	524	1575	156	1730	1992726	2117047	FALSE	80	AAAAAAAAAAACTTTAAAAA	NA	NA	NA	NA	TTTAAA	-20_x000D_
PB.562.1	LUXX01005012.1	+	2930	12	novel_not_in_catalog	ENSSSCG00025007760	novel	4307	24	NA	NA	31648	2	at_least_one_novel_splicesite	FALSE	canonical	NA	NA	NA	NA	NA	NA	NA	TRUE	NA	NA	NA	B	coding	612	1839	176	2014	2135648	2148849	TRUE	5	AGCCTGTGGCCGTGTCTGTG	NA	NA	NA	NA	TATAAA	-20_x000D_
PB.563.1	LUXX01005012.1	+	2983	5	incomplete-splice_match	ENSSSCG00025008448	ENSSSCT00025011272	2524	6	-20	-344	-11	2	intron_retention	TRUE	canonical	NA	NA	NA	NA	NA	NA	NA	TRUE	NA	NA	NA	B	coding	658	1977	131	2107	2244760	2266775	FALSE	20	ATTTAGGGAGTGCTCTTTCA	NA	NA	NA	NA	AATAAA	-16_x000D_
PB.563.2	LUXX01005012.1	+	2679	5	incomplete-splice_match	ENSSSCG00025008448	ENSSSCT00025011272	2524	6	-17	-43	-8	43	intron_retention	FALSE	canonical	NA	NA	NA	NA	NA	NA	NA	TRUE	NA	NA	NA	B	coding	658	1977	128	2104	2244760	2266775	FALSE	5	AGGTGGTTCCTCTTGGGTGG	NA	NA	NA	NA	AATAAA	-18_x000D_
PB.564.1	LUXX01005012.1	-	707	8	full-splice_match	ENSSSCG00025008505	ENSSSCT00025011335	1470	8	8	755	8	-755	multi-exon	FALSE	canonical	NA	NA	NA	NA	NA	NA	NA	TRUE	NA	NA	NA	A	coding	160	483	52	534	2302828	2287441	FALSE	25	ACTGGTGTGTTAACAGCCAC	NA	NA	NA	NA	AATAAA	-18_x000D_
PB.565.1	LUXX01005012.1	-	648	5	full-splice_match	ENSSSCG00025008620	ENSSSCT00025011497	1710	5	-14	1076	-14	-1076	multi-exon	FALSE	canonical	NA	NA	NA	NA	NA	NA	NA	TRUE	NA	NA	NA	C	coding	146	441	70	510	2317022	2306866	FALSE	40	AATTTTGATTATTTTATAAA	NA	NA	NA	NA	AATAAA	-16_x000D_
PB.565.2	LUXX01005012.1	-	2358	1	genic	ENSSSCG00025008620	novel	NA	NA	NA	NA	-17	-9085	mono-exon	FALSE	NA	NA	NA	NA	NA	NA	NA	NA	NA	NA	NA	NA	C	non_coding	NA	NA	NA	NA	NA	NA	NA	85	AAAAAAAAAAAAACTCAAAA	NA	NA	NA	NA	NA	NA_x000D_
PB.566.1	LUXX01005012.1	-	1269	10	novel_in_catalog	ENSSSCG00025010450	novel	2120	18	NA	NA	3	1	combination_of_known_junctions	TRUE	canonical	NA	NA	NA	NA	NA	NA	NA	TRUE	NA	NA	NA	A	coding	306	921	138	1058	2902352	2874608	TRUE	15	GTTGAGCATATGTGTCTTTC	NA	NA	NA	NA	AATAAA	-14_x000D_
PB.567.1	LUXX01005012.1	+	1721	8	novel_in_catalog	ENSSSCG00025010764	novel	4316	3	NA	NA	0	-2	combination_of_known_junctions	FALSE	canonical	NA	NA	NA	NA	NA	NA	NA	TRUE	NA	NA	NA	A	coding	428	1287	215	1501	2974668	2990953	FALSE	25	TAGGTTCTCCTTGTGAAATA	NA	NA	NA	NA	AATAAA	-16_x000D_
PB.568.1	LUXX01005012.1	-	2382	8	incomplete-splice_match	ENSSSCG00025011068	ENSSSCT00025014604	2793	9	21	1889	-1	909	3prime_fragment	FALSE	canonical	NA	NA	NA	NA	NA	NA	NA	TRUE	NA	NA	NA	B	coding	323	972	17	988	3045121	3021577	FALSE	70	AAACACAAAAACAATACCAA	NA	NA	NA	NA	NA	NA_x000D_
PB.568.2	LUXX01005012.1	-	2212	8	novel_not_in_catalog	ENSSSCG00025011068	novel	5937	9	NA	NA	-9	728	intron_retention	FALSE	canonical	NA	NA	NA	NA	NA	NA	NA	TRUE	NA	NA	NA	B	coding	324	975	25	999	3045121	3021577	FALSE	65	AAAAAAAAAAAAGTCCAGTT	NA	NA	NA	NA	AAAACA	-35_x000D_
PB.568.3	LUXX01005012.1	-	1621	8	incomplete-splice_match	ENSSSCG00025011068	ENSSSCT00025014604	2793	9	-133	2804	-51	-6	3prime_fragment	FALSE	canonical	NA	NA	NA	NA	NA	NA	NA	TRUE	NA	NA	NA	B	coding	323	972	171	1142	3045121	3021577	FALSE	45	AATAATAATGTTCTGAAATT	NA	NA	NA	NA	ATTAAA	-11_x000D_
PB.568.4	LUXX01005012.1	-	1554	9	novel_not_in_catalog	ENSSSCG00025011068	novel	5937	9	NA	NA	2	-6	intron_retention	FALSE	canonical	NA	NA	NA	NA	NA	NA	NA	TRUE	NA	NA	NA	B	coding	335	1008	68	1075	3045121	3021577	FALSE	45	AATAATAATGTTCTGAAATT	NA	NA	NA	NA	ATTAAA	-11_x000D_
PB.568.5	LUXX01005012.1	-	1124	8	incomplete-splice_match	ENSSSCG00025011068	ENSSSCT00025014660	1220	9	53	349	-1	-349	3prime_fragment	FALSE	canonical	NA	NA	NA	NA	NA	NA	NA	TRUE	NA	NA	NA	B	coding	323	972	17	988	3045121	3021577	FALSE	30	AAGACTGTATTTGCTGTAAC	NA	NA	NA	NA	AATAAA	-17_x000D_
PB.569.1	LUXX01005012.1	+	3346	6	incomplete-splice_match	ENSSSCG00025011603	ENSSSCT00025015292	7342	12	-43	9851	-43	-9851	intron_retention	FALSE	canonical	NA	NA	NA	NA	NA	NA	NA	TRUE	NA	NA	NA	B	coding	424	1275	58	1332	3163357	3213687	FALSE	15	GCTGGAGCCTATGCTTATTG	NA	NA	NA	NA	AATAAA	-16_x000D_
PB.569.2	LUXX01005012.1	+	1420	7	incomplete-splice_match	ENSSSCG00025011603	ENSSSCT00025015292	7342	12	-43	9852	-43	-9852	3prime_fragment	FALSE	canonical	NA	NA	NA	NA	NA	NA	NA	TRUE	NA	NA	NA	B	coding	423	1272	58	1329	3163357	3215609	FALSE	15	CGCTGGAGCCTATGCTTATT	NA	NA	NA	NA	AATAAA	-15_x000D_
PB.569.3	LUXX01005012.1	+	1668	7	incomplete-splice_match	ENSSSCG00025011603	ENSSSCT00025015292	7342	12	-40	9601	-40	-9601	3prime_fragment	FALSE	canonical	NA	NA	NA	NA	NA	NA	NA	TRUE	NA	NA	NA	B	coding	423	1272	55	1326	3163357	3215609	FALSE	5	AGTGTCTGCCTCGTGTTGGG	NA	NA	NA	NA	TTTAAA	-16_x000D_
PB.570.1	LUXX01005012.1	+	2138	10	incomplete-splice_match	ENSSSCG00025012866	ENSSSCT00025017048	6339	11	26	4218	26	-4218	3prime_fragment	FALSE	canonical	NA	NA	NA	NA	NA	NA	NA	TRUE	NA	NA	NA	A	coding	388	1167	49	1215	3658718	3692962	FALSE	25	AGTCACTGTCATGAGTTGTA	NA	NA	NA	NA	TATAAA	-24_x000D_
PB.571.1	LUXX01005012.1	-	2509	2	novel_in_catalog	ENSSSCG00025012986	novel	2590	3	NA	NA	-2	2	intron_retention	FALSE	canonical	NA	NA	NA	NA	NA	NA	NA	TRUE	NA	NA	NA	A	coding	472	1419	73	1491	3717868	3716450	FALSE	20	AGCTTTGCGTGTTAATTGGA	NA	NA	NA	NA	AATAAA	-18_x000D_
PB.572.1	LUXX01005012.1	-	4301	9	incomplete-splice_match	ENSSSCG00025013395	ENSSSCT00025017751	3864	16	-11	33491	-9	0	3prime_fragment	FALSE	canonical	NA	NA	NA	NA	NA	NA	NA	TRUE	NA	NA	NA	B	coding	516	1551	105	1655	3827069	3794619	FALSE	25	AAAGTAGCCTTTGTCATTTC	NA	NA	NA	NA	AATAAA	-13_x000D_
PB.572.2	LUXX01005012.1	-	2743	1	novel_in_catalog	ENSSSCG00025013395	novel	3864	16	NA	NA	32447	0	mono-exon	FALSE	NA	NA	NA	NA	NA	NA	NA	NA	NA	NA	NA	NA	B	coding	115	348	3	350	3794713	3794366	NA	25	AAAGTAGCCTTTGTCATTTC	NA	NA	NA	NA	AATAAA	-13_x000D_
PB.573.1	LUXX01005012.1	-	6108	49	novel_not_in_catalog	ENSSSCG00025013743	novel	8630	67	NA	NA	73442	-421	at_least_one_novel_splicesite	TRUE	canonical	NA	NA	NA	NA	NA	NA	NA	TRUE	NA	NA	NA	A	coding	1870	5613	3	5615	4016791	3926987	FALSE	55	TAAAATAGTAGTTAAAGAAT	NA	NA	NA	NA	ATTAAA	-19_x000D_
PB.574.1	LUXX01005012.1	-	1648	6	incomplete-splice_match	ENSSSCG00025001728	ENSSSCT00025002274	3217	7	-107	1717	-104	-29	intron_retention	FALSE	canonical	NA	NA	NA	NA	NA	NA	NA	TRUE	NA	NA	NA	A	coding	312	939	586	1524	5509838	5418122	FALSE	90	AAAAGGAAAAAAAAAAAAAA	NA	NA	NA	NA	NA	NA_x000D_
PB.575.1	LUXX01005012.1	+	2150	9	incomplete-splice_match	ENSSSCG00025001949	ENSSSCT00025002517	2549	11	22	8515	22	-8515	3prime_fragment	FALSE	canonical	NA	NA	NA	NA	NA	NA	NA	TRUE	NA	NA	NA	A	coding	552	1659	57	1715	5557085	5620540	FALSE	80	AAAAAAAAAAAAAAAACCGC	NA	NA	NA	NA	NA	NA_x000D_
PB.6629.1	LUXX01005090.1	-	2501	19	incomplete-splice_match	ENSSSCG00025005092	ENSSSCT00025006874	6307	21	-26	6231	-25	-2983	3prime_fragment	TRUE	canonical	NA	NA	NA	NA	NA	NA	NA	TRUE	NA	NA	NA	A	coding	805	2415	86	2500	328140	302184	FALSE	40	GTAAGTACCTTATTTAATAA	NA	NA	NA	NA	NA	NA_x000D_
PB.5331.1	LUXX01005265.1	+	1485	9	full-splice_match	ENSSSCG00025006693	ENSSSCT00025008880	5585	9	52	4048	51	2	multi-exon	FALSE	canonical	NA	NA	NA	NA	NA	NA	NA	TRUE	NA	NA	NA	A	coding	365	1098	52	1149	64170	97554	FALSE	20	ACGTCCAGTGACTCGTTTAT	NA	NA	NA	NA	AATAAA	-15_x000D_
PB.5332.1	LUXX01005265.1	-	1481	5	novel_in_catalog	ENSSSCG00025006762	novel	1168	6	NA	NA	-270	4	intron_retention	FALSE	canonical	NA	NA	NA	NA	NA	NA	NA	TRUE	NA	NA	NA	A	coding	132	399	161	559	201332	176960	TRUE	45	AAATCGAATGTGAATTTGAA	NA	NA	NA	NA	AATAAA	-44_x000D_
PB.5333.1	LUXX01005265.1	+	1443	5	novel_in_catalog	ENSSSCG00025006892	novel	1093	6	NA	NA	-141	47	intron_retention	FALSE	canonical	NA	NA	NA	NA	NA	NA	NA	TRUE	NA	NA	NA	B	coding	165	498	355	852	554796	567376	FALSE	85	AAAAAAAAAGAATGAAAAAA	NA	NA	NA	NA	NA	NA_x000D_
PB.5333.2	LUXX01005265.1	+	1612	5	novel_in_catalog	ENSSSCG00025006892	novel	1093	6	NA	NA	-135	222	intron_retention	FALSE	canonical	NA	NA	NA	NA	NA	NA	NA	TRUE	NA	NA	NA	B	coding	165	498	349	846	554796	567376	FALSE	70	AAATAATAAAAACTTAAAAG	NA	NA	NA	NA	NA	NA_x000D_
PB.7056.1	LUXX01005342.1	-	2488	12	novel_in_catalog	ENSSSCG00025013479	novel	3319	21	NA	NA	-14	-5	combination_of_known_junctions	FALSE	canonical	NA	NA	NA	NA	NA	NA	NA	TRUE	NA	NA	NA	B	coding	651	1956	156	2111	201584	180038	FALSE	45	AGAACTCATAGCCTAAATGA	NA	NA	NA	NA	AATAAA	-29_x000D_
PB.7057.1	LUXX01005342.1	-	2362	9	incomplete-splice_match	ENSSSCG00025013479	ENSSSCT00025018212	3319	21	21	26438	21	-26438	3prime_fragment	FALSE	canonical	NA	NA	NA	NA	NA	NA	NA	TRUE	NA	NA	NA	B	coding	315	948	157	1104	223173	207352	FALSE	20	AATATGATTCTGTTTCTTTT	NA	NA	NA	NA	AATAAA	-43_x000D_
PB.7057.2	LUXX01005342.1	-	1995	9	incomplete-splice_match	ENSSSCG00025013479	ENSSSCT00025018212	3319	21	16	26810	16	-26810	3prime_fragment	FALSE	canonical	NA	NA	NA	NA	NA	NA	NA	TRUE	NA	NA	NA	B	coding	315	948	162	1109	223173	207352	FALSE	70	AAAGAGAAGAGAAAAGAAAC	NA	NA	NA	NA	NA	NA_x000D_
PB.7058.1	LUXX01005342.1	+	2832	7	incomplete-splice_match	ENSSSCG00025014036	ENSSSCT00025018755	3217	16	-3	10874	-3	-3043	intron_retention	FALSE	canonical	NA	NA	NA	NA	NA	NA	NA	TRUE	NA	NA	NA	A	coding	287	864	226	1089	228418	232876	TRUE	75	AAAAAAGAAGCGAAAAAGAA	NA	NA	NA	NA	TTTAAA	-29_x000D_
PB.7059.1	LUXX01005342.1	+	897	3	full-splice_match	ENSSSCG00025015092	ENSSSCT00025020193	977	3	81	-1	81	1	multi-exon	FALSE	canonical	NA	NA	NA	NA	NA	NA	NA	TRUE	NA	NA	NA	A	non_coding	NA	NA	NA	NA	NA	NA	NA	25	TAAATTGGATGTTTATCTTG	NA	NA	NA	NA	AATAAA	-15_x000D_
PB.7539.1	LUXX01005415.1	+	2797	1	intergenic	novelGene_580	novel	NA	NA	NA	NA	NA	NA	mono-exon	FALSE	NA	NA	NA	NA	NA	NA	NA	NA	NA	NA	NA	NA	A	coding	16	51	443	493	16646	16696	NA	75	AAAGAAAGAAAGAAAGAAAG	NA	NA	NA	NA	NA	NA_x000D_
PB.2844.1	LUXX01005638.1	-	428	3	novel_in_catalog	ENSSSCG00025019381	novel	511	4	NA	NA	18	0	combination_of_known_splicesites	FALSE	canonical	NA	NA	NA	NA	NA	NA	NA	TRUE	NA	NA	NA	A	non_coding	NA	NA	NA	NA	NA	NA	NA	5	ACCCCCGTGTCCTGGCTTCC	NA	NA	NA	NA	AATAAA	-21_x000D_
PB.2845.1	LUXX01005638.1	-	499	3	novel_not_in_catalog	ENSSSCG00025019479	novel	517	3	NA	NA	0	1	at_least_one_novel_splicesite	FALSE	canonical	NA	NA	NA	NA	NA	NA	NA	TRUE	NA	NA	NA	A	coding	101	306	70	375	71979	70164	FALSE	30	TAAGACTGATGGTCTGAGAG	NA	NA	NA	NA	AATAAA	-15_x000D_
PB.2846.1	LUXX01005638.1	-	1068	3	novel_in_catalog	ENSSSCG00025019605	novel	663	4	NA	NA	-3	196	intron_retention	FALSE	canonical	NA	NA	NA	NA	NA	NA	NA	TRUE	NA	NA	NA	A	coding	103	312	143	454	125100	124525	FALSE	15	ACCTTCTCATGCCTTGGTGA	NA	NA	NA	NA	ATTAAA	-19_x000D_
PB.2847.1	LUXX01005638.1	+	550	3	novel_in_catalog	ENSSSCG00025019764	novel	708	4	NA	NA	-17	0	combination_of_known_splicesites	FALSE	canonical	NA	NA	NA	NA	NA	NA	NA	TRUE	NA	NA	NA	A	coding	94	285	83	367	151605	153392	FALSE	15	AGCCACCAGCTGCTGTCTCT	NA	NA	NA	NA	ATTAAA	-16_x000D_
PB.2848.1	LUXX01005638.1	+	3869	6	full-splice_match	ENSSSCG00025019897	ENSSSCT00025027099	2092	6	-10	-1767	-9	1767	multi-exon	FALSE	canonical	NA	NA	NA	NA	NA	NA	NA	TRUE	NA	NA	NA	C	coding	249	750	299	1048	156487	163521	FALSE	15	AGCTTAAGCCCCCTTCTCTT	NA	NA	NA	NA	AATAAA	-25_x000D_
PB.2848.2	LUXX01005638.1	+	2563	5	novel_in_catalog	ENSSSCG00025019897	novel	2092	6	NA	NA	-9	289	intron_retention	TRUE	canonical	NA	NA	NA	NA	NA	NA	NA	TRUE	NA	NA	NA	C	coding	224	675	1690	2364	157878	163521	FALSE	5	GACTTGGGTTTTGTTTTGTT	NA	NA	NA	NA	NA	NA_x000D_
PB.2848.3	LUXX01005638.1	+	2093	6	full-splice_match	ENSSSCG00025019897	ENSSSCT00025027099	2092	6	-1	0	0	0	multi-exon	FALSE	canonical	NA	NA	NA	NA	NA	NA	NA	TRUE	NA	NA	NA	C	coding	249	750	290	1039	156487	163521	FALSE	25	AGCCAGGACTTACTCTTTAT	NA	NA	NA	NA	AAGAAA	-18_x000D_
PB.2848.4	LUXX01005638.1	+	3719	5	novel_in_catalog	ENSSSCG00025019897	novel	2092	6	NA	NA	4	290	intron_retention	FALSE	canonical	NA	NA	NA	NA	NA	NA	NA	TRUE	NA	NA	NA	C	coding	118	357	3163	3519	160681	163521	FALSE	5	ACTTGGGTTTTGTTTTGTTG	NA	NA	NA	NA	NA	NA_x000D_
PB.2848.5	LUXX01005638.1	+	3398	5	novel_in_catalog	ENSSSCG00025019897	novel	2092	6	NA	NA	4	-4	intron_retention	FALSE	canonical	NA	NA	NA	NA	NA	NA	NA	TRUE	NA	NA	NA	C	coding	224	675	1676	2350	157878	163521	FALSE	35	AAATCCAGCCAGGACTTACT	NA	NA	NA	NA	AAGAAA	-12_x000D_
PB.2848.6	LUXX01005638.1	+	5022	4	novel_in_catalog	ENSSSCG00025019897	novel	2092	6	NA	NA	5	289	intron_retention	FALSE	canonical	NA	NA	NA	NA	NA	NA	NA	TRUE	NA	NA	NA	C	coding	118	357	4467	4823	160681	163521	FALSE	5	GACTTGGGTTTTGTTTTGTT	NA	NA	NA	NA	NA	NA_x000D_
PB.2849.1	LUXX01005638.1	-	1763	14	incomplete-splice_match	ENSSSCG00025020104	ENSSSCT00025027400	1221	15	24	15819	7	167	3prime_fragment	FALSE	canonical	NA	NA	NA	NA	NA	NA	NA	TRUE	NA	NA	NA	B	coding	390	1173	67	1239	179618	173607	FALSE	30	GGAACACTGTTTAAGCATTT	NA	NA	NA	NA	ATTAAA	-42_x000D_
PB.2849.2	LUXX01005638.1	-	1588	14	incomplete-splice_match	ENSSSCG00025020104	ENSSSCT00025027400	1221	15	28	15990	11	-4	3prime_fragment	FALSE	canonical	NA	NA	NA	NA	NA	NA	NA	TRUE	NA	NA	NA	B	coding	390	1173	63	1235	179618	173607	FALSE	5	AGGGCTCTTGGTCTTGTTTT	NA	NA	NA	NA	ATTAAA	-14_x000D_
PB.2850.1	LUXX01005638.1	+	4444	30	incomplete-splice_match	ENSSSCG00025020757	ENSSSCT00025028419	5590	39	-8	5966	-8	-682	3prime_fragment	TRUE	canonical	NA	NA	NA	NA	NA	NA	NA	TRUE	NA	NA	NA	A	coding	1040	3123	577	3699	217059	255748	FALSE	5	TTCGTGCCGGAGTTGCTGCC	NA	NA	NA	NA	AATAAA	-17_x000D_
PB.2851.1	LUXX01005638.1	-	2099	11	novel_in_catalog	ENSSSCG00025021229	novel	3928	10	NA	NA	-57	-1732	combination_of_known_junctions	FALSE	canonical	NA	NA	NA	NA	NA	NA	NA	TRUE	NA	NA	NA	A	coding	592	1779	211	1989	315026	300747	FALSE	75	AAAACAAAACAGAAAAACAG	NA	NA	NA	NA	NA	NA_x000D_
PB.2852.1	LUXX01005638.1	-	2015	4	novel_in_catalog	ENSSSCG00025021698	novel	2300	5	NA	NA	21	35	intron_retention	FALSE	canonical	NA	NA	NA	NA	NA	NA	NA	TRUE	NA	NA	NA	A	coding	324	975	82	1056	431422	428938	FALSE	25	ACATGTGTACAGTGTCTGAC	NA	NA	NA	NA	AATAAA	-13_x000D_
PB.2853.1	LUXX01005638.1	-	925	5	incomplete-splice_match	ENSSSCG00025022097	ENSSSCT00025030101	742	6	-101	-1	-101	-1	intron_retention	FALSE	canonical	NA	NA	NA	NA	NA	NA	NA	TRUE	NA	NA	NA	A	coding	146	441	325	765	447687	445755	FALSE	25	ATTTCCTTTCCCAATTCTAA	NA	NA	NA	NA	AATAAA	-13_x000D_
PB.2854.1	LUXX01005638.1	-	1170	8	incomplete-splice_match	ENSSSCG00025022171	ENSSSCT00025030166	2788	9	-71	1808	-71	-1808	3prime_fragment	TRUE	canonical	NA	NA	NA	NA	NA	NA	NA	TRUE	NA	NA	NA	B	coding	203	612	82	693	456444	452292	FALSE	20	AAATGTCCCTGGTTTGGGTA	NA	NA	NA	NA	ATTAAA	-16_x000D_
PB.2854.2	LUXX01005638.1	-	898	8	incomplete-splice_match	ENSSSCG00025022171	ENSSSCT00025030166	2788	9	-67	2076	-67	-2076	3prime_fragment	FALSE	canonical	NA	NA	NA	NA	NA	NA	NA	TRUE	NA	NA	NA	B	coding	203	612	78	689	456444	452292	FALSE	55	AAGAAGGAGAAGAATTGAGA	NA	NA	NA	NA	AAAAAG	-36_x000D_
PB.2855.1	LUXX01005638.1	+	2398	4	novel_not_in_catalog	ENSSSCG00025022237	novel	851	5	NA	NA	0	137	intron_retention	FALSE	canonical	NA	NA	NA	NA	NA	NA	NA	TRUE	NA	NA	NA	B	non_coding	NA	NA	NA	NA	NA	NA	NA	20	ATACCTGGCACTTCTGGTTA	NA	NA	NA	NA	AATAAA	-25_x000D_
PB.2855.2	LUXX01005638.1	+	344	4	novel_not_in_catalog	ENSSSCG00025022237	novel	851	5	NA	NA	0	-1917	at_least_one_novel_splicesite	TRUE	canonical	NA	NA	NA	NA	NA	NA	NA	TRUE	NA	NA	NA	B	non_coding	NA	NA	NA	NA	NA	NA	NA	10	ATCCTGTTTATTGTCTTGTT	NA	NA	NA	NA	AATAAA	-15_x000D_
PB.2856.1	LUXX01005638.1	-	2687	7	novel_in_catalog	ENSSSCG00025023154	novel	2748	8	NA	NA	-6	2	intron_retention	FALSE	canonical	NA	NA	NA	NA	NA	NA	NA	TRUE	NA	NA	NA	B	coding	152	459	29	487	611847	603422	TRUE	30	AACCCTCAGAACTACTTGCT	NA	NA	NA	NA	AATAAA	-15_x000D_
PB.2856.2	LUXX01005638.1	-	2079	8	novel_in_catalog	ENSSSCG00025023154	novel	2748	8	NA	NA	25	2	intron_retention	FALSE	canonical	NA	NA	NA	NA	NA	NA	NA	TRUE	NA	NA	NA	B	coding	248	747	69	815	611847	590003	FALSE	30	AACCCTCAGAACTACTTGCT	NA	NA	NA	NA	AATAAA	-15_x000D_
PB.2856.4	LUXX01005638.1	-	1592	8	novel_in_catalog	ENSSSCG00025023154	novel	2748	8	NA	NA	25	193	combination_of_known_junctions	FALSE	canonical	NA	NA	NA	NA	NA	NA	NA	TRUE	NA	NA	NA	B	coding	248	747	69	815	611847	590003	FALSE	55	AAAGAAAGAAAATTATGTTT	NA	NA	NA	NA	NA	NA_x000D_
PB.2856.5	LUXX01005638.1	-	1380	8	novel_in_catalog	ENSSSCG00025023154	novel	2748	8	NA	NA	25	0	combination_of_known_junctions	FALSE	canonical	NA	NA	NA	NA	NA	NA	NA	TRUE	NA	NA	NA	B	coding	248	747	69	815	611847	590003	FALSE	95	AAAAAAAAAAAAAAAAAAAG	NA	NA	NA	NA	AAAAAG	-39_x000D_
PB.2856.6	LUXX01005638.1	-	1461	9	novel_in_catalog	ENSSSCG00025023154	novel	2748	8	NA	NA	23	0	combination_of_known_splicesites	FALSE	canonical	NA	NA	NA	NA	NA	NA	NA	TRUE	NA	NA	NA	B	coding	248	747	71	817	611847	590082	FALSE	95	AAAAAAAAAAAAAAAAAAAG	NA	NA	NA	NA	AAAAAG	-39_x000D_
PB.2856.7	LUXX01005638.1	-	1148	8	novel_in_catalog	ENSSSCG00025023154	novel	2748	8	NA	NA	22	-235	combination_of_known_junctions	FALSE	canonical	NA	NA	NA	NA	NA	NA	NA	TRUE	NA	NA	NA	B	coding	248	747	72	818	611847	590003	FALSE	50	AAAAAACATTCCAGGTAATT	NA	NA	NA	NA	NA	NA_x000D_
PB.2857.1	LUXX01005638.1	-	1651	7	full-splice_match	ENSSSCG00025023648	ENSSSCT00025032053	1768	7	110	7	65	-7	multi-exon	FALSE	canonical	NA	NA	NA	NA	NA	NA	NA	TRUE	NA	NA	NA	C	coding	253	762	161	922	641510	631648	FALSE	55	TAAAAAATAAAGCATGCGAT	NA	NA	NA	NA	AATAAA	-10_x000D_
PB.2857.2	LUXX01005638.1	-	1315	7	full-splice_match	ENSSSCG00025023648	ENSSSCT00025032053	1768	7	60	393	15	9	multi-exon	FALSE	canonical	NA	NA	NA	NA	NA	NA	NA	TRUE	NA	NA	NA	C	coding	253	762	211	972	641510	631648	FALSE	5	GTGATGGGGCTTGGTGTCTT	NA	NA	NA	NA	AATAAA	-21_x000D_
PB.2858.1	LUXX01005638.1	+	4000	28	novel_not_in_catalog	ENSSSCG00025024538	novel	4335	29	NA	NA	-187	7	at_least_one_novel_splicesite	TRUE	canonical	NA	NA	NA	NA	NA	NA	NA	TRUE	NA	NA	NA	B	coding	1106	3321	134	3454	646241	690141	FALSE	10	AGCCTCTGCCCATTCTTGCT	NA	NA	NA	NA	TATAAA	-19_x000D_
PB.2858.10	LUXX01005638.1	+	1867	1	novel_in_catalog	ENSSSCG00025024538	novel	4335	29	NA	NA	-3	-46664	mono-exon	FALSE	NA	NA	NA	NA	NA	NA	NA	NA	NA	NA	NA	NA	B	non_coding	NA	NA	NA	NA	NA	NA	NA	75	AAAAAAAAAAAAATGGTCAA	NA	NA	NA	NA	NA	NA_x000D_
PB.2858.11	LUXX01005638.1	+	3387	25	novel_in_catalog	ENSSSCG00025024538	novel	4310	29	NA	NA	0	-5942	combination_of_known_junctions	FALSE	canonical	NA	NA	NA	NA	NA	NA	NA	TRUE	NA	NA	NA	B	coding	992	2979	62	3040	646241	684296	FALSE	10	TAACTCTGGCGTTCTTTCCG	NA	NA	NA	NA	AATAAA	-19_x000D_
PB.2858.12	LUXX01005638.1	+	3961	28	novel_in_catalog	ENSSSCG00025024538	novel	4310	29	NA	NA	-5	6	combination_of_known_junctions	FALSE	canonical	NA	NA	NA	NA	NA	NA	NA	TRUE	NA	NA	NA	B	coding	1103	3312	105	3416	646241	690141	FALSE	10	CAGCCTCTGCCCATTCTTGC	NA	NA	NA	NA	TATAAA	-18_x000D_
PB.2858.13	LUXX01005638.1	+	3997	28	novel_in_catalog	ENSSSCG00025024538	novel	3708	29	NA	NA	-1	7	combination_of_known_junctions	FALSE	canonical	NA	NA	NA	NA	NA	NA	NA	TRUE	NA	NA	NA	B	coding	1116	3351	101	3451	646241	690141	FALSE	10	AGCCTCTGCCCATTCTTGCT	NA	NA	NA	NA	TATAAA	-19_x000D_
PB.2858.14	LUXX01005638.1	+	3341	24	incomplete-splice_match	ENSSSCG00025024538	ENSSSCT00025034219	4310	29	4138	6037	4111	-5942	internal_fragment	FALSE	canonical	NA	NA	NA	NA	NA	NA	NA	TRUE	NA	NA	NA	B	coding	982	2949	46	2994	646241	684296	FALSE	10	TAACTCTGGCGTTCTTTCCG	NA	NA	NA	NA	AATAAA	-19_x000D_
PB.2858.2	LUXX01005638.1	+	4051	27	novel_in_catalog	ENSSSCG00025024538	novel	4335	29	NA	NA	-28	147	combination_of_known_junctions	FALSE	canonical	NA	NA	NA	NA	NA	NA	NA	TRUE	NA	NA	NA	B	coding	1086	3261	105	3365	646241	690141	FALSE	35	AAGAACTCCGACCTTAATGT	NA	NA	NA	NA	AATAAA	-19_x000D_
PB.2858.3	LUXX01005638.1	+	3349	25	novel_not_in_catalog	ENSSSCG00025024538	novel	4310	29	NA	NA	2	-5942	at_least_one_novel_splicesite	FALSE	canonical	NA	NA	NA	NA	NA	NA	NA	TRUE	NA	NA	NA	B	coding	975	2928	75	3002	646241	684296	FALSE	10	TAACTCTGGCGTTCTTTCCG	NA	NA	NA	NA	AATAAA	-19_x000D_
PB.2858.4	LUXX01005638.1	+	3427	26	novel_in_catalog	ENSSSCG00025024538	novel	4335	29	NA	NA	5	-5942	combination_of_known_junctions	FALSE	canonical	NA	NA	NA	NA	NA	NA	NA	TRUE	NA	NA	NA	B	coding	1002	3009	72	3080	646241	684296	FALSE	10	TAACTCTGGCGTTCTTTCCG	NA	NA	NA	NA	AATAAA	-19_x000D_
PB.2858.5	LUXX01005638.1	+	3906	27	novel_in_catalog	ENSSSCG00025024538	novel	4335	29	NA	NA	7	7	combination_of_known_junctions	FALSE	canonical	NA	NA	NA	NA	NA	NA	NA	TRUE	NA	NA	NA	B	coding	1096	3291	70	3360	646241	690141	FALSE	10	AGCCTCTGCCCATTCTTGCT	NA	NA	NA	NA	TATAAA	-19_x000D_
PB.2858.6	LUXX01005638.1	+	3865	27	novel_in_catalog	ENSSSCG00025024538	novel	4335	29	NA	NA	-3	1	combination_of_known_junctions	FALSE	canonical	NA	NA	NA	NA	NA	NA	NA	TRUE	NA	NA	NA	B	coding	1086	3261	65	3325	646241	690141	FALSE	15	ACCTTCAGCCTCTGCCCATT	NA	NA	NA	NA	TATAAA	-13_x000D_
PB.2858.7	LUXX01005638.1	+	3909	27	novel_not_in_catalog	ENSSSCG00025024538	novel	4023	28	NA	NA	-3	1	at_least_one_novel_splicesite	FALSE	canonical	NA	NA	NA	NA	NA	NA	NA	TRUE	NA	NA	NA	B	coding	1079	3240	130	3369	646241	690141	FALSE	15	ACCTTCAGCCTCTGCCCATT	NA	NA	NA	NA	TATAAA	-13_x000D_
PB.2858.8	LUXX01005638.1	+	3690	27	novel_in_catalog	ENSSSCG00025024538	novel	4335	29	NA	NA	-3	-79	combination_of_known_junctions	FALSE	canonical	NA	NA	NA	NA	NA	NA	NA	TRUE	NA	NA	NA	B	coding	1086	3261	65	3325	646241	690141	FALSE	15	CCTAAGTCTCCTCCTTTATT	NA	NA	NA	NA	AATATA	-16_x000D_
PB.2858.9	LUXX01005638.1	+	3452	26	novel_in_catalog	ENSSSCG00025024538	novel	4335	29	NA	NA	-3	-5940	combination_of_known_junctions	FALSE	canonical	NA	NA	NA	NA	NA	NA	NA	TRUE	NA	NA	NA	B	coding	1012	3039	65	3103	646241	684296	FALSE	5	ACTCTGGCGTTCTTTCCGTG	NA	NA	NA	NA	AATAAA	-21_x000D_
PB.2859.1	LUXX01005638.1	+	1100	7	novel_in_catalog	ENSSSCG00025026503	novel	1130	8	NA	NA	12	-3	combination_of_known_junctions	FALSE	canonical	NA	NA	NA	NA	NA	NA	NA	TRUE	NA	NA	NA	A	coding	250	753	176	928	692565	694347	FALSE	15	TAATCCCTTGGCACTGGTTT	NA	NA	NA	NA	AATAAA	-15_x000D_
PB.2860.1	LUXX01005638.1	-	6140	15	novel_not_in_catalog	ENSSSCG00025028491	novel	6304	15	NA	NA	-18486	-30	intron_retention	FALSE	canonical	NA	NA	NA	NA	NA	NA	NA	TRUE	NA	NA	NA	A	coding	905	2718	811	3528	984120	968888	FALSE	90	AAATAAAAAAAAAAGAAAAA	NA	NA	NA	NA	AATATA	-11_x000D_
PB.2861.1	LUXX01005638.1	-	1055	5	incomplete-splice_match	ENSSSCG00025029408	ENSSSCT00025039977	4854	6	-24	5710	-24	-5710	3prime_fragment	FALSE	canonical	NA	NA	NA	NA	NA	NA	NA	TRUE	NA	NA	NA	A	coding	192	579	77	655	1303526	1292458	FALSE	15	TCAGAGCTGGCCGTCTCTCA	NA	NA	NA	NA	AATAAA	-19_x000D_
PB.2862.1	LUXX01005638.1	-	3181	11	novel_in_catalog	ENSSSCG00025029546	novel	3623	10	NA	NA	-36	-18	combination_of_known_junctions	FALSE	canonical	NA	NA	NA	NA	NA	NA	NA	TRUE	NA	NA	NA	B	coding	732	2199	99	2297	1325409	1318528	FALSE	75	AAATAAAACAACATAAACAA	NA	NA	NA	NA	AAAAAG	-28_x000D_
PB.2862.2	LUXX01005638.1	-	2855	11	novel_in_catalog	ENSSSCG00025029546	novel	3623	10	NA	NA	-39	-1	combination_of_known_junctions	FALSE	canonical	NA	NA	NA	NA	NA	NA	NA	TRUE	NA	NA	NA	B	coding	732	2199	102	2300	1325409	1318528	FALSE	10	ACACTGTGTGTGGGCGCCGT	NA	NA	NA	NA	AGTAAA	-18_x000D_
PB.2863.1	LUXX01005638.1	-	3148	3	incomplete-splice_match	ENSSSCG00025029546	ENSSSCT00025040438	4992	12	5	10754	5	-10754	3prime_fragment	FALSE	canonical	NA	NA	NA	NA	NA	NA	NA	TRUE	NA	NA	NA	B	coding	406	1221	200	1420	1332799	1330454	FALSE	15	AGACTGGAGCCCTTGCTGTT	NA	NA	NA	NA	AATAAA	-18_x000D_
PB.2864.1	LUXX01005638.1	-	3196	14	full-splice_match	ENSSSCG00025029885	ENSSSCT00025040749	3188	14	-7	-1	-7	0	multi-exon	TRUE	canonical	NA	NA	NA	NA	NA	NA	NA	TRUE	NA	NA	NA	C	coding	474	1425	229	1653	1341746	1335052	FALSE	5	ATCTCGGCCTCTTGGTCTCT	NA	NA	NA	NA	ATTAAA	-16_x000D_
PB.2864.3	LUXX01005638.1	-	3099	13	novel_in_catalog	ENSSSCG00025029885	novel	3188	14	NA	NA	12	0	combination_of_known_splicesites	FALSE	canonical	NA	NA	NA	NA	NA	NA	NA	TRUE	NA	NA	NA	C	coding	474	1425	133	1557	1341746	1335052	FALSE	5	TATCTCGGCCTCTTGGTCTC	NA	NA	NA	NA	ATTAAA	-15_x000D_
PB.2865.1	LUXX01005638.1	+	743	3	novel_not_in_catalog	ENSSSCG00025030354	novel	1495	7	NA	NA	-220	-5	at_least_one_novel_splicesite	FALSE	canonical	NA	NA	NA	NA	NA	NA	NA	TRUE	NA	NA	NA	A	non_coding	NA	NA	NA	NA	NA	NA	NA	40	AATCTAATTGTCTAATTATA	NA	NA	NA	NA	ATTAAA	-15_x000D_
PB.2866.1	LUXX01005638.1	+	2807	21	novel_in_catalog	ENSSSCG00025031946	novel	3034	23	NA	NA	-2	1	combination_of_known_splicesites	FALSE	canonical	NA	NA	NA	NA	NA	NA	NA	TRUE	NA	NA	NA	A	coding	817	2454	77	2530	1417630	1428673	FALSE	15	AGCGCGCCTTGAAGTTTGTC	NA	NA	NA	NA	AATAAA	-15_x000D_
PB.2867.1	LUXX01005638.1	+	1255	4	novel_not_in_catalog	ENSSSCG00025033140	novel	1257	4	NA	NA	-1	0	at_least_one_novel_splicesite	FALSE	canonical	NA	NA	NA	NA	NA	NA	NA	TRUE	NA	NA	NA	A	coding	203	612	77	688	1430111	1434237	FALSE	15	AACCTACTGCCCTCTGGCTC	NA	NA	NA	NA	AATAAA	-27_x000D_
PB.2868.1	LUXX01005638.1	-	622	6	full-splice_match	ENSSSCG00025034136	ENSSSCT00025046615	629	6	12	-5	12	-3	multi-exon	FALSE	canonical	NA	NA	NA	NA	NA	NA	NA	TRUE	NA	NA	NA	A	coding	136	411	176	586	1520946	1517920	FALSE	15	TGTGAGCTGTGATATGCTGT	NA	NA	NA	NA	AATAAA	-19_x000D_
PB.2869.1	LUXX01005638.1	+	3075	10	novel_in_catalog	ENSSSCG00025033686	novel	3193	10	NA	NA	-13	0	combination_of_known_junctions	TRUE	canonical	NA	NA	NA	NA	NA	NA	NA	TRUE	NA	NA	NA	A	coding	759	2280	65	2344	1521699	1531521	FALSE	5	TTCCTGTGATGTCTTCCTTT	NA	NA	NA	NA	AATAAA	-16_x000D_
PB.2870.1	LUXX01005638.1	-	3141	23	incomplete-splice_match	ENSSSCG00025036262	ENSSSCT00025049460	4017	24	1151	-1	-4	1	5prime_fragment	FALSE	canonical	NA	NA	NA	NA	NA	NA	NA	TRUE	NA	NA	NA	A	coding	956	2871	24	2894	1551781	1540889	FALSE	30	AAGCCAGTGCAATTACTTGT	NA	NA	NA	NA	TATAAA	-17_x000D_
PB.2871.1	LUXX01005638.1	+	1101	8	incomplete-splice_match	ENSSSCG00025036693	ENSSSCT00025050083	1523	10	422	2	422	-2	5prime_fragment	FALSE	canonical	NA	NA	NA	NA	NA	NA	NA	TRUE	NA	NA	NA	A	coding	317	954	19	972	1553122	1557848	FALSE	30	AACATTCTCTCCTTCAAGAG	NA	NA	NA	NA	AATAAA	-24_x000D_
PB.2872.1	LUXX01005638.1	-	2473	12	incomplete-splice_match	ENSSSCG00025036920	ENSSSCT00025050290	5299	14	-90	3060	-90	-3060	3prime_fragment	FALSE	canonical	NA	NA	NA	NA	NA	NA	NA	TRUE	NA	NA	NA	B	coding	536	1611	194	1804	1564113	1558528	FALSE	25	AGCATATACGTCATTCTTCT	NA	NA	NA	NA	AGTAAA	-16_x000D_
PB.2872.3	LUXX01005638.1	-	1872	12	incomplete-splice_match	ENSSSCG00025036920	ENSSSCT00025050290	5299	14	-95	3666	-95	-3666	3prime_fragment	FALSE	canonical	NA	NA	NA	NA	NA	NA	NA	TRUE	NA	NA	NA	B	coding	536	1611	199	1809	1564113	1558528	FALSE	15	ACATGCTGTCTGTGGCTGTA	NA	NA	NA	NA	ATTAAA	-17_x000D_
PB.2873.1	LUXX01005638.1	-	1435	9	full-splice_match	ENSSSCG00025038053	ENSSSCT00025051783	1574	9	136	3	-81	-3	multi-exon	FALSE	canonical	NA	NA	NA	NA	NA	NA	NA	TRUE	NA	NA	NA	A	coding	347	1044	82	1125	1593435	1589263	FALSE	25	AAATCCCTGTTTCTGGAATT	NA	NA	NA	NA	AATAAA	-22_x000D_
PB.2874.1	LUXX01005638.1	+	1163	10	incomplete-splice_match	ENSSSCG00025039430	ENSSSCT00025053658	4888	20	0	10923	0	-5180	3prime_fragment	FALSE	canonical	NA	NA	NA	NA	NA	NA	NA	TRUE	NA	NA	NA	A	coding	353	1062	48	1109	1650977	1664085	FALSE	0	GGTTCCGTTCCTGTTTTTTT	NA	NA	NA	NA	AATAAA	-17_x000D_
PB.2875.1	LUXX01005638.1	+	1941	9	novel_not_in_catalog	ENSSSCG00025038906	novel	6205	19	NA	NA	16201	10	at_least_one_novel_splicesite	FALSE	canonical	NA	NA	NA	NA	NA	NA	NA	TRUE	NA	NA	NA	A	coding	433	1302	87	1388	1668386	1674512	FALSE	5	GTGTGTCTGTCACTGTTGGT	NA	NA	NA	NA	AATAAA	-14_x000D_
PB.2876.1	LUXX01005638.1	-	2268	3	novel_in_catalog	ENSSSCG00025040296	novel	10871	28	NA	NA	3	25118	combination_of_known_splicesites	FALSE	canonical	NA	NA	NA	NA	NA	NA	NA	TRUE	NA	NA	NA	B	coding	702	2106	161	2266	1839472	1813715	FALSE	80	AAAAAAAAGAAAAGGAAGAA	NA	NA	NA	NA	NA	NA_x000D_
PB.2876.2	LUXX01005638.1	-	2476	3	incomplete-splice_match	ENSSSCG00025040296	ENSSSCT00025055598	10871	28	394	133952	394	25115	internal_fragment	FALSE	canonical	NA	NA	NA	NA	NA	NA	NA	TRUE	NA	NA	NA	B	coding	701	2103	372	2474	1839472	1813718	FALSE	75	ATTAAAAAAAAGAAAAGGAA	NA	NA	NA	NA	NA	NA_x000D_
PB.2877.1	LUXX01005638.1	-	1662	1	intergenic	novelGene_232	novel	NA	NA	NA	NA	NA	NA	mono-exon	FALSE	NA	NA	NA	NA	NA	NA	NA	NA	NA	NA	NA	NA	A	non_coding	NA	NA	NA	NA	NA	NA	NA	95	AAAAAAAAAAAAAAAAAAAG	NA	NA	NA	NA	AATGAA	-19_x000D_
PB.2878.1	LUXX01005638.1	+	1645	13	novel_not_in_catalog	ENSSSCG00025000396	novel	1631	13	NA	NA	-4	-8	at_least_one_novel_splicesite	TRUE	non_canonical	NA	NA	NA	NA	NA	NA	NA	TRUE	NA	NA	NA	A	coding	428	1287	58	1344	1913015	1917041	FALSE	75	AAAAAAAACAAAAGGTAGAA	NA	NA	NA	NA	AATAAA	-17_x000D_
PB.2878.2	LUXX01005638.1	+	1893	14	incomplete-splice_match	ENSSSCG00025000808	ENSSSCT00025001091	4809	27	21950	-5	21950	5	5prime_fragment	FALSE	canonical	NA	NA	NA	NA	NA	NA	NA	TRUE	NA	NA	NA	A	coding	571	1716	41	1756	1913015	1917205	FALSE	75	AAAAAAAACAAAAGGTAGAA	NA	NA	NA	NA	AATAAA	-17_x000D_
PB.2879.1	LUXX01005638.1	+	3503	4	full-splice_match	ENSSSCG00025001096	ENSSSCT00025001338	4687	4	24	1160	24	-1160	multi-exon	FALSE	canonical	NA	NA	NA	NA	NA	NA	NA	TRUE	NA	NA	NA	C	coding	431	1296	243	1538	2002530	2022824	FALSE	65	AAAAAAAAAAAATACTTCTT	NA	NA	NA	NA	NA	NA_x000D_
PB.2879.2	LUXX01005638.1	+	4651	4	full-splice_match	ENSSSCG00025001096	ENSSSCT00025001338	4687	4	36	0	36	0	multi-exon	FALSE	canonical	NA	NA	NA	NA	NA	NA	NA	TRUE	NA	NA	NA	C	coding	431	1296	231	1526	2002530	2022824	FALSE	20	TACCCGGTGACATCAGCCTG	NA	NA	NA	NA	AATAAA	-20_x000D_
PB.2880.1	LUXX01005638.1	-	3884	6	novel_not_in_catalog	ENSSSCG00025001209	novel	6855	19	NA	NA	-614	4	intron_retention	FALSE	canonical	NA	NA	NA	NA	NA	NA	NA	TRUE	NA	NA	NA	B	coding	218	657	181	837	2046968	2040472	FALSE	10	TTGGGCCTTTCCTTTACTTA	NA	NA	NA	NA	AATACA	-19_x000D_
PB.2880.2	LUXX01005638.1	-	2529	7	novel_not_in_catalog	ENSSSCG00025001209	novel	6855	19	NA	NA	-582	-6	at_least_one_novel_splicesite	FALSE	non_canonical	NA	NA	NA	NA	NA	NA	NA	TRUE	NA	NA	NA	B	coding	218	657	149	805	2046968	2040472	TRUE	30	AAACAACTTATTGGGCCTTT	NA	NA	NA	NA	AATACA	-9_x000D_
PB.2880.3	LUXX01005638.1	-	3378	6	novel_not_in_catalog	ENSSSCG00025001209	novel	6855	19	NA	NA	-594	-482	intron_retention	FALSE	canonical	NA	NA	NA	NA	NA	NA	NA	TRUE	NA	NA	NA	B	coding	218	657	161	817	2046968	2040472	FALSE	75	AAAAAAAAAAAAAGACTATC	NA	NA	NA	NA	AAAAAG	-7_x000D_
PB.2880.4	LUXX01005638.1	-	1633	6	novel_not_in_catalog	ENSSSCG00025001209	novel	6855	19	NA	NA	-597	8	at_least_one_novel_splicesite	FALSE	canonical	NA	NA	NA	NA	NA	NA	NA	TRUE	NA	NA	NA	B	coding	218	657	164	820	2046968	2040472	FALSE	35	ACTGGATTACAAAACTCTTG	NA	NA	NA	NA	AATAAA	-17_x000D_
PB.2881.1	LUXX01005638.1	-	2944	14	full-splice_match	ENSSSCG00025001372	ENSSSCT00025001738	2962	14	16	2	16	-2	multi-exon	FALSE	canonical	NA	NA	NA	NA	NA	NA	NA	TRUE	NA	NA	NA	A	coding	616	1851	36	1886	2066965	2049701	FALSE	0	TGCTTGTGGTTTCTCTGTTC	NA	NA	NA	NA	AATAAA	-14_x000D_
PB.2882.1	LUXX01005638.1	-	4145	22	novel_in_catalog	ENSSSCG00025001897	novel	5228	22	NA	NA	2	0	combination_of_known_junctions	FALSE	canonical	NA	NA	NA	NA	NA	NA	NA	TRUE	NA	NA	NA	B	coding	988	2967	127	3093	2110891	2085981	FALSE	90	AAGAAAAAAAGAAAAAAAAA	NA	NA	NA	NA	NA	NA_x000D_
PB.2882.2	LUXX01005638.1	-	4160	23	novel_not_in_catalog	ENSSSCG00025001897	novel	4332	25	NA	NA	-5350	0	at_least_one_novel_splicesite	FALSE	canonical	NA	NA	NA	NA	NA	NA	NA	TRUE	NA	NA	NA	B	coding	973	2922	187	3108	2115892	2085981	FALSE	90	AAGAAAAAAAGAAAAAAAAA	NA	NA	NA	NA	NA	NA_x000D_
PB.2882.3	LUXX01005638.1	-	4060	22	novel_in_catalog	ENSSSCG00025001897	novel	4084	22	NA	NA	0	0	combination_of_known_junctions	TRUE	canonical	NA	NA	NA	NA	NA	NA	NA	TRUE	NA	NA	NA	B	coding	961	2886	123	3008	2102786	2085981	FALSE	90	AAGAAAAAAAGAAAAAAAAA	NA	NA	NA	NA	NA	NA_x000D_
PB.2882.4	LUXX01005638.1	-	3994	22	novel_not_in_catalog	ENSSSCG00025001897	novel	5228	22	NA	NA	-1565	0	at_least_one_novel_splicesite	FALSE	canonical	NA	NA	NA	NA	NA	NA	NA	TRUE	NA	NA	NA	B	coding	961	2886	57	2942	2102786	2085981	FALSE	90	AAGAAAAAAAGAAAAAAAAA	NA	NA	NA	NA	NA	NA_x000D_
PB.2882.9	LUXX01005638.1	-	4086	23	novel_not_in_catalog	ENSSSCG00025001897	novel	4332	25	NA	NA	-5073	-1	at_least_one_novel_splicesite	FALSE	canonical	NA	NA	NA	NA	NA	NA	NA	TRUE	NA	NA	NA	B	coding	973	2922	114	3035	2115892	2085981	FALSE	85	TAAGAAAAAAAGAAAAAAAA	NA	NA	NA	NA	NA	NA_x000D_
PB.2883.1	LUXX01005638.1	-	1076	6	novel_not_in_catalog	ENSSSCG00025002144	novel	1078	6	NA	NA	0	0	intron_retention	FALSE	canonical	NA	NA	NA	NA	NA	NA	NA	TRUE	NA	NA	NA	A	coding	183	552	48	599	2153843	2143884	FALSE	15	AGTTGTCCATTTTCCCCTCA	NA	NA	NA	NA	AATAAA	-17_x000D_
PB.2884.1	LUXX01005638.1	-	3552	11	novel_in_catalog	ENSSSCG00025002228	novel	3074	13	NA	NA	-12	-1	intron_retention	FALSE	canonical	NA	NA	NA	NA	NA	NA	NA	TRUE	NA	NA	NA	A	coding	601	1806	27	1832	2188699	2172083	FALSE	10	GAGGGTGTCGTGATGTTTGT	NA	NA	NA	NA	AATAAA	-19_x000D_
PB.2885.1	LUXX01005638.1	+	2187	11	incomplete-splice_match	ENSSSCG00025002676	ENSSSCT00025003561	3713	16	23076	2126	17	-1448	internal_fragment	FALSE	canonical	NA	NA	NA	NA	NA	NA	NA	TRUE	NA	NA	NA	B	coding	572	1719	363	2081	2245978	2263895	FALSE	5	ACTCGCTGCCCTGGCTTTTC	NA	NA	NA	NA	ATTAAA	-18_x000D_
PB.2885.10	LUXX01005638.1	+	2574	1	intergenic	novelGene_233	novel	NA	NA	NA	NA	NA	NA	mono-exon	FALSE	NA	NA	NA	NA	NA	NA	NA	NA	NA	NA	NA	NA	A	non_coding	NA	NA	NA	NA	NA	NA	NA	80	AAAAAGACAAAAGACAAAAA	NA	NA	NA	NA	NA	NA_x000D_
PB.2885.2	LUXX01005638.1	+	3109	12	incomplete-splice_match	ENSSSCG00025002676	ENSSSCT00025003561	3713	16	29993	-8	6934	8	5prime_fragment	FALSE	canonical	NA	NA	NA	NA	NA	NA	NA	TRUE	NA	NA	NA	B	coding	664	1995	207	2201	2245978	2265227	FALSE	0	CTGCCGTGGTGTCTGTCTTT	NA	NA	NA	NA	AATACA	-21_x000D_
PB.2885.3	LUXX01005638.1	+	2911	13	novel_not_in_catalog	ENSSSCG00025002676	novel	3713	16	NA	NA	6934	1	intron_retention	FALSE	canonical	NA	NA	NA	NA	NA	NA	NA	TRUE	NA	NA	NA	B	coding	537	1614	399	2012	2258250	2265227	FALSE	5	TATCCCTGGCTGCCGTGGTG	NA	NA	NA	NA	AATACA	-12_x000D_
PB.2885.4	LUXX01005638.1	+	2651	13	novel_not_in_catalog	ENSSSCG00025002676	novel	3713	16	NA	NA	6934	0	at_least_one_novel_splicesite	FALSE	non_canonical	NA	NA	NA	NA	NA	NA	NA	TRUE	NA	NA	NA	B	coding	664	1995	207	2201	2245978	2265227	TRUE	5	ATCCCTGGCTGCCGTGGTGT	NA	NA	NA	NA	AATACA	-13_x000D_
PB.2885.5	LUXX01005638.1	+	2468	12	novel_not_in_catalog	ENSSSCG00025002676	novel	3713	16	NA	NA	6934	6	intron_retention	FALSE	non_canonical	NA	NA	NA	NA	NA	NA	NA	TRUE	NA	NA	NA	B	coding	672	2019	207	2225	2245978	2265890	FALSE	0	GGCTGCCGTGGTGTCTGTCT	NA	NA	NA	NA	AATACA	-19_x000D_
PB.2885.6	LUXX01005638.1	+	2398	12	incomplete-splice_match	ENSSSCG00025002676	ENSSSCT00025003561	3713	16	29993	703	6934	-25	5prime_fragment	FALSE	canonical	NA	NA	NA	NA	NA	NA	NA	TRUE	NA	NA	NA	B	coding	664	1995	207	2201	2245978	2265227	FALSE	75	AAAAACACAAGCAAAGAAAA	NA	NA	NA	NA	NA	NA_x000D_
PB.2885.8	LUXX01005638.1	+	1458	5	novel_not_in_catalog	ENSSSCG00025002676	novel	3713	16	NA	NA	6934	1	intron_retention	FALSE	non_canonical	NA	NA	NA	NA	NA	NA	NA	TRUE	NA	NA	NA	B	coding	125	378	182	559	2263794	2265227	FALSE	5	TATCCCTGGCTGCCGTGGTG	NA	NA	NA	NA	AATACA	-12_x000D_
PB.2885.9	LUXX01005638.1	+	3877	11	novel_in_catalog	ENSSSCG00025002676	novel	3339	14	NA	NA	6972	6	intron_retention	FALSE	canonical	NA	NA	NA	NA	NA	NA	NA	TRUE	NA	NA	NA	B	coding	572	1719	169	1887	2245978	2263895	TRUE	0	GGCTGCCGTGGTGTCTGTCT	NA	NA	NA	NA	AATACA	-19_x000D_
PB.2886.1	LUXX01005638.1	+	3590	4	incomplete-splice_match	ENSSSCG00025003106	ENSSSCT00025004132	4410	8	-17	25251	-17	-25251	3prime_fragment	FALSE	canonical	NA	NA	NA	NA	NA	NA	NA	TRUE	NA	NA	NA	B	coding	314	945	162	1106	2314549	2325639	FALSE	15	AACTTTGCGCTTATTTTCCC	NA	NA	NA	NA	ATTAAA	-20_x000D_
PB.2886.2	LUXX01005638.1	+	2294	4	incomplete-splice_match	ENSSSCG00025003106	ENSSSCT00025004132	4410	8	-14	26544	-14	-26544	3prime_fragment	FALSE	canonical	NA	NA	NA	NA	NA	NA	NA	TRUE	NA	NA	NA	B	coding	314	945	159	1103	2314549	2325639	FALSE	75	TAAAGAAAAAAAGAGAAAGA	NA	NA	NA	NA	NA	NA_x000D_
PB.2887.1	LUXX01005638.1	-	4558	22	novel_in_catalog	ENSSSCG00025003439	novel	5357	37	NA	NA	0	8	intron_retention	FALSE	canonical	NA	NA	NA	NA	NA	NA	NA	TRUE	NA	NA	NA	A	coding	1016	3051	152	3202	2394548	2364664	FALSE	5	ACTCCCTGTCTTCTGGTGCC	NA	NA	NA	NA	AATAAA	-17_x000D_
PB.2888.1	LUXX01005638.1	-	3594	6	full-splice_match	ENSSSCG00025003663	ENSSSCT00025004869	3584	6	0	-10	0	9	multi-exon	FALSE	canonical	NA	NA	NA	NA	NA	NA	NA	TRUE	NA	NA	NA	C	coding	406	1221	25	1245	2406067	2403477	FALSE	30	AGTACATTCCACTGTATTTA	NA	NA	NA	NA	TATAAA	-27_x000D_
PB.2888.2	LUXX01005638.1	-	3912	4	novel_in_catalog	ENSSSCG00025003663	novel	3584	6	NA	NA	-9	3	intron_retention	FALSE	canonical	NA	NA	NA	NA	NA	NA	NA	TRUE	NA	NA	NA	C	coding	154	465	34	498	2406067	2405111	TRUE	25	AGCTGCAGTACATTCCACTG	NA	NA	NA	NA	TATAAA	-21_x000D_
PB.2888.3	LUXX01005638.1	-	1575	6	full-splice_match	ENSSSCG00025003663	ENSSSCT00025004869	3584	6	10	1999	10	-1999	multi-exon	FALSE	canonical	NA	NA	NA	NA	NA	NA	NA	TRUE	NA	NA	NA	C	coding	406	1221	15	1235	2406067	2403477	FALSE	15	CTTATCTCTCAGTGTGTGAG	NA	NA	NA	NA	AATAGA	-19_x000D_
PB.2889.1	LUXX01005638.1	-	2905	13	novel_in_catalog	ENSSSCG00025003858	novel	2038	14	NA	NA	-26	-1	intron_retention	FALSE	canonical	NA	NA	NA	NA	NA	NA	NA	TRUE	NA	NA	NA	C	coding	393	1182	122	1303	2431148	2414375	TRUE	20	AGACAGTTGTTATGTGTTTT	NA	NA	NA	NA	ATTAAA	-14_x000D_
PB.2889.2	LUXX01005638.1	-	1859	12	novel_in_catalog	ENSSSCG00025003858	novel	2038	14	NA	NA	-13	-1	combination_of_known_splicesites	FALSE	canonical	NA	NA	NA	NA	NA	NA	NA	TRUE	NA	NA	NA	C	coding	507	1524	109	1632	2431148	2412131	FALSE	20	AGACAGTTGTTATGTGTTTT	NA	NA	NA	NA	ATTAAA	-14_x000D_
PB.2889.5	LUXX01005638.1	-	1945	14	full-splice_match	ENSSSCG00025003858	ENSSSCT00025005297	2038	14	94	-1	14	1	multi-exon	FALSE	canonical	NA	NA	NA	NA	NA	NA	NA	TRUE	NA	NA	NA	C	coding	545	1638	82	1719	2431148	2412131	FALSE	20	GAGACAGTTGTTATGTGTTT	NA	NA	NA	NA	ATTAAA	-13_x000D_
PB.2890.1	LUXX01005638.1	+	944	6	incomplete-splice_match	ENSSSCG00025004506	ENSSSCT00025006048	3860	7	277	2696	277	-2696	3prime_fragment	TRUE	canonical	NA	NA	NA	NA	NA	NA	NA	TRUE	NA	NA	NA	A	coding	237	714	177	890	2670657	2673129	FALSE	20	AACTGTGGCATCCTGGGAGC	NA	NA	NA	NA	AATAAA	-24_x000D_
PB.2891.2	LUXX01005638.1	-	1999	4	full-splice_match	ENSSSCG00025004623	ENSSSCT00025006225	2299	4	295	5	295	-5	multi-exon	FALSE	canonical	NA	NA	NA	NA	NA	NA	NA	TRUE	NA	NA	NA	A	coding	343	1032	159	1190	2799167	2794803	FALSE	40	AAAAACAGTTGTGCAATGTT	NA	NA	NA	NA	TATAAA	-3_x000D_
PB.2892.1	LUXX01005638.1	-	1009	6	novel_in_catalog	ENSSSCG00025004657	novel	994	7	NA	NA	-85	9	combination_of_known_splicesites	FALSE	canonical	NA	NA	NA	NA	NA	NA	NA	TRUE	NA	NA	NA	B	coding	216	651	257	907	2809984	2808685	FALSE	15	AGCTGCTGTCTTCTGGTAGA	NA	NA	NA	NA	AATAAA	-26_x000D_
PB.2892.2	LUXX01005638.1	-	837	6	novel_not_in_catalog	ENSSSCG00025004657	novel	994	7	NA	NA	-58	-2	at_least_one_novel_splicesite	FALSE	canonical	NA	NA	NA	NA	NA	NA	NA	TRUE	NA	NA	NA	B	coding	216	651	96	746	2809984	2808685	FALSE	10	CCTCTGTGTACAGCTGCTGT	NA	NA	NA	NA	AATAAA	-15_x000D_
PB.2893.1	LUXX01005638.1	-	1728	6	novel_in_catalog	ENSSSCG00025004676	novel	1626	7	NA	NA	-5	-27	intron_retention	FALSE	canonical	NA	NA	NA	NA	NA	NA	NA	TRUE	NA	NA	NA	A	coding	243	732	92	823	2824661	2816026	FALSE	75	AATAAAAGAAAATTACAAAA	NA	NA	NA	NA	NA	NA_x000D_
PB.2894.1	LUXX01005638.1	+	2780	1	novel_in_catalog	ENSSSCG00025004689	novel	1593	6	NA	NA	15	-24916	mono-exon	FALSE	NA	NA	NA	NA	NA	NA	NA	NA	NA	NA	NA	NA	C	coding	176	531	238	768	2841769	2842299	NA	65	AAAAAAAAGAAAAAGTTGCT	NA	NA	NA	NA	NA	NA_x000D_
PB.2894.2	LUXX01005638.1	+	2228	7	full-splice_match	ENSSSCG00025004689	ENSSSCT00025006342	2429	7	-21	222	15	-222	multi-exon	FALSE	canonical	NA	NA	NA	NA	NA	NA	NA	TRUE	NA	NA	NA	C	coding	491	1476	238	1713	2841769	2868490	FALSE	15	ATTACTTTGCATTTTTTCCT	NA	NA	NA	NA	NA	NA_x000D_
PB.2894.3	LUXX01005638.1	+	2087	7	full-splice_match	ENSSSCG00025004689	ENSSSCT00025006342	2429	7	-21	363	15	-363	multi-exon	FALSE	canonical	NA	NA	NA	NA	NA	NA	NA	TRUE	NA	NA	NA	C	coding	491	1476	238	1713	2841769	2868490	FALSE	10	AGACGCTGCCTGCCCTGTCC	NA	NA	NA	NA	AATAAA	-15_x000D_
PB.2895.1	LUXX01005638.1	-	4789	5	full-splice_match	ENSSSCG00025004764	ENSSSCT00025006459	5252	5	-139	602	-139	-602	multi-exon	FALSE	canonical	NA	NA	NA	NA	NA	NA	NA	TRUE	NA	NA	NA	C	coding	511	1536	233	1768	3199429	3190938	FALSE	80	AAAAAAAAAAAAAAATAGTT	NA	NA	NA	NA	AAGAAA	-15_x000D_
PB.2895.2	LUXX01005638.1	-	2395	4	incomplete-splice_match	ENSSSCG00025004764	ENSSSCT00025006459	5252	5	33	7921	33	-7921	3prime_fragment	FALSE	canonical	NA	NA	NA	NA	NA	NA	NA	TRUE	NA	NA	NA	C	coding	147	444	61	504	3199429	3197127	FALSE	90	AAAGACAAAAAAAAAAAAAA	NA	NA	NA	NA	NA	NA_x000D_
PB.5204.1	LUXX01005737.1	-	5240	17	full-splice_match	ENSSSCG00025004839	ENSSSCT00025006556	5268	17	31	-3	31	3	multi-exon	FALSE	canonical	NA	NA	NA	NA	NA	NA	NA	TRUE	NA	NA	NA	C	coding	857	2574	455	3028	889232	853462	TRUE	35	AAAATCACTCAGAGTGGTCC	NA	NA	NA	NA	AATAAA	-19_x000D_
PB.5204.2	LUXX01005737.1	-	5210	16	incomplete-splice_match	ENSSSCG00025004839	ENSSSCT00025006544	6677	17	-105	1636	15	3	3prime_fragment	FALSE	canonical	NA	NA	NA	NA	NA	NA	NA	TRUE	NA	NA	NA	C	coding	911	2736	471	3206	889232	853167	FALSE	35	AAAATCACTCAGAGTGGTCC	NA	NA	NA	NA	AATAAA	-19_x000D_
PB.5204.3	LUXX01005737.1	-	4887	16	incomplete-splice_match	ENSSSCG00025004839	ENSSSCT00025006544	6677	17	-87	1941	33	-302	3prime_fragment	FALSE	canonical	NA	NA	NA	NA	NA	NA	NA	TRUE	NA	NA	NA	C	coding	911	2736	453	3188	889232	853167	FALSE	25	AGTGTGCTTGCTAATCATAT	NA	NA	NA	NA	TATAAA	-44_x000D_
PB.5204.4	LUXX01005737.1	-	4926	17	full-splice_match	ENSSSCG00025004839	ENSSSCT00025006556	5268	17	33	309	33	-309	multi-exon	FALSE	canonical	NA	NA	NA	NA	NA	NA	NA	TRUE	NA	NA	NA	C	coding	857	2574	453	3026	889232	853462	TRUE	35	AAAAATCAGTGTGCTTGCTA	NA	NA	NA	NA	TATAAA	-37_x000D_
PB.5204.5	LUXX01005737.1	-	4769	17	full-splice_match	ENSSSCG00025004839	ENSSSCT00025006556	5268	17	18	481	18	-481	multi-exon	FALSE	canonical	NA	NA	NA	NA	NA	NA	NA	TRUE	NA	NA	NA	C	coding	857	2574	468	3041	889232	853462	TRUE	25	ACAAAGTTGGCTTTTGACTT	NA	NA	NA	NA	AATATA	-45_x000D_
PB.5204.6	LUXX01005737.1	-	4653	16	incomplete-splice_match	ENSSSCG00025004839	ENSSSCT00025006544	6677	17	-32	2120	-32	-481	3prime_fragment	FALSE	canonical	NA	NA	NA	NA	NA	NA	NA	TRUE	NA	NA	NA	C	coding	911	2736	398	3133	889232	853167	FALSE	25	ACAAAGTTGGCTTTTGACTT	NA	NA	NA	NA	AATATA	-45_x000D_
PB.5204.7	LUXX01005737.1	-	4307	17	full-splice_match	ENSSSCG00025004839	ENSSSCT00025006556	5268	17	39	922	39	-922	multi-exon	FALSE	canonical	NA	NA	NA	NA	NA	NA	NA	TRUE	NA	NA	NA	C	coding	857	2574	447	3020	889232	853462	TRUE	50	AACAAAAGGACTAGTGTAAT	NA	NA	NA	NA	AAAAAG	-43_x000D_
PB.5204.8	LUXX01005737.1	-	4225	17	full-splice_match	ENSSSCG00025004839	ENSSSCT00025006556	5268	17	15	1028	15	-1028	multi-exon	FALSE	canonical	NA	NA	NA	NA	NA	NA	NA	TRUE	NA	NA	NA	C	coding	857	2574	471	3044	889232	853462	TRUE	25	AAATATCTTGGTGATTGCTT	NA	NA	NA	NA	AATAGA	-24_x000D_
PB.5204.9	LUXX01005737.1	-	1479	3	incomplete-splice_match	ENSSSCG00025004839	ENSSSCT00025006556	5268	17	31	28148	31	-28148	3prime_fragment	FALSE	canonical	NA	NA	NA	NA	NA	NA	NA	TRUE	NA	NA	NA	C	coding	127	384	455	838	889232	879955	FALSE	95	AAAAAAAGAAAAAAAAAAAA	NA	NA	NA	NA	AATAAA	-43_x000D_
PB.5205.1	LUXX01005737.1	+	3812	15	novel_in_catalog	ENSSSCG00025004918	novel	3807	15	NA	NA	-27	2	combination_of_known_junctions	FALSE	canonical	NA	NA	NA	NA	NA	NA	NA	TRUE	NA	NA	NA	A	coding	1119	3360	39	3398	1266467	1318339	FALSE	95	AAAAAAAAAAAAAAAAAGAA	NA	NA	NA	NA	NA	NA_x000D_
PB.5206.1	LUXX01005737.1	-	1662	1	incomplete-splice_match	ENSSSCG00025011772	ENSSSCT00025015689	5655	10	65662	887	65229	0	mono-exon	FALSE	NA	NA	NA	NA	NA	NA	NA	NA	NA	NA	NA	NA	A	non_coding	NA	NA	NA	NA	NA	NA	NA	30	AAAGACCTTGTGTGATGATG	NA	NA	NA	NA	AATATA	-8_x000D_
PB.6067.1	LUXX01005741.1	-	3124	2	antisense	novelGene_ENSSSCG00025013440_AS	novel	NA	NA	NA	NA	NA	NA	multi-exon	TRUE	non_canonical	NA	NA	NA	NA	NA	NA	NA	FALSE	NA	NA	NA	A	coding	59	180	123	302	446776	446597	TRUE	75	AAACAAAGAAGCAAAAACAA	NA	NA	NA	NA	NA	NA_x000D_
PB.6068.1	LUXX01005741.1	-	1956	12	incomplete-splice_match	ENSSSCG00025014343	ENSSSCT00025019283	2573	13	19256	-1	-3949	0	5prime_fragment	FALSE	canonical	NA	NA	NA	NA	NA	NA	NA	TRUE	NA	NA	NA	B	coding	421	1266	31	1296	818217	786721	FALSE	20	TATCTGTTCAATTTGTGTAT	NA	NA	NA	NA	AATAAA	-17_x000D_
PB.6068.2	LUXX01005741.1	-	1855	12	incomplete-splice_match	ENSSSCG00025014343	ENSSSCT00025019283	2573	13	19256	100	-3949	-100	5prime_fragment	FALSE	canonical	NA	NA	NA	NA	NA	NA	NA	TRUE	NA	NA	NA	B	coding	421	1266	31	1296	818217	786721	FALSE	20	ATTTTTATATGATTCTGTTG	NA	NA	NA	NA	AATAAA	-16_x000D_
PB.6069.1	LUXX01005741.1	-	1193	1	intergenic	novelGene_478	novel	NA	NA	NA	NA	NA	NA	mono-exon	FALSE	NA	NA	NA	NA	NA	NA	NA	NA	NA	NA	NA	NA	A	non_coding	NA	NA	NA	NA	NA	NA	NA	95	NAAAAAAAAAAAAAAAAAAA	NA	NA	NA	NA	NA	NA_x000D_
PB.7321.1	LUXX01005759.1	+	6758	45	full-splice_match	ENSSSCG00025000926	ENSSSCT00025001143	7446	45	-59	747	-59	-747	multi-exon	FALSE	canonical	NA	NA	NA	NA	NA	NA	NA	TRUE	NA	NA	NA	C	coding	2142	6429	129	6557	8920	57400	FALSE	15	ACTGCTGTGTTTGGCTTAAC	NA	NA	NA	NA	AGTAAA	-24_x000D_
PB.7321.2	LUXX01005759.1	+	3083	22	incomplete-splice_match	ENSSSCG00025000926	ENSSSCT00025001143	7446	45	-57	23520	-57	-23520	3prime_fragment	FALSE	canonical	NA	NA	NA	NA	NA	NA	NA	TRUE	NA	NA	NA	C	coding	985	2955	127	3081	8920	34826	FALSE	55	AGAAAAGAAACTGAAATCTC	NA	NA	NA	NA	NA	NA_x000D_
PB.4180.1	LUXX01005801.1	+	2504	7	incomplete-splice_match	ENSSSCG00025001799	ENSSSCT00025002293	4719	11	-15	10468	-15	-10468	3prime_fragment	FALSE	canonical	NA	NA	NA	NA	NA	NA	NA	TRUE	NA	NA	NA	A	coding	291	876	145	1020	281561	303298	FALSE	80	AAAAAAGAAAATGACAAAAA	NA	NA	NA	NA	CATAAA	-22_x000D_
PB.4181.1	LUXX01005801.1	-	3233	21	incomplete-splice_match	ENSSSCG00025002117	ENSSSCT00025002975	3504	26	62869	-657	62869	252	5prime_fragment	TRUE	canonical	NA	NA	NA	NA	NA	NA	NA	TRUE	NA	NA	NA	A	coding	682	2049	138	2186	352410	309837	FALSE	35	AATAACTGATTACTTTTTAC	NA	NA	NA	NA	AATAAA	-17_x000D_
PB.4182.1	LUXX01005801.1	+	2171	1	intergenic	novelGene_334	novel	NA	NA	NA	NA	NA	NA	mono-exon	FALSE	NA	NA	NA	NA	NA	NA	NA	NA	NA	NA	NA	NA	A	non_coding	NA	NA	NA	NA	NA	NA	NA	95	AAAAAAAAAAAAAAAAAAAC	NA	NA	NA	NA	AAAACA	-16_x000D_
PB.4183.1	LUXX01005801.1	-	429	3	incomplete-splice_match	ENSSSCG00025002477	ENSSSCT00025003198	3696	4	15	5322	15	-5322	3prime_fragment	FALSE	canonical	NA	NA	NA	NA	NA	NA	NA	TRUE	NA	NA	NA	A	non_coding	NA	NA	NA	NA	NA	NA	NA	35	GAACATAATAGTTGAGCGTG	NA	NA	NA	NA	AATAAA	-39_x000D_
PB.7010.1	LUXX01005929.1	-	3348	4	full-splice_match	ENSSSCG00025007268	ENSSSCT00025009655	4229	4	4	877	4	-877	multi-exon	FALSE	canonical	NA	NA	NA	NA	NA	NA	NA	TRUE	NA	NA	NA	A	coding	477	1434	215	1648	578470	568121	FALSE	80	AAAAAAAAAAAAGAAAAGCT	NA	NA	NA	NA	NA	NA_x000D_
PB.2763.1	LUXX01005957.1	+	2765	2	full-splice_match	ENSSSCG00025007348	ENSSSCT00025009782	5663	2	1	2897	1	-2897	multi-exon	FALSE	canonical	NA	NA	NA	NA	NA	NA	NA	TRUE	NA	NA	NA	A	coding	386	1161	16	1176	111242	126199	FALSE	70	AAAAATCATAGAAGAAAACA	NA	NA	NA	NA	NA	NA_x000D_
PB.4167.1	LUXX01006132.1	-	2324	1	antisense	novelGene_ENSSSCG00025001938_AS	novel	NA	NA	NA	NA	NA	NA	mono-exon	FALSE	NA	NA	NA	NA	NA	NA	NA	NA	NA	NA	NA	NA	B	non_coding	NA	NA	NA	NA	NA	NA	NA	10	ATTTGGAGTGCCTGCTTTTC	NA	NA	NA	NA	AATAAA	-14_x000D_
PB.4167.2	LUXX01006132.1	-	1801	1	antisense	novelGene_ENSSSCG00025001938_AS	novel	NA	NA	NA	NA	NA	NA	mono-exon	FALSE	NA	NA	NA	NA	NA	NA	NA	NA	NA	NA	NA	NA	B	non_coding	NA	NA	NA	NA	NA	NA	NA	55	AGAAAAGTTGATAAAAAGGT	NA	NA	NA	NA	NA	NA_x000D_
PB.4167.3	LUXX01006132.1	-	1438	1	antisense	novelGene_ENSSSCG00025001938_AS	novel	NA	NA	NA	NA	NA	NA	mono-exon	FALSE	NA	NA	NA	NA	NA	NA	NA	NA	NA	NA	NA	NA	B	non_coding	NA	NA	NA	NA	NA	NA	NA	60	AAAGAGGAAAAGAGAGGGAA	NA	NA	NA	NA	NA	NA_x000D_
PB.4167.4	LUXX01006132.1	-	921	1	antisense	novelGene_ENSSSCG00025001938_AS	novel	NA	NA	NA	NA	NA	NA	mono-exon	FALSE	NA	NA	NA	NA	NA	NA	NA	NA	NA	NA	NA	NA	B	non_coding	NA	NA	NA	NA	NA	NA	NA	60	AAAAAGAAAAGATACTTTTA	NA	NA	NA	NA	NA	NA_x000D_
PB.4168.1	LUXX01006132.1	+	1071	6	incomplete-splice_match	ENSSSCG00025002380	ENSSSCT00025003084	1745	9	8129	18	8129	7	5prime_fragment	FALSE	canonical	NA	NA	NA	NA	NA	NA	NA	TRUE	NA	NA	NA	A	coding	106	321	172	492	248626	251203	TRUE	60	AAAAAAATTGTATAAGTGAA	NA	NA	NA	NA	AATAAA	-19_x000D_
PB.4169.1	LUXX01006132.1	+	899	5	full-splice_match	ENSSSCG00025002520	ENSSSCT00025003260	899	5	0	0	0	0	multi-exon	FALSE	canonical	NA	NA	NA	NA	NA	NA	NA	TRUE	NA	NA	NA	A	coding	148	447	60	506	318429	326131	FALSE	15	GATGGAGAGTGTTTTTTTTT	NA	NA	NA	NA	AATAAA	-16_x000D_
PB.4170.1	LUXX01006132.1	-	1893	4	full-splice_match	ENSSSCG00025003159	ENSSSCT00025004181	1935	4	35	7	35	-7	multi-exon	FALSE	canonical	NA	NA	NA	NA	NA	NA	NA	TRUE	NA	NA	NA	C	coding	117	354	251	604	660241	652353	FALSE	40	AAAAAACCTACCTTGAGTTC	NA	NA	NA	NA	AATAAA	-15_x000D_
PB.4170.2	LUXX01006132.1	-	1304	4	full-splice_match	ENSSSCG00025003159	ENSSSCT00025004181	1935	4	40	591	40	-591	multi-exon	FALSE	canonical	NA	NA	NA	NA	NA	NA	NA	TRUE	NA	NA	NA	C	coding	117	354	246	599	660241	652353	FALSE	25	ACTGAGCATCCCTGTCTAAC	NA	NA	NA	NA	ATTAAA	-17_x000D_
PB.4171.1	LUXX01006132.1	-	1893	4	incomplete-splice_match	ENSSSCG00025003242	ENSSSCT00025004252	1973	6	2692	-8	2692	8	5prime_fragment	FALSE	canonical	NA	NA	NA	NA	NA	NA	NA	TRUE	NA	NA	NA	A	non_coding	NA	NA	NA	NA	NA	NA	NA	20	GGAGATGATGTGATTCCTGT	NA	NA	NA	NA	AATAAA	-26_x000D_
PB.4172.1	LUXX01006132.1	+	2506	6	full-splice_match	ENSSSCG00025003349	ENSSSCT00025004459	2561	6	55	0	55	0	multi-exon	FALSE	canonical	NA	NA	NA	NA	NA	NA	NA	TRUE	NA	NA	NA	A	coding	274	825	60	884	692096	701711	FALSE	35	TATATCCTGAAGTTTGATAA	NA	NA	NA	NA	AATAAA	-20_x000D_
PB.4173.1	LUXX01006132.1	+	4620	35	novel_not_in_catalog	ENSSSCG00025012857	novel	4797	37	NA	NA	265	6	at_least_one_novel_splicesite	TRUE	non_canonical	NA	NA	NA	NA	NA	NA	NA	TRUE	NA	NA	NA	A	coding	1168	3507	997	4503	1343509	1378014	FALSE	30	AGAGTCTATCAGTACCTTCA	NA	NA	NA	NA	AATAAA	-23_x000D_
PB.4174.1	LUXX01006132.1	+	1652	7	incomplete-splice_match	ENSSSCG00025013894	ENSSSCT00025018590	1518	8	-276	1075	-3	374	3prime_fragment	FALSE	canonical	NA	NA	NA	NA	NA	NA	NA	TRUE	NA	NA	NA	B	coding	278	837	445	1281	1445261	1450210	FALSE	90	AAAAAAAAAAAAAAAGCAAA	NA	NA	NA	NA	TTTAAA	-42_x000D_
PB.4174.2	LUXX01006132.1	+	1726	8	novel_not_in_catalog	ENSSSCG00025013894	novel	6712	8	NA	NA	17	374	at_least_one_novel_splicesite	FALSE	canonical	NA	NA	NA	NA	NA	NA	NA	TRUE	NA	NA	NA	B	coding	278	837	519	1355	1445261	1450210	FALSE	90	AAAAAAAAAAAAAAAGCAAA	NA	NA	NA	NA	TTTAAA	-42_x000D_
PB.4174.3	LUXX01006132.1	+	2454	7	incomplete-splice_match	ENSSSCG00025013894	ENSSSCT00025018590	1518	8	12	-15	12	2	intron_retention	FALSE	canonical	NA	NA	NA	NA	NA	NA	NA	TRUE	NA	NA	NA	B	coding	278	837	157	993	1445261	1450210	FALSE	60	AAAAAAAAAAAAGCTGGTCT	NA	NA	NA	NA	CATAAA	-8_x000D_
PB.4175.1	LUXX01006132.1	-	2249	6	incomplete-splice_match	ENSSSCG00025014697	ENSSSCT00025019661	6743	9	141	9482	141	-9481	3prime_fragment	FALSE	canonical	NA	NA	NA	NA	NA	NA	NA	TRUE	NA	NA	NA	B	coding	386	1161	237	1397	1594407	1580654	FALSE	40	AAACATGTGCATTTAAAGCC	NA	NA	NA	NA	AAGAAA	-35_x000D_
PB.4175.2	LUXX01006132.1	-	2131	6	novel_not_in_catalog	ENSSSCG00025014697	novel	6743	9	NA	NA	694	-9481	at_least_one_novel_splicesite	FALSE	canonical	NA	NA	NA	NA	NA	NA	NA	TRUE	NA	NA	NA	B	coding	386	1161	119	1279	1594407	1580654	FALSE	40	AAACATGTGCATTTAAAGCC	NA	NA	NA	NA	AAGAAA	-35_x000D_
PB.4176.1	LUXX01006132.1	-	4129	10	novel_not_in_catalog	ENSSSCG00025015461	novel	4218	11	NA	NA	66176	2	at_least_one_novel_splicesite	FALSE	canonical	NA	NA	NA	NA	NA	NA	NA	TRUE	NA	NA	NA	C	coding	493	1482	141	1622	1869622	1860510	FALSE	15	CCCCGGTGAGAATTCTTCTG	NA	NA	NA	NA	AATAAA	-17_x000D_
PB.4176.3	LUXX01006132.1	-	4223	11	full-splice_match	ENSSSCG00025015461	ENSSSCT00025020882	4218	11	-236	231	-236	-231	multi-exon	FALSE	canonical	NA	NA	NA	NA	NA	NA	NA	TRUE	NA	NA	NA	C	coding	495	1488	462	1949	1934028	1860510	FALSE	30	AAACATCACAGGCCTGTTTT	NA	NA	NA	NA	AATAAA	-19_x000D_
PB.4176.5	LUXX01006132.1	-	3892	10	novel_not_in_catalog	ENSSSCG00025015461	novel	4218	11	NA	NA	66176	-235	at_least_one_novel_splicesite	FALSE	canonical	NA	NA	NA	NA	NA	NA	NA	TRUE	NA	NA	NA	C	coding	493	1482	141	1622	1869622	1860510	FALSE	40	ATATAAACATCACAGGCCTG	NA	NA	NA	NA	AATAAA	-15_x000D_
PB.4177.1	LUXX01006132.1	+	2518	8	novel_in_catalog	ENSSSCG00025016004	novel	2658	10	NA	NA	0	-5	combination_of_known_junctions	FALSE	canonical	NA	NA	NA	NA	NA	NA	NA	TRUE	NA	NA	NA	B	coding	275	828	19	846	2017232	2028143	FALSE	30	AAAAAGGTAGTGTCTCTTTT	NA	NA	NA	NA	ATTAAA	-8_x000D_
PB.4177.2	LUXX01006132.1	+	2504	8	incomplete-splice_match	ENSSSCG00025016004	ENSSSCT00025021540	6635	9	7	4174	2	-5	3prime_fragment	FALSE	canonical	NA	NA	NA	NA	NA	NA	NA	TRUE	NA	NA	NA	B	coding	271	816	17	832	2017232	2028143	FALSE	30	AAAAAGGTAGTGTCTCTTTT	NA	NA	NA	NA	ATTAAA	-8_x000D_
PB.7416.1	LUXX01006222.1	+	2249	3	full-splice_match	ENSSSCG00025017064	ENSSSCT00025023017	7134	3	6127	-1242	6127	1242	multi-exon	FALSE	canonical	NA	NA	NA	NA	NA	NA	NA	TRUE	NA	NA	NA	C	coding	188	567	392	958	81500	82066	FALSE	5	TGTTTTTATCTCTGCTGTGT	NA	NA	NA	NA	AATAAA	-21_x000D_
PB.7416.2	LUXX01006222.1	+	3513	2	incomplete-splice_match	ENSSSCG00025017064	ENSSSCT00025023017	7134	3	6132	-1244	6132	1244	intron_retention	FALSE	canonical	NA	NA	NA	NA	NA	NA	NA	TRUE	NA	NA	NA	C	coding	693	2082	139	2220	78870	82066	FALSE	5	TTTTTATCTCTGCTGTGTTC	NA	NA	NA	NA	AATAAA	-23_x000D_
PB.7416.3	LUXX01006222.1	+	2297	3	novel_not_in_catalog	ENSSSCG00025017064	novel	7134	3	NA	NA	6132	1236	at_least_one_novel_splicesite	FALSE	canonical	NA	NA	NA	NA	NA	NA	NA	TRUE	NA	NA	NA	C	coding	188	567	446	1012	81500	82066	FALSE	5	TGTTGGTGTTTTTATCTCTG	NA	NA	NA	NA	AATAAA	-15_x000D_
PB.7416.4	LUXX01006222.1	+	4613	1	genic	ENSSSCG00025017064	novel	NA	NA	NA	NA	6141	1238	mono-exon	FALSE	NA	NA	NA	NA	NA	NA	NA	NA	NA	NA	NA	NA	C	coding	1105	3318	9	3326	78749	82066	NA	5	TTGGTGTTTTTATCTCTGCT	NA	NA	NA	NA	AATAAA	-17_x000D_
PB.7416.5	LUXX01006222.1	+	3567	2	novel_not_in_catalog	ENSSSCG00025017064	novel	7134	3	NA	NA	6141	1248	intron_retention	FALSE	canonical	NA	NA	NA	NA	NA	NA	NA	TRUE	NA	NA	NA	C	coding	753	2262	9	2270	78749	82066	FALSE	5	TATCTCTGCTGTGTTCTTTT	NA	NA	NA	NA	AATAAA	-27_x000D_
PB.7416.6	LUXX01006222.1	+	2912	1	novel_in_catalog	ENSSSCG00025017064	novel	7134	3	NA	NA	6141	-463	mono-exon_by_intron_retention	FALSE	NA	NA	NA	NA	NA	NA	NA	NA	NA	NA	NA	NA	C	coding	968	2904	9	2912	78749	81652	NA	65	AAAACCAAAAAAAATGTCAT	NA	NA	NA	NA	NA	NA_x000D_
PB.3226.1	LUXX01006283.1	+	620	5	full-splice_match	ENSSSCG00025017434	ENSSSCT00025023622	719	5	99	0	7	0	multi-exon	FALSE	canonical	NA	NA	NA	NA	NA	NA	NA	TRUE	NA	NA	NA	A	coding	155	468	24	491	26247	62505	FALSE	30	AAATGACTTGTCTATATTTT	NA	NA	NA	NA	AATAAA	-12_x000D_
PB.3227.1	LUXX01006283.1	-	3364	2	full-splice_match	ENSSSCG00025017527	ENSSSCT00025023698	3417	2	25	28	25	-28	multi-exon	FALSE	canonical	NA	NA	NA	NA	NA	NA	NA	TRUE	NA	NA	NA	C	coding	330	993	177	1169	67644	66652	FALSE	75	AATAAAAAAATAAAAGTACA	NA	NA	NA	NA	ATTAAA	-9_x000D_
PB.3227.2	LUXX01006283.1	-	2229	2	full-splice_match	ENSSSCG00025017527	ENSSSCT00025023698	3417	2	25	1163	25	-1163	multi-exon	FALSE	canonical	NA	NA	NA	NA	NA	NA	NA	TRUE	NA	NA	NA	C	coding	330	993	177	1169	67644	66652	FALSE	30	AGCCTCACATATTGACTTTA	NA	NA	NA	NA	ATTAAA	-14_x000D_
PB.3228.1	LUXX01006283.1	-	5148	14	full-splice_match	ENSSSCG00025017599	ENSSSCT00025023853	6858	14	111	1599	111	150	multi-exon	FALSE	canonical	NA	NA	NA	NA	NA	NA	NA	TRUE	NA	NA	NA	C	coding	538	1617	220	1836	133284	77436	FALSE	25	GAAAGAGTTTTCCTCAGGTT	NA	NA	NA	NA	AATAAA	-41_x000D_
PB.3228.2	LUXX01006283.1	-	3999	14	full-splice_match	ENSSSCG00025017599	ENSSSCT00025023853	6858	14	106	2753	106	-1004	multi-exon	FALSE	canonical	NA	NA	NA	NA	NA	NA	NA	TRUE	NA	NA	NA	C	coding	538	1617	225	1841	133284	77436	FALSE	5	CTTTTTTTGTGGCTGAGTTT	NA	NA	NA	NA	AGTAAA	-21_x000D_
PB.3228.3	LUXX01006283.1	-	3117	14	full-splice_match	ENSSSCG00025017599	ENSSSCT00025023853	6858	14	139	3602	139	-1853	multi-exon	FALSE	canonical	NA	NA	NA	NA	NA	NA	NA	TRUE	NA	NA	NA	C	coding	538	1617	192	1808	133284	77436	FALSE	40	AATAATGACTGCAATCTCTA	NA	NA	NA	NA	AATAAA	-26_x000D_
PB.3228.4	LUXX01006283.1	-	2681	14	full-splice_match	ENSSSCG00025017599	ENSSSCT00025023853	6858	14	130	4047	130	-2298	multi-exon	FALSE	canonical	NA	NA	NA	NA	NA	NA	NA	TRUE	NA	NA	NA	C	coding	538	1617	201	1817	133284	77436	FALSE	75	AATAAAAAAGTTAAAAAACA	NA	NA	NA	NA	NA	NA_x000D_
PB.3228.5	LUXX01006283.1	-	2448	14	full-splice_match	ENSSSCG00025017599	ENSSSCT00025023853	6858	14	120	4290	120	-2541	multi-exon	FALSE	canonical	NA	NA	NA	NA	NA	NA	NA	TRUE	NA	NA	NA	C	coding	538	1617	211	1827	133284	77436	FALSE	25	ACCTTCAGCCTTCAGTGAAT	NA	NA	NA	NA	ATTAAA	-21_x000D_
PB.3229.1	LUXX01006283.1	-	3026	11	novel_in_catalog	ENSSSCG00025017599	novel	3542	13	NA	NA	-28	-5	intron_retention	TRUE	canonical	NA	NA	NA	NA	NA	NA	NA	TRUE	NA	NA	NA	C	coding	811	2436	165	2600	211419	177589	FALSE	40	AAAGTACGTTGCTCTGAAAA	NA	NA	NA	NA	AATAAA	-12_x000D_
PB.3230.1	LUXX01006283.1	+	2456	5	incomplete-splice_match	ENSSSCG00025017770	ENSSSCT00025024117	4033	6	-13	2557	10	-2555	3prime_fragment	FALSE	canonical	NA	NA	NA	NA	NA	NA	NA	TRUE	NA	NA	NA	A	coding	739	2220	19	2238	216720	225025	FALSE	15	GAAGTATTGTGCCCCGTTCT	NA	NA	NA	NA	GATAAA	-31_x000D_
PB.3231.1	LUXX01006283.1	+	4156	13	incomplete-splice_match	ENSSSCG00025018101	ENSSSCT00025024608	5469	16	-34	14039	-30	-14039	3prime_fragment	FALSE	canonical	NA	NA	NA	NA	NA	NA	NA	TRUE	NA	NA	NA	A	coding	1366	4098	59	4156	312535	354092	FALSE	70	AAAAAAAGAAAAGAATCTCA	NA	NA	NA	NA	NA	NA_x000D_
PB.3232.1	LUXX01006283.1	-	3233	8	novel_in_catalog	ENSSSCG00025018207	novel	1802	9	NA	NA	-1276	5	intron_retention	FALSE	canonical	NA	NA	NA	NA	NA	NA	NA	TRUE	NA	NA	NA	A	coding	489	1470	1406	2875	437060	372144	FALSE	30	AGCCATGCCATTCATTTACA	NA	NA	NA	NA	AATAAA	-16_x000D_
PB.3233.1	LUXX01006283.1	+	1818	17	full-splice_match	ENSSSCG00025018624	ENSSSCT00025025270	5124	17	72	3234	72	-3234	multi-exon	FALSE	canonical	NA	NA	NA	NA	NA	NA	NA	TRUE	NA	NA	NA	A	coding	520	1563	109	1671	779087	877224	FALSE	5	TTTGGTGGTGTGGGTTATCT	NA	NA	NA	NA	AATAAA	-14_x000D_
PB.3234.1	LUXX01006283.1	+	1840	7	novel_in_catalog	ENSSSCG00025018875	novel	3109	7	NA	NA	-2	-1304	combination_of_known_junctions	FALSE	canonical	NA	NA	NA	NA	NA	NA	NA	TRUE	NA	NA	NA	B	coding	307	924	66	989	936979	1001518	FALSE	75	AAATAAAAGATAACAACAAA	NA	NA	NA	NA	AAAAAG	-41_x000D_
PB.3234.2	LUXX01006283.1	+	3131	7	novel_in_catalog	ENSSSCG00025018875	novel	3109	7	NA	NA	0	-4	combination_of_known_junctions	FALSE	canonical	NA	NA	NA	NA	NA	NA	NA	TRUE	NA	NA	NA	B	coding	307	924	49	972	936979	1001518	FALSE	25	GAAATGCTTTCTTTCATTAT	NA	NA	NA	NA	TATAAA	-17_x000D_
PB.3234.3	LUXX01006283.1	+	1387	7	novel_in_catalog	ENSSSCG00025018875	novel	3109	7	NA	NA	0	-1740	combination_of_known_junctions	FALSE	canonical	NA	NA	NA	NA	NA	NA	NA	TRUE	NA	NA	NA	B	coding	307	924	49	972	936979	1001518	FALSE	45	AAAGTTTATGTGTAAAACAT	NA	NA	NA	NA	AATAAA	-21_x000D_
PB.3235.1	LUXX01006283.1	-	3751	6	novel_not_in_catalog	ENSSSCG00025019271	novel	3791	7	NA	NA	42	10	at_least_one_novel_splicesite	FALSE	non_canonical	NA	NA	NA	NA	NA	NA	NA	TRUE	NA	NA	NA	B	coding	120	363	26	388	1344080	1280416	TRUE	25	ACAGACTAGTGGGTCTAGTG	NA	NA	NA	NA	AATAAA	-30_x000D_
PB.3235.2	LUXX01006283.1	-	810	6	novel_not_in_catalog	ENSSSCG00025019271	novel	3791	7	NA	NA	60	-2913	at_least_one_novel_splicesite	FALSE	non_canonical	NA	NA	NA	NA	NA	NA	NA	TRUE	NA	NA	NA	B	coding	120	363	8	370	1344080	1280416	TRUE	80	AAAAAAAAAAAAAAAATGCT	NA	NA	NA	NA	NA	NA_x000D_
PB.3236.10	LUXX01006283.1	-	3842	1	novel_in_catalog	ENSSSCG00025007174	novel	6410	34	NA	NA	-93	-1084	mono-exon_by_intron_retention	FALSE	NA	NA	NA	NA	NA	NA	NA	NA	NA	NA	NA	NA	B	coding	49	150	237	386	1375144	1374995	NA	75	AAAATAAAAAAAAATTATTA	NA	NA	NA	NA	NA	NA_x000D_
PB.3236.5	LUXX01006283.1	-	6580	34	novel_not_in_catalog	ENSSSCG00025007174	novel	6412	35	NA	NA	-27	1	intron_retention	FALSE	non_canonical	NA	NA	NA	NA	NA	NA	NA	TRUE	NA	NA	NA	B	coding	1259	3780	2741	6520	1460421	1370514	FALSE	90	AAAAAGAAAAAGAAAAAAAA	NA	NA	NA	NA	NA	NA_x000D_
PB.3236.7	LUXX01006283.1	-	3734	19	novel_not_in_catalog	ENSSSCG00025007174	novel	6257	33	NA	NA	-77686	1	at_least_one_novel_splicesite	FALSE	canonical	NA	NA	NA	NA	NA	NA	NA	TRUE	NA	NA	NA	B	coding	1078	3237	438	3674	1451531	1370514	FALSE	90	AAAAAGAAAAAGAAAAAAAA	NA	NA	NA	NA	NA	NA_x000D_
PB.3237.1	LUXX01006283.1	+	2950	18	novel_not_in_catalog	ENSSSCG00025007682	novel	11520	58	NA	NA	-107992	-40437	at_least_one_novel_splicesite	FALSE	canonical	NA	NA	NA	NA	NA	NA	NA	TRUE	NA	NA	NA	A	coding	654	1965	466	2430	2375209	2479478	FALSE	40	AATGAGGTGAAAGACTAGTT	NA	NA	NA	NA	AATAAA	-22_x000D_
PB.3237.2	LUXX01006283.1	+	3544	1	intergenic	novelGene_256	novel	NA	NA	NA	NA	NA	NA	mono-exon	FALSE	NA	NA	NA	NA	NA	NA	NA	NA	NA	NA	NA	NA	A	non_coding	NA	NA	NA	NA	NA	NA	NA	85	TAAAAAGCAAAAAAAAAAAA	NA	NA	NA	NA	NA	NA_x000D_
PB.3238.1	LUXX01006283.1	+	4036	6	incomplete-splice_match	ENSSSCG00025007802	ENSSSCT00025010369	3883	7	-33	-6	-33	6	intron_retention	FALSE	canonical	NA	NA	NA	NA	NA	NA	NA	TRUE	NA	NA	NA	B	coding	480	1443	70	1512	2528834	2565124	FALSE	30	AATCTGACTATACTGTCATC	NA	NA	NA	NA	AATAAA	-20_x000D_
PB.3238.2	LUXX01006283.1	+	2904	6	incomplete-splice_match	ENSSSCG00025007802	ENSSSCT00025010369	3883	7	-2	1095	-2	-1095	intron_retention	FALSE	canonical	NA	NA	NA	NA	NA	NA	NA	TRUE	NA	NA	NA	B	coding	480	1443	39	1481	2528834	2565124	FALSE	20	TCTTGGTTATCCTCAAAGTC	NA	NA	NA	NA	AATAAA	-15_x000D_
PB.3238.3	LUXX01006283.1	+	1676	6	incomplete-splice_match	ENSSSCG00025007802	ENSSSCT00025010369	3883	7	-2	2323	-2	-2323	intron_retention	FALSE	canonical	NA	NA	NA	NA	NA	NA	NA	TRUE	NA	NA	NA	B	coding	480	1443	39	1481	2528834	2565124	FALSE	20	CTTTTGTTGAGATTGATATT	NA	NA	NA	NA	NA	NA_x000D_
PB.3238.4	LUXX01006283.1	+	1562	6	incomplete-splice_match	ENSSSCG00025007802	ENSSSCT00025010369	3883	7	0	2435	0	-2435	intron_retention	FALSE	canonical	NA	NA	NA	NA	NA	NA	NA	TRUE	NA	NA	NA	B	coding	480	1443	37	1479	2528834	2565124	FALSE	20	AATACTGCTTGGATTCTTCC	NA	NA	NA	NA	NA	NA_x000D_
PB.3239.2	LUXX01006283.1	-	2903	15	novel_in_catalog	ENSSSCG00025007912	novel	2989	15	NA	NA	291	0	combination_of_known_junctions	FALSE	canonical	NA	NA	NA	NA	NA	NA	NA	TRUE	NA	NA	NA	B	coding	800	2403	34	2436	2712526	2592559	FALSE	45	AAAACCAAAAGATGTGTTTG	NA	NA	NA	NA	AGTAAA	-5_x000D_
PB.3239.3	LUXX01006283.1	-	2847	15	novel_not_in_catalog	ENSSSCG00025007912	novel	2989	15	NA	NA	-87	0	at_least_one_novel_splicesite	FALSE	non_canonical	NA	NA	NA	NA	NA	NA	NA	TRUE	NA	NA	NA	B	coding	692	2079	302	2380	2690818	2592559	FALSE	45	AAAACCAAAAGATGTGTTTG	NA	NA	NA	NA	AGTAAA	-5_x000D_
PB.6136.1	LUXX01006555.1	-	1760	9	novel_in_catalog	ENSSSCG00025009251	novel	1864	11	NA	NA	8	2	combination_of_known_splicesites	FALSE	canonical	NA	NA	NA	NA	NA	NA	NA	TRUE	NA	NA	NA	A	coding	330	993	65	1057	717456	698322	FALSE	25	AAGAATGATCTGCTTTTGTT	NA	NA	NA	NA	AATAAA	-15_x000D_
PB.7538.1	LUXX01006697.1	+	3371	2	antisense	novelGene_ENSSSCG00025010032_AS	novel	NA	NA	NA	NA	NA	NA	multi-exon	FALSE	canonical	NA	NA	NA	NA	NA	NA	NA	FALSE	NA	NA	NA	A	coding	431	1296	1388	2683	21432	22727	FALSE	20	AAGACCGCTTCTCGTGAGTG	NA	NA	NA	NA	AATAAA	-22_x000D_
PB.7491.1	LUXX01006807.1	-	1231	3	incomplete-splice_match	ENSSSCG00025010705	ENSSSCT00025014063	3351	15	8561	-62	8561	62	5prime_fragment	FALSE	canonical	NA	NA	NA	NA	NA	NA	NA	TRUE	NA	NA	NA	A	coding	108	327	28	354	64546	62223	FALSE	0	TTTTTTTCCTGGTCTTTTTT	NA	NA	NA	NA	NA	NA_x000D_
PB.7492.1	LUXX01006807.1	+	958	4	novel_in_catalog	ENSSSCG00025010965	novel	1047	5	NA	NA	-9	-2	combination_of_known_junctions	FALSE	canonical	NA	NA	NA	NA	NA	NA	NA	TRUE	NA	NA	NA	B	coding	292	879	48	926	88148	95713	FALSE	25	AGAAAACTGTCGCTTGGGCC	NA	NA	NA	NA	AATAAA	-13_x000D_
PB.7492.2	LUXX01006807.1	+	723	3	novel_in_catalog	ENSSSCG00025010965	novel	3212	4	NA	NA	-6	0	combination_of_known_splicesites	FALSE	canonical	NA	NA	NA	NA	NA	NA	NA	TRUE	NA	NA	NA	B	coding	214	645	45	689	88148	95713	FALSE	20	AAAACTGTCGCTTGGGCCTC	NA	NA	NA	NA	AATAAA	-15_x000D_
PB.4878.1	LUXX01006860.1	-	3545	7	incomplete-splice_match	ENSSSCG00025005380	ENSSSCT00025007251	4699	8	24	1193	24	-1193	intron_retention	FALSE	canonical	NA	NA	NA	NA	NA	NA	NA	TRUE	NA	NA	NA	A	coding	711	2136	1011	3146	605784	594646	FALSE	75	AAACACAAAATTAAAAGAAA	NA	NA	NA	NA	NA	NA_x000D_
PB.447.1	LUXX01006980.1	-	4156	8	incomplete-splice_match	ENSSSCG00025006119	ENSSSCT00025008143	4074	9	-44	-1	-44	1	intron_retention	FALSE	canonical	NA	NA	NA	NA	NA	NA	NA	TRUE	NA	NA	NA	B	coding	413	1242	185	1426	1017252	1007170	FALSE	15	ATGCTTTGAGTTGCTAGTTT	NA	NA	NA	NA	AATAAA	-13_x000D_
PB.447.2	LUXX01006980.1	-	2285	8	incomplete-splice_match	ENSSSCG00025006119	ENSSSCT00025008143	4074	9	-10	1836	-10	-1836	intron_retention	FALSE	canonical	NA	NA	NA	NA	NA	NA	NA	TRUE	NA	NA	NA	B	coding	413	1242	151	1392	1017252	1007170	FALSE	90	AAAAAAAAAAAAAATAAAGA	NA	NA	NA	NA	NA	NA_x000D_
PB.447.3	LUXX01006980.1	-	3799	2	genic	ENSSSCG00025006119	novel	4074	9	NA	NA	-25	-8980	multi-exon	FALSE	non_canonical	NA	NA	NA	NA	NA	NA	NA	FALSE	NA	NA	NA	B	coding	159	480	166	645	1017252	1016773	TRUE	95	GAAAAAAAAAAAAAAAAAAA	NA	NA	NA	NA	NA	NA_x000D_
PB.448.1	LUXX01006980.1	+	3167	3	incomplete-splice_match	ENSSSCG00025000575	ENSSSCT00025000686	3445	5	20024	14	20024	1	5prime_fragment	FALSE	canonical	NA	NA	NA	NA	NA	NA	NA	TRUE	NA	NA	NA	A	coding	435	1308	164	1471	5292248	5317775	FALSE	15	TATTTTCTTTTGGACTACGT	NA	NA	NA	NA	AGTAAA	-23_x000D_
PB.449.1	LUXX01006980.1	+	2300	1	intergenic	novelGene_23	novel	NA	NA	NA	NA	NA	NA	mono-exon	FALSE	NA	NA	NA	NA	NA	NA	NA	NA	NA	NA	NA	NA	A	non_coding	NA	NA	NA	NA	NA	NA	NA	100	AAAAAAAAAAAAAAAAAAAA	NA	NA	NA	NA	AAAAAG	-3_x000D_
PB.450.1	LUXX01006980.1	+	2358	1	intergenic	novelGene_24	novel	NA	NA	NA	NA	NA	NA	mono-exon	FALSE	NA	NA	NA	NA	NA	NA	NA	NA	NA	NA	NA	NA	A	non_coding	NA	NA	NA	NA	NA	NA	NA	100	AAAAAAAAAAAAAAAAAAAA	NA	NA	NA	NA	AAAACA	-14_x000D_
PB.450.2	LUXX01006980.1	+	1142	1	intergenic	novelGene_25	novel	NA	NA	NA	NA	NA	NA	mono-exon	FALSE	NA	NA	NA	NA	NA	NA	NA	NA	NA	NA	NA	NA	A	non_coding	NA	NA	NA	NA	NA	NA	NA	100	AAAAAAAAAAAAAAAAAAAA	NA	NA	NA	NA	AAAACA	-14_x000D_
PB.451.1	LUXX01006980.1	+	2208	1	antisense	novelGene_ENSSSCG00025001463_AS	novel	NA	NA	NA	NA	NA	NA	mono-exon	FALSE	NA	NA	NA	NA	NA	NA	NA	NA	NA	NA	NA	NA	A	non_coding	NA	NA	NA	NA	NA	NA	NA	100	AAAAAAAAAAAAAAAAAAAA	NA	NA	NA	NA	NA	NA_x000D_
PB.452.1	LUXX01006980.1	-	4623	32	novel_in_catalog	ENSSSCG00025001463	novel	6569	40	NA	NA	0	-18624	combination_of_known_junctions	FALSE	canonical	NA	NA	NA	NA	NA	NA	NA	TRUE	NA	NA	NA	B	coding	1351	4053	570	4622	5457624	5359806	FALSE	65	TGAAAAAGAAACAGAAGAAG	NA	NA	NA	NA	NA	NA_x000D_
PB.452.2	LUXX01006980.1	-	4739	2	incomplete-splice_match	ENSSSCG00025001463	ENSSSCT00025002903	6364	20	0	67572	0	1304	3prime_fragment	FALSE	canonical	NA	NA	NA	NA	NA	NA	NA	TRUE	NA	NA	NA	B	non_coding	NA	NA	NA	NA	NA	NA	NA	90	AAAAAAAAAAAAAAAACAAC	NA	NA	NA	NA	NA	NA_x000D_
PB.7422.1	LUXX01006988.1	-	1783	10	incomplete-splice_match	ENSSSCG00025003047	ENSSSCT00025004025	4080	11	9	2906	9	-2906	3prime_fragment	TRUE	canonical	NA	NA	NA	NA	NA	NA	NA	TRUE	NA	NA	NA	A	coding	464	1395	83	1477	100263	82013	FALSE	25	AAATGTCATTACCTGGCTTT	NA	NA	NA	NA	AATAAA	-17_x000D_
PB.6268.1	LUXX01007159.1	-	5441	16	incomplete-splice_match	ENSSSCG00025003536	ENSSSCT00025004760	6455	17	1103	-6	1103	6	5prime_fragment	FALSE	canonical	NA	NA	NA	NA	NA	NA	NA	TRUE	NA	NA	NA	B	coding	999	3000	62	3061	540731	216460	FALSE	75	AAAAAAAAAAAAAAGCATTT	NA	NA	NA	NA	NA	NA_x000D_
PB.6268.2	LUXX01007159.1	-	3425	16	incomplete-splice_match	ENSSSCG00025003536	ENSSSCT00025004760	6455	17	1140	1973	1140	-1973	5prime_fragment	FALSE	canonical	NA	NA	NA	NA	NA	NA	NA	TRUE	NA	NA	NA	B	coding	999	3000	25	3024	540731	216460	FALSE	75	AAAAAAATAGAGGAAAACAA	NA	NA	NA	NA	CATAAA	-3_x000D_
PB.6684.1	LUXX01007169.1	+	2885	1	incomplete-splice_match	ENSSSCG00025006764	ENSSSCT00025008959	3117	2	27359	23	1239	17	mono-exon	FALSE	NA	NA	NA	NA	NA	NA	NA	NA	NA	NA	NA	NA	B	non_coding	NA	NA	NA	NA	NA	NA	NA	100	AAAAAAAAAAAAAAAAAAAA	NA	NA	NA	NA	NA	NA_x000D_
PB.6684.2	LUXX01007169.1	+	1756	1	genic	ENSSSCG00025006764_ENSSSCG00025006816	novel	NA	NA	NA	NA	2551	160	mono-exon	FALSE	NA	NA	NA	NA	NA	NA	NA	NA	NA	NA	NA	NA	A	non_coding	NA	NA	NA	NA	NA	NA	NA	40	AAAAAAGATTTGGGGTCATT	NA	NA	NA	NA	NA	NA_x000D_
PB.6684.3	LUXX01007169.1	+	1538	1	incomplete-splice_match	ENSSSCG00025006764	ENSSSCT00025008959	3117	2	28705	24	2585	16	mono-exon	FALSE	NA	NA	NA	NA	NA	NA	NA	NA	NA	NA	NA	NA	B	non_coding	NA	NA	NA	NA	NA	NA	NA	95	TAAAAAAAAAAAAAAAAAAA	NA	NA	NA	NA	NA	NA_x000D_
PB.6685.1	LUXX01007169.1	-	2459	1	antisense	novelGene_ENSSSCG00025006845_AS	novel	NA	NA	NA	NA	NA	NA	mono-exon	FALSE	NA	NA	NA	NA	NA	NA	NA	NA	NA	NA	NA	NA	B	non_coding	NA	NA	NA	NA	NA	NA	NA	100	AAAAAAAAAAAAAAAAAAAA	NA	NA	NA	NA	NA	NA_x000D_
PB.6685.2	LUXX01007169.1	-	1395	1	antisense	novelGene_ENSSSCG00025006845_AS	novel	NA	NA	NA	NA	NA	NA	mono-exon	FALSE	NA	NA	NA	NA	NA	NA	NA	NA	NA	NA	NA	NA	B	non_coding	NA	NA	NA	NA	NA	NA	NA	100	AAAAAAAAAAAAAAAAAAAA	NA	NA	NA	NA	NA	NA_x000D_
PB.6686.1	LUXX01007169.1	+	3206	24	incomplete-splice_match	ENSSSCG00025007137	ENSSSCT00025009564	2889	25	-55	342	-30	7	3prime_fragment	TRUE	canonical	NA	NA	NA	NA	NA	NA	NA	TRUE	NA	NA	NA	B	coding	871	2616	100	2715	577054	697311	FALSE	30	AATACTCTTGTTTTAACTGA	NA	NA	NA	NA	AATAAA	-29_x000D_
PB.6686.2	LUXX01007169.1	+	2817	24	incomplete-splice_match	ENSSSCG00025007137	ENSSSCT00025009564	2889	25	-11	687	10	-287	3prime_fragment	FALSE	canonical	NA	NA	NA	NA	NA	NA	NA	TRUE	NA	NA	NA	B	coding	871	2616	56	2671	577054	697311	FALSE	25	AAGCATATCTGTCCTTGAGC	NA	NA	NA	NA	ATTAAA	-25_x000D_
PB.6687.1	LUXX01007169.1	-	1370	1	antisense	novelGene_ENSSSCG00025007137_AS	novel	NA	NA	NA	NA	NA	NA	mono-exon	FALSE	NA	NA	NA	NA	NA	NA	NA	NA	NA	NA	NA	NA	A	non_coding	NA	NA	NA	NA	NA	NA	NA	20	AACTGCAGTGTGTGTGCTTA	NA	NA	NA	NA	AATAAA	-15_x000D_
PB.6687.2	LUXX01007169.1	-	2365	12	novel_not_in_catalog	ENSSSCG00025007295	novel	6592	13	NA	NA	-3	37152	at_least_one_novel_splicesite	TRUE	canonical	NA	NA	NA	NA	NA	NA	NA	TRUE	NA	NA	NA	B	coding	298	897	239	1135	711592	657541	FALSE	15	TAACTGCAGTGTGTGTGCTT	NA	NA	NA	NA	AATAAA	-14_x000D_
PB.6687.4	LUXX01007169.1	-	2453	12	incomplete-splice_match	ENSSSCG00025007295	ENSSSCT00025009720	6592	13	-3	4236	-3	0	3prime_fragment	FALSE	canonical	NA	NA	NA	NA	NA	NA	NA	TRUE	NA	NA	NA	B	coding	335	1008	239	1246	711592	698906	FALSE	25	AAAAGTGGACTCTGGCTCCC	NA	NA	NA	NA	AATAAA	-14_x000D_
PB.6687.5	LUXX01007169.1	-	1940	12	incomplete-splice_match	ENSSSCG00025007295	ENSSSCT00025009720	6592	13	-3	4749	-3	-513	3prime_fragment	FALSE	canonical	NA	NA	NA	NA	NA	NA	NA	TRUE	NA	NA	NA	B	coding	335	1008	239	1246	711592	698906	FALSE	50	GAACTAAATCCAAACTAATT	NA	NA	NA	NA	AATAAA	-3_x000D_
PB.6687.6	LUXX01007169.1	-	1838	12	incomplete-splice_match	ENSSSCG00025007295	ENSSSCT00025009720	6592	13	-3	4851	-3	-615	3prime_fragment	FALSE	canonical	NA	NA	NA	NA	NA	NA	NA	TRUE	NA	NA	NA	B	coding	335	1008	239	1246	711592	698906	FALSE	30	ATGTATGATATATGTGTATT	NA	NA	NA	NA	NA	NA_x000D_
PB.6451.1	LUXX01007230.1	-	5693	20	novel_not_in_catalog	ENSSSCG00025007648	novel	6524	22	NA	NA	-772	-1	at_least_one_novel_splicesite	FALSE	canonical	NA	NA	NA	NA	NA	NA	NA	TRUE	NA	NA	NA	B	coding	1403	4212	202	4413	237958	84724	FALSE	30	AGTTAACATGTCCACTTTTA	NA	NA	NA	NA	AATAAA	-18_x000D_
PB.6451.2	LUXX01007230.1	-	5088	20	novel_not_in_catalog	ENSSSCG00025007648	novel	6524	22	NA	NA	-778	-586	at_least_one_novel_splicesite	FALSE	canonical	NA	NA	NA	NA	NA	NA	NA	TRUE	NA	NA	NA	B	coding	1403	4212	189	4400	237958	84724	FALSE	50	AAAATAATTTTAAAGAGTTT	NA	NA	NA	NA	AATAAA	-35_x000D_
PB.5873.1	LUXX01007252.1	-	1602	2	incomplete-splice_match	ENSSSCG00025008095	ENSSSCT00025010777	4701	7	3	71363	3	-71363	3prime_fragment	FALSE	canonical	NA	NA	NA	NA	NA	NA	NA	TRUE	NA	NA	NA	A	coding	255	768	18	785	145394	142797	FALSE	60	AAAGACAGCAATATAAGCAA	NA	NA	NA	NA	AATAAA	-19_x000D_
PB.5874.1	LUXX01007252.1	+	3572	5	novel_in_catalog	ENSSSCG00025008133	novel	4088	6	NA	NA	2	-419	combination_of_known_junctions	FALSE	canonical	NA	NA	NA	NA	NA	NA	NA	TRUE	NA	NA	NA	B	coding	541	1626	77	1702	152120	168517	FALSE	35	TAAACTGAAAAGTCTGTCGT	NA	NA	NA	NA	ATTAAA	-17_x000D_
PB.5874.2	LUXX01007252.1	+	3983	5	novel_in_catalog	ENSSSCG00025008133	novel	4119	6	NA	NA	11	0	combination_of_known_junctions	FALSE	canonical	NA	NA	NA	NA	NA	NA	NA	TRUE	NA	NA	NA	B	coding	541	1626	68	1693	152120	168517	FALSE	40	CAATTTTGTGCAACAAACAC	NA	NA	NA	NA	AATAAA	-19_x000D_
PB.5875.2	LUXX01007252.1	-	3770	22	novel_in_catalog	ENSSSCG00025008616	novel	6408	23	NA	NA	8604	1	combination_of_known_junctions	FALSE	canonical	NA	NA	NA	NA	NA	NA	NA	TRUE	NA	NA	NA	B	coding	1142	3429	49	3477	710040	590215	FALSE	70	TAAAAAAAAAGAGAGAGAGA	NA	NA	NA	NA	NA	NA_x000D_
PB.5875.3	LUXX01007252.1	-	2281	6	novel_in_catalog	ENSSSCG00025008616	novel	5153	23	NA	NA	-22	-70351	intron_retention	FALSE	canonical	NA	NA	NA	NA	NA	NA	NA	TRUE	NA	NA	NA	B	coding	205	618	37	654	718948	661901	FALSE	90	AAAAAGAAAAAAAAAAAACA	NA	NA	NA	NA	AAGAAA	-44_x000D_
PB.5876.1	LUXX01007252.1	+	3000	1	incomplete-splice_match	ENSSSCG00025009220	ENSSSCT00025012214	8085	21	133580	2	133486	2	mono-exon	FALSE	NA	NA	NA	NA	NA	NA	NA	NA	NA	NA	NA	NA	A	coding	107	324	271	594	991849	992172	NA	20	AAGCCTAAGCGCCTGCTGCC	NA	NA	NA	NA	AATAAA	-19_x000D_
PB.4697.1	LUXX01007272.1	+	928	8	incomplete-splice_match	ENSSSCG00025005721	ENSSSCT00025007654	3143	12	203	6562	203	-6562	3prime_fragment	FALSE	canonical	NA	NA	NA	NA	NA	NA	NA	TRUE	NA	NA	NA	A	coding	258	777	69	845	199007	208921	FALSE	70	TAAGAAAAAAAAAATTCCAA	NA	NA	NA	NA	AATAAA	-19_x000D_
PB.4698.1	LUXX01007272.1	-	1725	1	incomplete-splice_match	ENSSSCG00025005756	ENSSSCT00025007686	6747	7	17613	3715	17515	2	mono-exon	FALSE	NA	NA	NA	NA	NA	NA	NA	NA	NA	NA	NA	NA	A	coding	126	381	1169	1549	211212	210832	NA	35	AGAAGGAGGAAGCGCCTATG	NA	NA	NA	NA	AATAAA	-13_x000D_
PB.4699.1	LUXX01007272.1	-	587	5	novel_in_catalog	ENSSSCG00025005824	novel	536	6	NA	NA	-5	1	intron_retention	FALSE	canonical	NA	NA	NA	NA	NA	NA	NA	TRUE	NA	NA	NA	A	coding	136	411	76	486	240963	239003	FALSE	15	AAACCCGTCTGCCTGCGCCT	NA	NA	NA	NA	ATTAAA	-15_x000D_
PB.4700.1	LUXX01007272.1	-	2270	13	novel_in_catalog	ENSSSCG00025005883	novel	2291	13	NA	NA	0	-23	combination_of_known_junctions	TRUE	canonical	NA	NA	NA	NA	NA	NA	NA	TRUE	NA	NA	NA	A	coding	448	1347	51	1397	293312	272824	FALSE	45	AAAATAAACCTTGAGTTTAT	NA	NA	NA	NA	AATAAA	-36_x000D_
PB.4701.1	LUXX01007272.1	-	2126	7	novel_not_in_catalog	ENSSSCG00025006454	novel	2265	8	NA	NA	-20	2	at_least_one_novel_splicesite	FALSE	canonical	NA	NA	NA	NA	NA	NA	NA	TRUE	NA	NA	NA	A	coding	264	795	107	901	998341	993107	FALSE	25	AAGACTGTTGTTGCAATTGG	NA	NA	NA	NA	AATAAA	-13_x000D_
PB.4702.1	LUXX01007272.1	+	2147	5	full-splice_match	ENSSSCG00025006543	ENSSSCT00025008646	2210	5	59	4	-20	2	multi-exon	FALSE	canonical	NA	NA	NA	NA	NA	NA	NA	TRUE	NA	NA	NA	A	coding	185	558	227	784	1024575	1028851	FALSE	15	AATCCTTGATTTTTGTCTTG	NA	NA	NA	NA	AATAAA	-14_x000D_
PB.4703.1	LUXX01007272.1	-	4743	6	novel_in_catalog	ENSSSCG00025006623	novel	4670	6	NA	NA	-4	5	combination_of_known_junctions	FALSE	canonical	NA	NA	NA	NA	NA	NA	NA	TRUE	NA	NA	NA	B	coding	777	2334	628	2961	1047104	1038723	FALSE	25	AAGTGCAATTTTTCCCTATT	NA	NA	NA	NA	AATAAA	-28_x000D_
PB.4703.2	LUXX01007272.1	-	4436	5	novel_not_in_catalog	ENSSSCG00025006623	novel	4670	6	NA	NA	-59	5	at_least_one_novel_splicesite	FALSE	non_canonical	NA	NA	NA	NA	NA	NA	NA	TRUE	NA	NA	NA	B	coding	456	1371	1284	2654	1040839	1038723	FALSE	25	AAGTGCAATTTTTCCCTATT	NA	NA	NA	NA	AATAAA	-28_x000D_
PB.4703.3	LUXX01007272.1	-	4404	5	novel_not_in_catalog	ENSSSCG00025006623	novel	5748	5	NA	NA	4	5	at_least_one_novel_splicesite	FALSE	non_canonical	NA	NA	NA	NA	NA	NA	NA	TRUE	NA	NA	NA	B	coding	456	1371	1252	2622	1040839	1038723	FALSE	25	AAGTGCAATTTTTCCCTATT	NA	NA	NA	NA	AATAAA	-28_x000D_
PB.4703.5	LUXX01007272.1	-	2361	1	incomplete-splice_match	ENSSSCG00025006623	ENSSSCT00025008761	5748	5	9901	1105	4304	-1	mono-exon	FALSE	NA	NA	NA	NA	NA	NA	NA	NA	NA	NA	NA	NA	B	coding	194	585	1	585	1039307	1038723	NA	25	ATTCTCAAGTGCAATTTTTC	NA	NA	NA	NA	AATAAA	-22_x000D_
PB.4704.1	LUXX01007272.1	-	1464	7	full-splice_match	ENSSSCG00025006838	ENSSSCT00025009113	3316	7	5	1847	5	-1847	multi-exon	FALSE	canonical	NA	NA	NA	NA	NA	NA	NA	TRUE	NA	NA	NA	A	coding	261	786	82	867	1159211	1153076	FALSE	80	AAAAAAAAAAAAAAAATTGT	NA	NA	NA	NA	AAAACA	-13_x000D_
PB.4705.1	LUXX01007272.1	-	3025	7	incomplete-splice_match	ENSSSCG00025006933	ENSSSCT00025009219	3183	8	1670	7	1653	1	5prime_fragment	FALSE	canonical	NA	NA	NA	NA	NA	NA	NA	TRUE	NA	NA	NA	A	coding	606	1821	35	1855	1180997	1167113	FALSE	20	GCAACTTGGCAGCGCAGCTT	NA	NA	NA	NA	AATAAA	-24_x000D_
PB.4706.1	LUXX01007272.1	+	1525	5	novel_in_catalog	ENSSSCG00025007104	novel	1640	6	NA	NA	5	-2	combination_of_known_splicesites	TRUE	canonical	NA	NA	NA	NA	NA	NA	NA	TRUE	NA	NA	NA	A	coding	262	789	20	808	1267911	1273796	FALSE	10	TACTCATTGTGTTTTGCTGT	NA	NA	NA	NA	GATAAA	-14_x000D_
PB.4707.1	LUXX01007272.1	+	3671	23	incomplete-splice_match	ENSSSCG00025007173	ENSSSCT00025009551	7452	27	8693	-803	8693	803	5prime_fragment	FALSE	canonical	NA	NA	NA	NA	NA	NA	NA	TRUE	NA	NA	NA	A	coding	837	2514	219	2732	1278157	1291114	FALSE	5	GGCCTGTGACCTTTTGTTTT	NA	NA	NA	NA	AATAAA	-17_x000D_
PB.4708.1	LUXX01007272.1	-	4720	22	incomplete-splice_match	ENSSSCG00025007321	ENSSSCT00025009749	5669	23	-67	1323	-67	-1323	3prime_fragment	FALSE	canonical	NA	NA	NA	NA	NA	NA	NA	TRUE	NA	NA	NA	B	coding	876	2631	358	2988	1436869	1410819	FALSE	70	AAAAAAAAAAAAAATGGGCT	NA	NA	NA	NA	ATTAAA	-45_x000D_
PB.4708.3	LUXX01007272.1	-	4133	22	incomplete-splice_match	ENSSSCG00025007321	ENSSSCT00025009749	5669	23	-8	1851	-8	-1851	3prime_fragment	FALSE	canonical	NA	NA	NA	NA	NA	NA	NA	TRUE	NA	NA	NA	B	coding	876	2631	299	2929	1436869	1410819	FALSE	0	CTTGGCCTTCTGTTCTCTTT	NA	NA	NA	NA	GATAAA	-44_x000D_
PB.4708.4	LUXX01007272.1	-	3873	22	incomplete-splice_match	ENSSSCG00025007321	ENSSSCT00025009749	5669	23	-1	2104	-1	-2104	3prime_fragment	FALSE	canonical	NA	NA	NA	NA	NA	NA	NA	TRUE	NA	NA	NA	B	coding	876	2631	292	2922	1436869	1410819	FALSE	90	AAAAAAAACAAAAAACAAAA	NA	NA	NA	NA	AATAAA	-14_x000D_
PB.4708.5	LUXX01007272.1	-	3614	22	incomplete-splice_match	ENSSSCG00025007321	ENSSSCT00025009749	5669	23	-1	2363	-1	-2363	3prime_fragment	FALSE	canonical	NA	NA	NA	NA	NA	NA	NA	TRUE	NA	NA	NA	B	coding	876	2631	292	2922	1436869	1410819	FALSE	70	AAGGAAAAAAAAGGAAAGAC	NA	NA	NA	NA	CATAAA	-42_x000D_
PB.4708.6	LUXX01007272.1	-	3218	22	incomplete-splice_match	ENSSSCG00025007321	ENSSSCT00025009749	5669	23	-22	2780	-22	-2780	3prime_fragment	FALSE	canonical	NA	NA	NA	NA	NA	NA	NA	TRUE	NA	NA	NA	B	coding	876	2631	313	2943	1436869	1410819	FALSE	80	AAAAAAAAAAAAAGAAAGCT	NA	NA	NA	NA	NA	NA_x000D_
PB.4709.1	LUXX01007272.1	-	4213	23	full-splice_match	ENSSSCG00025007508	ENSSSCT00025010061	4350	23	134	3	37	-3	multi-exon	FALSE	canonical	NA	NA	NA	NA	NA	NA	NA	TRUE	NA	NA	NA	C	coding	875	2628	237	2864	1548999	1462417	FALSE	35	AAAACTGATGTCCTGATTTA	NA	NA	NA	NA	AATAAA	-12_x000D_
PB.4709.4	LUXX01007272.1	-	3160	23	full-splice_match	ENSSSCG00025007508	ENSSSCT00025010061	4350	23	97	1093	0	-1093	multi-exon	FALSE	canonical	NA	NA	NA	NA	NA	NA	NA	TRUE	NA	NA	NA	C	coding	875	2628	274	2901	1548999	1462417	FALSE	25	GAAACTTCCTGAAGCCTTGT	NA	NA	NA	NA	AATAAA	-21_x000D_
PB.4710.1	LUXX01007272.1	+	1345	8	full-splice_match	ENSSSCG00025007655	ENSSSCT00025010171	1627	8	45	237	12	-3	multi-exon	TRUE	canonical	NA	NA	NA	NA	NA	NA	NA	TRUE	NA	NA	NA	A	coding	312	939	22	960	1587673	1601278	FALSE	30	AAATTGTGATAAGTCCTGTG	NA	NA	NA	NA	AATAAA	-20_x000D_
PB.4711.1	LUXX01007272.1	+	4031	1	incomplete-splice_match	ENSSSCG00025007722	ENSSSCT00025010264	6081	10	30381	23	30381	-23	mono-exon	FALSE	NA	NA	NA	NA	NA	NA	NA	NA	NA	NA	NA	NA	A	coding	21	66	369	434	1661386	1661451	NA	85	TAAAAAAGAAAAAAAGAAAA	NA	NA	NA	NA	AGTAAA	-12_x000D_
PB.3652.1	LUXX01007331.1	-	1766	10	incomplete-splice_match	ENSSSCG00025009862	ENSSSCT00025013005	2875	12	776	809	776	-809	internal_fragment	FALSE	canonical	NA	NA	NA	NA	NA	NA	NA	TRUE	NA	NA	NA	B	coding	578	1734	33	1766	294727	274897	FALSE	70	AAAAAGAAACATCAAAAGCA	NA	NA	NA	NA	AAAACA	-43_x000D_
PB.3652.2	LUXX01007331.1	-	685	2	incomplete-splice_match	ENSSSCG00025009862	ENSSSCT00025013005	2875	12	778	17401	778	-17401	internal_fragment	FALSE	canonical	NA	NA	NA	NA	NA	NA	NA	TRUE	NA	NA	NA	B	coding	218	654	31	684	294727	291490	FALSE	70	AAAACATAGAAAAAGAAGAG	NA	NA	NA	NA	GATAAA	-35_x000D_
PB.3653.1	LUXX01007331.1	+	838	3	full-splice_match	ENSSSCG00025009926	ENSSSCT00025013079	1011	3	190	-17	190	17	multi-exon	FALSE	canonical	NA	NA	NA	NA	NA	NA	NA	TRUE	NA	NA	NA	A	coding	176	531	23	553	295218	323610	FALSE	20	ATACAGTGTGTTAGCTCCGT	NA	NA	NA	NA	AATAAA	-30_x000D_
PB.3654.1	LUXX01007331.1	+	1787	1	intergenic	novelGene_290	novel	NA	NA	NA	NA	NA	NA	mono-exon	FALSE	NA	NA	NA	NA	NA	NA	NA	NA	NA	NA	NA	NA	A	non_coding	NA	NA	NA	NA	NA	NA	NA	100	AAAAAAAAAAAAAAAAAAAA	NA	NA	NA	NA	NA	NA_x000D_
PB.3655.1	LUXX01007331.1	+	1852	1	intergenic	novelGene_291	novel	NA	NA	NA	NA	NA	NA	mono-exon	FALSE	NA	NA	NA	NA	NA	NA	NA	NA	NA	NA	NA	NA	A	non_coding	NA	NA	NA	NA	NA	NA	NA	90	AAAAAGACAAAAAAAAAAAA	NA	NA	NA	NA	AAGAAA	-5_x000D_
PB.3656.1	LUXX01007331.1	-	6575	27	novel_in_catalog	ENSSSCG00025000930	novel	7072	29	NA	NA	358	1	combination_of_known_junctions	TRUE	canonical	NA	NA	NA	NA	NA	NA	NA	TRUE	NA	NA	NA	B	coding	1689	5070	85	5154	1358173	1230974	FALSE	35	AAAATAAAGTGCTGGCTTGG	NA	NA	NA	NA	AATAAA	-8_x000D_
PB.3656.2	LUXX01007331.1	-	6540	27	novel_in_catalog	ENSSSCG00025000930	novel	7072	29	NA	NA	354	1	combination_of_known_junctions	FALSE	canonical	NA	NA	NA	NA	NA	NA	NA	TRUE	NA	NA	NA	B	coding	1676	5031	89	5119	1358173	1230974	FALSE	35	AAAATAAAGTGCTGGCTTGG	NA	NA	NA	NA	AATAAA	-8_x000D_
PB.3656.3	LUXX01007331.1	-	6510	27	novel_not_in_catalog	ENSSSCG00025000930	novel	7072	29	NA	NA	363	1	at_least_one_novel_splicesite	FALSE	canonical	NA	NA	NA	NA	NA	NA	NA	TRUE	NA	NA	NA	B	coding	1669	5010	80	5089	1358173	1230974	FALSE	35	AAAATAAAGTGCTGGCTTGG	NA	NA	NA	NA	AATAAA	-8_x000D_
PB.3657.1	LUXX01007331.1	+	940	6	full-splice_match	ENSSSCG00025001608	ENSSSCT00025002045	1353	6	-10	423	-10	0	multi-exon	FALSE	canonical	NA	NA	NA	NA	NA	NA	NA	TRUE	NA	NA	NA	C	coding	252	759	28	786	1659127	1670891	FALSE	10	GTTTGTCTGGAATTTGTTTT	NA	NA	NA	NA	AATAAA	-15_x000D_
PB.3657.2	LUXX01007331.1	+	2825	5	incomplete-splice_match	ENSSSCG00025001608	ENSSSCT00025002045	1353	6	-1	423	-1	0	intron_retention	FALSE	canonical	NA	NA	NA	NA	NA	NA	NA	TRUE	NA	NA	NA	C	coding	198	597	19	615	1659127	1668835	FALSE	10	GTTTGTCTGGAATTTGTTTT	NA	NA	NA	NA	AATAAA	-15_x000D_
PB.3658.1	LUXX01007331.1	+	2126	7	novel_in_catalog	ENSSSCG00025002298	novel	944	8	NA	NA	-2	0	intron_retention	TRUE	canonical	NA	NA	NA	NA	NA	NA	NA	TRUE	NA	NA	NA	C	coding	179	540	62	601	2007314	2013966	TRUE	15	CTGCTGGTTGCAAGTCATTG	NA	NA	NA	NA	AATAAA	-15_x000D_
PB.3658.2	LUXX01007331.1	+	1017	9	full-splice_match	ENSSSCG00025002298	ENSSSCT00025003023	1269	9	8	244	8	1	multi-exon	FALSE	canonical	NA	NA	NA	NA	NA	NA	NA	TRUE	NA	NA	NA	C	coding	255	768	47	814	2007314	2018825	FALSE	15	GCTGCTGGTTGCAAGTCATT	NA	NA	NA	NA	AATAAA	-14_x000D_
PB.3659.1	LUXX01007331.1	-	3922	29	full-splice_match	ENSSSCG00025003186	ENSSSCT00025004222	3963	29	40	1	-19	-1	multi-exon	TRUE	canonical	NA	NA	NA	NA	NA	NA	NA	TRUE	NA	NA	NA	A	coding	1135	3408	113	3520	2520546	2323671	FALSE	15	AGCCAGGGTCTGTGCTGCCA	NA	NA	NA	NA	AATAAA	-17_x000D_
PB.7461.1	LUXX01007398.1	-	442	3	full-splice_match	ENSSSCG00025003656	ENSSSCT00025004819	1603	3	10	1151	10	-1151	multi-exon	FALSE	canonical	NA	NA	NA	NA	NA	NA	NA	TRUE	NA	NA	NA	A	non_coding	NA	NA	NA	NA	NA	NA	NA	15	ATTGTAGGTTTTATTTTCTT	NA	NA	NA	NA	AATAAA	-18_x000D_
PB.7462.1	LUXX01007398.1	+	2879	10	novel_in_catalog	ENSSSCG00025003762	novel	2464	12	NA	NA	-8	421	intron_retention	FALSE	canonical	NA	NA	NA	NA	NA	NA	NA	TRUE	NA	NA	NA	B	coding	322	969	69	1037	31255	93558	FALSE	25	AATTCTGAGTTTTTGGTTAA	NA	NA	NA	NA	AATAAA	-14_x000D_
PB.7462.2	LUXX01007398.1	+	2162	10	novel_in_catalog	ENSSSCG00025003762	novel	2464	12	NA	NA	-7	-295	combination_of_known_junctions	FALSE	canonical	NA	NA	NA	NA	NA	NA	NA	TRUE	NA	NA	NA	B	coding	322	969	68	1036	31255	93558	FALSE	15	TAATGCTGTGATTGTCTGCT	NA	NA	NA	NA	ATTAAA	-16_x000D_
PB.7462.3	LUXX01007398.1	+	2442	10	novel_in_catalog	ENSSSCG00025003762	novel	2464	12	NA	NA	6	2	intron_retention	FALSE	canonical	NA	NA	NA	NA	NA	NA	NA	TRUE	NA	NA	NA	B	coding	322	969	51	1019	31255	93558	FALSE	30	TGAGACTTGTATGAATATGC	NA	NA	NA	NA	AATAAA	-19_x000D_
PB.6869.1	LUXX01007422.1	+	5200	39	full-splice_match	ENSSSCG00025004200	ENSSSCT00025005610	5320	39	-2	122	-1	-122	multi-exon	FALSE	canonical	NA	NA	NA	NA	NA	NA	NA	TRUE	NA	NA	NA	C	coding	1511	4536	97	4632	226202	396063	FALSE	15	ATGCTGTATTTGTATTTTTT	NA	NA	NA	NA	NA	NA_x000D_
PB.6869.2	LUXX01007422.1	+	1738	15	incomplete-splice_match	ENSSSCG00025004200	ENSSSCT00025005583	5039	38	28	89912	27	-89912	3prime_fragment	FALSE	canonical	NA	NA	NA	NA	NA	NA	NA	TRUE	NA	NA	NA	C	coding	557	1671	68	1738	226202	295654	FALSE	30	GTGAGTTGATCACTACACAT	NA	NA	NA	NA	NA	NA_x000D_
PB.6869.3	LUXX01007422.1	+	4610	39	full-splice_match	ENSSSCG00025004200	ENSSSCT00025005610	5320	39	33	677	33	-677	multi-exon	FALSE	canonical	NA	NA	NA	NA	NA	NA	NA	TRUE	NA	NA	NA	C	coding	1511	4536	62	4597	226202	396063	FALSE	60	AAGAAAGAAGATGAGAAAGG	NA	NA	NA	NA	NA	NA_x000D_
PB.6869.4	LUXX01007422.1	+	3598	30	incomplete-splice_match	ENSSSCG00025004200	ENSSSCT00025005583	5039	38	42	24561	41	-24561	3prime_fragment	FALSE	canonical	NA	NA	NA	NA	NA	NA	NA	TRUE	NA	NA	NA	C	coding	1181	3543	54	3596	226202	361003	FALSE	10	GTGTGAGGCTGCAGCGCTTG	NA	NA	NA	NA	ATTAAA	-34_x000D_
PB.6870.1	LUXX01007422.1	-	1694	12	incomplete-splice_match	ENSSSCG00025004297	ENSSSCT00025005752	6234	13	-21	4757	0	-3525	3prime_fragment	FALSE	canonical	NA	NA	NA	NA	NA	NA	NA	TRUE	NA	NA	NA	B	coding	505	1518	103	1620	474142	404841	FALSE	45	AATGAACACAAAGTTGCCAC	NA	NA	NA	NA	ATTAAA	-28_x000D_
PB.6870.2	LUXX01007422.1	-	1398	11	incomplete-splice_match	ENSSSCG00025004297	ENSSSCT00025005752	6234	13	-32	6685	-11	-5453	3prime_fragment	FALSE	canonical	NA	NA	NA	NA	NA	NA	NA	TRUE	NA	NA	NA	B	coding	428	1284	114	1397	474142	406696	FALSE	65	AAGAAGAAAAGAAGAAAGCT	NA	NA	NA	NA	NA	NA_x000D_
PB.6871.1	LUXX01007422.1	+	3590	19	incomplete-splice_match	ENSSSCG00025004368	ENSSSCT00025005838	4404	22	2798	0	2798	0	5prime_fragment	FALSE	canonical	NA	NA	NA	NA	NA	NA	NA	TRUE	NA	NA	NA	B	coding	828	2487	68	2554	502731	555866	FALSE	10	CCTTGTGACTGTGGCTGAGT	NA	NA	NA	NA	AGTAAA	-15_x000D_
PB.6871.3	LUXX01007422.1	+	2465	13	incomplete-splice_match	ENSSSCG00025004368	ENSSSCT00025005838	4404	22	21693	-1	21693	1	5prime_fragment	FALSE	canonical	NA	NA	NA	NA	NA	NA	NA	TRUE	NA	NA	NA	B	coding	442	1329	100	1428	530547	555866	FALSE	10	CTTGTGACTGTGGCTGAGTT	NA	NA	NA	NA	AGTAAA	-16_x000D_
PB.7364.1	LUXX01007560.1	-	2215	15	novel_in_catalog	ENSSSCG00025005264	novel	2401	16	NA	NA	-7	1	combination_of_known_junctions	FALSE	canonical	NA	NA	NA	NA	NA	NA	NA	TRUE	NA	NA	NA	B	coding	589	1770	31	1800	152870	117747	FALSE	20	AAATAGCTGGTCCTCTGGTC	NA	NA	NA	NA	AATAAA	-8_x000D_
PB.7364.2	LUXX01007560.1	-	2199	15	novel_not_in_catalog	ENSSSCG00025005264	novel	2401	16	NA	NA	11	1	at_least_one_novel_splicesite	FALSE	canonical	NA	NA	NA	NA	NA	NA	NA	TRUE	NA	NA	NA	B	coding	267	804	981	1784	128106	117747	FALSE	20	AAATAGCTGGTCCTCTGGTC	NA	NA	NA	NA	AATAAA	-8_x000D_
PB.7283.1	LUXX01007942.1	+	1482	1	intergenic	novelGene_557	novel	NA	NA	NA	NA	NA	NA	mono-exon	FALSE	NA	NA	NA	NA	NA	NA	NA	NA	NA	NA	NA	NA	A	non_coding	NA	NA	NA	NA	NA	NA	NA	95	AAAAAAGAAAAAAAAAAAAA	NA	NA	NA	NA	NA	NA_x000D_
PB.7284.1	LUXX01007942.1	-	3962	17	novel_not_in_catalog	ENSSSCG00025005845	novel	4072	19	NA	NA	159	23	intron_retention	FALSE	canonical	NA	NA	NA	NA	NA	NA	NA	TRUE	NA	NA	NA	A	coding	819	2460	169	2628	219740	188848	FALSE	5	ACCTGGTTGTGTCTTCTGTC	NA	NA	NA	NA	AATAAA	-17_x000D_
PB.7285.1	LUXX01007942.1	+	1883	8	full-splice_match	ENSSSCG00025005925	ENSSSCT00025007919	2228	8	341	4	1	-4	multi-exon	FALSE	canonical	NA	NA	NA	NA	NA	NA	NA	TRUE	NA	NA	NA	A	coding	439	1320	79	1398	262791	284264	FALSE	25	AAAATCCAGGTTGTGTGTGT	NA	NA	NA	NA	AATAAA	-14_x000D_
PB.7286.1	LUXX01007942.1	+	2710	2	novel_not_in_catalog	ENSSSCG00025005984	novel	2681	2	NA	NA	-31	2	at_least_one_novel_splicesite	FALSE	canonical	NA	NA	NA	NA	NA	NA	NA	TRUE	NA	NA	NA	A	coding	713	2142	283	2424	308291	310432	FALSE	10	AGCAGTGCCGTTGTCCTCTG	NA	NA	NA	NA	AATAAA	-18_x000D_
PB.7287.1	LUXX01007942.1	-	3715	1	full-splice_match	ENSSSCG00025006028	ENSSSCT00025008035	1995	1	-124	-1596	-124	1596	mono-exon	FALSE	NA	NA	NA	NA	NA	NA	NA	NA	NA	NA	NA	NA	A	coding	664	1995	125	2119	334609	332615	NA	15	GAGTCTGGCGCTGGTGTTAA	NA	NA	NA	NA	AATAAA	-18_x000D_
PB.1262.1	LUXX01007949.1	+	5201	28	incomplete-splice_match	ENSSSCG00025006132	ENSSSCT00025008174	5007	29	-129	-29	-24	1	intron_retention	FALSE	canonical	NA	NA	NA	NA	NA	NA	NA	TRUE	NA	NA	NA	A	coding	1296	3891	159	4049	39683	123996	FALSE	25	AAGATGCATCAGTCTTTCCT	NA	NA	NA	NA	AATAAA	-16_x000D_
PB.1263.1	LUXX01007949.1	-	3883	5	novel_in_catalog	ENSSSCG00025006182	novel	3782	5	NA	NA	3	-7	combination_of_known_splicesites	FALSE	canonical	NA	NA	NA	NA	NA	NA	NA	TRUE	NA	NA	NA	B	coding	471	1416	10	1425	138058	129096	FALSE	15	TGTTTTTTAAACCGTGTCCT	NA	NA	NA	NA	AATAAA	-16_x000D_
PB.1263.2	LUXX01007949.1	-	2915	5	novel_in_catalog	ENSSSCG00025006182	novel	3156	6	NA	NA	4	-21	combination_of_known_splicesites	FALSE	canonical	NA	NA	NA	NA	NA	NA	NA	TRUE	NA	NA	NA	B	coding	471	1416	9	1424	138058	129096	FALSE	100	AAAAAAAAAAAAAAAAAAAA	NA	NA	NA	NA	AGTAAA	-19_x000D_
PB.1264.1	LUXX01007949.1	-	3474	1	incomplete-splice_match	ENSSSCG00025006520	ENSSSCT00025008610	6598	3	85645	1275	84707	3	mono-exon	FALSE	NA	NA	NA	NA	NA	NA	NA	NA	NA	NA	NA	NA	A	coding	559	1680	532	2211	644174	642495	NA	65	AAAAAAAAAAATTGGGTGAA	NA	NA	NA	NA	NA	NA_x000D_
PB.1265.1	LUXX01007949.1	+	1996	1	intergenic	novelGene_92	novel	NA	NA	NA	NA	NA	NA	mono-exon	FALSE	NA	NA	NA	NA	NA	NA	NA	NA	NA	NA	NA	NA	A	non_coding	NA	NA	NA	NA	NA	NA	NA	75	AAAAACTAAACAAACAAACA	NA	NA	NA	NA	NA	NA_x000D_
PB.1266.1	LUXX01007949.1	+	2503	14	incomplete-splice_match	ENSSSCG00025012848	ENSSSCT00025017386	7144	25	86895	3490	86895	0	internal_fragment	FALSE	canonical	NA	NA	NA	NA	NA	NA	NA	TRUE	NA	NA	NA	A	coding	650	1953	116	2068	1474347	1523910	FALSE	25	ACCTATGTGTTTGTAAGCAG	NA	NA	NA	NA	AATAAA	-16_x000D_
PB.1267.1	LUXX01007949.1	+	2893	7	incomplete-splice_match	ENSSSCG00025005206	ENSSSCT00025007022	2841	8	147	2207	147	2	3prime_fragment	FALSE	canonical	NA	NA	NA	NA	NA	NA	NA	TRUE	NA	NA	NA	B	coding	365	1098	506	1603	2953234	3002747	FALSE	85	AAAAAAAAAAAAAAGGAAAG	NA	NA	NA	NA	NA	NA_x000D_
PB.1267.2	LUXX01007949.1	+	921	6	incomplete-splice_match	ENSSSCG00025005206	ENSSSCT00025007022	2841	8	523	5328	523	-1626	3prime_fragment	FALSE	canonical	NA	NA	NA	NA	NA	NA	NA	TRUE	NA	NA	NA	B	coding	264	792	130	921	2953234	3000916	FALSE	70	AGAGAAGAAAAATACGAAAA	NA	NA	NA	NA	CATAAA	-7_x000D_
PB.1268.1	LUXX01007949.1	-	1407	5	incomplete-splice_match	ENSSSCG00025005270	ENSSSCT00025007089	2184	6	-27	897	-27	-897	3prime_fragment	FALSE	canonical	NA	NA	NA	NA	NA	NA	NA	TRUE	NA	NA	NA	A	coding	252	759	220	978	3041737	3028472	FALSE	15	GACAATGTCTGCTTCTCTTC	NA	NA	NA	NA	AATAAA	-17_x000D_
PB.1269.1	LUXX01007949.1	-	5691	5	incomplete-splice_match	ENSSSCG00025005333	ENSSSCT00025007177	5709	6	285	2	285	-2	5prime_fragment	FALSE	canonical	NA	NA	NA	NA	NA	NA	NA	TRUE	NA	NA	NA	B	coding	297	894	70	963	3226508	3197672	FALSE	15	TGTTAGCTTCAGTGGATTTT	NA	NA	NA	NA	AATAAA	-18_x000D_
PB.1269.2	LUXX01007949.1	-	4508	5	incomplete-splice_match	ENSSSCG00025005333	ENSSSCT00025007177	5709	6	286	1184	286	-1184	5prime_fragment	FALSE	canonical	NA	NA	NA	NA	NA	NA	NA	TRUE	NA	NA	NA	B	coding	297	894	69	962	3226508	3197672	FALSE	35	AAATTTTTTTAAATATCTTT	NA	NA	NA	NA	AATAAA	-17_x000D_
PB.1269.3	LUXX01007949.1	-	3240	5	incomplete-splice_match	ENSSSCG00025005333	ENSSSCT00025007177	5709	6	278	2460	278	2435	5prime_fragment	FALSE	canonical	NA	NA	NA	NA	NA	NA	NA	TRUE	NA	NA	NA	B	coding	297	894	77	970	3226508	3197672	FALSE	75	AAAAAAAATTTTGAAAAAAA	NA	NA	NA	NA	ACTAAA	-26_x000D_
PB.1269.4	LUXX01007949.1	-	2758	5	incomplete-splice_match	ENSSSCG00025005333	ENSSSCT00025007177	5709	6	291	2929	291	1966	5prime_fragment	FALSE	canonical	NA	NA	NA	NA	NA	NA	NA	TRUE	NA	NA	NA	B	coding	297	894	64	957	3226508	3197672	FALSE	25	ACTGGTAAGTATCTCAGTGC	NA	NA	NA	NA	AATAAA	-17_x000D_
PB.1269.5	LUXX01007949.1	-	1995	1	novel_in_catalog	ENSSSCG00025005333	novel	6092	6	NA	NA	285	-27664	mono-exon_by_intron_retention	FALSE	NA	NA	NA	NA	NA	NA	NA	NA	NA	NA	NA	NA	B	non_coding	NA	NA	NA	NA	NA	NA	NA	70	AAAGAAAAAAAAATAGGATT	NA	NA	NA	NA	NA	NA_x000D_
PB.7322.1	LUXX01007989.1	+	1067	1	intergenic	novelGene_566	novel	NA	NA	NA	NA	NA	NA	mono-exon	FALSE	NA	NA	NA	NA	NA	NA	NA	NA	NA	NA	NA	NA	A	non_coding	NA	NA	NA	NA	NA	NA	NA	100	AAAAAAAAAAAAAAAAAAAA	NA	NA	NA	NA	AATATA	-23_x000D_
PB.7323.1	LUXX01007989.1	-	2596	10	novel_in_catalog	ENSSSCG00025000747	novel	4040	12	NA	NA	33055	8	intron_retention	FALSE	canonical	NA	NA	NA	NA	NA	NA	NA	TRUE	NA	NA	NA	B	coding	300	903	435	1337	171318	77383	FALSE	35	AAGTTTATGTAAATTTTATT	NA	NA	NA	NA	AATAAA	-22_x000D_
PB.7323.2	LUXX01007989.1	-	2081	7	novel_not_in_catalog	ENSSSCG00025000747	novel	7107	12	NA	NA	65894	8	at_least_one_novel_splicesite	FALSE	canonical	NA	NA	NA	NA	NA	NA	NA	TRUE	NA	NA	NA	B	coding	474	1425	122	1546	139741	76659	FALSE	35	AAGTTTATGTAAATTTTATT	NA	NA	NA	NA	AATAAA	-22_x000D_
PB.7323.3	LUXX01007989.1	-	3868	10	novel_in_catalog	ENSSSCG00025000747	novel	4040	12	NA	NA	3	2	intron_retention	FALSE	canonical	NA	NA	NA	NA	NA	NA	NA	TRUE	NA	NA	NA	B	coding	513	1542	1798	3339	171318	76659	FALSE	40	AATGGGAAGTTTATGTAAAT	NA	NA	NA	NA	AATAAA	-16_x000D_
PB.7323.4	LUXX01007989.1	-	2503	9	incomplete-splice_match	ENSSSCG00025000747	ENSSSCT00025000959	4040	12	-2	24587	-2	-24587	3prime_fragment	FALSE	canonical	NA	NA	NA	NA	NA	NA	NA	TRUE	NA	NA	NA	B	coding	512	1539	247	1785	174571	171382	TRUE	75	AAAAATCTAAAGAAGAAAAA	NA	NA	NA	NA	NA	NA_x000D_
PB.7323.5	LUXX01007989.1	-	2419	8	incomplete-splice_match	ENSSSCG00025000747	ENSSSCT00025000959	4040	12	13	27227	13	-27227	3prime_fragment	FALSE	canonical	NA	NA	NA	NA	NA	NA	NA	TRUE	NA	NA	NA	B	coding	512	1539	232	1770	174571	171382	TRUE	75	AAATAAAGAAAAAAGATGAA	NA	NA	NA	NA	AATAAA	-15_x000D_
PB.7323.6	LUXX01007989.1	-	2042	3	incomplete-splice_match	ENSSSCG00025000747	ENSSSCT00025000959	4040	12	9	94982	9	-94982	3prime_fragment	FALSE	canonical	NA	NA	NA	NA	NA	NA	NA	TRUE	NA	NA	NA	B	coding	512	1539	236	1774	174571	171382	FALSE	25	GAGTTGACTATGGTCTCATA	NA	NA	NA	NA	AATAAA	-25_x000D_
PB.7159.1	LUXX01008036.1	-	3726	12	novel_in_catalog	ENSSSCG00025002076	novel	3844	13	NA	NA	21	0	intron_retention	FALSE	canonical	NA	NA	NA	NA	NA	NA	NA	TRUE	NA	NA	NA	B	coding	1095	3288	82	3369	56570	23473	TRUE	20	AACTTTCCATGGTCTCCATT	NA	NA	NA	NA	AATAAA	-15_x000D_
PB.7159.2	LUXX01008036.1	-	3625	11	novel_in_catalog	ENSSSCG00025002076	novel	3844	13	NA	NA	-22	0	intron_retention	FALSE	canonical	NA	NA	NA	NA	NA	NA	NA	TRUE	NA	NA	NA	B	coding	1095	3288	75	3362	56570	23473	TRUE	20	AACTTTCCATGGTCTCCATT	NA	NA	NA	NA	AATAAA	-15_x000D_
PB.7160.1	LUXX01008036.1	+	2249	8	incomplete-splice_match	ENSSSCG00025002399	ENSSSCT00025003111	2146	9	122	-13	28	-2	5prime_fragment	FALSE	canonical	NA	NA	NA	NA	NA	NA	NA	TRUE	NA	NA	NA	B	coding	468	1407	300	1706	65742	77346	FALSE	25	GAGGAGTCTATTCCATAGCT	NA	NA	NA	NA	AATAAA	-19_x000D_
PB.7160.2	LUXX01008036.1	+	2113	8	novel_in_catalog	ENSSSCG00025002399	novel	2146	9	NA	NA	-3	-3	combination_of_known_junctions	FALSE	canonical	NA	NA	NA	NA	NA	NA	NA	TRUE	NA	NA	NA	B	coding	468	1407	171	1577	65742	77346	FALSE	35	AACAATGGAGGAGTCTATTC	NA	NA	NA	NA	AATAAA	-12_x000D_
PB.7161.1	LUXX01008036.1	-	1810	12	novel_in_catalog	ENSSSCG00025002539	novel	3214	12	NA	NA	-13	-1558	combination_of_known_junctions	FALSE	canonical	NA	NA	NA	NA	NA	NA	NA	TRUE	NA	NA	NA	A	coding	479	1440	44	1483	157623	143434	FALSE	40	AAAAAGGATTCAGGAGTTCC	NA	NA	NA	NA	AATAAA	-20_x000D_
PB.7162.1	LUXX01008036.1	+	1084	9	full-splice_match	ENSSSCG00025002871	ENSSSCT00025003809	1245	9	164	-3	62	-2	multi-exon	FALSE	canonical	NA	NA	NA	NA	NA	NA	NA	TRUE	NA	NA	NA	A	coding	259	780	159	938	203204	208569	FALSE	40	AACTTGAAAGACTAAGCTGT	NA	NA	NA	NA	AATAAA	-13_x000D_
PB.7163.1	LUXX01008036.1	-	2081	14	full-splice_match	ENSSSCG00025003300	ENSSSCT00025004343	2931	14	77	773	0	-2	multi-exon	TRUE	canonical	NA	NA	NA	NA	NA	NA	NA	TRUE	NA	NA	NA	A	coding	631	1896	26	1921	311447	271716	FALSE	30	AACAGAAACCCCTCCTCTTC	NA	NA	NA	NA	ATTAAA	-42_x000D_
PB.7164.1	LUXX01008036.1	+	4702	18	novel_not_in_catalog	ENSSSCG00025003550	novel	5261	18	NA	NA	2	72	intron_retention	TRUE	non_canonical	NA	NA	NA	NA	NA	NA	NA	TRUE	NA	NA	NA	B	coding	421	1266	589	1854	332733	345938	FALSE	10	CACTCACTGTGTCTTTGTTG	NA	NA	NA	NA	AGTAAA	-19_x000D_
PB.7164.2	LUXX01008036.1	+	5278	18	novel_not_in_catalog	ENSSSCG00025003550	novel	5261	18	NA	NA	0	1	intron_retention	FALSE	non_canonical	NA	NA	NA	NA	NA	NA	NA	TRUE	NA	NA	NA	B	coding	421	1266	586	1851	332733	345938	FALSE	15	AACATGTCCTTTTGTGTCTG	NA	NA	NA	NA	TATAAA	-12_x000D_
PB.7164.3	LUXX01008036.1	+	4614	17	novel_in_catalog	ENSSSCG00025003550	novel	5261	18	NA	NA	0	66	intron_retention	FALSE	canonical	NA	NA	NA	NA	NA	NA	NA	TRUE	NA	NA	NA	B	coding	585	1758	15	1772	311816	345938	FALSE	20	AGCCATCACTCACTGTGTCT	NA	NA	NA	NA	AGTAAA	-13_x000D_
PB.6240.1	LUXX01008045.1	+	1036	3	full-splice_match	ENSSSCG00025003964	ENSSSCT00025005298	1595	3	559	0	559	0	multi-exon	FALSE	canonical	NA	NA	NA	NA	NA	NA	NA	TRUE	NA	NA	NA	A	coding	73	222	107	328	113874	118363	FALSE	35	AAAATATACTGAGTCTGCTG	NA	NA	NA	NA	AATAAA	-18_x000D_
PB.6241.2	LUXX01008045.1	-	3423	19	novel_in_catalog	ENSSSCG00025004229	novel	3370	20	NA	NA	-6	1	intron_retention	FALSE	canonical	NA	NA	NA	NA	NA	NA	NA	TRUE	NA	NA	NA	B	coding	672	2019	19	2037	252111	220716	FALSE	40	ATCTACTGAAAAATTCTTCA	NA	NA	NA	NA	AATAAA	-21_x000D_
PB.6241.3	LUXX01008045.1	-	1655	16	incomplete-splice_match	ENSSSCG00025004229	ENSSSCT00025005648	3370	20	0	10254	0	-10254	3prime_fragment	FALSE	canonical	NA	NA	NA	NA	NA	NA	NA	TRUE	NA	NA	NA	B	coding	547	1641	13	1653	252111	229587	FALSE	25	GTAATGCTTTTCATTGTAAC	NA	NA	NA	NA	AAGAAA	-42_x000D_
PB.6242.1	LUXX01008045.1	-	4212	9	incomplete-splice_match	ENSSSCG00025004340	ENSSSCT00025005794	4033	10	189	-9	189	9	5prime_fragment	FALSE	canonical	NA	NA	NA	NA	NA	NA	NA	TRUE	NA	NA	NA	A	coding	425	1278	362	1639	280154	260948	FALSE	30	AAGCTTTAGTCATTCATTCA	NA	NA	NA	NA	AATAAA	-24_x000D_
PB.6243.1	LUXX01008045.1	+	3944	11	novel_in_catalog	ENSSSCG00025004375	novel	4830	11	NA	NA	-11	81	combination_of_known_junctions	FALSE	canonical	NA	NA	NA	NA	NA	NA	NA	TRUE	NA	NA	NA	A	coding	539	1620	146	1765	281015	327018	FALSE	25	TAAATATGTGTGTGTACTTT	NA	NA	NA	NA	AATATA	-16_x000D_
PB.6244.1	LUXX01008045.1	+	3528	15	novel_not_in_catalog	ENSSSCG00025004396	novel	8399	16	NA	NA	-7	-2799	at_least_one_novel_splicesite	TRUE	canonical	NA	NA	NA	NA	NA	NA	NA	TRUE	NA	NA	NA	A	coding	999	3000	431	3430	339479	372333	FALSE	35	TAAGAAACTTGTCTATTTAT	NA	NA	NA	NA	NA	NA_x000D_
PB.6245.1	LUXX01008045.1	-	3298	18	novel_in_catalog	ENSSSCG00025004637	novel	3406	20	NA	NA	7	2	intron_retention	FALSE	canonical	NA	NA	NA	NA	NA	NA	NA	TRUE	NA	NA	NA	B	coding	879	2640	139	2778	785616	734972	FALSE	55	AAAAAAATCAAAATTTTTTG	NA	NA	NA	NA	AATAAA	-10_x000D_
PB.6245.2	LUXX01008045.1	-	2785	18	novel_in_catalog	ENSSSCG00025004637	novel	3406	20	NA	NA	7	-511	intron_retention	FALSE	canonical	NA	NA	NA	NA	NA	NA	NA	TRUE	NA	NA	NA	B	coding	879	2640	139	2778	785616	734972	FALSE	70	AAAAGAAGAAAGATAAATGA	NA	NA	NA	NA	NA	NA_x000D_
PB.6245.3	LUXX01008045.1	-	2344	16	novel_in_catalog	ENSSSCG00025004637	novel	3406	20	NA	NA	7	-5429	intron_retention	FALSE	canonical	NA	NA	NA	NA	NA	NA	NA	TRUE	NA	NA	NA	B	coding	735	2205	139	2343	785616	739884	FALSE	75	AAAAAAAAGAAGCCAAACAA	NA	NA	NA	NA	NA	NA_x000D_
PB.6849.1	LUXX01008107.1	-	5362	35	novel_not_in_catalog	ENSSSCG00025001237	novel	7445	35	NA	NA	4	-1257	at_least_one_novel_splicesite	TRUE	canonical	NA	NA	NA	NA	NA	NA	NA	TRUE	NA	NA	NA	B	coding	1448	4347	156	4502	411713	277869	FALSE	35	AGTTTTTAATAGTCTAGAAT	NA	NA	NA	NA	AATAAA	-18_x000D_
PB.6849.2	LUXX01008107.1	-	4132	32	incomplete-splice_match	ENSSSCG00025001237	ENSSSCT00025001564	7355	34	0	8126	0	-7286	3prime_fragment	FALSE	canonical	NA	NA	NA	NA	NA	NA	NA	TRUE	NA	NA	NA	B	coding	1324	3972	160	4131	411713	283039	FALSE	65	AAGAAGAGGAAGAAGAAGAA	NA	NA	NA	NA	AAAAAG	-34_x000D_
PB.6849.3	LUXX01008107.1	-	4086	32	novel_not_in_catalog	ENSSSCG00025001237	novel	7355	34	NA	NA	0	-7326	at_least_one_novel_splicesite	FALSE	canonical	NA	NA	NA	NA	NA	NA	NA	TRUE	NA	NA	NA	B	coding	1309	3927	160	4086	411713	283078	FALSE	80	AAAAAAGGAAGCAAAAAAAA	NA	NA	NA	NA	AATGAA	-8_x000D_
PB.6849.4	LUXX01008107.1	-	3219	27	incomplete-splice_match	ENSSSCG00025001237	ENSSSCT00025001871	6356	33	20	17679	20	-17679	3prime_fragment	FALSE	canonical	NA	NA	NA	NA	NA	NA	NA	TRUE	NA	NA	NA	B	coding	1058	3174	44	3217	411713	293433	FALSE	55	AAAAATGAATGAAGTATGTA	NA	NA	NA	NA	ATTAAA	-33_x000D_
PB.6850.1	LUXX01008107.1	+	2027	5	novel_in_catalog	ENSSSCG00025001668	novel	5108	6	NA	NA	-41	-3240	combination_of_known_splicesites	FALSE	canonical	NA	NA	NA	NA	NA	NA	NA	TRUE	NA	NA	NA	B	coding	491	1476	190	1665	504012	522940	FALSE	35	ATTTTAAATGTTTTTATAAT	NA	NA	NA	NA	AATAAA	-17_x000D_
PB.6850.2	LUXX01008107.1	+	2087	6	novel_in_catalog	ENSSSCG00025001668	novel	5108	6	NA	NA	-24	-3240	combination_of_known_junctions	FALSE	canonical	NA	NA	NA	NA	NA	NA	NA	TRUE	NA	NA	NA	B	coding	581	1746	173	1918	504012	523133	FALSE	35	ATTTTAAATGTTTTTATAAT	NA	NA	NA	NA	AATAAA	-17_x000D_
PB.6851.1	LUXX01008107.1	-	1946	10	incomplete-splice_match	ENSSSCG00025002002	ENSSSCT00025002582	10774	27	-11	37756	-11	-37756	3prime_fragment	FALSE	canonical	NA	NA	NA	NA	NA	NA	NA	TRUE	NA	NA	NA	A	coding	581	1743	204	1946	690769	676960	FALSE	75	AAAAAGAAAACAAAAAAGTT	NA	NA	NA	NA	AATATA	-42_x000D_
PB.7340.1	LUXX01008114.1	+	2935	3	full-splice_match	ENSSSCG00025002339	ENSSSCT00025003018	2961	3	5	21	5	2	multi-exon	FALSE	canonical	NA	NA	NA	NA	NA	NA	NA	TRUE	NA	NA	NA	C	coding	919	2760	149	2908	182551	186979	FALSE	95	AAAAAAAAAAAAAAAGAAAA	NA	NA	NA	NA	NA	NA_x000D_
PB.7340.2	LUXX01008114.1	+	2780	2	full-splice_match	ENSSSCG00025002339	ENSSSCT00025003039	3908	2	24	1104	24	0	multi-exon	FALSE	canonical	NA	NA	NA	NA	NA	NA	NA	TRUE	NA	NA	NA	C	coding	904	2715	41	2755	174299	186979	FALSE	85	TGAAAAAAAAAAAAAAAGAA	NA	NA	NA	NA	NA	NA_x000D_
PB.7341.1	LUXX01008114.1	+	3075	3	full-splice_match	ENSSSCG00025002511	ENSSSCT00025003240	3590	3	-59	574	-59	-1	multi-exon	FALSE	canonical	NA	NA	NA	NA	NA	NA	NA	TRUE	NA	NA	NA	C	coding	447	1344	671	2014	243046	244389	FALSE	25	TGAAAAATTGTGTGTGTGTG	NA	NA	NA	NA	AATAAA	-19_x000D_
PB.7341.2	LUXX01008114.1	+	2650	2	full-splice_match	ENSSSCG00025002511	ENSSSCT00025003310	3218	2	-5	573	-5	0	multi-exon	FALSE	canonical	NA	NA	NA	NA	NA	NA	NA	TRUE	NA	NA	NA	C	coding	447	1344	245	1588	243046	244389	FALSE	25	GAAAAATTGTGTGTGTGTGT	NA	NA	NA	NA	AATAAA	-20_x000D_
PB.5868.1	LUXX01008172.1	-	1936	3	incomplete-splice_match	ENSSSCG00025003586	ENSSSCT00025004738	1806	4	-23	0	-23	0	intron_retention	FALSE	canonical	NA	NA	NA	NA	NA	NA	NA	TRUE	NA	NA	NA	A	coding	233	702	226	927	243953	236200	FALSE	15	TAGTGTTGTGTTTTGGAAGT	NA	NA	NA	NA	AATAAA	-14_x000D_
PB.5869.1	LUXX01008172.1	-	3758	6	novel_in_catalog	ENSSSCG00025003716	novel	2956	7	NA	NA	55	5	intron_retention	FALSE	canonical	NA	NA	NA	NA	NA	NA	NA	TRUE	NA	NA	NA	A	coding	285	858	63	920	404261	274682	FALSE	15	AACAGCCTCTGTCTCTTTTT	NA	NA	NA	NA	AATAAA	-21_x000D_
PB.5870.1	LUXX01008172.1	+	1916	5	incomplete-splice_match	ENSSSCG00025004147	ENSSSCT00025005482	1875	6	0	2	0	-2	intron_retention	FALSE	canonical	NA	NA	NA	NA	NA	NA	NA	TRUE	NA	NA	NA	A	coding	382	1149	154	1302	495049	497036	FALSE	35	AATATCTGAGTATATGGCAT	NA	NA	NA	NA	AATAAA	-14_x000D_
PB.5871.1	LUXX01008172.1	-	1157	5	incomplete-splice_match	ENSSSCG00025003987	ENSSSCT00025005457	8295	8	0	39922	0	-39922	3prime_fragment	FALSE	canonical	NA	NA	NA	NA	NA	NA	NA	TRUE	NA	NA	NA	A	coding	329	987	169	1155	592353	584183	FALSE	65	GAAAAGGAAAGAAAATTCAA	NA	NA	NA	NA	NA	NA_x000D_
PB.3885.1	LUXX01008254.1	+	1253	8	incomplete-splice_match	ENSSSCG00025004909	ENSSSCT00025006649	2920	10	-1	68843	-1	-68843	3prime_fragment	FALSE	canonical	NA	NA	NA	NA	NA	NA	NA	TRUE	NA	NA	NA	A	coding	297	894	122	1015	741238	753506	FALSE	30	TGTTGATGTCAAAATCAGGG	NA	NA	NA	NA	AATAAA	-16_x000D_
PB.3886.2	LUXX01008254.1	-	3129	1	genic	ENSSSCG00025004984	novel	NA	NA	NA	NA	44464	6	mono-exon	FALSE	NA	NA	NA	NA	NA	NA	NA	NA	NA	NA	NA	NA	C	non_coding	NA	NA	NA	NA	NA	NA	NA	20	TATCTTAATGTCTATTTTTT	NA	NA	NA	NA	ATTAAA	-18_x000D_
PB.3886.4	LUXX01008254.1	-	1766	6	full-splice_match	ENSSSCG00025004984	ENSSSCT00025006743	4913	6	-91	3238	-91	-3238	multi-exon	FALSE	canonical	NA	NA	NA	NA	NA	NA	NA	TRUE	NA	NA	NA	C	coding	368	1107	232	1338	1429863	1386083	FALSE	70	AAAAAAAAAAAATGTACATT	NA	NA	NA	NA	NA	NA_x000D_
PB.3886.5	LUXX01008254.1	-	1472	5	novel_in_catalog	ENSSSCG00025004984	novel	4913	6	NA	NA	124	-3238	combination_of_known_splicesites	FALSE	canonical	NA	NA	NA	NA	NA	NA	NA	TRUE	NA	NA	NA	C	coding	308	927	118	1044	1429762	1386083	FALSE	70	AAAAAAAAAAAATGTACATT	NA	NA	NA	NA	NA	NA_x000D_
PB.3886.6	LUXX01008254.1	-	1035	1	intergenic	novelGene_309	novel	NA	NA	NA	NA	NA	NA	mono-exon	FALSE	NA	NA	NA	NA	NA	NA	NA	NA	NA	NA	NA	NA	A	non_coding	NA	NA	NA	NA	NA	NA	NA	60	AAATACAAATAAAATTGCAG	NA	NA	NA	NA	NA	NA_x000D_
PB.3886.7	LUXX01008254.1	-	3290	1	novel_in_catalog	ENSSSCG00025004984	novel	4913	6	NA	NA	82	-44215	mono-exon	FALSE	NA	NA	NA	NA	NA	NA	NA	NA	NA	NA	NA	NA	C	coding	153	462	160	621	1429762	1429301	NA	70	AAGAAAAAGGAAAAGAGGAA	NA	NA	NA	NA	AAGAAA	-15_x000D_
PB.3886.8	LUXX01008254.1	-	2635	1	novel_in_catalog	ENSSSCG00025004984	novel	4913	6	NA	NA	82	-44870	mono-exon	FALSE	NA	NA	NA	NA	NA	NA	NA	NA	NA	NA	NA	NA	C	coding	153	462	160	621	1429762	1429301	NA	75	AAAAAAAAAATCAGAAAATG	NA	NA	NA	NA	NA	NA_x000D_
PB.3886.9	LUXX01008254.1	-	2408	1	novel_in_catalog	ENSSSCG00025004984	novel	4913	6	NA	NA	6	-45173	mono-exon	FALSE	NA	NA	NA	NA	NA	NA	NA	NA	NA	NA	NA	NA	C	coding	64	195	135	329	1429863	1429669	NA	65	AAAAAGAAGAAAACAATTCT	NA	NA	NA	NA	AATAAA	-17_x000D_
PB.3887.1	LUXX01008254.1	+	1276	8	incomplete-splice_match	ENSSSCG00025005078	ENSSSCT00025006853	3461	9	11	2277	11	-2277	3prime_fragment	FALSE	canonical	NA	NA	NA	NA	NA	NA	NA	TRUE	NA	NA	NA	A	coding	303	912	24	935	1657900	1780388	FALSE	75	AAATAAAGAAAAATAATAAT	NA	NA	NA	NA	AGTAAA	-39_x000D_
PB.3888.1	LUXX01008254.1	+	6576	10	full-splice_match	ENSSSCG00025005150	ENSSSCT00025006938	7963	10	470	917	470	-26	multi-exon	TRUE	canonical	NA	NA	NA	NA	NA	NA	NA	TRUE	NA	NA	NA	C	coding	1188	3567	12	3578	1914392	2099962	FALSE	95	AAAGAAAAAAAAAAAAAAAA	NA	NA	NA	NA	NA	NA_x000D_
PB.3888.2	LUXX01008254.1	+	3143	1	intergenic	novelGene_310	novel	NA	NA	NA	NA	NA	NA	mono-exon	FALSE	NA	NA	NA	NA	NA	NA	NA	NA	NA	NA	NA	NA	A	non_coding	NA	NA	NA	NA	NA	NA	NA	80	AAAAAGACAAAAAGACAAAA	NA	NA	NA	NA	NA	NA_x000D_
PB.3888.3	LUXX01008254.1	+	746	6	novel_not_in_catalog	ENSSSCG00025005150	novel	7963	10	NA	NA	141408	-8525	at_least_one_novel_splicesite	FALSE	canonical	NA	NA	NA	NA	NA	NA	NA	TRUE	NA	NA	NA	C	coding	209	627	120	746	2057580	2094461	FALSE	65	AAGAAAGAGAAAGAAAATGC	NA	NA	NA	NA	NA	NA_x000D_
PB.3889.1	LUXX01008254.1	-	1075	1	antisense	novelGene_ENSSSCG00025005150_AS	novel	NA	NA	NA	NA	NA	NA	mono-exon	FALSE	NA	NA	NA	NA	NA	NA	NA	NA	NA	NA	NA	NA	A	non_coding	NA	NA	NA	NA	NA	NA	NA	100	AAAAAAAAAAAAAAAAAAAA	NA	NA	NA	NA	AAAACA	-41_x000D_
PB.3890.1	LUXX01008254.1	+	710	1	intergenic	novelGene_311	novel	NA	NA	NA	NA	NA	NA	mono-exon	FALSE	NA	NA	NA	NA	NA	NA	NA	NA	NA	NA	NA	NA	A	non_coding	NA	NA	NA	NA	NA	NA	NA	100	AAAAAAAAAAAAAAAAAAAA	NA	NA	NA	NA	NA	NA_x000D_
PB.3891.1	LUXX01008254.1	-	4040	3	incomplete-splice_match	ENSSSCG00025005199	ENSSSCT00025007001	8509	13	20	61335	20	-57176	3prime_fragment	FALSE	canonical	NA	NA	NA	NA	NA	NA	NA	TRUE	NA	NA	NA	A	coding	108	327	232	558	2280378	2256971	FALSE	40	AAAAAGATCTTCTTTATTAT	NA	NA	NA	NA	NA	NA_x000D_
PB.3892.1	LUXX01008254.1	-	1652	1	genic	ENSSSCG00025005239	novel	NA	NA	NA	NA	1006	1183	mono-exon	FALSE	NA	NA	NA	NA	NA	NA	NA	NA	NA	NA	NA	NA	B	coding	105	318	68	385	2349762	2349445	NA	60	AAAAAAAAAATTATTTCCTA	NA	NA	NA	NA	AATACA	-15_x000D_
PB.3892.2	LUXX01008254.1	-	1034	1	genic	ENSSSCG00025005239	novel	NA	NA	NA	NA	804	363	mono-exon	FALSE	NA	NA	NA	NA	NA	NA	NA	NA	NA	NA	NA	NA	B	coding	191	576	12	587	2350020	2349445	NA	10	ATTTTTGGTGGTCATTTTTT	NA	NA	NA	NA	AATAAA	-13_x000D_
PB.7148.1	LUXX01008289.1	+	4269	8	novel_in_catalog	ENSSSCG00025005370	novel	4871	8	NA	NA	-17	-756	intron_retention	FALSE	canonical	NA	NA	NA	NA	NA	NA	NA	TRUE	NA	NA	NA	A	coding	443	1332	117	1448	284463	310005	FALSE	50	TAAAAAAAGAGATCAGTTTG	NA	NA	NA	NA	AATAAA	-9_x000D_
PB.6372.1	LUXX01008376.1	-	3188	15	incomplete-splice_match	ENSSSCG00025049826	ENSSSCT00025069340	7719	25	-4	42310	0	-41677	3prime_fragment	FALSE	canonical	NA	NA	NA	NA	NA	NA	NA	TRUE	NA	NA	NA	B	coding	970	2910	278	3187	474405	394416	FALSE	75	AAGAAAAAAAGATGGAAAAA	NA	NA	NA	NA	NA	NA_x000D_
PB.6372.2	LUXX01008376.1	-	2964	15	incomplete-splice_match	ENSSSCG00025049826	ENSSSCT00025069340	7719	25	-23	42553	-19	-41920	3prime_fragment	FALSE	canonical	NA	NA	NA	NA	NA	NA	NA	TRUE	NA	NA	NA	B	coding	889	2667	297	2963	474405	394659	FALSE	60	AAAAACAGAATAGTGAAATG	NA	NA	NA	NA	NA	NA_x000D_
PB.6373.1	LUXX01008376.1	-	4885	5	incomplete-splice_match	ENSSSCG00025051364	ENSSSCT00025070210	10417	24	93753	-1	93753	1	5prime_fragment	FALSE	canonical	NA	NA	NA	NA	NA	NA	NA	TRUE	NA	NA	NA	A	coding	1098	3297	209	3505	586286	577435	FALSE	10	TATGTGCAGCTGTCTGCTTG	NA	NA	NA	NA	ATTAAA	-11_x000D_
PB.6374.1	LUXX01008376.1	-	4535	2	full-splice_match	ENSSSCG00025052011	ENSSSCT00025071119	5406	2	42	829	42	6	multi-exon	FALSE	canonical	NA	NA	NA	NA	NA	NA	NA	TRUE	NA	NA	NA	C	coding	608	1827	85	1911	720334	718508	TRUE	10	TTTGTATCTATCTTTCTTTG	NA	NA	NA	NA	AATAAA	-16_x000D_
PB.6374.2	LUXX01008376.1	-	3951	1	genic	ENSSSCG00025052011	novel	NA	NA	NA	NA	-5	-4248	mono-exon	FALSE	NA	NA	NA	NA	NA	NA	NA	NA	NA	NA	NA	NA	C	coding	608	1827	140	1966	720334	718508	NA	95	AAAAAACAAAAAAAAAAAAA	NA	NA	NA	NA	NA	NA_x000D_
PB.6375.1	LUXX01008376.1	+	2443	19	full-splice_match	ENSSSCG00025052118	ENSSSCT00025071280	2592	19	70	79	70	-79	multi-exon	TRUE	canonical	NA	NA	NA	NA	NA	NA	NA	TRUE	NA	NA	NA	A	coding	757	2274	30	2303	720823	806944	FALSE	35	AACATGACTTCTTATTAATT	NA	NA	NA	NA	AATAAA	-13_x000D_
PB.6376.1	LUXX01008376.1	+	1603	1	intergenic	novelGene_499	novel	NA	NA	NA	NA	NA	NA	mono-exon	FALSE	NA	NA	NA	NA	NA	NA	NA	NA	NA	NA	NA	NA	A	non_coding	NA	NA	NA	NA	NA	NA	NA	100	AAAAAAAAAAAAAAAAAAAA	NA	NA	NA	NA	ATTAAA	-21_x000D_
PB.6377.1	LUXX01008376.1	-	2173	14	novel_in_catalog	ENSSSCG00025052722	novel	3259	27	NA	NA	-6	-245	intron_retention	FALSE	canonical	NA	NA	NA	NA	NA	NA	NA	TRUE	NA	NA	NA	A	coding	424	1275	342	1616	900493	809217	FALSE	50	AAAAAGATATAGGGAGTGTA	NA	NA	NA	NA	AAAAAG	-44_x000D_
PB.6354.1	LUXX01008409.1	-	5277	28	novel_in_catalog	ENSSSCG00025055815	novel	5393	30	NA	NA	-8	-21	intron_retention	TRUE	canonical	NA	NA	NA	NA	NA	NA	NA	TRUE	NA	NA	NA	A	coding	1523	4572	145	4716	345193	269219	FALSE	75	AAAATAAAGACAATAAAGAA	NA	NA	NA	NA	NA	NA_x000D_
PB.6355.1	LUXX01008409.1	+	2558	7	full-splice_match	ENSSSCG00025059405	ENSSSCT00025081327	2593	7	46	-11	3	11	multi-exon	FALSE	canonical	NA	NA	NA	NA	NA	NA	NA	TRUE	NA	NA	NA	A	coding	271	816	23	838	475911	507980	FALSE	15	ATGTGTGTGTTCTCTAAGCT	NA	NA	NA	NA	AATAAA	-25_x000D_
PB.6356.1	LUXX01008409.1	-	5218	8	novel_in_catalog	ENSSSCG00025059871	novel	5130	10	NA	NA	47	-1	intron_retention	FALSE	canonical	NA	NA	NA	NA	NA	NA	NA	TRUE	NA	NA	NA	B	coding	208	627	264	890	574712	516106	FALSE	35	AACACAAAGCCTCTTGTCTA	NA	NA	NA	NA	AATAAA	-15_x000D_
PB.6356.2	LUXX01008409.1	-	3098	8	novel_in_catalog	ENSSSCG00025059871	novel	5130	10	NA	NA	2	9	intron_retention	FALSE	canonical	NA	NA	NA	NA	NA	NA	NA	TRUE	NA	NA	NA	B	coding	208	627	388	1014	574712	516106	FALSE	40	AAAAGTAGCCCCTGGGAATA	NA	NA	NA	NA	AATAAA	-29_x000D_
PB.6356.3	LUXX01008409.1	-	1357	8	novel_in_catalog	ENSSSCG00025059871	novel	5130	10	NA	NA	-5	-1744	intron_retention	FALSE	canonical	NA	NA	NA	NA	NA	NA	NA	TRUE	NA	NA	NA	B	coding	208	627	400	1026	574712	516106	FALSE	20	AAAGATGTGCTTTTTTGTTT	NA	NA	NA	NA	GATAAA	-21_x000D_
PB.6357.1	LUXX01008409.1	+	773	1	intergenic	novelGene_496	novel	NA	NA	NA	NA	NA	NA	mono-exon	FALSE	NA	NA	NA	NA	NA	NA	NA	NA	NA	NA	NA	NA	A	non_coding	NA	NA	NA	NA	NA	NA	NA	100	AAAAAAAAAAAAAAAAAAAA	NA	NA	NA	NA	AATAAA	-40_x000D_
PB.6358.1	LUXX01008409.1	+	2460	1	intergenic	novelGene_497	novel	NA	NA	NA	NA	NA	NA	mono-exon	FALSE	NA	NA	NA	NA	NA	NA	NA	NA	NA	NA	NA	NA	A	non_coding	NA	NA	NA	NA	NA	NA	NA	90	AAAAAGCAAAAAAAAAAAAA	NA	NA	NA	NA	NA	NA_x000D_
PB.6359.2	LUXX01008409.1	-	1865	14	incomplete-splice_match	ENSSSCG00025061480	ENSSSCT00025084188	6735	16	28155	4703	28155	-4682	5prime_fragment	TRUE	non_canonical	NA	NA	NA	NA	NA	NA	NA	TRUE	NA	NA	NA	B	coding	478	1437	123	1559	846854	787140	FALSE	30	ATATTTGGAATAGCTTATCT	NA	NA	NA	NA	AATAAA	-31_x000D_
PB.6359.3	LUXX01008409.1	-	2024	15	novel_not_in_catalog	ENSSSCG00025061480	novel	7167	16	NA	NA	320	-4690	at_least_one_novel_splicesite	FALSE	canonical	NA	NA	NA	NA	NA	NA	NA	TRUE	NA	NA	NA	B	coding	475	1428	299	1726	846854	787140	FALSE	50	AAACACAGATATTTGGAATA	NA	NA	NA	NA	AATAAA	-23_x000D_
PB.6360.1	LUXX01008409.1	-	4226	10	novel_in_catalog	ENSSSCG00025062486	novel	4384	11	NA	NA	825	1	combination_of_known_junctions	FALSE	canonical	NA	NA	NA	NA	NA	NA	NA	TRUE	NA	NA	NA	B	coding	776	2331	126	2456	1000576	988174	FALSE	25	AAGCAGCGTCTTTGCACAGG	NA	NA	NA	NA	ATTAAA	-16_x000D_
PB.6360.2	LUXX01008409.1	-	4340	10	incomplete-splice_match	ENSSSCG00025062486	ENSSSCT00025086053	4329	12	1360	-279	64	0	5prime_fragment	FALSE	canonical	NA	NA	NA	NA	NA	NA	NA	TRUE	NA	NA	NA	B	coding	776	2331	241	2571	1000576	988174	FALSE	30	AAAGCAGCGTCTTTGCACAG	NA	NA	NA	NA	ATTAAA	-15_x000D_
PB.6360.3	LUXX01008409.1	-	4078	10	incomplete-splice_match	ENSSSCG00025062486	ENSSSCT00025086053	4329	12	1345	-2	49	2	5prime_fragment	FALSE	canonical	NA	NA	NA	NA	NA	NA	NA	TRUE	NA	NA	NA	B	coding	776	2331	256	2586	1000576	988174	FALSE	85	AAAGAAAAAAGAAAAAAAGA	NA	NA	NA	NA	TTTAAA	-37_x000D_
PB.6360.4	LUXX01008409.1	-	3944	10	novel_in_catalog	ENSSSCG00025062486	novel	4384	11	NA	NA	829	2	combination_of_known_junctions	FALSE	canonical	NA	NA	NA	NA	NA	NA	NA	TRUE	NA	NA	NA	B	coding	776	2331	122	2452	1000576	988174	FALSE	85	AAAGAAAAAAGAAAAAAAGA	NA	NA	NA	NA	TTTAAA	-37_x000D_
PB.6360.6	LUXX01008409.1	-	3685	9	novel_in_catalog	ENSSSCG00025062486	novel	4329	12	NA	NA	134	2	combination_of_known_splicesites	FALSE	canonical	NA	NA	NA	NA	NA	NA	NA	TRUE	NA	NA	NA	B	coding	625	1878	171	2048	1000576	988988	TRUE	85	AAAGAAAAAAGAAAAAAAGA	NA	NA	NA	NA	TTTAAA	-37_x000D_
PB.6360.9	LUXX01008409.1	-	619	1	incomplete-splice_match	ENSSSCG00025062486	ENSSSCT00025085709	5081	9	13916	283	13916	0	mono-exon	FALSE	NA	NA	NA	NA	NA	NA	NA	NA	NA	NA	NA	NA	B	non_coding	NA	NA	NA	NA	NA	NA	NA	85	ACAAAGAAAAAAGAAAAAAA	NA	NA	NA	NA	TTTAAA	-35_x000D_
PB.7329.1	LUXX01008502.1	-	3019	17	novel_in_catalog	ENSSSCG00025064827	novel	3182	16	NA	NA	41	3	intron_retention	FALSE	canonical	NA	NA	NA	NA	NA	NA	NA	TRUE	NA	NA	NA	B	coding	752	2259	96	2354	105841	52674	FALSE	5	CCTGTGTTGTGTGCACTGTT	NA	NA	NA	NA	AATAAA	-18_x000D_
PB.7329.2	LUXX01008502.1	-	3143	16	novel_in_catalog	ENSSSCG00025064827	novel	3182	16	NA	NA	10	2	intron_retention	FALSE	canonical	NA	NA	NA	NA	NA	NA	NA	TRUE	NA	NA	NA	B	coding	782	2349	136	2484	105931	52674	FALSE	5	AGCGTGCCTGTGTTGTGTGC	NA	NA	NA	NA	AATAAA	-12_x000D_
PB.7329.3	LUXX01008502.1	-	2983	16	novel_in_catalog	ENSSSCG00025064827	novel	3182	16	NA	NA	35	1	intron_retention	FALSE	canonical	NA	NA	NA	NA	NA	NA	NA	TRUE	NA	NA	NA	B	coding	752	2259	67	2325	105841	52674	FALSE	5	CAGCGTGCCTGTGTTGTGTG	NA	NA	NA	NA	AATAAA	-11_x000D_
PB.7330.1	LUXX01008502.1	-	3579	9	novel_in_catalog	ENSSSCG00025064827	novel	3600	10	NA	NA	0	0	intron_retention	TRUE	canonical	NA	NA	NA	NA	NA	NA	NA	TRUE	NA	NA	NA	B	coding	407	1224	208	1431	172459	149911	FALSE	5	CTTCTGCCTGTGGGTGAGGT	NA	NA	NA	NA	AATATA	-33_x000D_
PB.7331.1	LUXX01008502.1	-	2007	1	incomplete-splice_match	ENSSSCG00025066264	ENSSSCT00025091048	6827	10	18803	4721	18710	3	mono-exon	FALSE	NA	NA	NA	NA	NA	NA	NA	NA	NA	NA	NA	NA	A	coding	119	360	47	406	216303	215944	NA	15	CTAGTGTGCATTTCCTGAGG	NA	NA	NA	NA	AATAAA	-16_x000D_
PB.7332.1	LUXX01008502.1	+	1653	5	full-splice_match	ENSSSCG00025066650	ENSSSCT00025091750	1727	5	74	0	74	0	multi-exon	FALSE	canonical	NA	NA	NA	NA	NA	NA	NA	TRUE	NA	NA	NA	C	coding	214	645	93	737	314588	324069	FALSE	25	TATTGTCAACAGTGTTTTAT	NA	NA	NA	NA	AATAAA	-13_x000D_
PB.7332.2	LUXX01008502.1	+	834	5	full-splice_match	ENSSSCG00025066650	ENSSSCT00025091750	1727	5	87	806	87	600	multi-exon	FALSE	canonical	NA	NA	NA	NA	NA	NA	NA	TRUE	NA	NA	NA	C	coding	214	645	80	724	314588	324069	FALSE	35	AAAAATCCTTAGTGTGGACT	NA	NA	NA	NA	ATTAAA	-12_x000D_
PB.7333.1	LUXX01008502.1	+	1102	1	antisense	novelGene_ENSSSCG00025066899_AS	novel	NA	NA	NA	NA	NA	NA	mono-exon	FALSE	NA	NA	NA	NA	NA	NA	NA	NA	NA	NA	NA	NA	B	non_coding	NA	NA	NA	NA	NA	NA	NA	100	AAAAAAAAAAAAAAAAAAAA	NA	NA	NA	NA	AATAAA	-33_x000D_
PB.7334.1	LUXX01008502.1	-	2950	1	genic	ENSSSCG00025066899	novel	NA	NA	NA	NA	3627	1324	mono-exon	FALSE	NA	NA	NA	NA	NA	NA	NA	NA	NA	NA	NA	NA	B	coding	37	114	321	434	327619	327506	NA	30	AATAAGTTGTGAGGTTTTTA	NA	NA	NA	NA	AATAAA	-12_x000D_
PB.7334.2	LUXX01008502.1	-	1861	1	genic	ENSSSCG00025066899	novel	NA	NA	NA	NA	4716	1324	mono-exon	FALSE	NA	NA	NA	NA	NA	NA	NA	NA	NA	NA	NA	NA	B	non_coding	NA	NA	NA	NA	NA	NA	NA	30	AATAAGTTGTGAGGTTTTTA	NA	NA	NA	NA	AATAAA	-12_x000D_
PB.7335.1	LUXX01008502.1	+	1072	1	antisense	novelGene_ENSSSCG00025066899_AS	novel	NA	NA	NA	NA	NA	NA	mono-exon	FALSE	NA	NA	NA	NA	NA	NA	NA	NA	NA	NA	NA	NA	B	non_coding	NA	NA	NA	NA	NA	NA	NA	90	AAAAAAAAAAAAAAAAAATT	NA	NA	NA	NA	NA	NA_x000D_
PB.7336.1	LUXX01008502.1	+	2126	1	antisense	novelGene_ENSSSCG00025066899_AS	novel	NA	NA	NA	NA	NA	NA	mono-exon	FALSE	NA	NA	NA	NA	NA	NA	NA	NA	NA	NA	NA	NA	B	non_coding	NA	NA	NA	NA	NA	NA	NA	95	AAAAAAAAAAAGAAAAAAAA	NA	NA	NA	NA	AAAACA	-44_x000D_
PB.840.1	LUXX01008578.1	+	2046	7	novel_not_in_catalog	ENSSSCG00025000357	novel	1370	8	NA	NA	-16	-1428	at_least_one_novel_splicesite	FALSE	canonical	NA	NA	NA	NA	NA	NA	NA	TRUE	NA	NA	NA	A	coding	318	957	144	1100	306760	332636	FALSE	10	GGTCTGTATCTGTACTGGTC	NA	NA	NA	NA	AATAAA	-18_x000D_
PB.841.1	LUXX01008578.1	-	1954	3	incomplete-splice_match	ENSSSCG00025000669	ENSSSCT00025000803	1854	4	0	-2	0	2	intron_retention	FALSE	canonical	NA	NA	NA	NA	NA	NA	NA	TRUE	NA	NA	NA	A	coding	134	405	244	648	409402	407128	FALSE	40	AAAAATAAAGCTGGTGTCTG	NA	NA	NA	NA	AATAAA	-20_x000D_
PB.842.1	LUXX01008578.1	+	5272	14	novel_not_in_catalog	ENSSSCG00025001159	novel	5315	13	NA	NA	-18	-9	at_least_one_novel_splicesite	FALSE	canonical	NA	NA	NA	NA	NA	NA	NA	TRUE	NA	NA	NA	A	coding	1050	3153	145	3297	656664	679984	FALSE	55	AAAAATTAAACTCATTCATA	NA	NA	NA	NA	AATAAA	-11_x000D_
PB.843.1	LUXX01008578.1	-	1503	5	novel_in_catalog	ENSSSCG00025001325	novel	1451	6	NA	NA	5	5	intron_retention	FALSE	canonical	NA	NA	NA	NA	NA	NA	NA	TRUE	NA	NA	NA	A	coding	226	681	23	703	782578	775227	FALSE	30	CAATTCTTCTTTCAAATCAG	NA	NA	NA	NA	AATAAA	-18_x000D_
PB.844.1	LUXX01008578.1	+	1790	14	full-splice_match	ENSSSCG00025001555	ENSSSCT00025001995	1810	14	20	0	17	0	multi-exon	FALSE	canonical	NA	NA	NA	NA	NA	NA	NA	TRUE	NA	NA	NA	A	coding	426	1281	29	1309	782879	867345	FALSE	40	GAGAAAAAGTTCCTGTTACA	NA	NA	NA	NA	AATAAA	-21_x000D_
PB.845.1	LUXX01008578.1	+	2803	5	full-splice_match	ENSSSCG00025002718	ENSSSCT00025003589	2805	5	4	-2	4	2	multi-exon	FALSE	canonical	NA	NA	NA	NA	NA	NA	NA	TRUE	NA	NA	NA	C	coding	142	429	344	772	1920094	1923933	FALSE	15	AGTTTGGTTTAAGGTCTTTT	NA	NA	NA	NA	AATAAA	-31_x000D_
PB.845.2	LUXX01008578.1	+	2607	4	incomplete-splice_match	ENSSSCG00025002718	ENSSSCT00025003589	2805	5	321	-1	-292	1	5prime_fragment	FALSE	canonical	NA	NA	NA	NA	NA	NA	NA	TRUE	NA	NA	NA	C	coding	142	429	149	577	1920094	1923933	FALSE	20	AAGTTTGGTTTAAGGTCTTT	NA	NA	NA	NA	AATAAA	-30_x000D_
PB.845.3	LUXX01008578.1	+	2521	4	novel_not_in_catalog	ENSSSCG00025002718	novel	3234	4	NA	NA	48	1	intron_retention	FALSE	canonical	NA	NA	NA	NA	NA	NA	NA	TRUE	NA	NA	NA	C	coding	114	345	147	491	1921168	1923933	FALSE	20	AAGTTTGGTTTAAGGTCTTT	NA	NA	NA	NA	AATAAA	-30_x000D_
PB.846.1	LUXX01008578.1	+	2076	1	antisense	novelGene_ENSSSCG00025002864_AS	novel	NA	NA	NA	NA	NA	NA	mono-exon	FALSE	NA	NA	NA	NA	NA	NA	NA	NA	NA	NA	NA	NA	B	non_coding	NA	NA	NA	NA	NA	NA	NA	90	AAAAAGACAAAAAAAAAAAA	NA	NA	NA	NA	NA	NA_x000D_
PB.846.2	LUXX01008578.1	+	737	1	intergenic	novelGene_59	novel	NA	NA	NA	NA	NA	NA	mono-exon	FALSE	NA	NA	NA	NA	NA	NA	NA	NA	NA	NA	NA	NA	A	non_coding	NA	NA	NA	NA	NA	NA	NA	90	AAAAAGACAAAAAAAAAAAA	NA	NA	NA	NA	NA	NA_x000D_
PB.847.1	LUXX01008578.1	+	786	2	antisense	novelGene_ENSSSCG00025002864_AS	novel	NA	NA	NA	NA	NA	NA	multi-exon	FALSE	non_canonical	NA	NA	NA	NA	NA	NA	NA	FALSE	NA	NA	NA	B	non_coding	NA	NA	NA	NA	NA	NA	NA	80	AAAAAGACAAAAGACAAAAA	NA	NA	NA	NA	NA	NA_x000D_
PB.848.1	LUXX01008578.1	+	1577	1	intergenic	novelGene_62	novel	NA	NA	NA	NA	NA	NA	mono-exon	FALSE	NA	NA	NA	NA	NA	NA	NA	NA	NA	NA	NA	NA	A	non_coding	NA	NA	NA	NA	NA	NA	NA	90	AAAAAGACAAAAAAAAAAAA	NA	NA	NA	NA	AAGAAA	-6_x000D_
PB.849.1	LUXX01008578.1	+	2075	1	intergenic	novelGene_64	novel	NA	NA	NA	NA	NA	NA	mono-exon	FALSE	NA	NA	NA	NA	NA	NA	NA	NA	NA	NA	NA	NA	A	non_coding	NA	NA	NA	NA	NA	NA	NA	100	AAAAAAAAAAAAAAAAAAAA	NA	NA	NA	NA	AATAAA	-23_x000D_
PB.849.2	LUXX01008578.1	+	1056	1	intergenic	novelGene_65	novel	NA	NA	NA	NA	NA	NA	mono-exon	FALSE	NA	NA	NA	NA	NA	NA	NA	NA	NA	NA	NA	NA	A	non_coding	NA	NA	NA	NA	NA	NA	NA	100	AAAAAAAAAAAAAAAAAAAA	NA	NA	NA	NA	AATAAA	-23_x000D_
PB.850.10	LUXX01008578.1	-	5064	17	novel_not_in_catalog	ENSSSCG00025002864	novel	5570	18	NA	NA	-2	0	at_least_one_novel_splicesite	FALSE	canonical	NA	NA	NA	NA	NA	NA	NA	TRUE	NA	NA	NA	B	coding	670	2013	325	2337	2028519	1997705	FALSE	30	AAGTCAATTTGTGCTTAATT	NA	NA	NA	NA	AATAAA	-16_x000D_
PB.850.11	LUXX01008578.1	-	4976	16	novel_not_in_catalog	ENSSSCG00025002864	novel	5570	18	NA	NA	-2	0	at_least_one_novel_splicesite	FALSE	canonical	NA	NA	NA	NA	NA	NA	NA	TRUE	NA	NA	NA	B	coding	670	2013	237	2249	2028519	1997705	FALSE	30	AAGTCAATTTGTGCTTAATT	NA	NA	NA	NA	AATAAA	-16_x000D_
PB.850.14	LUXX01008578.1	-	4658	15	novel_in_catalog	ENSSSCG00025002864	novel	5570	18	NA	NA	48	0	combination_of_known_splicesites	FALSE	canonical	NA	NA	NA	NA	NA	NA	NA	TRUE	NA	NA	NA	B	coding	586	1761	171	1931	2027743	1997705	FALSE	30	AAGTCAATTTGTGCTTAATT	NA	NA	NA	NA	AATAAA	-16_x000D_
PB.850.16	LUXX01008578.1	-	4483	14	novel_in_catalog	ENSSSCG00025002864	novel	5570	18	NA	NA	45	0	combination_of_known_splicesites	FALSE	canonical	NA	NA	NA	NA	NA	NA	NA	TRUE	NA	NA	NA	B	coding	465	1398	359	1756	2026673	1997705	FALSE	30	AAGTCAATTTGTGCTTAATT	NA	NA	NA	NA	AATAAA	-16_x000D_
PB.850.19	LUXX01008578.1	-	4226	1	novel_in_catalog	ENSSSCG00025002864	novel	5570	18	NA	NA	72541	0	mono-exon	FALSE	NA	NA	NA	NA	NA	NA	NA	NA	NA	NA	NA	NA	B	non_coding	NA	NA	NA	NA	NA	NA	NA	30	AAGTCAATTTGTGCTTAATT	NA	NA	NA	NA	AATAAA	-16_x000D_
PB.850.3	LUXX01008578.1	-	5813	16	novel_not_in_catalog	ENSSSCG00025002864	novel	5570	18	NA	NA	-2	4	intron_retention	FALSE	canonical	NA	NA	NA	NA	NA	NA	NA	TRUE	NA	NA	NA	B	coding	381	1146	325	1470	2028519	2016034	TRUE	25	CAATTTGTGCTTAATTATGC	NA	NA	NA	NA	AATAAA	-20_x000D_
PB.850.31	LUXX01008578.1	-	5303	17	novel_in_catalog	ENSSSCG00025002864	novel	5570	18	NA	NA	21	-1	combination_of_known_junctions	FALSE	canonical	NA	NA	NA	NA	NA	NA	NA	TRUE	NA	NA	NA	B	coding	670	2013	565	2577	2028519	1997705	FALSE	30	CAAGTCAATTTGTGCTTAAT	NA	NA	NA	NA	AATAAA	-15_x000D_
PB.850.32	LUXX01008578.1	-	5156	15	novel_not_in_catalog	ENSSSCG00025002864	novel	5570	18	NA	NA	48	-487	intron_retention	FALSE	canonical	NA	NA	NA	NA	NA	NA	NA	TRUE	NA	NA	NA	B	coding	381	1146	159	1304	2028519	2016034	TRUE	30	ATTACGTACATTTCTAAGTC	NA	NA	NA	NA	AATAAA	-25_x000D_
PB.850.34	LUXX01008578.1	-	4559	17	novel_not_in_catalog	ENSSSCG00025002864	novel	5570	18	NA	NA	12	-491	at_least_one_novel_splicesite	FALSE	canonical	NA	NA	NA	NA	NA	NA	NA	TRUE	NA	NA	NA	B	coding	670	2013	311	2323	2028519	1997705	FALSE	35	TACAATTACGTACATTTCTA	NA	NA	NA	NA	AATAAA	-21_x000D_
PB.850.36	LUXX01008578.1	-	4484	16	novel_not_in_catalog	ENSSSCG00025002864	novel	5570	18	NA	NA	-2	-492	at_least_one_novel_splicesite	FALSE	canonical	NA	NA	NA	NA	NA	NA	NA	TRUE	NA	NA	NA	B	coding	670	2013	237	2249	2028519	1997705	FALSE	30	CTACAATTACGTACATTTCT	NA	NA	NA	NA	AATAAA	-20_x000D_
PB.850.37	LUXX01008578.1	-	4772	16	novel_in_catalog	ENSSSCG00025002864	novel	5570	18	NA	NA	0	-493	combination_of_known_splicesites	FALSE	canonical	NA	NA	NA	NA	NA	NA	NA	TRUE	NA	NA	NA	B	coding	670	2013	526	2538	2028519	1997705	FALSE	30	CCTACAATTACGTACATTTC	NA	NA	NA	NA	AATAAA	-19_x000D_
PB.850.38	LUXX01008578.1	-	3595	16	novel_not_in_catalog	ENSSSCG00025002864	novel	5570	18	NA	NA	-6	-1357	at_least_one_novel_splicesite	FALSE	canonical	NA	NA	NA	NA	NA	NA	NA	TRUE	NA	NA	NA	B	coding	670	2013	213	2225	2028519	1997705	FALSE	60	AAAAAAAAATTCTTAATACT	NA	NA	NA	NA	NA	NA_x000D_
PB.850.39	LUXX01008578.1	-	3161	16	novel_not_in_catalog	ENSSSCG00025002864	novel	5570	18	NA	NA	48	990	at_least_one_novel_splicesite	FALSE	canonical	NA	NA	NA	NA	NA	NA	NA	TRUE	NA	NA	NA	B	coding	670	2013	159	2171	2028519	1997705	FALSE	15	TAAGATCTGTTCGCTGTTGC	NA	NA	NA	NA	ATTAAA	-14_x000D_
PB.850.4	LUXX01008578.1	-	5023	16	novel_not_in_catalog	ENSSSCG00025002864	novel	5570	18	NA	NA	-2	4	at_least_one_novel_splicesite	FALSE	canonical	NA	NA	NA	NA	NA	NA	NA	TRUE	NA	NA	NA	B	coding	670	2013	280	2292	2028519	1997705	FALSE	25	CAATTTGTGCTTAATTATGC	NA	NA	NA	NA	AATAAA	-20_x000D_
PB.850.40	LUXX01008578.1	-	2952	16	novel_not_in_catalog	ENSSSCG00025002864	novel	5570	18	NA	NA	48	781	at_least_one_novel_splicesite	FALSE	canonical	NA	NA	NA	NA	NA	NA	NA	TRUE	NA	NA	NA	B	coding	670	2013	159	2171	2028519	1997705	FALSE	60	AAAATAAGACTGAAACCAAG	NA	NA	NA	NA	NA	NA_x000D_
PB.850.41	LUXX01008578.1	-	3550	15	novel_in_catalog	ENSSSCG00025002864	novel	5570	18	NA	NA	48	637	intron_retention	FALSE	canonical	NA	NA	NA	NA	NA	NA	NA	TRUE	NA	NA	NA	B	coding	381	1146	156	1301	2028519	2016034	TRUE	60	AAAAAAATACCTAGTAATAT	NA	NA	NA	NA	AATAAA	-17_x000D_
PB.850.42	LUXX01008578.1	-	2899	17	novel_not_in_catalog	ENSSSCG00025002864	novel	5570	18	NA	NA	45	637	at_least_one_novel_splicesite	FALSE	canonical	NA	NA	NA	NA	NA	NA	NA	TRUE	NA	NA	NA	B	coding	670	2013	250	2262	2028519	1997705	FALSE	60	AAAAAAATACCTAGTAATAT	NA	NA	NA	NA	AATAAA	-17_x000D_
PB.850.43	LUXX01008578.1	-	2808	16	novel_not_in_catalog	ENSSSCG00025002864	novel	5570	18	NA	NA	48	637	at_least_one_novel_splicesite	FALSE	canonical	NA	NA	NA	NA	NA	NA	NA	TRUE	NA	NA	NA	B	coding	670	2013	159	2171	2028519	1997705	FALSE	60	AAAAAAATACCTAGTAATAT	NA	NA	NA	NA	AATAAA	-17_x000D_
PB.850.44	LUXX01008578.1	-	2666	16	novel_not_in_catalog	ENSSSCG00025002864	novel	5570	18	NA	NA	-2	417	at_least_one_novel_splicesite	FALSE	canonical	NA	NA	NA	NA	NA	NA	NA	TRUE	NA	NA	NA	B	coding	670	2013	237	2249	2028519	1997705	FALSE	55	AAAAAATTGTATTAACACTA	NA	NA	NA	NA	NA	NA_x000D_
PB.850.45	LUXX01008578.1	-	2538	16	novel_in_catalog	ENSSSCG00025002864	novel	5570	18	NA	NA	-2	292	combination_of_known_splicesites	FALSE	canonical	NA	NA	NA	NA	NA	NA	NA	TRUE	NA	NA	NA	B	coding	670	2013	234	2246	2028519	1997705	FALSE	55	AAAGAAAAATATTTAATGTT	NA	NA	NA	NA	TTTAAA	-30_x000D_
PB.850.49	LUXX01008578.1	-	3040	15	novel_not_in_catalog	ENSSSCG00025002864	novel	5570	18	NA	NA	48	124	intron_retention	FALSE	canonical	NA	NA	NA	NA	NA	NA	NA	TRUE	NA	NA	NA	B	coding	381	1146	159	1304	2028519	2016034	TRUE	70	TAAAAAAAAACCAAAAGTGA	NA	NA	NA	NA	NA	NA_x000D_
PB.850.5	LUXX01008578.1	-	5721	15	novel_not_in_catalog	ENSSSCG00025002864	novel	5570	18	NA	NA	-2	0	intron_retention	FALSE	canonical	NA	NA	NA	NA	NA	NA	NA	TRUE	NA	NA	NA	B	coding	381	1146	237	1382	2028519	2016034	TRUE	30	AAGTCAATTTGTGCTTAATT	NA	NA	NA	NA	AATAAA	-16_x000D_
PB.850.50	LUXX01008578.1	-	2383	17	novel_not_in_catalog	ENSSSCG00025002864	novel	5570	18	NA	NA	48	124	at_least_one_novel_splicesite	FALSE	canonical	NA	NA	NA	NA	NA	NA	NA	TRUE	NA	NA	NA	B	coding	670	2013	247	2259	2028519	1997705	FALSE	70	TAAAAAAAAACCAAAAGTGA	NA	NA	NA	NA	NA	NA_x000D_
PB.850.51	LUXX01008578.1	-	2373	16	novel_not_in_catalog	ENSSSCG00025002864	novel	5570	18	NA	NA	-2	124	at_least_one_novel_splicesite	FALSE	canonical	NA	NA	NA	NA	NA	NA	NA	TRUE	NA	NA	NA	B	coding	670	2013	237	2249	2028519	1997705	FALSE	70	TAAAAAAAAACCAAAAGTGA	NA	NA	NA	NA	NA	NA_x000D_
PB.850.55	LUXX01008578.1	-	3757	8	novel_in_catalog	ENSSSCG00025002864	novel	2170	16	NA	NA	45	-22518	combination_of_known_splicesites	FALSE	canonical	NA	NA	NA	NA	NA	NA	NA	TRUE	NA	NA	NA	B	coding	338	1017	159	1175	2028519	2022805	FALSE	90	AAAAAGCAAAAAAAAAAAAA	NA	NA	NA	NA	NA	NA_x000D_
PB.850.56	LUXX01008578.1	-	3159	1	intergenic	novelGene_60	novel	NA	NA	NA	NA	NA	NA	mono-exon	FALSE	NA	NA	NA	NA	NA	NA	NA	NA	NA	NA	NA	NA	A	non_coding	NA	NA	NA	NA	NA	NA	NA	85	AAAAAAAAAAAAAAAGACAT	NA	NA	NA	NA	NA	NA_x000D_
PB.850.57	LUXX01008578.1	-	4650	3	novel_not_in_catalog	ENSSSCG00025002864	novel	5570	18	NA	NA	48	-38065	at_least_one_novel_splicesite	FALSE	non_canonical	NA	NA	NA	NA	NA	NA	NA	TRUE	NA	NA	NA	B	coding	105	318	2632	2949	2037841	2037524	TRUE	70	AAAAAGCAACAACAACAACA	NA	NA	NA	NA	NA	NA_x000D_
PB.850.58	LUXX01008578.1	-	4703	2	novel_in_catalog	ENSSSCG00025002864	novel	2170	16	NA	NA	48	-38065	combination_of_known_splicesites	FALSE	canonical	NA	NA	NA	NA	NA	NA	NA	TRUE	NA	NA	NA	B	coding	105	318	2632	2949	2037841	2037524	FALSE	70	AAAAAGCAACAACAACAACA	NA	NA	NA	NA	NA	NA_x000D_
PB.850.59	LUXX01008578.1	-	1131	1	intergenic	novelGene_61	novel	NA	NA	NA	NA	NA	NA	mono-exon	FALSE	NA	NA	NA	NA	NA	NA	NA	NA	NA	NA	NA	NA	A	non_coding	NA	NA	NA	NA	NA	NA	NA	70	AAAAAGCAACAACAACAACA	NA	NA	NA	NA	NA	NA_x000D_
PB.850.60	LUXX01008578.1	-	2945	1	intergenic	novelGene_63	novel	NA	NA	NA	NA	NA	NA	mono-exon	FALSE	NA	NA	NA	NA	NA	NA	NA	NA	NA	NA	NA	NA	A	non_coding	NA	NA	NA	NA	NA	NA	NA	60	ATTAAAAAAGAAAAGATGCT	NA	NA	NA	NA	ATTAAA	-7_x000D_
PB.850.61	LUXX01008578.1	-	945	1	novel_in_catalog	ENSSSCG00025002864	novel	5570	18	NA	NA	48	-73047	mono-exon	FALSE	NA	NA	NA	NA	NA	NA	NA	NA	NA	NA	NA	NA	B	non_coding	NA	NA	NA	NA	NA	NA	NA	80	AAAAAAAAAAAAAATCAATC	NA	NA	NA	NA	NA	NA_x000D_
PB.850.8	LUXX01008578.1	-	5189	16	novel_in_catalog	ENSSSCG00025002864	novel	5570	18	NA	NA	48	0	combination_of_known_splicesites	FALSE	canonical	NA	NA	NA	NA	NA	NA	NA	TRUE	NA	NA	NA	B	coding	670	2013	450	2462	2028519	1997705	FALSE	30	AAGTCAATTTGTGCTTAATT	NA	NA	NA	NA	AATAAA	-16_x000D_
PB.850.9	LUXX01008578.1	-	5224	17	novel_not_in_catalog	ENSSSCG00025002864	novel	5570	18	NA	NA	-2	0	at_least_one_novel_splicesite	FALSE	canonical	NA	NA	NA	NA	NA	NA	NA	TRUE	NA	NA	NA	B	coding	670	2013	485	2497	2028519	1997705	FALSE	30	AAGTCAATTTGTGCTTAATT	NA	NA	NA	NA	AATAAA	-16_x000D_
PB.851.1	LUXX01008578.1	-	3164	6	incomplete-splice_match	ENSSSCG00025003059	ENSSSCT00025004033	5445	7	-3	2321	0	1	3prime_fragment	FALSE	canonical	NA	NA	NA	NA	NA	NA	NA	TRUE	NA	NA	NA	A	coding	332	999	15	1013	2654402	2543505	FALSE	100	AAAAAAAAAAAAAAAAAAAA	NA	NA	NA	NA	NA	NA_x000D_
PB.7514.1	LUXX01008611.1	-	2137	13	novel_not_in_catalog	ENSSSCG00025019270	novel	6662	13	NA	NA	10	-3	at_least_one_novel_splicesite	TRUE	canonical	NA	NA	NA	NA	NA	NA	NA	TRUE	NA	NA	NA	B	coding	524	1575	50	1624	68102	45430	FALSE	30	AAAGTTGTGTTTAAATTTTG	NA	NA	NA	NA	ATTAAA	-17_x000D_
PB.7514.2	LUXX01008611.1	-	2059	12	novel_in_catalog	ENSSSCG00025019270	novel	6662	13	NA	NA	-8	-3	combination_of_known_splicesites	FALSE	canonical	NA	NA	NA	NA	NA	NA	NA	TRUE	NA	NA	NA	B	coding	403	1212	335	1546	60744	45430	FALSE	30	AAAGTTGTGTTTAAATTTTG	NA	NA	NA	NA	ATTAAA	-17_x000D_
PB.1987.1	LUXX01008719.1	+	3872	3	novel_in_catalog	ENSSSCG00025020279	novel	1724	4	NA	NA	28	-483	intron_retention	FALSE	canonical	NA	NA	NA	NA	NA	NA	NA	TRUE	NA	NA	NA	A	coding	154	465	1611	2075	584041	584505	FALSE	25	CAGACCATGTGAAGGTCTTT	NA	NA	NA	NA	ATTAAA	-16_x000D_
PB.1988.1	LUXX01008719.1	+	1123	1	novel_in_catalog	ENSSSCG00025020348	novel	1332	3	NA	NA	-3	-1348	mono-exon_by_intron_retention	FALSE	NA	NA	NA	NA	NA	NA	NA	NA	NA	NA	NA	NA	C	coding	149	450	131	580	602017	602466	NA	85	AAAAAAAAAAAAAAAAAGCC	NA	NA	NA	NA	NA	NA_x000D_
PB.1988.2	LUXX01008719.1	+	667	3	full-splice_match	ENSSSCG00025020348	ENSSSCT00025027637	1332	3	20	645	0	-645	multi-exon	FALSE	canonical	NA	NA	NA	NA	NA	NA	NA	TRUE	NA	NA	NA	C	coding	134	405	128	532	602017	602797	TRUE	85	AAAAAAAAAAAAAAAATGGA	NA	NA	NA	NA	NA	NA_x000D_
PB.1989.1	LUXX01008719.1	-	7254	29	novel_in_catalog	ENSSSCG00025020676	novel	7295	30	NA	NA	0	-1	combination_of_known_splicesites	TRUE	canonical	NA	NA	NA	NA	NA	NA	NA	TRUE	NA	NA	NA	B	coding	1752	5259	230	5488	712656	632496	FALSE	25	ACTCTGACTCATGAATTTTT	NA	NA	NA	NA	AATAAA	-14_x000D_
PB.1989.3	LUXX01008719.1	-	2920	1	incomplete-splice_match	ENSSSCG00025020676	ENSSSCT00025028093	7214	28	87804	81	87802	-2	mono-exon	FALSE	NA	NA	NA	NA	NA	NA	NA	NA	NA	NA	NA	NA	B	coding	378	1137	19	1155	633632	632496	NA	25	TACTCTGACTCATGAATTTT	NA	NA	NA	NA	AATAAA	-13_x000D_
PB.1989.4	LUXX01008719.1	-	864	1	incomplete-splice_match	ENSSSCG00025020676	ENSSSCT00025028093	7214	28	89860	81	89858	-2	mono-exon	FALSE	NA	NA	NA	NA	NA	NA	NA	NA	NA	NA	NA	NA	B	non_coding	NA	NA	NA	NA	NA	NA	NA	25	TACTCTGACTCATGAATTTT	NA	NA	NA	NA	AATAAA	-13_x000D_
PB.1989.5	LUXX01008719.1	-	3487	23	incomplete-splice_match	ENSSSCG00025020676	ENSSSCT00025028666	7295	30	-11	23789	0	-23789	3prime_fragment	FALSE	canonical	NA	NA	NA	NA	NA	NA	NA	TRUE	NA	NA	NA	B	coding	1066	3201	230	3430	712656	654581	FALSE	100	AAAAAAAAAAAAAAAAAAAA	NA	NA	NA	NA	ACTAAA	-23_x000D_
PB.1990.1	LUXX01008719.1	+	3257	11	incomplete-splice_match	ENSSSCG00025021414	ENSSSCT00025029278	6389	27	87713	429	69647	-427	5prime_fragment	TRUE	canonical	NA	NA	NA	NA	NA	NA	NA	TRUE	NA	NA	NA	A	coding	154	465	878	1342	1170484	1176850	FALSE	85	AAAAAAAAAAAAGGAAAAGA	NA	NA	NA	NA	NA	NA_x000D_
PB.1991.1	LUXX01008719.1	-	1824	7	novel_in_catalog	ENSSSCG00025021665	novel	1981	8	NA	NA	42	0	combination_of_known_splicesites	FALSE	canonical	NA	NA	NA	NA	NA	NA	NA	TRUE	NA	NA	NA	B	coding	200	603	164	766	1188095	1180261	FALSE	30	TGTCCATTTAAAAGTATTTT	NA	NA	NA	NA	ATTAAA	-17_x000D_
PB.1991.2	LUXX01008719.1	-	1771	7	novel_in_catalog	ENSSSCG00025021665	novel	1909	8	NA	NA	12	-1	combination_of_known_junctions	FALSE	canonical	NA	NA	NA	NA	NA	NA	NA	TRUE	NA	NA	NA	B	coding	200	603	112	714	1188095	1180261	FALSE	35	ATGTCCATTTAAAAGTATTT	NA	NA	NA	NA	ATTAAA	-16_x000D_
PB.1991.3	LUXX01008719.1	-	1574	7	novel_in_catalog	ENSSSCG00025021665	novel	1909	8	NA	NA	-11	-221	combination_of_known_junctions	FALSE	canonical	NA	NA	NA	NA	NA	NA	NA	TRUE	NA	NA	NA	B	coding	200	603	135	737	1188095	1180261	FALSE	85	TAAAAAAAAAAAAAAAAAGG	NA	NA	NA	NA	NA	NA_x000D_
PB.1992.1	LUXX01008719.1	+	3358	1	genic	ENSSSCG00025021971	novel	NA	NA	NA	NA	-4	-33511	mono-exon	FALSE	NA	NA	NA	NA	NA	NA	NA	NA	NA	NA	NA	NA	B	non_coding	NA	NA	NA	NA	NA	NA	NA	80	TAAAAAATAAAATTAAAAAA	NA	NA	NA	NA	NA	NA_x000D_
PB.1992.2	LUXX01008719.1	+	2694	18	novel_in_catalog	ENSSSCG00025021971	novel	2698	19	NA	NA	2	-62	intron_retention	TRUE	canonical	NA	NA	NA	NA	NA	NA	NA	TRUE	NA	NA	NA	B	coding	684	2055	122	2176	1194636	1231303	FALSE	25	AAGGATGCTCATATGTTGTT	NA	NA	NA	NA	NA	NA_x000D_
PB.1992.3	LUXX01008719.1	+	2254	18	novel_in_catalog	ENSSSCG00025021971	novel	2698	19	NA	NA	3	0	combination_of_known_junctions	FALSE	canonical	NA	NA	NA	NA	NA	NA	NA	TRUE	NA	NA	NA	B	coding	684	2055	121	2175	1194636	1231303	FALSE	5	CCTGGGGGCCTCTTTACTCT	NA	NA	NA	NA	AATAAA	-14_x000D_
PB.1993.1	LUXX01008719.1	+	2159	1	novel_in_catalog	ENSSSCG00025022211	novel	4966	8	NA	NA	0	-14049	mono-exon_by_intron_retention	FALSE	NA	NA	NA	NA	NA	NA	NA	NA	NA	NA	NA	NA	B	coding	107	324	14	337	1234631	1234954	NA	85	AAAAAGGAAAAAAAAGAAAA	NA	NA	NA	NA	NA	NA_x000D_
PB.1993.2	LUXX01008719.1	+	1179	6	incomplete-splice_match	ENSSSCG00025022211	ENSSSCT00025030359	1900	8	-4	4507	0	-4420	3prime_fragment	FALSE	canonical	NA	NA	NA	NA	NA	NA	NA	TRUE	NA	NA	NA	B	coding	209	630	193	822	1236233	1246048	FALSE	35	ACATTCAGCTCAGAACCATT	NA	NA	NA	NA	ATTAAA	-16_x000D_
PB.1993.3	LUXX01008719.1	+	1120	6	incomplete-splice_match	ENSSSCG00025022211	ENSSSCT00025030295	4966	8	0	4420	0	-4420	3prime_fragment	FALSE	canonical	NA	NA	NA	NA	NA	NA	NA	TRUE	NA	NA	NA	B	coding	249	750	14	763	1234631	1246048	FALSE	35	ACATTCAGCTCAGAACCATT	NA	NA	NA	NA	ATTAAA	-16_x000D_
PB.1993.4	LUXX01008719.1	+	1001	6	incomplete-splice_match	ENSSSCG00025022211	ENSSSCT00025030359	1900	8	-4	4685	0	-4598	3prime_fragment	FALSE	canonical	NA	NA	NA	NA	NA	NA	NA	TRUE	NA	NA	NA	B	coding	209	630	193	822	1236233	1246048	FALSE	20	AAAGCGTTGTAGCTGGGGCG	NA	NA	NA	NA	AATAAA	-20_x000D_
PB.1994.2	LUXX01008719.1	-	4040	19	full-splice_match	ENSSSCG00025022858	ENSSSCT00025031105	4163	19	123	0	0	0	multi-exon	FALSE	canonical	NA	NA	NA	NA	NA	NA	NA	TRUE	NA	NA	NA	C	coding	830	2493	130	2622	1304704	1247785	FALSE	35	AAAGAAATGGTCTACTGGTT	NA	NA	NA	NA	TATAAA	-14_x000D_
PB.1994.4	LUXX01008719.1	-	3367	19	full-splice_match	ENSSSCG00025022858	ENSSSCT00025031105	4163	19	96	700	-13	-698	multi-exon	FALSE	canonical	NA	NA	NA	NA	NA	NA	NA	TRUE	NA	NA	NA	C	coding	830	2493	157	2649	1304704	1247785	FALSE	35	AATTGACAGAATCCTGCTGA	NA	NA	NA	NA	ATTAAA	-44_x000D_
PB.1994.5	LUXX01008719.1	-	3138	19	full-splice_match	ENSSSCG00025022858	ENSSSCT00025031105	4163	19	103	922	-6	-920	multi-exon	FALSE	canonical	NA	NA	NA	NA	NA	NA	NA	TRUE	NA	NA	NA	C	coding	830	2493	150	2642	1304704	1247785	FALSE	25	CAAATCTGCTTTCTGATGCA	NA	NA	NA	NA	AATAAA	-21_x000D_
PB.1994.6	LUXX01008719.1	-	2962	19	full-splice_match	ENSSSCG00025022858	ENSSSCT00025031105	4163	19	125	1076	0	-1074	multi-exon	FALSE	canonical	NA	NA	NA	NA	NA	NA	NA	TRUE	NA	NA	NA	C	coding	830	2493	128	2620	1304704	1247785	FALSE	20	CACTGATTGTGGAGGTGATC	NA	NA	NA	NA	NA	NA_x000D_
PB.1995.1	LUXX01008719.1	-	1851	6	novel_in_catalog	ENSSSCG00025023214	novel	1807	7	NA	NA	19	0	intron_retention	FALSE	canonical	NA	NA	NA	NA	NA	NA	NA	TRUE	NA	NA	NA	B	coding	245	738	122	859	1360885	1328213	FALSE	20	ATTTACTATGGCTTTGTCAC	NA	NA	NA	NA	AATAAA	-18_x000D_
PB.1995.3	LUXX01008719.1	-	1509	6	novel_in_catalog	ENSSSCG00025023214	novel	1807	7	NA	NA	19	-335	intron_retention	FALSE	canonical	NA	NA	NA	NA	NA	NA	NA	TRUE	NA	NA	NA	B	coding	245	738	122	859	1360885	1328213	FALSE	10	TGCCTTTGTAGTTCTGGTAT	NA	NA	NA	NA	AATAAA	-18_x000D_
PB.1996.1	LUXX01008719.1	+	1840	15	full-splice_match	ENSSSCG00025023603	ENSSSCT00025031976	2391	15	-19	570	-19	-570	multi-exon	FALSE	canonical	NA	NA	NA	NA	NA	NA	NA	TRUE	NA	NA	NA	A	coding	589	1770	70	1839	1512800	1574187	FALSE	65	AAAGAACAAATGGAAAAATT	NA	NA	NA	NA	AAAAAG	-6_x000D_
PB.1997.1	LUXX01008719.1	+	3301	11	novel_not_in_catalog	ENSSSCG00025024908	novel	7762	12	NA	NA	-1519	1406	at_least_one_novel_splicesite	FALSE	canonical	NA	NA	NA	NA	NA	NA	NA	TRUE	NA	NA	NA	B	coding	389	1170	261	1430	1737715	1743544	FALSE	40	ATTAAAATTTGCATTCCAAT	NA	NA	NA	NA	AATAAA	-24_x000D_
PB.1997.2	LUXX01008719.1	+	3083	10	incomplete-splice_match	ENSSSCG00025024908	ENSSSCT00025033631	1794	11	481	-1397	0	1397	5prime_fragment	FALSE	canonical	NA	NA	NA	NA	NA	NA	NA	TRUE	NA	NA	NA	B	coding	389	1170	52	1221	1737715	1743544	FALSE	30	AGTCCCTTGATTAAAATTTG	NA	NA	NA	NA	AATAAA	-15_x000D_
PB.1997.3	LUXX01008719.1	+	1682	10	incomplete-splice_match	ENSSSCG00025024908	ENSSSCT00025033631	1794	11	481	4	0	-4	5prime_fragment	FALSE	canonical	NA	NA	NA	NA	NA	NA	NA	TRUE	NA	NA	NA	B	coding	389	1170	52	1221	1737715	1743544	FALSE	40	AAAACCTTGATTTCACCTAA	NA	NA	NA	NA	AATAAA	-24_x000D_
PB.1997.4	LUXX01008719.1	+	2872	10	incomplete-splice_match	ENSSSCG00025024908	ENSSSCT00025033631	1794	11	485	-1190	-3	1190	5prime_fragment	FALSE	canonical	NA	NA	NA	NA	NA	NA	NA	TRUE	NA	NA	NA	B	coding	389	1170	48	1217	1737715	1743544	FALSE	30	AATTGTCAGGTACAGGTGGA	NA	NA	NA	NA	AATAAA	-18_x000D_
PB.1998.1	LUXX01008719.1	+	1779	5	full-splice_match	ENSSSCG00025000252	ENSSSCT00025000346	1828	5	51	-2	51	2	multi-exon	FALSE	canonical	NA	NA	NA	NA	NA	NA	NA	TRUE	NA	NA	NA	A	coding	193	582	390	971	1990852	1993811	FALSE	10	ACTGTCTGAGTTTTGTGTTG	NA	NA	NA	NA	AATAAA	-4_x000D_
PB.1999.1	LUXX01008719.1	-	1911	12	incomplete-splice_match	ENSSSCG00025000371	ENSSSCT00025000465	1980	13	8790	2	8790	-2	5prime_fragment	FALSE	canonical	NA	NA	NA	NA	NA	NA	NA	TRUE	NA	NA	NA	A	coding	461	1386	194	1579	2012260	2006691	FALSE	45	AAATAATTAGGCATTGAGGA	NA	NA	NA	NA	AATAAA	-9_x000D_
PB.2000.1	LUXX01008719.1	-	2802	21	full-splice_match	ENSSSCG00025000604	ENSSSCT00025000730	3127	21	11	314	-4	-314	multi-exon	FALSE	canonical	NA	NA	NA	NA	NA	NA	NA	TRUE	NA	NA	NA	A	coding	688	2067	136	2202	2241481	2146313	FALSE	40	AATAGCTTCTTGGAAAGAGA	NA	NA	NA	NA	AATAAA	-13_x000D_
PB.2001.1	LUXX01008719.1	-	2312	13	novel_in_catalog	ENSSSCG00025001330	novel	2095	14	NA	NA	-7	146	intron_retention	FALSE	canonical	NA	NA	NA	NA	NA	NA	NA	TRUE	NA	NA	NA	B	coding	440	1323	63	1385	2351692	2329535	FALSE	15	GATTTTCGTGAGCAGTTTCT	NA	NA	NA	NA	AATAAA	-14_x000D_
PB.2001.2	LUXX01008719.1	-	1813	13	novel_in_catalog	ENSSSCG00025001330	novel	1715	14	NA	NA	-10	31	intron_retention	FALSE	canonical	NA	NA	NA	NA	NA	NA	NA	TRUE	NA	NA	NA	B	coding	440	1323	66	1388	2351692	2329535	FALSE	25	TAAACGCGGAGTCCAGTGTG	NA	NA	NA	NA	AATAAA	-25_x000D_
PB.2002.1	LUXX01008719.1	+	1739	7	full-splice_match	ENSSSCG00025001920	ENSSSCT00025002465	1803	7	62	2	62	-2	multi-exon	FALSE	canonical	NA	NA	NA	NA	NA	NA	NA	TRUE	NA	NA	NA	C	coding	202	609	105	713	2597343	2608606	FALSE	30	TGCTTAGTCTTAAAACTCAG	NA	NA	NA	NA	AATAAA	-19_x000D_
PB.2002.2	LUXX01008719.1	+	2055	2	incomplete-splice_match	ENSSSCG00025001920	ENSSSCT00025002486	733	6	65	6327	65	-6327	intron_retention	FALSE	canonical	NA	NA	NA	NA	NA	NA	NA	TRUE	NA	NA	NA	C	coding	133	402	102	503	2597343	2600727	FALSE	90	AAAAAAAAAAAAAAAAAGAG	NA	NA	NA	NA	NA	NA_x000D_
PB.2003.1	LUXX01008719.1	-	3380	19	incomplete-splice_match	ENSSSCG00025002381	ENSSSCT00025003387	7725	34	49273	1158	41083	6	5prime_fragment	FALSE	canonical	NA	NA	NA	NA	NA	NA	NA	TRUE	NA	NA	NA	A	coding	722	2169	403	2571	2644096	2614432	FALSE	90	AAAAAAAAAACAAACAAAAA	NA	NA	NA	NA	NA	NA_x000D_
PB.2004.1	LUXX01008719.1	+	4229	21	novel_in_catalog	ENSSSCG00025003384	novel	5086	24	NA	NA	-40	-15	combination_of_known_junctions	FALSE	canonical	NA	NA	NA	NA	NA	NA	NA	TRUE	NA	NA	NA	B	coding	930	2793	169	2961	3106508	3164782	FALSE	70	TAAAAAAAAAAAAAAGTGCT	NA	NA	NA	NA	AAAACA	-10_x000D_
PB.2004.2	LUXX01008719.1	+	4079	20	novel_in_catalog	ENSSSCG00025003384	novel	4174	21	NA	NA	-14	-31	combination_of_known_junctions	FALSE	canonical	NA	NA	NA	NA	NA	NA	NA	TRUE	NA	NA	NA	B	coding	894	2685	143	2827	3106508	3164782	FALSE	50	AAAAACATTATTTTGGTAAA	NA	NA	NA	NA	ATTAAA	-31_x000D_
PB.2004.3	LUXX01008719.1	+	3874	20	novel_in_catalog	ENSSSCG00025003384	novel	4174	21	NA	NA	-14	-236	combination_of_known_junctions	FALSE	canonical	NA	NA	NA	NA	NA	NA	NA	TRUE	NA	NA	NA	B	coding	894	2685	143	2827	3106508	3164782	FALSE	35	AAAAAGCCTTATTCTGTACT	NA	NA	NA	NA	ATTAAA	-22_x000D_
PB.2005.1	LUXX01008719.1	+	3687	5	novel_not_in_catalog	ENSSSCG00025003919	novel	3655	5	NA	NA	-29	-4	at_least_one_novel_splicesite	FALSE	non_canonical	NA	NA	NA	NA	NA	NA	NA	TRUE	NA	NA	NA	A	coding	343	1032	632	1663	3913555	3935615	FALSE	20	TAAACTCGTGGGGTCTGGCA	NA	NA	NA	NA	AATAAA	-17_x000D_
PB.6635.1	LUXX01008933.1	-	2409	3	incomplete-splice_match	ENSSSCG00025007817	ENSSSCT00025010397	2854	7	8029	16	8029	0	5prime_fragment	FALSE	canonical	NA	NA	NA	NA	NA	NA	NA	TRUE	NA	NA	NA	A	coding	128	387	56	442	464341	452947	FALSE	80	AAAAAGACAAAAAAAAGAAG	NA	NA	NA	NA	NA	NA_x000D_
PB.4956.15	LUXX01008969.1	-	7017	53	novel_not_in_catalog	ENSSSCG00025008381	novel	6908	55	NA	NA	-28	1	at_least_one_novel_splicesite	TRUE	non_canonical	NA	NA	NA	NA	NA	NA	NA	TRUE	NA	NA	NA	B	coding	1440	4323	330	4652	590370	449959	TRUE	15	GACACACTCCTGTTTCTTGT	NA	NA	NA	NA	AATAAA	-15_x000D_
PB.4956.16	LUXX01008969.1	-	6794	53	novel_not_in_catalog	ENSSSCG00025008381	novel	6908	55	NA	NA	46	1	at_least_one_novel_splicesite	FALSE	non_canonical	NA	NA	NA	NA	NA	NA	NA	TRUE	NA	NA	NA	B	coding	1443	4332	98	4429	590370	449959	TRUE	15	GACACACTCCTGTTTCTTGT	NA	NA	NA	NA	AATAAA	-15_x000D_
PB.4956.8	LUXX01008969.1	-	4025	28	novel_not_in_catalog	ENSSSCG00025008381	novel	7153	53	NA	NA	39	2	at_least_one_novel_splicesite	FALSE	non_canonical	NA	NA	NA	NA	NA	NA	NA	TRUE	NA	NA	NA	B	coding	457	1374	2134	3507	441623	420908	FALSE	20	ACACACTCCTGTTTCTTGTA	NA	NA	NA	NA	AATAAA	-16_x000D_
PB.4957.1	LUXX01008969.1	+	3504	3	incomplete-splice_match	ENSSSCG00025000870	ENSSSCT00025001044	3471	4	-50	218	-50	-218	intron_retention	TRUE	canonical	NA	NA	NA	NA	NA	NA	NA	TRUE	NA	NA	NA	A	coding	366	1101	90	1190	983587	991057	FALSE	40	AAAGAAAACTGTATTTTGGT	NA	NA	NA	NA	AATAAA	-10_x000D_
PB.4958.1	LUXX01008969.1	-	2752	21	full-splice_match	ENSSSCG00025001453	ENSSSCT00025001850	4216	21	-71	1535	-71	-1535	multi-exon	TRUE	canonical	NA	NA	NA	NA	NA	NA	NA	TRUE	NA	NA	NA	A	coding	799	2400	124	2523	1453720	1418965	FALSE	50	CAATGGAAATAACATTCTAA	NA	NA	NA	NA	AATAAA	-20_x000D_
PB.4959.1	LUXX01008969.1	+	1411	5	incomplete-splice_match	ENSSSCG00025001578	ENSSSCT00025001981	5065	13	-38	19839	-38	-19839	3prime_fragment	FALSE	canonical	NA	NA	NA	NA	NA	NA	NA	TRUE	NA	NA	NA	A	coding	424	1272	140	1411	1477495	1548657	FALSE	80	AAAAGAAAAAAAATAATGAA	NA	NA	NA	NA	ATTAAA	-10_x000D_
PB.3814.1	LUXX01008997.1	+	4104	17	full-splice_match	ENSSSCG00025002190	ENSSSCT00025002832	6038	17	23	1911	-4	-81	multi-exon	FALSE	non_canonical	NA	NA	NA	NA	NA	NA	NA	TRUE	NA	NA	NA	A	coding	939	2820	48	2867	171066	211957	FALSE	30	AATTGAAAGTGTATTTTTGG	NA	NA	NA	NA	AATAAA	-31_x000D_
PB.3815.1	LUXX01008997.1	+	2433	14	novel_not_in_catalog	ENSSSCG00025002256	novel	5823	18	NA	NA	-16	-7321	intron_retention	FALSE	canonical	NA	NA	NA	NA	NA	NA	NA	TRUE	NA	NA	NA	A	coding	559	1680	138	1817	222838	246170	FALSE	20	ATTTTGTTGTATTATTTTAT	NA	NA	NA	NA	NA	NA_x000D_
PB.3816.1	LUXX01008997.1	-	2987	11	incomplete-splice_match	ENSSSCG00025002452	ENSSSCT00025003174	4838	12	389	1566	-75	-1566	3prime_fragment	FALSE	canonical	NA	NA	NA	NA	NA	NA	NA	TRUE	NA	NA	NA	A	coding	872	2619	68	2686	783435	584729	FALSE	90	AAAAAAAAAACAAAAACAAA	NA	NA	NA	NA	NA	NA_x000D_
PB.3817.1	LUXX01008997.1	+	2394	26	novel_in_catalog	ENSSSCG00025002814	novel	7523	45	NA	NA	-6	-1995	combination_of_known_junctions	FALSE	canonical	NA	NA	NA	NA	NA	NA	NA	TRUE	NA	NA	NA	B	coding	764	2292	103	2394	883585	945221	FALSE	75	AAAGAAGACAAAAAAATGAA	NA	NA	NA	NA	NA	NA_x000D_
PB.3817.2	LUXX01008997.1	+	3606	33	novel_in_catalog	ENSSSCG00025002814	novel	7523	45	NA	NA	15	14341	combination_of_known_junctions	FALSE	canonical	NA	NA	NA	NA	NA	NA	NA	TRUE	NA	NA	NA	B	coding	1175	3525	82	3606	883585	961557	FALSE	75	AAGAAAAAGAGAAAGAAGAA	NA	NA	NA	NA	AAGAAA	-16_x000D_
PB.3818.1	LUXX01008997.1	+	3815	14	incomplete-splice_match	ENSSSCG00025002814	ENSSSCT00025003902	11105	45	81736	-1	81736	1	5prime_fragment	FALSE	canonical	NA	NA	NA	NA	NA	NA	NA	TRUE	NA	NA	NA	B	coding	646	1941	463	2403	962044	998589	FALSE	25	AAAATGATCTGTTTCCTGTC	NA	NA	NA	NA	AATAAA	-10_x000D_
PB.3819.1	LUXX01008997.1	-	2785	8	novel_in_catalog	ENSSSCG00025003246	novel	6058	8	NA	NA	-24	-15	combination_of_known_junctions	FALSE	canonical	NA	NA	NA	NA	NA	NA	NA	TRUE	NA	NA	NA	B	coding	297	894	65	958	1104320	1052703	FALSE	75	AAAAAAAAAAAAAAAGCTGG	NA	NA	NA	NA	AGTAAA	-25_x000D_
PB.3819.2	LUXX01008997.1	-	2149	8	novel_in_catalog	ENSSSCG00025003246	novel	6058	8	NA	NA	-24	-651	combination_of_known_junctions	FALSE	canonical	NA	NA	NA	NA	NA	NA	NA	TRUE	NA	NA	NA	B	coding	297	894	65	958	1104320	1052703	FALSE	20	TTTCATGTGCACGTGACATT	NA	NA	NA	NA	AATACA	-20_x000D_
PB.3820.1	LUXX01008997.1	-	2202	1	antisense	novelGene_ENSSSCG00025003523_AS	novel	NA	NA	NA	NA	NA	NA	mono-exon	FALSE	NA	NA	NA	NA	NA	NA	NA	NA	NA	NA	NA	NA	A	non_coding	NA	NA	NA	NA	NA	NA	NA	65	GGCAGAAAGACCAAAAAAAA	NA	NA	NA	NA	AAGAAA	-2_x000D_
PB.6856.1	LUXX01009195.1	-	4280	23	novel_in_catalog	ENSSSCG00025004415	novel	5768	23	NA	NA	-8	2	combination_of_known_junctions	TRUE	canonical	NA	NA	NA	NA	NA	NA	NA	TRUE	NA	NA	NA	A	coding	1279	3840	259	4098	82583	38558	FALSE	25	ATCAGCTAGAGGCTTTGTGA	NA	NA	NA	NA	ATTAAA	-17_x000D_
PB.6857.1	LUXX01009195.1	-	1187	7	incomplete-splice_match	ENSSSCG00025004489	ENSSSCT00025006024	2953	8	3	4613	3	-1805	3prime_fragment	FALSE	canonical	NA	NA	NA	NA	NA	NA	NA	TRUE	NA	NA	NA	A	coding	266	801	99	899	126184	115141	FALSE	0	CGTTTTTGGTTGTTGTGCCT	NA	NA	NA	NA	TATAAA	-22_x000D_
PB.6858.1	LUXX01009195.1	+	965	1	intergenic	novelGene_521	novel	NA	NA	NA	NA	NA	NA	mono-exon	FALSE	NA	NA	NA	NA	NA	NA	NA	NA	NA	NA	NA	NA	A	non_coding	NA	NA	NA	NA	NA	NA	NA	100	AAAAAAAAAAAAAAAAAAAA	NA	NA	NA	NA	NA	NA_x000D_
PB.6859.1	LUXX01009195.1	+	4066	24	full-splice_match	ENSSSCG00025004651	ENSSSCT00025006299	4030	24	-35	-1	-11	1	multi-exon	FALSE	canonical	NA	NA	NA	NA	NA	NA	NA	TRUE	NA	NA	NA	C	coding	1221	3666	329	3994	389805	417235	FALSE	20	AGCATCGCTATCCACTGGGG	NA	NA	NA	NA	AATAAA	-20_x000D_
PB.6859.2	LUXX01009195.1	+	3950	23	novel_in_catalog	ENSSSCG00025004651	novel	4030	24	NA	NA	-11	1	combination_of_known_junctions	FALSE	canonical	NA	NA	NA	NA	NA	NA	NA	TRUE	NA	NA	NA	C	coding	1194	3585	294	3878	390780	417235	FALSE	20	AGCATCGCTATCCACTGGGG	NA	NA	NA	NA	AATAAA	-20_x000D_
PB.6859.3	LUXX01009195.1	+	3870	23	novel_in_catalog	ENSSSCG00025004651	novel	4030	24	NA	NA	-9	1	combination_of_known_junctions	FALSE	canonical	NA	NA	NA	NA	NA	NA	NA	TRUE	NA	NA	NA	C	coding	1155	3468	331	3798	397830	417235	FALSE	20	AGCATCGCTATCCACTGGGG	NA	NA	NA	NA	AATAAA	-20_x000D_
PB.6859.4	LUXX01009195.1	+	3914	22	novel_in_catalog	ENSSSCG00025004651	novel	4030	24	NA	NA	4	0	combination_of_known_junctions	FALSE	canonical	NA	NA	NA	NA	NA	NA	NA	TRUE	NA	NA	NA	C	coding	1194	3585	259	3843	390780	417235	FALSE	20	GAGCATCGCTATCCACTGGG	NA	NA	NA	NA	AATAAA	-19_x000D_
PB.6859.5	LUXX01009195.1	+	3808	22	novel_in_catalog	ENSSSCG00025004651	novel	4159	23	NA	NA	-2	0	combination_of_known_junctions	FALSE	canonical	NA	NA	NA	NA	NA	NA	NA	TRUE	NA	NA	NA	C	coding	1194	3585	154	3738	390780	417235	FALSE	20	TGAGCATCGCTATCCACTGG	NA	NA	NA	NA	AATAAA	-18_x000D_
PB.6859.6	LUXX01009195.1	+	3991	23	novel_in_catalog	ENSSSCG00025004651	novel	4030	24	NA	NA	4	1	combination_of_known_junctions	FALSE	canonical	NA	NA	NA	NA	NA	NA	NA	TRUE	NA	NA	NA	C	coding	1194	3585	338	3922	390780	417235	FALSE	20	GTGAGCATCGCTATCCACTG	NA	NA	NA	NA	AATAAA	-17_x000D_
PB.6860.1	LUXX01009195.1	-	5578	19	novel_not_in_catalog	ENSSSCG00025004755	novel	9041	21	NA	NA	-7	-1	at_least_one_novel_splicesite	TRUE	canonical	NA	NA	NA	NA	NA	NA	NA	TRUE	NA	NA	NA	B	coding	1098	3297	118	3414	529283	420016	FALSE	15	ACAGGCCTTGTCTTCTGTAT	NA	NA	NA	NA	AATAAA	-16_x000D_
PB.6860.3	LUXX01009195.1	-	5667	19	novel_in_catalog	ENSSSCG00025004755	novel	9041	21	NA	NA	-4	1	combination_of_known_junctions	FALSE	canonical	NA	NA	NA	NA	NA	NA	NA	TRUE	NA	NA	NA	B	coding	1123	3372	133	3504	529283	420016	FALSE	15	TACAGGCCTTGTCTTCTGTA	NA	NA	NA	NA	AATAAA	-15_x000D_
PB.6860.5	LUXX01009195.1	-	4955	19	novel_in_catalog	ENSSSCG00025004755	novel	9041	21	NA	NA	8	-694	combination_of_known_junctions	FALSE	canonical	NA	NA	NA	NA	NA	NA	NA	TRUE	NA	NA	NA	B	coding	1123	3372	121	3492	529283	420016	FALSE	45	AAAACATAACAGTTTGTAGT	NA	NA	NA	NA	AATAAA	-6_x000D_
PB.6860.6	LUXX01009195.1	-	4847	19	novel_in_catalog	ENSSSCG00025004755	novel	8906	20	NA	NA	0	-694	combination_of_known_junctions	FALSE	canonical	NA	NA	NA	NA	NA	NA	NA	TRUE	NA	NA	NA	B	coding	1122	3369	111	3479	529283	419921	FALSE	45	AAAACATAACAGTTTGTAGT	NA	NA	NA	NA	AATAAA	-6_x000D_
PB.6860.7	LUXX01009195.1	-	4769	19	novel_not_in_catalog	ENSSSCG00025004755	novel	8906	20	NA	NA	3	-694	at_least_one_novel_splicesite	FALSE	canonical	NA	NA	NA	NA	NA	NA	NA	TRUE	NA	NA	NA	B	coding	1097	3294	108	3401	529283	419921	FALSE	45	AAAACATAACAGTTTGTAGT	NA	NA	NA	NA	AATAAA	-6_x000D_
PB.6298.1	LUXX01009343.1	+	1344	2	incomplete-splice_match	ENSSSCG00025011447	ENSSSCT00025015956	2499	7	-73	25820	-73	-25820	3prime_fragment	FALSE	canonical	NA	NA	NA	NA	NA	NA	NA	TRUE	NA	NA	NA	A	non_coding	NA	NA	NA	NA	NA	NA	NA	35	AATAATATGATATTTGTCTT	NA	NA	NA	NA	NA	NA_x000D_
PB.6299.1	LUXX01009343.1	+	2775	5	novel_not_in_catalog	ENSSSCG00025013149	novel	3661	5	NA	NA	7	6	at_least_one_novel_splicesite	FALSE	canonical	NA	NA	NA	NA	NA	NA	NA	TRUE	NA	NA	NA	B	coding	383	1152	726	1877	231596	233310	TRUE	10	TTCCTGTTTTTCAGTTTTAT	NA	NA	NA	NA	AATAAA	-17_x000D_
PB.6299.2	LUXX01009343.1	+	3319	4	novel_in_catalog	ENSSSCG00025013149	novel	3661	5	NA	NA	-4	5	intron_retention	FALSE	canonical	NA	NA	NA	NA	NA	NA	NA	TRUE	NA	NA	NA	B	coding	409	1230	708	1937	231596	232825	TRUE	10	CTTCCTGTTTTTCAGTTTTA	NA	NA	NA	NA	AATAAA	-16_x000D_
PB.6299.3	LUXX01009343.1	+	2892	3	incomplete-splice_match	ENSSSCG00025013149	ENSSSCT00025017972	3661	5	29	3490	0	-3082	intron_retention	FALSE	canonical	NA	NA	NA	NA	NA	NA	NA	TRUE	NA	NA	NA	B	coding	409	1230	704	1933	231596	232825	FALSE	65	AACAAAAAATCTGAAAAATC	NA	NA	NA	NA	NA	NA_x000D_
PB.6300.1	LUXX01009343.1	-	3532	5	novel_not_in_catalog	ENSSSCG00025017426	novel	3889	10	NA	NA	42512	1583	intron_retention	FALSE	canonical	NA	NA	NA	NA	NA	NA	NA	TRUE	NA	NA	NA	B	coding	519	1560	510	2069	417651	407914	FALSE	70	AAAAAGAAAAAATTCAAGCA	NA	NA	NA	NA	AAAAAG	-11_x000D_
PB.6301.1	LUXX01009343.1	-	3690	7	novel_in_catalog	ENSSSCG00025017426	novel	1750	9	NA	NA	15	7	intron_retention	FALSE	canonical	NA	NA	NA	NA	NA	NA	NA	TRUE	NA	NA	NA	B	coding	646	1941	539	2479	474398	452408	FALSE	25	AATGGTGATATCGATGTCTT	NA	NA	NA	NA	AATAAA	-19_x000D_
PB.6302.1	LUXX01009343.1	+	2633	1	novel_in_catalog	ENSSSCG00025018978	novel	2669	5	NA	NA	-20	-21394	mono-exon	FALSE	NA	NA	NA	NA	NA	NA	NA	NA	NA	NA	NA	NA	A	coding	71	216	112	327	662143	662358	NA	70	AAGAAGAAAAATAAACCAAG	NA	NA	NA	NA	AAAAAG	-29_x000D_
PB.6303.1	LUXX01009343.1	-	3164	6	full-splice_match	ENSSSCG00025019257	ENSSSCT00025026095	8481	6	3	5314	0	-1092	multi-exon	FALSE	canonical	NA	NA	NA	NA	NA	NA	NA	TRUE	NA	NA	NA	A	coding	687	2064	350	2413	781896	734234	FALSE	65	AAAAAAGAAAAAATATTTTC	NA	NA	NA	NA	NA	NA_x000D_
PB.6304.1	LUXX01009343.1	+	4213	5	full-splice_match	ENSSSCG00025019339	ENSSSCT00025026233	5580	5	-35	1402	3	1082	multi-exon	FALSE	canonical	NA	NA	NA	NA	NA	NA	NA	TRUE	NA	NA	NA	A	coding	536	1611	232	1842	800105	822621	FALSE	15	TAATGTTTGCTTTTGTCAGT	NA	NA	NA	NA	ATTAAA	-13_x000D_
PB.5261.1	LUXX01009468.1	-	4289	30	full-splice_match	ENSSSCG00025019963	ENSSSCT00025027164	5062	30	-9	782	-3	1	multi-exon	FALSE	canonical	NA	NA	NA	NA	NA	NA	NA	TRUE	NA	NA	NA	C	coding	975	2928	169	3096	389783	201388	FALSE	35	AAAGATACCTCACCTTTGAT	NA	NA	NA	NA	ATTAAA	-7_x000D_
PB.5261.2	LUXX01009468.1	-	3248	30	full-splice_match	ENSSSCG00025019963	ENSSSCT00025027164	5062	30	-7	1821	-1	-1038	multi-exon	FALSE	canonical	NA	NA	NA	NA	NA	NA	NA	TRUE	NA	NA	NA	C	coding	975	2928	167	3094	389783	201388	FALSE	50	AAACCTATTCCTCAAAACAA	NA	NA	NA	NA	AATAAA	-27_x000D_
PB.5261.3	LUXX01009468.1	-	2936	12	incomplete-splice_match	ENSSSCG00025019963	ENSSSCT00025027627	3272	30	-2	138030	0	-123401	3prime_fragment	FALSE	canonical	NA	NA	NA	NA	NA	NA	NA	TRUE	NA	NA	NA	C	coding	410	1233	160	1392	389783	342798	FALSE	90	AAAAAAAGAAAAAAATAAAA	NA	NA	NA	NA	NA	NA_x000D_
PB.5262.1	LUXX01009468.1	+	2391	12	incomplete-splice_match	ENSSSCG00025020568	ENSSSCT00025027967	1794	13	-12	-195	-12	195	intron_retention	TRUE	canonical	NA	NA	NA	NA	NA	NA	NA	TRUE	NA	NA	NA	B	coding	313	942	152	1093	423949	435619	FALSE	15	TATTTGGCTTTCTTTATACC	NA	NA	NA	NA	AATAAA	-15_x000D_
PB.5262.2	LUXX01009468.1	+	1545	12	incomplete-splice_match	ENSSSCG00025020568	ENSSSCT00025027967	1794	13	17	622	-16	0	3prime_fragment	FALSE	canonical	NA	NA	NA	NA	NA	NA	NA	TRUE	NA	NA	NA	B	coding	313	942	123	1064	423949	435619	FALSE	10	TATTTTGCTTCTCTCATTCT	NA	NA	NA	NA	AGTAAA	-21_x000D_
PB.5262.3	LUXX01009468.1	+	1535	10	incomplete-splice_match	ENSSSCG00025020568	ENSSSCT00025027935	1038	12	91	-427	-16	427	intron_retention	FALSE	canonical	NA	NA	NA	NA	NA	NA	NA	TRUE	NA	NA	NA	B	coding	291	876	123	998	423949	432631	FALSE	45	AAAAACAAATTTTCTTTGTA	NA	NA	NA	NA	AATAAA	-13_x000D_
PB.5263.1	LUXX01009468.1	-	3248	20	incomplete-splice_match	ENSSSCG00025020820	ENSSSCT00025028484	7836	21	-31	6059	-31	-2302	3prime_fragment	FALSE	canonical	NA	NA	NA	NA	NA	NA	NA	TRUE	NA	NA	NA	B	coding	706	2121	288	2408	518038	439417	FALSE	45	AATACATATATATACAGTGT	NA	NA	NA	NA	AATAAA	-38_x000D_
PB.5263.2	LUXX01009468.1	-	2890	20	novel_not_in_catalog	ENSSSCG00025020820	novel	7836	21	NA	NA	227	-2345	at_least_one_novel_splicesite	FALSE	canonical	NA	NA	NA	NA	NA	NA	NA	TRUE	NA	NA	NA	B	coding	687	2064	30	2093	518038	439417	FALSE	65	AATAAAAAGTAATAAAATTC	NA	NA	NA	NA	TATAAA	-14_x000D_
PB.5264.1	LUXX01009468.1	-	1874	1	intergenic	novelGene_417	novel	NA	NA	NA	NA	NA	NA	mono-exon	FALSE	NA	NA	NA	NA	NA	NA	NA	NA	NA	NA	NA	NA	A	non_coding	NA	NA	NA	NA	NA	NA	NA	70	AAAATAAAACCTTAAAAAAG	NA	NA	NA	NA	AAGAAA	-14_x000D_
PB.5265.1	LUXX01009468.1	+	1605	1	intergenic	novelGene_418	novel	NA	NA	NA	NA	NA	NA	mono-exon	FALSE	NA	NA	NA	NA	NA	NA	NA	NA	NA	NA	NA	NA	A	non_coding	NA	NA	NA	NA	NA	NA	NA	100	AAAAAAAAAAAAAAAAAAAA	NA	NA	NA	NA	NA	NA_x000D_
PB.3523.1	LUXX01009493.1	-	5397	11	novel_not_in_catalog	ENSSSCG00025006714	novel	5362	11	NA	NA	14872	1	at_least_one_novel_splicesite	TRUE	canonical	NA	NA	NA	NA	NA	NA	NA	TRUE	NA	NA	NA	B	coding	523	1572	66	1637	2700734	2605860	FALSE	30	AAAGAGCATGTCTCTTATCT	NA	NA	NA	NA	AATAAA	-22_x000D_
PB.3523.10	LUXX01009493.1	-	2058	2	intergenic	novelGene_274	novel	NA	NA	NA	NA	NA	NA	multi-exon	FALSE	non_canonical	NA	NA	NA	NA	NA	NA	NA	FALSE	NA	NA	NA	A	non_coding	NA	NA	NA	NA	NA	NA	NA	90	AAAAAAAAAAAAAAAATTAA	NA	NA	NA	NA	NA	NA_x000D_
PB.3523.4	LUXX01009493.1	-	3673	11	novel_not_in_catalog	ENSSSCG00025006714	novel	5362	11	NA	NA	14869	-1726	at_least_one_novel_splicesite	FALSE	canonical	NA	NA	NA	NA	NA	NA	NA	TRUE	NA	NA	NA	B	coding	523	1572	69	1640	2700734	2605860	FALSE	30	TATACGTGTAATCCGAATGC	NA	NA	NA	NA	ATTAAA	-17_x000D_
PB.3523.5	LUXX01009493.1	-	3496	11	novel_not_in_catalog	ENSSSCG00025006714	novel	5362	11	NA	NA	14644	-2128	at_least_one_novel_splicesite	FALSE	canonical	NA	NA	NA	NA	NA	NA	NA	TRUE	NA	NA	NA	B	coding	523	1572	294	1865	2700734	2605860	FALSE	90	AAAAAAACAAAAAAACAAAA	NA	NA	NA	NA	AGTAAA	-33_x000D_
PB.3523.7	LUXX01009493.1	-	2343	9	novel_not_in_catalog	ENSSSCG00025006714	novel	5362	11	NA	NA	14869	-9026	at_least_one_novel_splicesite	FALSE	canonical	NA	NA	NA	NA	NA	NA	NA	TRUE	NA	NA	NA	B	coding	451	1356	69	1424	2700734	2612046	FALSE	80	TAAAAAGACCAAAAAAAAAA	NA	NA	NA	NA	NA	NA_x000D_
PB.3523.8	LUXX01009493.1	-	1452	1	intergenic	novelGene_272	novel	NA	NA	NA	NA	NA	NA	mono-exon	FALSE	NA	NA	NA	NA	NA	NA	NA	NA	NA	NA	NA	NA	A	non_coding	NA	NA	NA	NA	NA	NA	NA	75	AAGATGAAAAAAAAAATAAG	NA	NA	NA	NA	CATAAA	-43_x000D_
PB.3523.9	LUXX01009493.1	-	2855	1	intergenic	novelGene_273	novel	NA	NA	NA	NA	NA	NA	mono-exon	FALSE	NA	NA	NA	NA	NA	NA	NA	NA	NA	NA	NA	NA	A	non_coding	NA	NA	NA	NA	NA	NA	NA	90	AAAAAAAAAAAAAAAATTAA	NA	NA	NA	NA	NA	NA_x000D_
PB.2397.1	LUXX01009549.1	-	4566	9	novel_in_catalog	ENSSSCG00025006782	novel	4631	10	NA	NA	7	8	combination_of_known_junctions	FALSE	canonical	NA	NA	NA	NA	NA	NA	NA	TRUE	NA	NA	NA	B	coding	447	1344	154	1497	54759	11236	FALSE	35	AAAAGTGTACAGTGATTTTT	NA	NA	NA	NA	AATAAA	-17_x000D_
PB.2397.2	LUXX01009549.1	-	4492	9	novel_not_in_catalog	ENSSSCG00025006782	novel	4631	10	NA	NA	18	8	at_least_one_novel_splicesite	TRUE	non_canonical	NA	NA	NA	NA	NA	NA	NA	TRUE	NA	NA	NA	B	coding	426	1281	143	1423	54759	11236	FALSE	35	AAAAGTGTACAGTGATTTTT	NA	NA	NA	NA	AATAAA	-17_x000D_
PB.2398.1	LUXX01009549.1	+	1682	5	full-splice_match	ENSSSCG00025007066	ENSSSCT00025009383	1852	5	1	169	1	-169	multi-exon	FALSE	canonical	NA	NA	NA	NA	NA	NA	NA	TRUE	NA	NA	NA	C	coding	253	762	313	1074	580471	616270	FALSE	50	AAAAAAAAAGCTGTGGCAGC	NA	NA	NA	NA	ACTAAA	-29_x000D_
PB.2398.2	LUXX01009549.1	+	1797	5	full-splice_match	ENSSSCG00025007066	ENSSSCT00025009383	1852	5	41	14	41	-14	multi-exon	FALSE	canonical	NA	NA	NA	NA	NA	NA	NA	TRUE	NA	NA	NA	C	coding	253	762	273	1034	580471	616270	FALSE	45	AAAGACAAACCCCACCGACT	NA	NA	NA	NA	AATAAA	-14_x000D_
PB.2398.3	LUXX01009549.1	+	1070	1	intergenic	novelGene_190	novel	NA	NA	NA	NA	NA	NA	mono-exon	FALSE	NA	NA	NA	NA	NA	NA	NA	NA	NA	NA	NA	NA	A	non_coding	NA	NA	NA	NA	NA	NA	NA	90	AAAAAGAAAAAAAAAAAAAT	NA	NA	NA	NA	NA	NA_x000D_
PB.2399.1	LUXX01009549.1	-	2784	12	full-splice_match	ENSSSCG00025007151	ENSSSCT00025009499	2784	12	3	-3	3	-2	multi-exon	FALSE	canonical	NA	NA	NA	NA	NA	NA	NA	TRUE	NA	NA	NA	A	coding	586	1761	266	2026	689997	636332	FALSE	25	AATTTACTGTCTTTTTTTAA	NA	NA	NA	NA	AATAAA	-19_x000D_
PB.2400.1	LUXX01009549.1	-	2192	5	full-splice_match	ENSSSCG00025007258	ENSSSCT00025009646	2364	5	174	-2	174	2	multi-exon	FALSE	canonical	NA	NA	NA	NA	NA	NA	NA	TRUE	NA	NA	NA	C	coding	394	1185	17	1201	785859	774811	FALSE	25	AATGGGTTTCAAGCGACTTT	NA	NA	NA	NA	AATAAA	-22_x000D_
PB.2400.2	LUXX01009549.1	-	1740	5	full-splice_match	ENSSSCG00025007258	ENSSSCT00025009646	2364	5	157	467	157	-467	multi-exon	FALSE	canonical	NA	NA	NA	NA	NA	NA	NA	TRUE	NA	NA	NA	C	coding	394	1185	34	1218	785859	774811	FALSE	40	AAATAAGTATTGGTTCTTAA	NA	NA	NA	NA	AATAAA	-16_x000D_
PB.2400.3	LUXX01009549.1	-	954	5	full-splice_match	ENSSSCG00025007258	ENSSSCT00025009646	2364	5	167	1243	167	-254	multi-exon	FALSE	canonical	NA	NA	NA	NA	NA	NA	NA	TRUE	NA	NA	NA	C	coding	310	930	24	953	785859	775066	FALSE	65	AAAATCAAAAGGAATATGAA	NA	NA	NA	NA	NA	NA_x000D_
PB.2401.1	LUXX01009549.1	+	3199	18	full-splice_match	ENSSSCG00025007542	ENSSSCT00025010284	5439	18	11	2229	11	-13	multi-exon	FALSE	canonical	NA	NA	NA	NA	NA	NA	NA	TRUE	NA	NA	NA	C	coding	486	1461	281	1741	786244	834581	FALSE	70	AAAAATTAAAACCAACAACA	NA	NA	NA	NA	AAGAAA	-18_x000D_
PB.2401.2	LUXX01009549.1	+	4409	18	novel_in_catalog	ENSSSCG00025007542	novel	5226	18	NA	NA	-17	-828	combination_of_known_junctions	FALSE	canonical	NA	NA	NA	NA	NA	NA	NA	TRUE	NA	NA	NA	C	coding	539	1620	24	1643	790060	834581	FALSE	30	TTCTGCAATAAGGACATTTT	NA	NA	NA	NA	NA	NA_x000D_
PB.2401.3	LUXX01009549.1	+	3098	18	novel_in_catalog	ENSSSCG00025007542	novel	5226	18	NA	NA	-14	-13	combination_of_known_junctions	FALSE	canonical	NA	NA	NA	NA	NA	NA	NA	TRUE	NA	NA	NA	C	coding	539	1620	21	1640	790060	834581	FALSE	70	AAAAATTAAAACCAACAACA	NA	NA	NA	NA	AAGAAA	-18_x000D_
PB.2402.1	LUXX01009549.1	-	2685	1	intergenic	novelGene_191	novel	NA	NA	NA	NA	NA	NA	mono-exon	FALSE	NA	NA	NA	NA	NA	NA	NA	NA	NA	NA	NA	NA	A	non_coding	NA	NA	NA	NA	NA	NA	NA	100	AAAAAAAAAAAAAAAAAAAA	NA	NA	NA	NA	TATAAA	-13_x000D_
PB.2403.1	LUXX01009549.1	-	1913	14	novel_in_catalog	ENSSSCG00025007890	novel	2713	15	NA	NA	36	-24	combination_of_known_junctions	FALSE	canonical	NA	NA	NA	NA	NA	NA	NA	TRUE	NA	NA	NA	A	coding	432	1299	133	1431	951007	882319	FALSE	95	AAAAAGAAAAAAAAAAAAAA	NA	NA	NA	NA	TTTAAA	-20_x000D_
PB.2404.1	LUXX01009549.1	-	1761	4	antisense	novelGene_ENSSSCG00025015402_AS	novel	NA	NA	NA	NA	NA	NA	multi-exon	FALSE	non_canonical	NA	NA	NA	NA	NA	NA	NA	FALSE	NA	NA	NA	A	non_coding	NA	NA	NA	NA	NA	NA	NA	100	AAAAAAAAAAAAAAAAAAAA	NA	NA	NA	NA	NA	NA_x000D_
PB.2405.1	LUXX01009549.1	-	4289	14	novel_in_catalog	ENSSSCG00025016145	novel	4437	14	NA	NA	23	1	combination_of_known_junctions	FALSE	canonical	NA	NA	NA	NA	NA	NA	NA	TRUE	NA	NA	NA	B	coding	455	1368	553	1920	3461000	3385544	FALSE	15	AAACTTGCTCTTTCCCCTTT	NA	NA	NA	NA	AATAAA	-21_x000D_
PB.2405.2	LUXX01009549.1	-	4236	12	incomplete-splice_match	ENSSSCG00025016145	ENSSSCT00025021684	6051	19	109	51197	43	1	3prime_fragment	FALSE	canonical	NA	NA	NA	NA	NA	NA	NA	TRUE	NA	NA	NA	B	coding	415	1248	620	1867	3461000	3385544	FALSE	15	AAACTTGCTCTTTCCCCTTT	NA	NA	NA	NA	AATAAA	-21_x000D_
PB.2405.3	LUXX01009549.1	-	4211	13	novel_in_catalog	ENSSSCG00025016145	novel	4437	14	NA	NA	77	1	combination_of_known_junctions	FALSE	canonical	NA	NA	NA	NA	NA	NA	NA	TRUE	NA	NA	NA	B	coding	447	1344	499	1842	3461000	3385544	FALSE	15	AAACTTGCTCTTTCCCCTTT	NA	NA	NA	NA	AATAAA	-21_x000D_
PB.5807.1	LUXX01009599.1	-	2526	14	novel_in_catalog	ENSSSCG00025020828	novel	3734	15	NA	NA	-12	559	combination_of_known_junctions	FALSE	canonical	NA	NA	NA	NA	NA	NA	NA	TRUE	NA	NA	NA	A	coding	500	1503	131	1633	700347	664534	FALSE	55	AACACAGTTCAAATTTAAAA	NA	NA	NA	NA	AATAAA	-22_x000D_
PB.5808.1	LUXX01009599.1	-	5512	13	novel_in_catalog	ENSSSCG00025020994	novel	5636	14	NA	NA	30	1	intron_retention	TRUE	canonical	NA	NA	NA	NA	NA	NA	NA	TRUE	NA	NA	NA	B	coding	929	2790	143	2932	770508	714447	FALSE	10	AGGTCTGCATCTGTTTGCTT	NA	NA	NA	NA	AATAAA	-18_x000D_
PB.5808.2	LUXX01009599.1	-	4835	13	novel_in_catalog	ENSSSCG00025020994	novel	5636	14	NA	NA	58	8	intron_retention	FALSE	canonical	NA	NA	NA	NA	NA	NA	NA	TRUE	NA	NA	NA	B	coding	929	2790	115	2904	770508	714447	FALSE	75	AAAAGAAAAAAAAAAAGCTT	NA	NA	NA	NA	NA	NA_x000D_
PB.5809.1	LUXX01009599.1	-	3096	7	full-splice_match	ENSSSCG00025000250	ENSSSCT00025000306	3119	7	29	-6	29	6	multi-exon	FALSE	canonical	NA	NA	NA	NA	NA	NA	NA	TRUE	NA	NA	NA	A	coding	632	1899	126	2024	880682	860032	FALSE	25	GAAAATAGCCTGTGTGGTTT	NA	NA	NA	NA	ATTAAA	-18_x000D_
PB.5810.1	LUXX01009599.1	-	7236	5	novel_in_catalog	ENSSSCG00025001028	novel	7879	7	NA	NA	25	-28	combination_of_known_junctions	FALSE	canonical	NA	NA	NA	NA	NA	NA	NA	TRUE	NA	NA	NA	B	coding	432	1299	205	1503	1188230	1182041	FALSE	90	AAAAAAAATAAAAAAATAAA	NA	NA	NA	NA	NA	NA_x000D_
PB.5810.2	LUXX01009599.1	-	905	1	incomplete-splice_match	ENSSSCG00025001028	ENSSSCT00025001232	7879	7	24949	29	17831	-29	mono-exon	FALSE	NA	NA	NA	NA	NA	NA	NA	NA	NA	NA	NA	NA	B	coding	121	366	122	487	1177092	1176727	NA	90	AAAAAAAAATAAAAAAATAA	NA	NA	NA	NA	NA	NA_x000D_
PB.5811.1	LUXX01009599.1	-	3395	6	full-splice_match	ENSSSCG00025001097	ENSSSCT00025001326	3437	6	43	-1	-2	1	multi-exon	TRUE	canonical	NA	NA	NA	NA	NA	NA	NA	TRUE	NA	NA	NA	C	coding	602	1809	250	2058	1230492	1225092	FALSE	10	AACTGGTCTTTGTCTCTTTT	NA	NA	NA	NA	ATTAAA	-17_x000D_
PB.5811.2	LUXX01009599.1	-	3353	5	novel_in_catalog	ENSSSCG00025001097	novel	3437	6	NA	NA	-24	1	combination_of_known_splicesites	FALSE	canonical	NA	NA	NA	NA	NA	NA	NA	TRUE	NA	NA	NA	C	coding	602	1809	208	2016	1230492	1225092	FALSE	10	AACTGGTCTTTGTCTCTTTT	NA	NA	NA	NA	ATTAAA	-17_x000D_
PB.5812.1	LUXX01009599.1	-	4691	1	genic	ENSSSCG00025001193	novel	NA	NA	NA	NA	10663	4	mono-exon	FALSE	NA	NA	NA	NA	NA	NA	NA	NA	NA	NA	NA	NA	B	non_coding	NA	NA	NA	NA	NA	NA	NA	10	ATGTGTGCTCTGTGTACTTC	NA	NA	NA	NA	TATAAA	-19_x000D_
PB.5812.2	LUXX01009599.1	-	3207	1	genic	ENSSSCG00025001193	novel	NA	NA	NA	NA	12145	2	mono-exon	FALSE	NA	NA	NA	NA	NA	NA	NA	NA	NA	NA	NA	NA	B	non_coding	NA	NA	NA	NA	NA	NA	NA	15	AGATGTGTGCTCTGTGTACT	NA	NA	NA	NA	TATAAA	-17_x000D_
PB.5812.3	LUXX01009599.1	-	2164	1	incomplete-splice_match	ENSSSCG00025001193	ENSSSCT00025001508	6028	5	13014	172	13014	-172	mono-exon	FALSE	NA	NA	NA	NA	NA	NA	NA	NA	NA	NA	NA	NA	B	non_coding	NA	NA	NA	NA	NA	NA	NA	80	AAAAAAATAAGAAAAAGAAC	NA	NA	NA	NA	NA	NA_x000D_
PB.5813.1	LUXX01009599.1	-	925	3	incomplete-splice_match	ENSSSCG00025001193	ENSSSCT00025001522	778	6	6654	1524	6654	-1524	internal_fragment	FALSE	canonical	NA	NA	NA	NA	NA	NA	NA	TRUE	NA	NA	NA	B	coding	138	417	9	425	1285902	1282577	FALSE	100	AAAAAAAAAAAAAAAAAAAA	NA	NA	NA	NA	NA	NA_x000D_
PB.3593.1	LUXX01009602.1	+	1129	9	novel_not_in_catalog	ENSSSCG00025002133	novel	1892	14	NA	NA	0	180	at_least_one_novel_splicesite	FALSE	canonical	NA	NA	NA	NA	NA	NA	NA	TRUE	NA	NA	NA	A	coding	247	744	206	949	1580937	1595626	FALSE	95	AAAAAAAAAAAAAAAAAAGA	NA	NA	NA	NA	NA	NA_x000D_
PB.791.1	LUXX01009708.1	+	3209	3	full-splice_match	ENSSSCG00025006648	ENSSSCT00025008790	3564	3	-72	427	-72	-427	multi-exon	FALSE	canonical	NA	NA	NA	NA	NA	NA	NA	TRUE	NA	NA	NA	A	coding	612	1839	335	2173	64802	74366	FALSE	15	GCTTTGTGTAAGAGTTCTTT	NA	NA	NA	NA	ATTAAA	-16_x000D_
PB.792.1	LUXX01009708.1	+	4017	20	novel_not_in_catalog	ENSSSCG00025006842	novel	4039	20	NA	NA	-199	17	at_least_one_novel_splicesite	FALSE	canonical	NA	NA	NA	NA	NA	NA	NA	TRUE	NA	NA	NA	B	coding	975	2928	174	3101	183938	210076	FALSE	20	TATCCTTTGAGATTTTTGTA	NA	NA	NA	NA	ATTAAA	-31_x000D_
PB.792.2	LUXX01009708.1	+	1861	13	novel_not_in_catalog	ENSSSCG00025006842	novel	4039	20	NA	NA	-86	-7877	at_least_one_novel_splicesite	FALSE	canonical	NA	NA	NA	NA	NA	NA	NA	TRUE	NA	NA	NA	B	coding	600	1800	61	1860	183938	203097	FALSE	50	AAAAAGAAAGAGATTCTGCT	NA	NA	NA	NA	ACTAAA	-9_x000D_
PB.793.1	LUXX01009708.1	+	2501	18	novel_not_in_catalog	ENSSSCG00025007391	novel	8058	24	NA	NA	-543	-19284	at_least_one_novel_splicesite	FALSE	canonical	NA	NA	NA	NA	NA	NA	NA	TRUE	NA	NA	NA	B	coding	776	2328	173	2500	2362429	2392026	FALSE	70	AAAATAAAATGAAAAACGCA	NA	NA	NA	NA	AAAAAG	-25_x000D_
PB.793.2	LUXX01009708.1	+	1093	8	incomplete-splice_match	ENSSSCG00025007391	ENSSSCT00025009859	8283	25	-46	42354	-44	-40570	3prime_fragment	FALSE	canonical	NA	NA	NA	NA	NA	NA	NA	TRUE	NA	NA	NA	B	coding	284	852	241	1092	2362429	2370740	FALSE	65	AAAAAAGAAAAGATAAGGTC	NA	NA	NA	NA	AATAAA	-30_x000D_
PB.794.1	LUXX01009708.1	+	1727	6	incomplete-splice_match	ENSSSCG00025007710	ENSSSCT00025010266	1876	7	314	1	314	-1	5prime_fragment	FALSE	canonical	NA	NA	NA	NA	NA	NA	NA	TRUE	NA	NA	NA	A	coding	247	744	114	857	3055479	3067165	FALSE	20	AATCTGATTCTCTCTATTGT	NA	NA	NA	NA	AATAAA	-14_x000D_
PB.795.1	LUXX01009708.1	+	1668	6	novel_in_catalog	ENSSSCG00025007755	novel	2991	8	NA	NA	-44	8	combination_of_known_splicesites	FALSE	canonical	NA	NA	NA	NA	NA	NA	NA	TRUE	NA	NA	NA	A	coding	248	747	108	854	3079683	3089703	FALSE	15	ATTTTAGTTGTGTTTTGTAT	NA	NA	NA	NA	AATAAA	-22_x000D_
PB.796.1	LUXX01009708.1	-	7247	50	full-splice_match	ENSSSCG00025007954	ENSSSCT00025010608	10407	50	77	3083	-1	-17	multi-exon	FALSE	canonical	NA	NA	NA	NA	NA	NA	NA	TRUE	NA	NA	NA	A	coding	2261	6786	307	7092	3207473	3097624	FALSE	75	AATGAAAAAAAAAAAAATTC	NA	NA	NA	NA	NA	NA_x000D_
PB.797.1	LUXX01009708.1	+	3398	16	incomplete-splice_match	ENSSSCG00025008450	ENSSSCT00025011260	4377	17	219	958	175	2	5prime_fragment	FALSE	canonical	NA	NA	NA	NA	NA	NA	NA	TRUE	NA	NA	NA	A	coding	657	1974	44	2017	3501015	3667203	FALSE	100	AAAAAAAAAAAAAAAAAAAA	NA	NA	NA	NA	AATACA	-11_x000D_
PB.798.1	LUXX01009708.1	+	4560	10	novel_not_in_catalog	ENSSSCG00025004889	novel	4139	6	NA	NA	-13544	-1	at_least_one_novel_splicesite	FALSE	canonical	NA	NA	NA	NA	NA	NA	NA	TRUE	NA	NA	NA	A	coding	461	1386	115	1500	3821634	3868444	FALSE	20	AGATATTTTGTGTTTATTTT	NA	NA	NA	NA	AATAAA	-18_x000D_
PB.799.1	LUXX01009708.1	-	957	1	intergenic	novelGene_48	novel	NA	NA	NA	NA	NA	NA	mono-exon	FALSE	NA	NA	NA	NA	NA	NA	NA	NA	NA	NA	NA	NA	A	non_coding	NA	NA	NA	NA	NA	NA	NA	85	AAAAAGACCAAAAAAAAAAA	NA	NA	NA	NA	AAGAAA	-5_x000D_
PB.800.1	LUXX01009708.1	+	1709	10	novel_in_catalog	ENSSSCG00025005357	novel	2188	11	NA	NA	17	-17	combination_of_known_junctions	FALSE	canonical	NA	NA	NA	NA	NA	NA	NA	TRUE	NA	NA	NA	A	coding	408	1227	41	1267	5403515	5446995	FALSE	80	GAAAAAAAAAAAAAAAATTG	NA	NA	NA	NA	NA	NA_x000D_
PB.7473.1	LUXX01009743.1	-	3385	7	incomplete-splice_match	ENSSSCG00025000569	ENSSSCT00025000787	6908	11	12714	3396	12714	-3396	internal_fragment	TRUE	canonical	NA	NA	NA	NA	NA	NA	NA	TRUE	NA	NA	NA	A	coding	246	741	402	1142	98862	92239	FALSE	20	AAGAAGCGTGGTCTGTCCTT	NA	NA	NA	NA	AATAAA	-13_x000D_
PB.1465.1	LUXX01009893.1	-	5265	29	novel_in_catalog	ENSSSCG00025000864	novel	5672	29	NA	NA	0	-1	combination_of_known_junctions	FALSE	canonical	NA	NA	NA	NA	NA	NA	NA	TRUE	NA	NA	NA	A	coding	1371	4116	184	4299	421915	381500	FALSE	20	AGTTTGAATGAGTGTCTGCT	NA	NA	NA	NA	AATAAA	-15_x000D_
PB.1466.3	LUXX01009893.1	-	2345	5	full-splice_match	ENSSSCG00025001679	ENSSSCT00025002151	2350	5	0	5	0	-5	multi-exon	TRUE	canonical	NA	NA	NA	NA	NA	NA	NA	TRUE	NA	NA	NA	C	coding	349	1050	218	1267	707903	705903	FALSE	30	ATAAAGGTCTTGGTTATTCA	NA	NA	NA	NA	AATAAA	-16_x000D_
PB.1466.6	LUXX01009893.1	-	2202	5	full-splice_match	ENSSSCG00025001679	ENSSSCT00025002151	2350	5	-2	150	-2	-150	multi-exon	FALSE	canonical	NA	NA	NA	NA	NA	NA	NA	TRUE	NA	NA	NA	C	coding	349	1050	220	1269	707903	705903	FALSE	20	TATACAGCTGATTGGTTTTT	NA	NA	NA	NA	ATTAAA	-14_x000D_
PB.1467.1	LUXX01009893.1	-	2201	10	incomplete-splice_match	ENSSSCG00025002409	ENSSSCT00025003135	4913	14	-37	5976	0	0	3prime_fragment	FALSE	canonical	NA	NA	NA	NA	NA	NA	NA	TRUE	NA	NA	NA	A	coding	261	786	163	948	1189701	1145992	FALSE	15	TCTAGATCGTTTCATTTCTT	NA	NA	NA	NA	AATAAA	-17_x000D_
PB.1468.1	LUXX01009893.1	+	504	6	full-splice_match	ENSSSCG00025002953	ENSSSCT00025003879	754	6	253	-3	253	3	multi-exon	FALSE	canonical	NA	NA	NA	NA	NA	NA	NA	TRUE	NA	NA	NA	A	coding	132	399	84	482	1461045	1463418	FALSE	10	ATTTCTTCTCATCTTTGGCT	NA	NA	NA	NA	AATAAA	-14_x000D_
PB.1469.1	LUXX01009893.1	+	3048	7	novel_in_catalog	ENSSSCG00025008790	novel	2865	7	NA	NA	-79	-2	intron_retention	FALSE	canonical	NA	NA	NA	NA	NA	NA	NA	TRUE	NA	NA	NA	A	coding	186	561	361	921	2472991	2483570	FALSE	25	AAACTATGTATTCCCCCTTT	NA	NA	NA	NA	AATAAA	-21_x000D_
PB.1470.1	LUXX01009893.1	-	2441	12	incomplete-splice_match	ENSSSCG00025009201	ENSSSCT00025012275	2770	13	1831	-15	-965	7	5prime_fragment	FALSE	canonical	NA	NA	NA	NA	NA	NA	NA	TRUE	NA	NA	NA	B	coding	442	1329	59	1387	2638874	2633299	FALSE	25	AGAAACTGTGTCATGTGTCT	NA	NA	NA	NA	AATAAA	-19_x000D_
PB.1470.2	LUXX01009893.1	-	2754	11	novel_in_catalog	ENSSSCG00025009201	novel	2316	13	NA	NA	0	5	intron_retention	TRUE	canonical	NA	NA	NA	NA	NA	NA	NA	TRUE	NA	NA	NA	B	coding	256	771	932	1702	2635552	2633299	FALSE	30	ACAGAAACTGTGTCATGTGT	NA	NA	NA	NA	AATAAA	-17_x000D_
PB.1470.3	LUXX01009893.1	-	2391	12	novel_in_catalog	ENSSSCG00025009201	novel	2316	13	NA	NA	0	0	intron_retention	FALSE	canonical	NA	NA	NA	NA	NA	NA	NA	TRUE	NA	NA	NA	B	coding	431	1296	54	1349	2637914	2633299	FALSE	55	AAAAATATTTACAGAAACTG	NA	NA	NA	NA	AATAAA	-7_x000D_
PB.1471.1	LUXX01009893.1	+	4443	1	full-splice_match	ENSSSCG00025010053	ENSSSCT00025013230	4448	1	5	0	5	0	mono-exon	FALSE	NA	NA	NA	NA	NA	NA	NA	NA	NA	NA	NA	NA	C	coding	248	747	293	1039	3251057	3251803	NA	85	AAAAAAAAAAAAAATCATAA	NA	NA	NA	NA	AATAAA	-14_x000D_
PB.1471.2	LUXX01009893.1	+	4040	1	full-splice_match	ENSSSCG00025010053	ENSSSCT00025013230	4448	1	57	351	57	-351	mono-exon	FALSE	NA	NA	NA	NA	NA	NA	NA	NA	NA	NA	NA	NA	C	coding	248	747	241	987	3251057	3251803	NA	75	AAAAAAAAAAAAAAAGTTCT	NA	NA	NA	NA	TATAAA	-23_x000D_
PB.1472.1	LUXX01009893.1	-	2852	18	novel_in_catalog	ENSSSCG00025011025	novel	3063	19	NA	NA	0	0	intron_retention	FALSE	canonical	NA	NA	NA	NA	NA	NA	NA	TRUE	NA	NA	NA	B	coding	686	2061	117	2177	3391014	3307771	FALSE	30	AACAGCAAAGTGTGTTGTGT	NA	NA	NA	NA	AATAAA	-19_x000D_
PB.1472.3	LUXX01009893.1	-	2353	18	incomplete-splice_match	ENSSSCG00025011025	ENSSSCT00025014862	2801	19	-3	503	-3	-503	3prime_fragment	FALSE	canonical	NA	NA	NA	NA	NA	NA	NA	TRUE	NA	NA	NA	B	coding	686	2061	123	2183	3391014	3307771	FALSE	45	AAAAATTTCAAGTTGCCAAC	NA	NA	NA	NA	ATTAAA	-42_x000D_
PB.1472.4	LUXX01009893.1	-	1911	13	incomplete-splice_match	ENSSSCG00025011025	ENSSSCT00025015253	2655	19	-15	11148	-7	-11148	3prime_fragment	FALSE	canonical	NA	NA	NA	NA	NA	NA	NA	TRUE	NA	NA	NA	B	coding	548	1647	127	1773	3391014	3321086	FALSE	35	GACTATGTGTATATAAATGT	NA	NA	NA	NA	ATTAAA	-18_x000D_
PB.1473.1	LUXX01009893.1	-	5558	13	novel_in_catalog	ENSSSCG00025014479	novel	5628	13	NA	NA	-5968	0	combination_of_known_junctions	FALSE	canonical	NA	NA	NA	NA	NA	NA	NA	TRUE	NA	NA	NA	B	coding	921	2766	213	2978	4480601	4460743	FALSE	20	TAATAGCTGTTGTCTGTTTA	NA	NA	NA	NA	AATAAA	-14_x000D_
PB.1473.10	LUXX01009893.1	-	2405	9	incomplete-splice_match	ENSSSCG00025014479	ENSSSCT00025019376	3030	13	39128	8823	-6002	-8823	internal_fragment	FALSE	canonical	NA	NA	NA	NA	NA	NA	NA	TRUE	NA	NA	NA	B	coding	719	2157	247	2403	4480601	4469936	FALSE	65	AAGAAAGCAAGAAAAAACTC	NA	NA	NA	NA	AGTAAA	-42_x000D_
PB.1473.11	LUXX01009893.1	-	2265	8	incomplete-splice_match	ENSSSCG00025014479	ENSSSCT00025019376	3030	13	39134	11280	-5996	-11280	internal_fragment	FALSE	canonical	NA	NA	NA	NA	NA	NA	NA	TRUE	NA	NA	NA	B	coding	675	2025	241	2265	4480601	4472391	FALSE	65	AAAGAAGAAAATCAAAAGGT	NA	NA	NA	NA	NA	NA_x000D_
PB.1473.12	LUXX01009893.1	-	1600	5	incomplete-splice_match	ENSSSCG00025014479	ENSSSCT00025019376	3030	13	39137	16088	-5993	-16088	internal_fragment	FALSE	canonical	NA	NA	NA	NA	NA	NA	NA	TRUE	NA	NA	NA	B	coding	454	1362	238	1599	4480601	4477200	FALSE	65	AAGAAAAAAATTATAAACTT	NA	NA	NA	NA	AATAGA	-20_x000D_
PB.1473.2	LUXX01009893.1	-	4202	14	novel_in_catalog	ENSSSCG00025014479	novel	5628	13	NA	NA	-5956	1441	combination_of_known_junctions	FALSE	canonical	NA	NA	NA	NA	NA	NA	NA	TRUE	NA	NA	NA	B	coding	752	2259	201	2459	4480601	4469701	TRUE	35	AAATTTGTTACAGCATTGAT	NA	NA	NA	NA	AATAAA	-14_x000D_
PB.1473.3	LUXX01009893.1	-	4085	13	novel_in_catalog	ENSSSCG00025014479	novel	5628	13	NA	NA	-6002	1441	combination_of_known_junctions	FALSE	canonical	NA	NA	NA	NA	NA	NA	NA	TRUE	NA	NA	NA	B	coding	921	2766	247	3012	4480601	4460743	FALSE	35	AAATTTGTTACAGCATTGAT	NA	NA	NA	NA	AATAAA	-14_x000D_
PB.1473.4	LUXX01009893.1	-	3892	12	novel_not_in_catalog	ENSSSCG00025014479	novel	5628	13	NA	NA	-5965	1438	at_least_one_novel_splicesite	FALSE	canonical	NA	NA	NA	NA	NA	NA	NA	TRUE	NA	NA	NA	B	coding	870	2613	210	2822	4480601	4460743	FALSE	35	AGGAAATTTGTTACAGCATT	NA	NA	NA	NA	AATAAA	-11_x000D_
PB.1473.5	LUXX01009893.1	-	3811	13	novel_in_catalog	ENSSSCG00025014479	novel	5628	13	NA	NA	-5980	1189	combination_of_known_junctions	FALSE	canonical	NA	NA	NA	NA	NA	NA	NA	TRUE	NA	NA	NA	B	coding	921	2766	225	2990	4480601	4460743	FALSE	85	AAAAAAATAAAAAAGCAAAA	NA	NA	NA	NA	AATAAA	-29_x000D_
PB.1473.6	LUXX01009893.1	-	3652	12	novel_in_catalog	ENSSSCG00025014479	novel	5628	13	NA	NA	-5968	1189	combination_of_known_splicesites	FALSE	canonical	NA	NA	NA	NA	NA	NA	NA	TRUE	NA	NA	NA	B	coding	872	2619	213	2831	4480601	4460743	FALSE	85	AAAAAAATAAAAAAGCAAAA	NA	NA	NA	NA	AATAAA	-29_x000D_
PB.1473.8	LUXX01009893.1	-	3407	13	novel_in_catalog	ENSSSCG00025014479	novel	5628	13	NA	NA	-6004	761	combination_of_known_junctions	FALSE	canonical	NA	NA	NA	NA	NA	NA	NA	TRUE	NA	NA	NA	B	coding	921	2766	249	3014	4480601	4460743	FALSE	40	AACAGCAGTTGTTTATAAAG	NA	NA	NA	NA	AGTAAA	-26_x000D_
PB.1473.9	LUXX01009893.1	-	3193	13	novel_in_catalog	ENSSSCG00025014479	novel	5628	13	NA	NA	-5969	582	combination_of_known_junctions	FALSE	canonical	NA	NA	NA	NA	NA	NA	NA	TRUE	NA	NA	NA	B	coding	921	2766	214	2979	4480601	4460743	FALSE	35	ATATTTGTAACTATCAACTT	NA	NA	NA	NA	AATAAA	-21_x000D_
PB.4750.1	LUXX01009925.1	-	1907	9	novel_not_in_catalog	ENSSSCG00025006162	novel	2742	9	NA	NA	-21	-765	at_least_one_novel_splicesite	FALSE	canonical	NA	NA	NA	NA	NA	NA	NA	TRUE	NA	NA	NA	A	coding	520	1563	91	1653	824897	764548	FALSE	15	TTATGCTGTCTTATACTTTT	NA	NA	NA	NA	AATAAA	-16_x000D_
PB.4751.1	LUXX01009925.1	-	1967	1	genic	ENSSSCG00025006487	novel	NA	NA	NA	NA	-5	-46	mono-exon	FALSE	NA	NA	NA	NA	NA	NA	NA	NA	NA	NA	NA	NA	A	coding	331	996	939	1934	1028435	1027440	NA	75	AAAAAAAAAAATAGCAGAGA	NA	NA	NA	NA	GGGGCT	-15_x000D_
PB.6539.1	LUXX01010040.1	-	1001	7	incomplete-splice_match	ENSSSCG00025007013	ENSSSCT00025009317	2090	8	245	53805	245	-53805	3prime_fragment	FALSE	canonical	NA	NA	NA	NA	NA	NA	NA	TRUE	NA	NA	NA	A	coding	210	633	62	694	311352	301102	FALSE	20	AGTTATTTAGAGCTCTGTTT	NA	NA	NA	NA	AATAAA	-18_x000D_
PB.6540.1	LUXX01010040.1	+	2004	11	novel_not_in_catalog	ENSSSCG00025007150	novel	1753	10	NA	NA	-104	5	at_least_one_novel_splicesite	FALSE	canonical	NA	NA	NA	NA	NA	NA	NA	TRUE	NA	NA	NA	A	coding	277	834	972	1805	355758	368976	FALSE	35	ATTATAAAGTATCTCTTCAT	NA	NA	NA	NA	AATAAA	-17_x000D_
PB.6541.1	LUXX01010040.1	+	1052	3	novel_in_catalog	ENSSSCG00025007262	novel	1631	9	NA	NA	31	-17061	combination_of_known_splicesites	FALSE	canonical	NA	NA	NA	NA	NA	NA	NA	TRUE	NA	NA	NA	B	coding	104	315	320	634	381778	411697	FALSE	35	AAATAACTGACTTTATTTTT	NA	NA	NA	NA	AATACA	-14_x000D_
PB.6541.2	LUXX01010040.1	+	1125	4	incomplete-splice_match	ENSSSCG00025007262	ENSSSCT00025009690	1631	9	35	17061	35	-17061	3prime_fragment	FALSE	canonical	NA	NA	NA	NA	NA	NA	NA	TRUE	NA	NA	NA	B	coding	189	570	138	707	381600	411697	FALSE	35	AAATAACTGACTTTATTTTT	NA	NA	NA	NA	AATACA	-14_x000D_
PB.6542.1	LUXX01010040.1	+	1292	7	incomplete-splice_match	ENSSSCG00025007262	ENSSSCT00025009676	2644	12	38949	0	-45	0	5prime_fragment	FALSE	canonical	NA	NA	NA	NA	NA	NA	NA	TRUE	NA	NA	NA	B	coding	289	870	46	915	420422	433448	FALSE	25	ACATTTGTATATTCATTTGT	NA	NA	NA	NA	ATTAAA	-13_x000D_
PB.6543.1	LUXX01010040.1	-	1218	8	full-splice_match	ENSSSCG00025007354	ENSSSCT00025009785	1277	8	52	7	52	-7	multi-exon	FALSE	canonical	NA	NA	NA	NA	NA	NA	NA	TRUE	NA	NA	NA	A	coding	306	921	162	1082	549685	438849	FALSE	40	AAAACACAGGTATTCTCTGA	NA	NA	NA	NA	AATAAA	-14_x000D_
PB.6544.1	LUXX01010040.1	-	4595	24	full-splice_match	ENSSSCG00025007529	ENSSSCT00025010026	4619	24	23	1	5	-1	multi-exon	FALSE	canonical	NA	NA	NA	NA	NA	NA	NA	TRUE	NA	NA	NA	C	coding	1258	3777	35	3811	661895	570079	FALSE	20	CAATATGGTTTGCTCTTTAT	NA	NA	NA	NA	ATTAAA	-14_x000D_
PB.6544.2	LUXX01010040.1	-	4485	23	full-splice_match	ENSSSCG00025007529	ENSSSCT00025010088	4638	23	155	-2	9	2	multi-exon	FALSE	canonical	NA	NA	NA	NA	NA	NA	NA	TRUE	NA	NA	NA	C	coding	1223	3672	31	3702	661895	570079	FALSE	25	ACAATATGGTTTGCTCTTTA	NA	NA	NA	NA	ATTAAA	-13_x000D_
PB.3874.1	LUXX01010084.1	-	2537	8	novel_in_catalog	ENSSSCG00025000915	novel	3320	10	NA	NA	2314	-4	combination_of_known_splicesites	FALSE	canonical	NA	NA	NA	NA	NA	NA	NA	TRUE	NA	NA	NA	B	coding	557	1674	113	1786	162672	147139	TRUE	20	TAAACATTGTTTTCTTTGCT	NA	NA	NA	NA	AATAAA	-18_x000D_
PB.3874.2	LUXX01010084.1	-	2636	9	incomplete-splice_match	ENSSSCG00025000915	ENSSSCT00025001104	3320	10	2725	5	2320	-5	5prime_fragment	FALSE	canonical	NA	NA	NA	NA	NA	NA	NA	TRUE	NA	NA	NA	B	coding	557	1674	213	1886	162672	147139	TRUE	25	ATAAACATTGTTTTCTTTGC	NA	NA	NA	NA	AATAAA	-17_x000D_
PB.3874.3	LUXX01010084.1	-	2464	7	novel_in_catalog	ENSSSCG00025000915	novel	3320	10	NA	NA	2318	-3090	combination_of_known_splicesites	FALSE	canonical	NA	NA	NA	NA	NA	NA	NA	TRUE	NA	NA	NA	B	coding	557	1674	109	1782	162672	147139	FALSE	85	AAAAAGACAAAAAGAAAAAA	NA	NA	NA	NA	NA	NA_x000D_
PB.3874.4	LUXX01010084.1	-	1755	1	novel_in_catalog	ENSSSCG00025000915	novel	3320	10	NA	NA	2308	-20264	mono-exon_by_intron_retention	FALSE	NA	NA	NA	NA	NA	NA	NA	NA	NA	NA	NA	NA	B	coding	132	399	3	401	165383	164985	NA	75	AACAAAAACAAAATCTAAAA	NA	NA	NA	NA	TATAAA	-42_x000D_
PB.3875.1	LUXX01010084.1	+	1275	10	full-splice_match	ENSSSCG00025000985	ENSSSCT00025001172	4899	10	24	3600	24	-3600	multi-exon	FALSE	canonical	NA	NA	NA	NA	NA	NA	NA	TRUE	NA	NA	NA	C	coding	358	1077	173	1249	168725	187134	FALSE	40	AAATAAGTGCATCGGCGATA	NA	NA	NA	NA	AATAAA	-16_x000D_
PB.3875.2	LUXX01010084.1	+	1637	10	full-splice_match	ENSSSCG00025000985	ENSSSCT00025001172	4899	10	28	3234	28	-3234	multi-exon	FALSE	canonical	NA	NA	NA	NA	NA	NA	NA	TRUE	NA	NA	NA	C	coding	358	1077	169	1245	168725	187134	FALSE	5	TTTCTTGACTCCTGTTTCTT	NA	NA	NA	NA	AATACA	-17_x000D_
PB.3876.1	LUXX01010084.1	+	3157	10	incomplete-splice_match	ENSSSCG00025001666	ENSSSCT00025002231	1772	12	246	-290	0	290	intron_retention	FALSE	canonical	NA	NA	NA	NA	NA	NA	NA	TRUE	NA	NA	NA	C	coding	360	1083	35	1117	360188	364344	FALSE	15	TAAGGGTGCTTTGGTCATTT	NA	NA	NA	NA	AATAAA	-15_x000D_
PB.3876.2	LUXX01010084.1	+	3018	9	incomplete-splice_match	ENSSSCG00025001666	ENSSSCT00025002324	2492	10	1	725	0	291	intron_retention	FALSE	canonical	NA	NA	NA	NA	NA	NA	NA	TRUE	NA	NA	NA	C	coding	265	798	180	977	361246	364344	FALSE	15	AAGGGTGCTTTGGTCATTTT	NA	NA	NA	NA	AATAAA	-16_x000D_
PB.3876.3	LUXX01010084.1	+	2013	12	novel_not_in_catalog	ENSSSCG00025001666	novel	2631	11	NA	NA	0	291	intron_retention	FALSE	canonical	NA	NA	NA	NA	NA	NA	NA	TRUE	NA	NA	NA	C	coding	362	1089	35	1123	360188	364779	TRUE	15	AAGGGTGCTTTGGTCATTTT	NA	NA	NA	NA	AATAAA	-16_x000D_
PB.3876.4	LUXX01010084.1	+	1906	11	full-splice_match	ENSSSCG00025001666	ENSSSCT00025002385	2631	11	0	725	0	291	multi-exon	FALSE	canonical	NA	NA	NA	NA	NA	NA	NA	TRUE	NA	NA	NA	C	coding	407	1224	35	1258	360188	365737	FALSE	15	AAGGGTGCTTTGGTCATTTT	NA	NA	NA	NA	AATAAA	-16_x000D_
PB.3876.5	LUXX01010084.1	+	1768	11	full-splice_match	ENSSSCG00025001666	ENSSSCT00025002385	2631	11	0	863	0	153	multi-exon	FALSE	canonical	NA	NA	NA	NA	NA	NA	NA	TRUE	NA	NA	NA	C	coding	407	1224	35	1258	360188	365737	FALSE	25	TGCTAAGTGTGAACTGGACC	NA	NA	NA	NA	AATAAA	-13_x000D_
PB.3877.1	LUXX01010084.1	-	1440	11	full-splice_match	ENSSSCG00025002054	ENSSSCT00025002629	1468	11	28	0	-3	0	multi-exon	FALSE	canonical	NA	NA	NA	NA	NA	NA	NA	TRUE	NA	NA	NA	A	coding	364	1095	285	1379	379990	366447	FALSE	50	AAAGTGAATATACAATTTAT	NA	NA	NA	NA	AATAAA	-19_x000D_
PB.3878.1	LUXX01010084.1	+	4024	7	novel_in_catalog	ENSSSCG00025002240	novel	4679	13	NA	NA	-9	0	combination_of_known_splicesites	FALSE	canonical	NA	NA	NA	NA	NA	NA	NA	TRUE	NA	NA	NA	A	coding	408	1227	253	1479	577096	613832	FALSE	25	AAAAGCTTGTCCCTCTTTTA	NA	NA	NA	NA	AATAAA	-11_x000D_
PB.3879.1	LUXX01010084.1	+	3406	12	novel_in_catalog	ENSSSCG00025003603	novel	2128	13	NA	NA	-6	1155	intron_retention	FALSE	canonical	NA	NA	NA	NA	NA	NA	NA	TRUE	NA	NA	NA	B	coding	615	1848	354	2201	1789688	2239143	FALSE	85	AAAAAAAAAAAAAAAAAGCC	NA	NA	NA	NA	NA	NA_x000D_
PB.3879.2	LUXX01010084.1	+	4445	11	novel_in_catalog	ENSSSCG00025003603	novel	2128	13	NA	NA	0	2264	intron_retention	FALSE	canonical	NA	NA	NA	NA	NA	NA	NA	TRUE	NA	NA	NA	B	coding	615	1848	284	2131	1789688	2239143	FALSE	85	AAAAAAAAAAAAAAAGGAAT	NA	NA	NA	NA	NA	NA_x000D_
PB.3879.3	LUXX01010084.1	+	2228	12	novel_in_catalog	ENSSSCG00025003603	novel	2128	13	NA	NA	-1	-4	intron_retention	FALSE	canonical	NA	NA	NA	NA	NA	NA	NA	TRUE	NA	NA	NA	B	coding	615	1848	335	2182	1789688	2239143	FALSE	70	AAACACAAGAAAAATATAAG	NA	NA	NA	NA	NA	NA_x000D_
PB.3879.4	LUXX01010084.1	+	4474	12	novel_in_catalog	ENSSSCG00025003603	novel	2128	13	NA	NA	21	2264	intron_retention	FALSE	canonical	NA	NA	NA	NA	NA	NA	NA	TRUE	NA	NA	NA	B	coding	615	1848	313	2160	1789688	2239143	FALSE	85	AAAAAAAAAAAAAAAGGAAT	NA	NA	NA	NA	NA	NA_x000D_
PB.3879.5	LUXX01010084.1	+	2206	12	incomplete-splice_match	ENSSSCG00025003603	ENSSSCT00025004830	5996	17	-67	26430	-67	-4	3prime_fragment	FALSE	canonical	NA	NA	NA	NA	NA	NA	NA	TRUE	NA	NA	NA	B	coding	615	1848	313	2160	1789688	2239143	FALSE	70	AAACACAAGAAAAATATAAG	NA	NA	NA	NA	NA	NA_x000D_
PB.3879.6	LUXX01010084.1	+	3351	12	novel_not_in_catalog	ENSSSCG00025003603	novel	2128	13	NA	NA	62441	1155	intron_retention	FALSE	canonical	NA	NA	NA	NA	NA	NA	NA	TRUE	NA	NA	NA	B	coding	615	1848	299	2146	1789688	2239143	FALSE	85	AAAAAAAAAAAAAAAAAGCC	NA	NA	NA	NA	NA	NA_x000D_
PB.3879.7	LUXX01010084.1	+	2192	12	novel_not_in_catalog	ENSSSCG00025003603	novel	2128	13	NA	NA	62441	-4	intron_retention	FALSE	canonical	NA	NA	NA	NA	NA	NA	NA	TRUE	NA	NA	NA	B	coding	615	1848	299	2146	1789688	2239143	FALSE	70	AAACACAAGAAAAATATAAG	NA	NA	NA	NA	NA	NA_x000D_
PB.3880.1	LUXX01010084.1	-	3108	2	antisense	novelGene_ENSSSCG00025003603_AS	novel	NA	NA	NA	NA	NA	NA	multi-exon	FALSE	non_canonical	NA	NA	NA	NA	NA	NA	NA	FALSE	NA	NA	NA	B	coding	166	501	2221	2721	1694874	1694374	TRUE	95	AAAAAAAAAAAAAAAAAAGA	NA	NA	NA	NA	NA	NA_x000D_
PB.3880.2	LUXX01010084.1	-	1813	2	antisense	novelGene_ENSSSCG00025003603_AS	novel	NA	NA	NA	NA	NA	NA	multi-exon	FALSE	non_canonical	NA	NA	NA	NA	NA	NA	NA	FALSE	NA	NA	NA	B	coding	166	501	926	1426	1694874	1694374	TRUE	95	AAAAAAAAAAAAAAAAAAGA	NA	NA	NA	NA	NA	NA_x000D_
PB.3881.1	LUXX01010084.1	-	780	1	intergenic	novelGene_304	novel	NA	NA	NA	NA	NA	NA	mono-exon	FALSE	NA	NA	NA	NA	NA	NA	NA	NA	NA	NA	NA	NA	A	non_coding	NA	NA	NA	NA	NA	NA	NA	85	AAAAAGACTAAAAAAAAAAA	NA	NA	NA	NA	NA	NA_x000D_
PB.3882.1	LUXX01010084.1	+	1684	1	intergenic	novelGene_305	novel	NA	NA	NA	NA	NA	NA	mono-exon	FALSE	NA	NA	NA	NA	NA	NA	NA	NA	NA	NA	NA	NA	A	non_coding	NA	NA	NA	NA	NA	NA	NA	80	AAAGAAAAAAAAAGGAAAGA	NA	NA	NA	NA	NA	NA_x000D_
PB.3883.1	LUXX01010084.1	+	3254	1	intergenic	novelGene_306	novel	NA	NA	NA	NA	NA	NA	mono-exon	FALSE	NA	NA	NA	NA	NA	NA	NA	NA	NA	NA	NA	NA	A	non_coding	NA	NA	NA	NA	NA	NA	NA	80	AAAAAAGAAAAGGAAAAAAG	NA	NA	NA	NA	AAGAAA	-40_x000D_
PB.3883.2	LUXX01010084.1	+	1243	1	intergenic	novelGene_307	novel	NA	NA	NA	NA	NA	NA	mono-exon	FALSE	NA	NA	NA	NA	NA	NA	NA	NA	NA	NA	NA	NA	A	non_coding	NA	NA	NA	NA	NA	NA	NA	80	AAAAAAGAAAAGGAAAAAAG	NA	NA	NA	NA	AAGAAA	-40_x000D_
PB.3884.1	LUXX01010084.1	+	3426	1	novel_in_catalog	ENSSSCG00025003603	novel	5996	17	NA	NA	692536	-10715	mono-exon	FALSE	NA	NA	NA	NA	NA	NA	NA	NA	NA	NA	NA	NA	B	non_coding	NA	NA	NA	NA	NA	NA	NA	15	TATGTGTGGAATTCTTTTTT	NA	NA	NA	NA	AATAAA	-20_x000D_
PB.3884.2	LUXX01010084.1	+	2371	1	intergenic	novelGene_308	novel	NA	NA	NA	NA	NA	NA	mono-exon	FALSE	NA	NA	NA	NA	NA	NA	NA	NA	NA	NA	NA	NA	A	non_coding	NA	NA	NA	NA	NA	NA	NA	20	ACTTGCCTATGTGTGGAATT	NA	NA	NA	NA	AATAAA	-13_x000D_
PB.4469.1	LUXX01010096.1	+	5839	68	novel_not_in_catalog	ENSSSCG00025018266	novel	6440	68	NA	NA	-31	-293	at_least_one_novel_splicesite	TRUE	canonical	NA	NA	NA	NA	NA	NA	NA	TRUE	NA	NA	NA	B	coding	1806	5421	139	5559	370605	573613	FALSE	75	AAAAAAAGAGAAAAATATAT	NA	NA	NA	NA	NA	NA_x000D_
PB.4469.2	LUXX01010096.1	+	5959	67	incomplete-splice_match	ENSSSCG00025018266	ENSSSCT00025025001	8194	81	97312	293	148	-293	5prime_fragment	FALSE	canonical	NA	NA	NA	NA	NA	NA	NA	TRUE	NA	NA	NA	B	coding	1806	5421	259	5679	370605	573613	FALSE	75	AAAAAAAGAGAAAAATATAT	NA	NA	NA	NA	NA	NA_x000D_
PB.4470.1	LUXX01010096.1	+	3703	6	incomplete-splice_match	ENSSSCG00025018834	ENSSSCT00025025540	3825	7	220	-17	220	-3	5prime_fragment	FALSE	canonical	NA	NA	NA	NA	NA	NA	NA	TRUE	NA	NA	NA	A	coding	458	1377	131	1507	1162635	1357601	FALSE	50	AAATGAATAACTTACTCTAA	NA	NA	NA	NA	AATAAA	-19_x000D_
PB.4471.1	LUXX01010096.1	-	2261	2	full-splice_match	ENSSSCG00025019072	ENSSSCT00025025860	4025	2	1072	692	997	-29	multi-exon	FALSE	canonical	NA	NA	NA	NA	NA	NA	NA	TRUE	NA	NA	NA	C	coding	382	1149	392	1540	1800096	1798948	FALSE	90	GAAAAAAAAAAAAGAAAAAA	NA	NA	NA	NA	NA	NA_x000D_
PB.4471.2	LUXX01010096.1	-	1693	2	full-splice_match	ENSSSCG00025019072	ENSSSCT00025025860	4025	2	983	1349	908	-23	multi-exon	FALSE	canonical	NA	NA	NA	NA	NA	NA	NA	TRUE	NA	NA	NA	C	coding	382	1149	481	1629	1800096	1798948	FALSE	95	AAAAGAAAAAAAAAAAAAAA	NA	NA	NA	NA	NA	NA_x000D_
PB.4472.1	LUXX01010096.1	+	1622	8	incomplete-splice_match	ENSSSCG00025019211	ENSSSCT00025026045	2223	9	20	647	20	-647	intron_retention	FALSE	canonical	NA	NA	NA	NA	NA	NA	NA	TRUE	NA	NA	NA	A	coding	285	858	112	969	2002409	2035989	FALSE	40	AACAATGGATTAGTTAGATT	NA	NA	NA	NA	AATAAA	-17_x000D_
PB.4473.1	LUXX01010096.1	-	2255	1	intergenic	novelGene_352	novel	NA	NA	NA	NA	NA	NA	mono-exon	FALSE	NA	NA	NA	NA	NA	NA	NA	NA	NA	NA	NA	NA	A	non_coding	NA	NA	NA	NA	NA	NA	NA	25	TACCTGAATTGTGTCCATTA	NA	NA	NA	NA	AATAAA	-45_x000D_
PB.6146.1	LUXX01010196.1	-	2315	12	novel_in_catalog	ENSSSCG00025019916	novel	2648	12	NA	NA	26	0	intron_retention	FALSE	canonical	NA	NA	NA	NA	NA	NA	NA	TRUE	NA	NA	NA	B	coding	439	1320	338	1657	871982	857593	FALSE	30	TACATTGGAACCAGTGTGAT	NA	NA	NA	NA	AATAAA	-19_x000D_
PB.6146.2	LUXX01010196.1	-	2149	11	novel_in_catalog	ENSSSCG00025019916	novel	2648	12	NA	NA	68	0	combination_of_known_splicesites	FALSE	canonical	NA	NA	NA	NA	NA	NA	NA	TRUE	NA	NA	NA	B	coding	439	1320	172	1491	871982	857593	FALSE	30	TACATTGGAACCAGTGTGAT	NA	NA	NA	NA	AATAAA	-19_x000D_
PB.6146.3	LUXX01010196.1	-	2062	10	incomplete-splice_match	ENSSSCG00025019916	ENSSSCT00025027092	2064	11	68	2	68	0	5prime_fragment	FALSE	canonical	NA	NA	NA	NA	NA	NA	NA	TRUE	NA	NA	NA	B	coding	439	1320	85	1404	871982	857593	FALSE	30	TACATTGGAACCAGTGTGAT	NA	NA	NA	NA	AATAAA	-19_x000D_
PB.6147.1	LUXX01010196.1	+	1527	7	incomplete-splice_match	ENSSSCG00025020227	ENSSSCT00025027488	1462	8	-6	11	-6	2	intron_retention	FALSE	canonical	NA	NA	NA	NA	NA	NA	NA	TRUE	NA	NA	NA	A	coding	270	813	33	845	912206	1046244	FALSE	10	ACTGGCGGCGACTTGGGCTC	NA	NA	NA	NA	AATAAA	-13_x000D_
PB.6615.1	LUXX01010201.1	-	1558	5	novel_in_catalog	ENSSSCG00025000479	novel	2034	6	NA	NA	337	-1	intron_retention	FALSE	canonical	NA	NA	NA	NA	NA	NA	NA	TRUE	NA	NA	NA	A	coding	318	957	104	1060	811313	761921	FALSE	15	ACTTCGGCATCATGTTTGCG	NA	NA	NA	NA	AATAAA	-15_x000D_
PB.5605.1	LUXX01010294.1	+	2612	7	incomplete-splice_match	ENSSSCG00025000925	ENSSSCT00025001142	4669	8	-63	2157	-37	-28	3prime_fragment	FALSE	canonical	NA	NA	NA	NA	NA	NA	NA	TRUE	NA	NA	NA	B	coding	259	780	87	866	56848	90645	FALSE	85	AAAAAAAAGAAAAGTAAAAA	NA	NA	NA	NA	AAGAAA	-42_x000D_
PB.5605.2	LUXX01010294.1	+	2844	7	incomplete-splice_match	ENSSSCG00025000925	ENSSSCT00025001142	4669	8	-26	1888	0	-235	3prime_fragment	FALSE	canonical	NA	NA	NA	NA	NA	NA	NA	TRUE	NA	NA	NA	B	coding	259	780	50	829	56848	90645	FALSE	15	ATACTGGTTCGTGGCCTAGT	NA	NA	NA	NA	TATAAA	-21_x000D_
PB.5605.4	LUXX01010294.1	+	3060	7	incomplete-splice_match	ENSSSCG00025000925	ENSSSCT00025001142	4669	8	-14	1660	12	-7	3prime_fragment	FALSE	canonical	NA	NA	NA	NA	NA	NA	NA	TRUE	NA	NA	NA	B	coding	259	780	38	817	56848	90645	FALSE	55	AAAAGAGAAGACTGATTTAA	NA	NA	NA	NA	ATTAAA	-21_x000D_
PB.5606.1	LUXX01010294.1	-	3431	19	incomplete-splice_match	ENSSSCG00025001445	ENSSSCT00025002093	4968	31	79949	-1	50871	0	5prime_fragment	TRUE	canonical	NA	NA	NA	NA	NA	NA	NA	TRUE	NA	NA	NA	A	coding	809	2430	47	2476	199537	137275	FALSE	45	TATTTAAATATCACAGATAC	NA	NA	NA	NA	AATAAA	-17_x000D_
PB.6606.1	LUXX01010530.1	-	4122	14	novel_not_in_catalog	ENSSSCG00025004204	novel	4239	15	NA	NA	5743	-10	at_least_one_novel_splicesite	TRUE	canonical	NA	NA	NA	NA	NA	NA	NA	TRUE	NA	NA	NA	B	coding	637	1914	396	2309	231646	201824	FALSE	80	AAAAGCAAAATAAAATAAAA	NA	NA	NA	NA	NA	NA_x000D_
PB.6606.2	LUXX01010530.1	-	3129	13	novel_not_in_catalog	ENSSSCG00025004204	novel	3128	13	NA	NA	5781	-2	intron_retention	FALSE	canonical	NA	NA	NA	NA	NA	NA	NA	TRUE	NA	NA	NA	B	coding	526	1581	358	1938	231646	207504	FALSE	5	TACTTTTTGCCTTTCTTTTC	NA	NA	NA	NA	AATAAA	-21_x000D_
PB.3954.1	LUXX01010790.1	-	2124	2	antisense	novelGene_ENSSSCG00025006206_AS	novel	NA	NA	NA	NA	NA	NA	multi-exon	FALSE	canonical	NA	NA	NA	NA	NA	NA	NA	FALSE	NA	NA	NA	A	non_coding	NA	NA	NA	NA	NA	NA	NA	85	AAAAAAAAAAAAAAAAAGGT	NA	NA	NA	NA	TTTAAA	-16_x000D_
PB.3955.1	LUXX01010790.1	-	3011	14	incomplete-splice_match	ENSSSCG00025006269	ENSSSCT00025008317	3023	15	-4	25924	0	16	3prime_fragment	FALSE	canonical	NA	NA	NA	NA	NA	NA	NA	TRUE	NA	NA	NA	A	coding	795	2388	161	2548	1063734	1007557	FALSE	20	ACTTTGATATTTTTGTTCTA	NA	NA	NA	NA	AATAAA	-29_x000D_
PB.3956.1	LUXX01010790.1	+	1555	2	incomplete-splice_match	ENSSSCG00025006411	ENSSSCT00025008483	1416	3	136	0	-3	0	intron_retention	FALSE	canonical	NA	NA	NA	NA	NA	NA	NA	TRUE	NA	NA	NA	A	coding	244	735	96	830	1244941	1245675	FALSE	10	CATGGGGGGGTCTTGCTTAC	NA	NA	NA	NA	ATTAAA	-21_x000D_
PB.3957.1	LUXX01010790.1	-	3041	12	full-splice_match	ENSSSCG00025006468	ENSSSCT00025008574	4240	12	55	1144	45	-13	multi-exon	FALSE	canonical	NA	NA	NA	NA	NA	NA	NA	TRUE	NA	NA	NA	A	coding	525	1578	77	1654	1358114	1254571	FALSE	65	GAAAAAAAAAAAATTAGCGT	NA	NA	NA	NA	NA	NA_x000D_
PB.3958.1	LUXX01010790.1	-	2491	3	novel_in_catalog	ENSSSCG00025006639	novel	1607	12	NA	NA	-31	-30419	intron_retention	FALSE	canonical	NA	NA	NA	NA	NA	NA	NA	TRUE	NA	NA	NA	A	coding	93	282	62	343	1580562	1579470	TRUE	65	TAAATGAAAAGAAATTAAAC	NA	NA	NA	NA	NA	NA_x000D_
PB.3959.1	LUXX01010790.1	+	2706	28	full-splice_match	ENSSSCG00025006753	ENSSSCT00025008949	4098	28	28	1364	28	-1364	multi-exon	FALSE	canonical	NA	NA	NA	NA	NA	NA	NA	TRUE	NA	NA	NA	A	coding	808	2427	197	2623	1746086	1784593	FALSE	15	TACTTTTATTCTGCTTCATC	NA	NA	NA	NA	AATAAA	-19_x000D_
PB.3960.1	LUXX01010790.1	+	931	3	full-splice_match	ENSSSCG00025007227	ENSSSCT00025009593	2497	3	0	1566	0	5	multi-exon	FALSE	canonical	NA	NA	NA	NA	NA	NA	NA	TRUE	NA	NA	NA	A	coding	151	456	1	456	2146252	2159271	FALSE	25	ATGGTATGGTTTTTAAAGTC	NA	NA	NA	NA	ATTAAA	-22_x000D_
PB.3869.1	LUXX01010885.1	-	3814	6	incomplete-splice_match	ENSSSCG00025000458	ENSSSCT00025000581	4935	11	-33	20031	-33	-20031	3prime_fragment	FALSE	canonical	NA	NA	NA	NA	NA	NA	NA	TRUE	NA	NA	NA	A	coding	319	960	25	984	221348	201926	FALSE	85	AAAAAAAAAAAAAAAGCGAA	NA	NA	NA	NA	AATGAA	-38_x000D_
PB.3870.1	LUXX01010885.1	+	2766	3	incomplete-splice_match	ENSSSCG00025001662	ENSSSCT00025002083	1858	5	810	-6	810	6	intron_retention	FALSE	canonical	NA	NA	NA	NA	NA	NA	NA	TRUE	NA	NA	NA	B	coding	157	474	169	642	778199	780655	FALSE	15	ACGTCTGACTTGTTCATTTG	NA	NA	NA	NA	AATAAA	-20_x000D_
PB.3870.2	LUXX01010885.1	+	1953	4	incomplete-splice_match	ENSSSCG00025001662	ENSSSCT00025002083	1858	5	810	5	810	-5	5prime_fragment	FALSE	canonical	NA	NA	NA	NA	NA	NA	NA	TRUE	NA	NA	NA	B	coding	248	747	169	915	778199	781730	FALSE	40	AAAGAGAGCAGACGTCTGAC	NA	NA	NA	NA	AATAAA	-9_x000D_
PB.3871.1	LUXX01010885.1	+	1767	16	novel_in_catalog	ENSSSCG00025002472	novel	5253	18	NA	NA	0	-249	combination_of_known_junctions	TRUE	canonical	NA	NA	NA	NA	NA	NA	NA	TRUE	NA	NA	NA	B	coding	515	1545	223	1767	1232934	1307282	FALSE	70	AAAAAATCTAAAAGAAGCAA	NA	NA	NA	NA	NA	NA_x000D_
PB.3871.2	LUXX01010885.1	+	2113	17	novel_not_in_catalog	ENSSSCG00025002472	novel	5225	18	NA	NA	10	5	at_least_one_novel_splicesite	FALSE	canonical	NA	NA	NA	NA	NA	NA	NA	TRUE	NA	NA	NA	B	coding	578	1737	213	1949	1232934	1307372	FALSE	35	TAAAAATCTTTGTCTTGTAA	NA	NA	NA	NA	AATAAA	-24_x000D_
PB.3871.3	LUXX01010885.1	+	1684	15	novel_in_catalog	ENSSSCG00025002472	novel	5194	17	NA	NA	-13	-249	combination_of_known_junctions	FALSE	canonical	NA	NA	NA	NA	NA	NA	NA	TRUE	NA	NA	NA	B	coding	492	1476	209	1684	1232934	1307282	FALSE	70	AAAAAATCTAAAAGAAGCAA	NA	NA	NA	NA	NA	NA_x000D_
PB.3871.4	LUXX01010885.1	+	1721	17	novel_not_in_catalog	ENSSSCG00025002472	novel	5225	18	NA	NA	24	-249	at_least_one_novel_splicesite	FALSE	canonical	NA	NA	NA	NA	NA	NA	NA	TRUE	NA	NA	NA	B	coding	522	1566	156	1721	1232934	1307282	FALSE	70	AAAAAATCTAAAAGAAGCAA	NA	NA	NA	NA	NA	NA_x000D_
PB.3872.1	LUXX01010885.1	-	3200	6	incomplete-splice_match	ENSSSCG00025003286	ENSSSCT00025004320	6367	7	-15	10130	-15	-10130	3prime_fragment	FALSE	canonical	NA	NA	NA	NA	NA	NA	NA	TRUE	NA	NA	NA	B	coding	165	498	306	803	1922418	1869312	FALSE	20	AGTTTCTGTTTGTGAGATAT	NA	NA	NA	NA	AATAAA	-16_x000D_
PB.3872.2	LUXX01010885.1	-	2337	6	incomplete-splice_match	ENSSSCG00025003286	ENSSSCT00025004320	6367	7	-73	11051	-73	-11051	3prime_fragment	FALSE	canonical	NA	NA	NA	NA	NA	NA	NA	TRUE	NA	NA	NA	B	coding	165	498	364	861	1922418	1869312	FALSE	25	AATGCCGGTATCTTATATCC	NA	NA	NA	NA	TATAAA	-15_x000D_
PB.3872.3	LUXX01010885.1	-	1210	6	incomplete-splice_match	ENSSSCG00025003286	ENSSSCT00025004320	6367	7	-118	12223	-118	-12223	3prime_fragment	FALSE	canonical	NA	NA	NA	NA	NA	NA	NA	TRUE	NA	NA	NA	B	coding	165	498	409	906	1922418	1869312	FALSE	25	AAAGAGTGGCCAGCCTTTTT	NA	NA	NA	NA	AATACA	-15_x000D_
PB.3872.4	LUXX01010885.1	-	941	5	novel_in_catalog	ENSSSCG00025003286	novel	6367	7	NA	NA	-5	-12223	combination_of_known_splicesites	FALSE	canonical	NA	NA	NA	NA	NA	NA	NA	TRUE	NA	NA	NA	B	coding	113	342	296	637	1922418	1869312	FALSE	25	AAAGAGTGGCCAGCCTTTTT	NA	NA	NA	NA	AATACA	-15_x000D_
PB.3873.1	LUXX01010885.1	+	4230	24	novel_not_in_catalog	ENSSSCG00025003513	novel	6522	25	NA	NA	-992	-2168	at_least_one_novel_splicesite	TRUE	canonical	NA	NA	NA	NA	NA	NA	NA	TRUE	NA	NA	NA	B	coding	1089	3270	194	3463	2053636	2094287	TRUE	35	TAAGTAGGTGACAAGTTTGA	NA	NA	NA	NA	ATTAAA	-15_x000D_
PB.3873.2	LUXX01010885.1	+	6389	24	novel_not_in_catalog	ENSSSCG00025003513	novel	6522	25	NA	NA	-983	0	intron_retention	TRUE	non_canonical	NA	NA	NA	NA	NA	NA	NA	TRUE	NA	NA	NA	B	coding	1089	3270	185	3454	2053636	2094287	TRUE	25	ATGCTAAGGTTCCAGCATGT	NA	NA	NA	NA	AATAAA	-22_x000D_
PB.3873.3	LUXX01010885.1	+	6181	24	novel_not_in_catalog	ENSSSCG00025003513	novel	6522	25	NA	NA	-934	-159	intron_retention	FALSE	non_canonical	NA	NA	NA	NA	NA	NA	NA	TRUE	NA	NA	NA	B	coding	1089	3270	136	3405	2053636	2094287	TRUE	10	TTCCCCAGACGGTGGTGTGG	NA	NA	NA	NA	AATAAA	-19_x000D_
PB.3873.4	LUXX01010885.1	+	6302	24	novel_not_in_catalog	ENSSSCG00025003513	novel	6522	25	NA	NA	1867	-1	intron_retention	FALSE	canonical	NA	NA	NA	NA	NA	NA	NA	TRUE	NA	NA	NA	B	coding	1089	3270	99	3368	2053636	2094287	TRUE	25	TATGCTAAGGTTCCAGCATG	NA	NA	NA	NA	AATAAA	-21_x000D_
PB.4941.1	LUXX01011190.1	-	1229	2	antisense	novelGene_ENSSSCG00025005070_AS	novel	NA	NA	NA	NA	NA	NA	multi-exon	FALSE	canonical	NA	NA	NA	NA	NA	NA	NA	FALSE	NA	NA	NA	A	coding	120	363	501	863	90463	90101	FALSE	5	TCCCGTTGTGGCTCAGTGGT	NA	NA	NA	NA	AATAAA	-16_x000D_
PB.4942.1	LUXX01011190.1	+	3061	2	novel_not_in_catalog	ENSSSCG00025005070	novel	6667	16	NA	NA	55148	-3	intron_retention	FALSE	non_canonical	NA	NA	NA	NA	NA	NA	NA	FALSE	NA	NA	NA	B	coding	100	303	119	421	134728	135030	FALSE	20	AAATGATTCCTTTTCTGTTT	NA	NA	NA	NA	AATAAA	-12_x000D_
PB.4942.2	LUXX01011190.1	+	3629	7	incomplete-splice_match	ENSSSCG00025005070	ENSSSCT00025006851	6667	16	55746	3	55746	-3	5prime_fragment	FALSE	canonical	NA	NA	NA	NA	NA	NA	NA	TRUE	NA	NA	NA	B	coding	315	948	42	989	126901	135030	FALSE	20	AAATGATTCCTTTTCTGTTT	NA	NA	NA	NA	AATAAA	-12_x000D_
PB.4943.1	LUXX01011190.1	-	1339	6	novel_not_in_catalog	ENSSSCG00025005401	novel	1480	6	NA	NA	-42	0	intron_retention	FALSE	canonical	NA	NA	NA	NA	NA	NA	NA	TRUE	NA	NA	NA	A	coding	181	546	73	618	377906	365596	FALSE	30	ACTTTGTGGATTTCAAGAGA	NA	NA	NA	NA	ATTAAA	-18_x000D_
PB.4944.1	LUXX01011190.1	-	946	2	full-splice_match	ENSSSCG00025005918	ENSSSCT00025007894	1944	2	331	667	331	-667	multi-exon	FALSE	canonical	NA	NA	NA	NA	NA	NA	NA	TRUE	NA	NA	NA	A	coding	147	441	504	944	603904	603464	FALSE	30	AAGACCTGGTGTTTGGAACA	NA	NA	NA	NA	AATGAA	-15_x000D_
PB.4945.1	LUXX01011190.1	-	1465	6	novel_in_catalog	ENSSSCG00025005946	novel	1551	7	NA	NA	6	1	combination_of_known_junctions	TRUE	canonical	NA	NA	NA	NA	NA	NA	NA	TRUE	NA	NA	NA	A	coding	193	582	70	651	632653	622568	FALSE	15	AAGCCCATGCTGTCCTGTTC	NA	NA	NA	NA	AATAAA	-14_x000D_
PB.4946.1	LUXX01011190.1	+	2985	20	incomplete-splice_match	ENSSSCG00025006180	ENSSSCT00025008344	7284	32	195208	38	44655	0	5prime_fragment	TRUE	canonical	NA	NA	NA	NA	NA	NA	NA	TRUE	NA	NA	NA	A	coding	797	2394	84	2477	861481	880872	FALSE	80	AAAAGACAAAAAGACAAAAA	NA	NA	NA	NA	TTTAAA	-19_x000D_
PB.4947.1	LUXX01011190.1	+	3770	24	novel_in_catalog	ENSSSCG00025006502	novel	4644	23	NA	NA	-5	-201	intron_retention	TRUE	canonical	NA	NA	NA	NA	NA	NA	NA	TRUE	NA	NA	NA	B	coding	1037	3114	15	3128	889513	929180	FALSE	75	AAAAAAAAAAATGGAGGAAA	NA	NA	NA	NA	NA	NA_x000D_
PB.4947.2	LUXX01011190.1	+	3967	24	novel_in_catalog	ENSSSCG00025006502	novel	4644	23	NA	NA	1	0	intron_retention	FALSE	canonical	NA	NA	NA	NA	NA	NA	NA	TRUE	NA	NA	NA	B	coding	1037	3114	9	3122	889513	929180	FALSE	25	AACTTAGTCTGCATGGTATG	NA	NA	NA	NA	AGTAAA	-17_x000D_
PB.4947.3	LUXX01011190.1	+	2158	13	incomplete-splice_match	ENSSSCG00025006502	ENSSSCT00025008706	4644	23	5	19218	5	-19218	3prime_fragment	FALSE	canonical	NA	NA	NA	NA	NA	NA	NA	TRUE	NA	NA	NA	B	coding	492	1479	5	1483	889513	910130	FALSE	75	AAAAATAAATTAAAAAATTA	NA	NA	NA	NA	NA	NA_x000D_
PB.4948.1	LUXX01011190.1	+	1582	8	incomplete-splice_match	ENSSSCG00025006733	ENSSSCT00025008917	2516	11	9643	-10	9643	10	5prime_fragment	TRUE	canonical	NA	NA	NA	NA	NA	NA	NA	TRUE	NA	NA	NA	A	coding	360	1083	129	1211	1008762	1015480	FALSE	10	TATTTGACTGTGCCGTTCCT	NA	NA	NA	NA	AATAAA	-22_x000D_
PB.4949.1	LUXX01011190.1	-	1070	7	novel_not_in_catalog	ENSSSCG00025007110	novel	1975	6	NA	NA	-7	2	at_least_one_novel_splicesite	FALSE	canonical	NA	NA	NA	NA	NA	NA	NA	TRUE	NA	NA	NA	A	coding	231	696	142	837	1238333	1235515	FALSE	10	AGTGTGTTCCTCCTGAGTGT	NA	NA	NA	NA	AATAAA	-17_x000D_
PB.4950.1	LUXX01011190.1	-	2538	9	novel_in_catalog	ENSSSCG00025007324	novel	3106	9	NA	NA	-82	0	combination_of_known_junctions	FALSE	canonical	NA	NA	NA	NA	NA	NA	NA	TRUE	NA	NA	NA	A	coding	417	1254	207	1460	1429756	1423324	FALSE	15	TAGCCGTTTGCACTGAGTCT	NA	NA	NA	NA	GATAAA	-17_x000D_
PB.4951.1	LUXX01011190.1	-	6320	27	full-splice_match	ENSSSCG00025007850	ENSSSCT00025010873	8563	27	-40	2283	3	0	multi-exon	FALSE	canonical	NA	NA	NA	NA	NA	NA	NA	TRUE	NA	NA	NA	C	coding	1547	4644	116	4759	1612022	1521328	FALSE	20	AATTGTTTGCAGTTTTCCCA	NA	NA	NA	NA	ATTAAA	-15_x000D_
PB.4951.3	LUXX01011190.1	-	5493	27	full-splice_match	ENSSSCG00025007850	ENSSSCT00025010873	8563	27	0	3070	0	189	multi-exon	FALSE	canonical	NA	NA	NA	NA	NA	NA	NA	TRUE	NA	NA	NA	C	coding	1547	4644	76	4719	1612022	1521328	FALSE	35	TAATACTAAATGCTGGTTAT	NA	NA	NA	NA	AATAAA	-16_x000D_
PB.4951.4	LUXX01011190.1	-	5258	27	full-splice_match	ENSSSCG00025007850	ENSSSCT00025010873	8563	27	0	3305	0	-10	multi-exon	FALSE	canonical	NA	NA	NA	NA	NA	NA	NA	TRUE	NA	NA	NA	C	coding	1547	4644	76	4719	1612022	1521328	FALSE	80	AAAACAAAACAAAACAAACA	NA	NA	NA	NA	NA	NA_x000D_
PB.4951.5	LUXX01011190.1	-	4903	27	full-splice_match	ENSSSCG00025007850	ENSSSCT00025010873	8563	27	-26	3686	4	-391	multi-exon	FALSE	canonical	NA	NA	NA	NA	NA	NA	NA	TRUE	NA	NA	NA	C	coding	1547	4644	102	4745	1612022	1521328	FALSE	15	TTTTGTATTTTTTTCCTTAA	NA	NA	NA	NA	AAAAAG	-30_x000D_
PB.4952.1	LUXX01011190.1	-	2561	2	incomplete-splice_match	ENSSSCG00025000305	ENSSSCT00025000366	5519	14	35283	-970	35283	970	5prime_fragment	FALSE	canonical	NA	NA	NA	NA	NA	NA	NA	TRUE	NA	NA	NA	B	coding	123	372	33	404	1648272	1642216	FALSE	50	AAAAACAAGTATGAGGTCAC	NA	NA	NA	NA	AATAAA	-15_x000D_
PB.4953.1	LUXX01011190.1	-	3474	12	novel_not_in_catalog	ENSSSCG00025000305	novel	5519	14	NA	NA	0	-9969	at_least_one_novel_splicesite	FALSE	canonical	NA	NA	NA	NA	NA	NA	NA	TRUE	NA	NA	NA	B	coding	564	1695	450	2144	1681636	1652328	FALSE	30	AAGTGCCTGTAAGAGAGTTT	NA	NA	NA	NA	ATTAAA	-14_x000D_
PB.4953.2	LUXX01011190.1	-	3188	12	incomplete-splice_match	ENSSSCG00025000305	ENSSSCT00025000366	5519	14	-18	9969	-18	-9969	3prime_fragment	FALSE	canonical	NA	NA	NA	NA	NA	NA	NA	TRUE	NA	NA	NA	B	coding	564	1695	164	1858	1681636	1652328	FALSE	30	AAGTGCCTGTAAGAGAGTTT	NA	NA	NA	NA	ATTAAA	-14_x000D_
PB.4954.1	LUXX01011190.1	-	1879	7	novel_in_catalog	ENSSSCG00025000906	novel	3325	19	NA	NA	10	2	intron_retention	FALSE	canonical	NA	NA	NA	NA	NA	NA	NA	TRUE	NA	NA	NA	B	coding	333	1002	206	1207	1697064	1689655	FALSE	15	AACCCGTGTGGTCTCAGCTC	NA	NA	NA	NA	AATAAA	-34_x000D_
PB.4954.2	LUXX01011190.1	-	2059	8	incomplete-splice_match	ENSSSCG00025000906	ENSSSCT00025001282	3325	19	8231	-1	16	0	5prime_fragment	FALSE	canonical	NA	NA	NA	NA	NA	NA	NA	TRUE	NA	NA	NA	B	coding	375	1128	200	1327	1697064	1689723	FALSE	35	AAAGAATTAACCCGTGTGGT	NA	NA	NA	NA	AATAAA	-26_x000D_
PB.4955.1	LUXX01011190.1	-	1593	9	novel_in_catalog	ENSSSCG00025001118	novel	2915	8	NA	NA	238	-767	intron_retention	FALSE	canonical	NA	NA	NA	NA	NA	NA	NA	TRUE	NA	NA	NA	A	coding	305	918	51	968	1713156	1708254	FALSE	20	AAGAGCTGCTTGTGTCTGAG	NA	NA	NA	NA	AATAAA	-29_x000D_
PB.5832.1	LUXX01011191.1	-	1631	1	intergenic	novelGene_452	novel	NA	NA	NA	NA	NA	NA	mono-exon	FALSE	NA	NA	NA	NA	NA	NA	NA	NA	NA	NA	NA	NA	A	non_coding	NA	NA	NA	NA	NA	NA	NA	90	AAAAAAAAAAAAAAAGAAGA	NA	NA	NA	NA	NA	NA_x000D_
PB.5833.1	LUXX01011191.1	-	6377	48	incomplete-splice_match	ENSSSCG00025002286	ENSSSCT00025003333	8575	50	-13	5686	0	-1	3prime_fragment	TRUE	canonical	NA	NA	NA	NA	NA	NA	NA	TRUE	NA	NA	NA	A	coding	1934	5805	322	6126	392680	305995	FALSE	25	AGAACTCTTTCTGATTAGTT	NA	NA	NA	NA	AATAAA	-19_x000D_
PB.5834.1	LUXX01011191.1	+	3186	19	novel_in_catalog	ENSSSCG00025003414	novel	2903	21	NA	NA	-3	-4	intron_retention	FALSE	non_canonical	NA	NA	NA	NA	NA	NA	NA	TRUE	NA	NA	NA	B	coding	549	1650	72	1721	576549	621335	FALSE	85	AAAAAGACCAAAAAAAAAAA	NA	NA	NA	NA	AAGAAA	-5_x000D_
PB.5834.2	LUXX01011191.1	+	2792	19	novel_in_catalog	ENSSSCG00025003414	novel	2903	21	NA	NA	-3	2	intron_retention	FALSE	non_canonical	NA	NA	NA	NA	NA	NA	NA	TRUE	NA	NA	NA	B	coding	549	1650	72	1721	576549	621335	FALSE	10	ACTGTTTTGCTGCTTTCTGA	NA	NA	NA	NA	AATATA	-18_x000D_
PB.5835.1	LUXX01011191.1	+	2213	8	full-splice_match	ENSSSCG00025003644	ENSSSCT00025004835	3226	8	-23	1036	-23	-1036	multi-exon	TRUE	canonical	NA	NA	NA	NA	NA	NA	NA	TRUE	NA	NA	NA	A	coding	439	1320	241	1560	637601	688654	FALSE	15	CACCTGGCTGTCCCTCAACC	NA	NA	NA	NA	AATAAA	-21_x000D_
PB.5836.1	LUXX01011191.1	-	1599	9	novel_in_catalog	ENSSSCG00025003788	novel	1541	9	NA	NA	-5	27	intron_retention	FALSE	non_canonical	NA	NA	NA	NA	NA	NA	NA	TRUE	NA	NA	NA	A	coding	307	924	78	1001	742337	720650	TRUE	30	TTATACCATTCCTAAACCTG	NA	NA	NA	NA	AATAAA	-19_x000D_
PB.5837.1	LUXX01011191.1	+	4832	7	full-splice_match	ENSSSCG00025003981	ENSSSCT00025005277	5011	7	25	154	-19	1	multi-exon	FALSE	canonical	NA	NA	NA	NA	NA	NA	NA	TRUE	NA	NA	NA	C	coding	379	1140	93	1232	881459	922965	FALSE	15	AAGTGTTTTTGTCATCTTTG	NA	NA	NA	NA	ATTAAA	-14_x000D_
PB.5837.2	LUXX01011191.1	+	3776	7	full-splice_match	ENSSSCG00025003981	ENSSSCT00025005277	5011	7	29	1206	-15	598	multi-exon	FALSE	canonical	NA	NA	NA	NA	NA	NA	NA	TRUE	NA	NA	NA	C	coding	379	1140	89	1228	881459	922965	FALSE	75	AAGAAAAAGAAAAAAAATGT	NA	NA	NA	NA	NA	NA_x000D_
PB.5838.1	LUXX01011191.1	+	3887	15	full-splice_match	ENSSSCG00025004108	ENSSSCT00025005491	5160	15	-33	1306	-33	124	multi-exon	FALSE	canonical	NA	NA	NA	NA	NA	NA	NA	TRUE	NA	NA	NA	C	coding	1135	3408	65	3472	929848	953072	FALSE	45	AATAACAAGAGGTAGGACTG	NA	NA	NA	NA	ATTAAA	-3_x000D_
PB.5838.2	LUXX01011191.1	+	4183	15	full-splice_match	ENSSSCG00025004108	ENSSSCT00025005491	5160	15	0	977	0	168	multi-exon	FALSE	canonical	NA	NA	NA	NA	NA	NA	NA	TRUE	NA	NA	NA	C	coding	1135	3408	32	3439	929848	953072	FALSE	90	AAAAATGAAAAAAAAAAAAA	NA	NA	NA	NA	NA	NA_x000D_
PB.5838.3	LUXX01011191.1	+	4008	15	full-splice_match	ENSSSCG00025004108	ENSSSCT00025005491	5160	15	0	1152	0	-7	multi-exon	FALSE	canonical	NA	NA	NA	NA	NA	NA	NA	TRUE	NA	NA	NA	C	coding	1135	3408	32	3439	929848	953072	FALSE	10	AAGTTTCCTTGTGCTCCTTT	NA	NA	NA	NA	AATAAA	-13_x000D_
PB.5838.4	LUXX01011191.1	+	3849	14	full-splice_match	ENSSSCG00025004108	ENSSSCT00025005505	3837	14	-5	-7	2	7	multi-exon	FALSE	canonical	NA	NA	NA	NA	NA	NA	NA	TRUE	NA	NA	NA	C	coding	1078	3237	30	3266	929848	953072	FALSE	0	TCCTTTGGGTTGTGTTTCTT	NA	NA	NA	NA	AATAAA	-27_x000D_
PB.5839.1	LUXX01011191.1	+	2919	11	full-splice_match	ENSSSCG00025004253	ENSSSCT00025005656	3406	11	2	485	2	-485	multi-exon	FALSE	canonical	NA	NA	NA	NA	NA	NA	NA	TRUE	NA	NA	NA	C	coding	681	2046	565	2610	1044063	1058070	FALSE	15	GATAGCTTGTGATTTTTTTT	NA	NA	NA	NA	NA	NA_x000D_
PB.5839.2	LUXX01011191.1	+	3320	11	full-splice_match	ENSSSCG00025004253	ENSSSCT00025005656	3406	11	84	2	84	-2	multi-exon	FALSE	canonical	NA	NA	NA	NA	NA	NA	NA	TRUE	NA	NA	NA	C	coding	681	2046	483	2528	1044063	1058070	FALSE	25	AGAAAACTTGTTCTTGTGTT	NA	NA	NA	NA	AATAAA	-20_x000D_
PB.5839.3	LUXX01011191.1	+	2977	11	full-splice_match	ENSSSCG00025004253	ENSSSCT00025005656	3406	11	84	345	84	-345	multi-exon	FALSE	canonical	NA	NA	NA	NA	NA	NA	NA	TRUE	NA	NA	NA	C	coding	681	2046	483	2528	1044063	1058070	FALSE	20	CCCTTGTAGTCTCTTAGAGA	NA	NA	NA	NA	AATAAA	-18_x000D_
PB.5839.4	LUXX01011191.1	+	2533	2	incomplete-splice_match	ENSSSCG00025004253	ENSSSCT00025005656	3406	11	84	12751	84	-12751	intron_retention	FALSE	canonical	NA	NA	NA	NA	NA	NA	NA	TRUE	NA	NA	NA	C	coding	121	366	483	848	1044063	1044428	FALSE	90	AAAAAGCAAAAAAAAAAAAA	NA	NA	NA	NA	NA	NA_x000D_
PB.5839.5	LUXX01011191.1	+	2278	7	incomplete-splice_match	ENSSSCG00025004253	ENSSSCT00025005656	3406	11	7363	0	7363	0	5prime_fragment	FALSE	canonical	NA	NA	NA	NA	NA	NA	NA	TRUE	NA	NA	NA	C	coding	467	1404	81	1484	1050475	1058070	FALSE	20	AAAACTTGTTCTTGTGTTTT	NA	NA	NA	NA	AATAAA	-22_x000D_
PB.5840.1	LUXX01011191.1	-	3312	9	incomplete-splice_match	ENSSSCG00025004317	ENSSSCT00025005760	5988	10	13970	-1	13970	1	5prime_fragment	FALSE	canonical	NA	NA	NA	NA	NA	NA	NA	TRUE	NA	NA	NA	A	coding	745	2238	26	2263	1152806	1131640	FALSE	45	AAAAAATTAACTTGTGTTCA	NA	NA	NA	NA	TTTAAA	-35_x000D_
PB.6633.1	LUXX01011303.1	+	2127	4	novel_not_in_catalog	ENSSSCG00025001107	novel	2259	5	NA	NA	-5	-29	at_least_one_novel_splicesite	FALSE	canonical	NA	NA	NA	NA	NA	NA	NA	TRUE	NA	NA	NA	A	coding	288	867	91	957	625075	629467	FALSE	70	AAAAAAAAAATAAACAGTTC	NA	NA	NA	NA	NA	NA_x000D_
PB.6634.1	LUXX01011303.1	-	2789	23	novel_not_in_catalog	ENSSSCG00025001849	novel	2925	23	NA	NA	-380	0	intron_retention	FALSE	canonical	NA	NA	NA	NA	NA	NA	NA	TRUE	NA	NA	NA	A	coding	780	2343	56	2398	654798	632110	FALSE	5	CTTCTGGTTCTCCTGTTATC	NA	NA	NA	NA	AATAAA	-19_x000D_
PB.2784.1	LUXX01011323.1	-	2564	10	incomplete-splice_match	ENSSSCG00025003906	ENSSSCT00025005261	6468	13	27821	7995	67	1	internal_fragment	FALSE	canonical	NA	NA	NA	NA	NA	NA	NA	TRUE	NA	NA	NA	A	coding	399	1200	130	1329	95595	66578	FALSE	30	AAGGATTGTGTGCACATATG	NA	NA	NA	NA	AATAAA	-20_x000D_
PB.2785.1	LUXX01011323.1	+	3105	2	incomplete-splice_match	ENSSSCG00025004224	ENSSSCT00025005600	3029	3	-3	1	-3	-1	intron_retention	FALSE	canonical	NA	NA	NA	NA	NA	NA	NA	TRUE	NA	NA	NA	B	coding	482	1449	70	1518	188270	199655	FALSE	10	TGTTTTACTTATGTGCTTGC	NA	NA	NA	NA	ATTAAA	-15_x000D_
PB.2785.2	LUXX01011323.1	+	2944	2	incomplete-splice_match	ENSSSCG00025004224	ENSSSCT00025005600	3029	3	2	157	2	-154	intron_retention	FALSE	canonical	NA	NA	NA	NA	NA	NA	NA	TRUE	NA	NA	NA	B	coding	482	1449	65	1513	188270	199655	FALSE	35	AAAGTAAGAGCACTCCCCTC	NA	NA	NA	NA	AATAAA	-17_x000D_
PB.2786.1	LUXX01011323.1	+	2605	11	incomplete-splice_match	ENSSSCG00025005125	ENSSSCT00025006911	4468	18	-4	47074	-4	-2	3prime_fragment	FALSE	canonical	NA	NA	NA	NA	NA	NA	NA	TRUE	NA	NA	NA	A	coding	268	807	20	826	1500683	1530071	FALSE	35	AAGCAGTTTGATGGATTAAG	NA	NA	NA	NA	AATAAA	-20_x000D_
PB.2787.1	LUXX01011323.1	-	1767	9	novel_not_in_catalog	ENSSSCG00025005181	novel	1811	9	NA	NA	0	0	at_least_one_novel_splicesite	FALSE	canonical	NA	NA	NA	NA	NA	NA	NA	TRUE	NA	NA	NA	A	coding	319	960	62	1021	1547481	1539252	FALSE	20	TTTACTTCTTTTAGTGGGAA	NA	NA	NA	NA	AATAAA	-18_x000D_
PB.2788.1	LUXX01011323.1	-	2559	2	full-splice_match	ENSSSCG00025005397	ENSSSCT00025007259	3344	2	782	3	782	-3	multi-exon	FALSE	canonical	NA	NA	NA	NA	NA	NA	NA	TRUE	NA	NA	NA	A	coding	317	954	89	1042	2208937	2205963	FALSE	25	TAAGATCTGAGTATGTTTTC	NA	NA	NA	NA	AATAAA	-12_x000D_
PB.2789.1	LUXX01011323.1	+	4289	15	incomplete-splice_match	ENSSSCG00025005465	ENSSSCT00025007344	6036	27	37567	0	37567	0	5prime_fragment	TRUE	canonical	NA	NA	NA	NA	NA	NA	NA	TRUE	NA	NA	NA	A	coding	369	1110	909	2018	2377506	2390623	FALSE	15	TTTTCTGGGTAGCATAGTCG	NA	NA	NA	NA	AATAAA	-13_x000D_
PB.2790.1	LUXX01011323.1	+	7236	38	full-splice_match	ENSSSCG00025005802	ENSSSCT00025007959	8366	38	-59	1189	-30	0	multi-exon	TRUE	canonical	NA	NA	NA	NA	NA	NA	NA	TRUE	NA	NA	NA	C	coding	1849	5550	292	5841	2462097	2571186	FALSE	40	TAAAATATATGCAACTGTGT	NA	NA	NA	NA	AATAAA	-16_x000D_
PB.2790.2	LUXX01011323.1	+	2942	20	incomplete-splice_match	ENSSSCG00025005802	ENSSSCT00025007959	8366	38	-55	39049	-26	-37860	3prime_fragment	FALSE	canonical	NA	NA	NA	NA	NA	NA	NA	TRUE	NA	NA	NA	C	coding	885	2655	288	2942	2462097	2534721	FALSE	65	AAAAAAGAAGAGAATACACT	NA	NA	NA	NA	ATTAAA	-32_x000D_
PB.2790.3	LUXX01011323.1	+	3063	2	incomplete-splice_match	ENSSSCG00025005802	ENSSSCT00025007925	7059	37	-5	91711	-5	-91711	3prime_fragment	FALSE	canonical	NA	NA	NA	NA	NA	NA	NA	TRUE	NA	NA	NA	C	coding	121	366	1	366	2461831	2478173	FALSE	85	TAAAAAGAAAAAAAAAAAGA	NA	NA	NA	NA	NA	NA_x000D_
PB.2790.4	LUXX01011323.1	+	1788	1	novel_in_catalog	ENSSSCG00025005802	novel	7059	37	NA	NA	42770	-66159	mono-exon_by_intron_retention	FALSE	NA	NA	NA	NA	NA	NA	NA	NA	NA	NA	NA	NA	C	non_coding	NA	NA	NA	NA	NA	NA	NA	90	AAAAAAAAAAAGAAAAAGAA	NA	NA	NA	NA	NA	NA_x000D_
PB.2791.1	LUXX01011323.1	-	1331	1	antisense	novelGene_ENSSSCG00025005802_AS	novel	NA	NA	NA	NA	NA	NA	mono-exon	FALSE	NA	NA	NA	NA	NA	NA	NA	NA	NA	NA	NA	NA	A	non_coding	NA	NA	NA	NA	NA	NA	NA	100	AAAAAAAAAAAAAAAAAAAA	NA	NA	NA	NA	NA	NA_x000D_
PB.2792.1	LUXX01011323.1	+	3874	6	novel_not_in_catalog	ENSSSCG00025006342	novel	4160	6	NA	NA	-36733	-91	intron_retention	FALSE	canonical	NA	NA	NA	NA	NA	NA	NA	TRUE	NA	NA	NA	B	coding	316	951	221	1171	2766810	2854361	FALSE	20	TAACTGTGCTGTAATTTTTT	NA	NA	NA	NA	ATTAAA	-30_x000D_
PB.2792.2	LUXX01011323.1	+	3822	6	novel_in_catalog	ENSSSCG00025006342	novel	7147	7	NA	NA	101	2	intron_retention	FALSE	canonical	NA	NA	NA	NA	NA	NA	NA	TRUE	NA	NA	NA	B	coding	278	837	190	1026	2803649	2854361	FALSE	10	TCTAGGTGTACTTTGTCTGT	NA	NA	NA	NA	AATAAA	-15_x000D_
PB.2793.1	LUXX01011323.1	-	5363	25	novel_in_catalog	ENSSSCG00025006527	novel	3546	28	NA	NA	-11	-1655	combination_of_known_junctions	TRUE	canonical	NA	NA	NA	NA	NA	NA	NA	TRUE	NA	NA	NA	B	coding	1019	3060	85	3144	3039017	2928197	FALSE	15	ACCTCTGGAGTTTGCATTTG	NA	NA	NA	NA	AATAAA	-14_x000D_
PB.2793.2	LUXX01011323.1	-	3342	25	novel_in_catalog	ENSSSCG00025006527	novel	3546	28	NA	NA	3	103	combination_of_known_junctions	FALSE	canonical	NA	NA	NA	NA	NA	NA	NA	TRUE	NA	NA	NA	B	coding	1019	3060	52	3111	3039017	2928197	FALSE	35	TAAAAATTTTCTTTTCATTA	NA	NA	NA	NA	AATACA	-17_x000D_
PB.2793.3	LUXX01011323.1	-	3232	25	novel_in_catalog	ENSSSCG00025006527	novel	3546	28	NA	NA	-4	-20	combination_of_known_junctions	FALSE	canonical	NA	NA	NA	NA	NA	NA	NA	TRUE	NA	NA	NA	B	coding	1019	3060	65	3124	3039017	2928197	FALSE	90	AAACAGAAAAAAAAAAAAAA	NA	NA	NA	NA	NA	NA_x000D_
PB.2793.4	LUXX01011323.1	-	3183	25	novel_not_in_catalog	ENSSSCG00025006527	novel	3546	28	NA	NA	270	-20	at_least_one_novel_splicesite	FALSE	canonical	NA	NA	NA	NA	NA	NA	NA	TRUE	NA	NA	NA	B	coding	978	2937	139	3075	3003074	2928197	FALSE	90	AAACAGAAAAAAAAAAAAAA	NA	NA	NA	NA	NA	NA_x000D_
PB.2793.6	LUXX01011323.1	-	1587	3	incomplete-splice_match	ENSSSCG00025006527	ENSSSCT00025008846	6438	24	-9	71356	-3	-71356	3prime_fragment	FALSE	canonical	NA	NA	NA	NA	NA	NA	NA	TRUE	NA	NA	NA	B	coding	164	495	64	558	3039017	3000454	FALSE	85	AAAAAAAAAAACCAAACAAA	NA	NA	NA	NA	AATAGA	-37_x000D_
PB.4407.1	LUXX01011524.1	+	6484	8	novel_in_catalog	ENSSSCG00025007530	novel	6237	10	NA	NA	-7	104	combination_of_known_junctions	TRUE	canonical	NA	NA	NA	NA	NA	NA	NA	TRUE	NA	NA	NA	B	coding	235	708	224	931	158216	226310	TRUE	45	AAAAAAAAGTCTGGGGTGAC	NA	NA	NA	NA	ATTAAA	-12_x000D_
PB.4407.2	LUXX01011524.1	+	1798	2	incomplete-splice_match	ENSSSCG00025007530	ENSSSCT00025010016	6237	10	-9	72715	-9	-66496	3prime_fragment	FALSE	canonical	NA	NA	NA	NA	NA	NA	NA	TRUE	NA	NA	NA	B	coding	106	321	1244	1564	159260	159580	FALSE	85	AAAAAAGAAAAAGAAAAAAG	NA	NA	NA	NA	NA	NA_x000D_
PB.4407.3	LUXX01011524.1	+	3164	8	novel_in_catalog	ENSSSCG00025007530	novel	6237	10	NA	NA	-6	-3040	combination_of_known_junctions	FALSE	canonical	NA	NA	NA	NA	NA	NA	NA	TRUE	NA	NA	NA	B	coding	235	708	197	904	158216	226310	TRUE	35	AATAGGAAACCTTTGCATTT	NA	NA	NA	NA	NA	NA_x000D_
PB.4407.4	LUXX01011524.1	+	6490	8	novel_in_catalog	ENSSSCG00025007530	novel	6375	9	NA	NA	0	104	combination_of_known_junctions	FALSE	canonical	NA	NA	NA	NA	NA	NA	NA	TRUE	NA	NA	NA	B	coding	248	747	191	937	158216	226310	TRUE	45	AAAAAAAAGTCTGGGGTGAC	NA	NA	NA	NA	ATTAAA	-12_x000D_
PB.4408.1	LUXX01011524.1	-	2604	11	incomplete-splice_match	ENSSSCG00025007611	ENSSSCT00025010110	3955	13	9	3625	9	1083	3prime_fragment	FALSE	canonical	NA	NA	NA	NA	NA	NA	NA	TRUE	NA	NA	NA	A	coding	427	1284	238	1521	240426	235349	FALSE	10	GAGGAGCTTCTTTTTCCTGT	NA	NA	NA	NA	AATAAA	-21_x000D_
PB.4409.1	LUXX01011524.1	+	4680	16	incomplete-splice_match	ENSSSCG00025011849	ENSSSCT00025016226	2242	18	5	0	0	0	intron_retention	FALSE	canonical	NA	NA	NA	NA	NA	NA	NA	TRUE	NA	NA	NA	B	coding	674	2025	55	2079	1102575	1244892	FALSE	5	TGTCCGTTCCCTCGTTCATT	NA	NA	NA	NA	AATAAA	-16_x000D_
PB.4409.2	LUXX01011524.1	+	2147	16	incomplete-splice_match	ENSSSCG00025011849	ENSSSCT00025016226	2242	18	5	2533	0	5	3prime_fragment	FALSE	canonical	NA	NA	NA	NA	NA	NA	NA	TRUE	NA	NA	NA	B	coding	674	2025	55	2079	1102575	1244892	FALSE	10	AGCTACCTGCCCCTCGTGCC	NA	NA	NA	NA	AATAAA	-28_x000D_
PB.4410.1	LUXX01011524.1	-	1232	5	full-splice_match	ENSSSCG00025012979	ENSSSCT00025017734	1498	5	268	-2	-186	0	multi-exon	FALSE	canonical	NA	NA	NA	NA	NA	NA	NA	TRUE	NA	NA	NA	A	coding	258	777	64	840	1298845	1294377	FALSE	5	CCTTCTCTCGTGCTTGTGAC	NA	NA	NA	NA	AATAAA	-19_x000D_
PB.4411.1	LUXX01011524.1	+	1601	6	novel_not_in_catalog	ENSSSCG00025013891	novel	869	7	NA	NA	271	-2	intron_retention	FALSE	canonical	NA	NA	NA	NA	NA	NA	NA	TRUE	NA	NA	NA	A	coding	121	366	957	1322	1398070	1399685	FALSE	10	CCCCATGTCTGTTCTCTATT	NA	NA	NA	NA	AATAAA	-20_x000D_
PB.4412.1	LUXX01011524.1	+	1141	5	incomplete-splice_match	ENSSSCG00025014093	ENSSSCT00025018828	1034	6	-6	-2	-6	1	intron_retention	FALSE	canonical	NA	NA	NA	NA	NA	NA	NA	TRUE	NA	NA	NA	A	coding	161	486	132	617	1406015	1411334	FALSE	5	TGTGTGCTGGTTCCAGCCCC	NA	NA	NA	NA	GATAAA	-16_x000D_
PB.4413.1	LUXX01011524.1	+	7176	26	novel_in_catalog	ENSSSCG00025014651	novel	8135	26	NA	NA	76	1	intron_retention	TRUE	canonical	NA	NA	NA	NA	NA	NA	NA	TRUE	NA	NA	NA	A	coding	2102	6309	180	6488	1465074	1493572	FALSE	15	AGTGCTGACCTGCCTTGACC	NA	NA	NA	NA	AATAAA	-19_x000D_
PB.4414.1	LUXX01011524.1	-	1960	1	novel_in_catalog	ENSSSCG00025015080	novel	7382	14	NA	NA	2	-101037	mono-exon	FALSE	NA	NA	NA	NA	NA	NA	NA	NA	NA	NA	NA	NA	A	non_coding	NA	NA	NA	NA	NA	NA	NA	85	AAAAAAAAAAGAAAGAAAGA	NA	NA	NA	NA	AAGAAA	-10_x000D_
PB.4415.1	LUXX01011524.1	+	2992	10	novel_not_in_catalog	ENSSSCG00025015335	novel	3135	10	NA	NA	137	8	at_least_one_novel_splicesite	FALSE	canonical	NA	NA	NA	NA	NA	NA	NA	TRUE	NA	NA	NA	A	coding	399	1200	199	1398	1601943	1615140	FALSE	45	AAGAAAAGATGTGTAATCTT	NA	NA	NA	NA	AATAAA	-10_x000D_
PB.4416.1	LUXX01011524.1	-	3837	20	incomplete-splice_match	ENSSSCG00025016150	ENSSSCT00025022569	7149	32	-11	29183	3	-29113	3prime_fragment	FALSE	canonical	NA	NA	NA	NA	NA	NA	NA	TRUE	NA	NA	NA	B	coding	919	2760	192	2951	1750260	1696735	FALSE	15	TCTGGAGGTGGTTGTGTATA	NA	NA	NA	NA	ATTAAA	-21_x000D_
PB.4416.2	LUXX01011524.1	-	3535	20	incomplete-splice_match	ENSSSCG00025016150	ENSSSCT00025022569	7149	32	18	29456	2	-29386	3prime_fragment	FALSE	canonical	NA	NA	NA	NA	NA	NA	NA	TRUE	NA	NA	NA	B	coding	919	2760	163	2922	1750260	1696735	FALSE	45	AAAGGTTTGTAATCAAATAT	NA	NA	NA	NA	AATAAA	-23_x000D_
PB.4417.1	LUXX01011524.1	+	1745	7	novel_in_catalog	ENSSSCG00025017109	novel	1875	8	NA	NA	1	0	intron_retention	FALSE	canonical	NA	NA	NA	NA	NA	NA	NA	TRUE	NA	NA	NA	A	coding	250	753	106	858	1778320	1789825	FALSE	20	CCCAACAGTCTGCGCTAGGC	NA	NA	NA	NA	AATAAA	-18_x000D_
PB.4418.1	LUXX01011524.1	-	1257	2	novel_in_catalog	ENSSSCG00025017396	novel	2362	3	NA	NA	-256	1	intron_retention	FALSE	canonical	NA	NA	NA	NA	NA	NA	NA	TRUE	NA	NA	NA	A	coding	191	576	110	685	1792483	1791908	FALSE	0	GCCCTGGCTCCTCCCTGTGT	NA	NA	NA	NA	AATAAA	-18_x000D_
PB.4419.1	LUXX01011524.1	+	4068	12	incomplete-splice_match	ENSSSCG00025017570	ENSSSCT00025023801	3889	13	544	-2	8	1	5prime_fragment	TRUE	canonical	NA	NA	NA	NA	NA	NA	NA	TRUE	NA	NA	NA	A	coding	685	2058	609	2666	1817426	2017500	FALSE	15	AACCTCTGCTGGCCTTGATT	NA	NA	NA	NA	AATAAA	-17_x000D_
PB.4420.1	LUXX01011524.1	+	3032	19	novel_in_catalog	ENSSSCG00025017785	novel	5592	20	NA	NA	-2	-2	combination_of_known_junctions	TRUE	canonical	NA	NA	NA	NA	NA	NA	NA	TRUE	NA	NA	NA	B	coding	791	2376	218	2593	2020613	2058836	FALSE	35	AAGTGATTGTGTGAGACTAA	NA	NA	NA	NA	AATAAA	-16_x000D_
PB.4420.2	LUXX01011524.1	+	3696	19	novel_in_catalog	ENSSSCG00025017785	novel	5592	20	NA	NA	0	664	combination_of_known_junctions	FALSE	canonical	NA	NA	NA	NA	NA	NA	NA	TRUE	NA	NA	NA	B	coding	791	2376	216	2591	2020613	2058836	FALSE	20	AATATGTGTTCTTATCTGTC	NA	NA	NA	NA	CATAAA	-12_x000D_
PB.4420.3	LUXX01011524.1	+	2738	19	novel_in_catalog	ENSSSCG00025017785	novel	5592	20	NA	NA	1	-275	combination_of_known_junctions	FALSE	canonical	NA	NA	NA	NA	NA	NA	NA	TRUE	NA	NA	NA	B	coding	791	2376	215	2590	2020613	2058836	FALSE	45	AAAGCGTGAAAGTAATGATT	NA	NA	NA	NA	TTTAAA	-16_x000D_
PB.4420.4	LUXX01011524.1	+	3862	19	novel_in_catalog	ENSSSCG00025017785	novel	5592	20	NA	NA	32	862	combination_of_known_junctions	FALSE	canonical	NA	NA	NA	NA	NA	NA	NA	TRUE	NA	NA	NA	B	coding	791	2376	184	2559	2020613	2058836	FALSE	20	GCCCAAGTTTCCCTTCGAAT	NA	NA	NA	NA	NA	NA_x000D_
PB.4194.1	LUXX01011536.1	-	3684	18	novel_in_catalog	ENSSSCG00025018173	novel	6572	18	NA	NA	0	0	combination_of_known_junctions	FALSE	canonical	NA	NA	NA	NA	NA	NA	NA	TRUE	NA	NA	NA	C	coding	798	2397	423	2819	47358	37099	FALSE	15	TAATGAGGCGGGTGGGGTCT	NA	NA	NA	NA	AATAAA	-12_x000D_
PB.4194.2	LUXX01011536.1	-	3443	18	full-splice_match	ENSSSCG00025018173	ENSSSCT00025024811	3864	18	421	0	0	0	multi-exon	FALSE	canonical	NA	NA	NA	NA	NA	NA	NA	TRUE	NA	NA	NA	C	coding	825	2478	101	2578	46479	37099	FALSE	15	TAATGAGGCGGGTGGGGTCT	NA	NA	NA	NA	AATAAA	-12_x000D_
PB.4195.1	LUXX01011536.1	-	5240	9	novel_in_catalog	ENSSSCG00025018567	novel	1814	10	NA	NA	0	3387	intron_retention	FALSE	canonical	NA	NA	NA	NA	NA	NA	NA	TRUE	NA	NA	NA	B	coding	354	1065	109	1173	121672	76253	TRUE	25	CCTGGAAATACGTATTTTTT	NA	NA	NA	NA	AATAAA	-16_x000D_
PB.4195.2	LUXX01011536.1	-	3806	9	novel_in_catalog	ENSSSCG00025018567	novel	1814	10	NA	NA	26	1979	intron_retention	FALSE	canonical	NA	NA	NA	NA	NA	NA	NA	TRUE	NA	NA	NA	B	coding	354	1065	83	1147	121672	76253	TRUE	30	AACAACAGCTTTATTTTTTT	NA	NA	NA	NA	AATAAA	-34_x000D_
PB.4195.3	LUXX01011536.1	-	3113	9	novel_in_catalog	ENSSSCG00025018567	novel	1814	10	NA	NA	0	1260	intron_retention	FALSE	canonical	NA	NA	NA	NA	NA	NA	NA	TRUE	NA	NA	NA	B	coding	354	1065	109	1173	121672	76253	TRUE	45	AAAAATGAGAACTGCTGGAG	NA	NA	NA	NA	AATACA	-12_x000D_
PB.4195.4	LUXX01011536.1	-	2386	9	novel_in_catalog	ENSSSCG00025018567	novel	1814	10	NA	NA	0	533	intron_retention	FALSE	canonical	NA	NA	NA	NA	NA	NA	NA	TRUE	NA	NA	NA	B	coding	354	1065	109	1173	121672	76253	TRUE	10	CAGGTTTGTTCCTGTTTGTA	NA	NA	NA	NA	ATTAAA	-18_x000D_
PB.4195.5	LUXX01011536.1	-	1856	9	novel_in_catalog	ENSSSCG00025018567	novel	1814	10	NA	NA	0	3	intron_retention	FALSE	canonical	NA	NA	NA	NA	NA	NA	NA	TRUE	NA	NA	NA	B	coding	354	1065	109	1173	121672	76253	TRUE	30	AATAAGATTCTAGCTCTCTC	NA	NA	NA	NA	NA	NA_x000D_
PB.4195.6	LUXX01011536.1	-	1737	9	novel_in_catalog	ENSSSCG00025018567	novel	1814	10	NA	NA	3	-113	intron_retention	FALSE	canonical	NA	NA	NA	NA	NA	NA	NA	TRUE	NA	NA	NA	B	coding	354	1065	106	1170	121672	76253	TRUE	20	AATTCTTTGTAGTTATTGGG	NA	NA	NA	NA	AATATA	-19_x000D_
PB.4195.7	LUXX01011536.1	-	1230	8	novel_in_catalog	ENSSSCG00025018567	novel	1814	10	NA	NA	-16	-729	intron_retention	FALSE	canonical	NA	NA	NA	NA	NA	NA	NA	TRUE	NA	NA	NA	B	coding	354	1065	125	1189	121672	76253	FALSE	30	ATTTATAGTGCTGTAATGAT	NA	NA	NA	NA	AATAAA	-22_x000D_
PB.4196.1	LUXX01011536.1	-	3205	3	full-splice_match	ENSSSCG00025018757	ENSSSCT00025025443	3232	3	9	18	9	-18	multi-exon	FALSE	canonical	NA	NA	NA	NA	NA	NA	NA	TRUE	NA	NA	NA	C	coding	229	690	40	729	178583	176813	FALSE	90	AAAAAAAAAAAAAAAAAAGC	NA	NA	NA	NA	NA	NA_x000D_
PB.4196.2	LUXX01011536.1	-	3176	2	full-splice_match	ENSSSCG00025018757	ENSSSCT00025025465	3194	2	0	18	0	-18	multi-exon	FALSE	canonical	NA	NA	NA	NA	NA	NA	NA	TRUE	NA	NA	NA	C	coding	163	492	209	700	177304	176813	FALSE	90	AAAAAAAAAAAAAAAAAAGC	NA	NA	NA	NA	NA	NA_x000D_
PB.4197.1	LUXX01011536.1	-	2428	11	full-splice_match	ENSSSCG00025018832	ENSSSCT00025025566	2424	11	-6	2	-6	-2	multi-exon	FALSE	canonical	NA	NA	NA	NA	NA	NA	NA	TRUE	NA	NA	NA	C	coding	744	2235	63	2297	188730	180107	FALSE	15	AAGACTGTCTCCCTGTTCTG	NA	NA	NA	NA	AAGAAA	-22_x000D_
PB.4197.2	LUXX01011536.1	-	2861	11	novel_not_in_catalog	ENSSSCG00025018832	novel	2424	11	NA	NA	19	-3	at_least_one_novel_splicesite	FALSE	canonical	NA	NA	NA	NA	NA	NA	NA	TRUE	NA	NA	NA	C	coding	389	1170	38	1207	188730	183292	TRUE	15	CAAGACTGTCTCCCTGTTCT	NA	NA	NA	NA	AAGAAA	-21_x000D_
PB.4198.1	LUXX01011536.1	+	1024	9	novel_not_in_catalog	ENSSSCG00025018990	novel	1133	10	NA	NA	33025	26	at_least_one_novel_splicesite	FALSE	canonical	NA	NA	NA	NA	NA	NA	NA	TRUE	NA	NA	NA	B	coding	241	726	114	839	238605	260199	FALSE	30	TAATGCAGCCTCTTGTATAA	NA	NA	NA	NA	AATAAA	-39_x000D_
PB.4198.2	LUXX01011536.1	+	964	9	novel_not_in_catalog	ENSSSCG00025018990	novel	1133	10	NA	NA	33423	-3	at_least_one_novel_splicesite	FALSE	canonical	NA	NA	NA	NA	NA	NA	NA	TRUE	NA	NA	NA	B	coding	232	699	110	808	238999	260199	FALSE	45	AAAATATTTGTTAATAGACG	NA	NA	NA	NA	AATAAA	-10_x000D_
PB.4199.1	LUXX01011536.1	+	3391	21	novel_not_in_catalog	ENSSSCG00025019105	novel	5089	21	NA	NA	542	-25	at_least_one_novel_splicesite	FALSE	non_canonical	NA	NA	NA	NA	NA	NA	NA	TRUE	NA	NA	NA	A	coding	547	1644	681	2324	308994	329951	FALSE	95	TAAAAAAAAAAAAAAAAAAA	NA	NA	NA	NA	NA	NA_x000D_
PB.4200.1	LUXX01011536.1	+	1654	8	full-splice_match	ENSSSCG00025019392	ENSSSCT00025026298	1913	8	273	-14	-47	-6	multi-exon	FALSE	canonical	NA	NA	NA	NA	NA	NA	NA	TRUE	NA	NA	NA	A	coding	326	981	80	1060	357178	359632	FALSE	45	TAAATGTGAAAGGAAATCCT	NA	NA	NA	NA	AATAAA	-25_x000D_
PB.4201.1	LUXX01011536.1	-	1878	11	full-splice_match	ENSSSCG00025011066	ENSSSCT00025014507	2491	11	19	594	19	16	multi-exon	TRUE	canonical	NA	NA	NA	NA	NA	NA	NA	TRUE	NA	NA	NA	A	coding	514	1545	90	1634	417772	400531	FALSE	15	AATCTTCTGCCCAGGGCCGG	NA	NA	NA	NA	AATAAA	-32_x000D_
PB.4202.1	LUXX01011536.1	-	2804	3	novel_in_catalog	ENSSSCG00025011616	novel	2578	4	NA	NA	-27	47	intron_retention	FALSE	canonical	NA	NA	NA	NA	NA	NA	NA	TRUE	NA	NA	NA	B	coding	74	225	124	348	514281	511227	FALSE	25	ATTTTGGCCATTTGTCAAAT	NA	NA	NA	NA	AATAAA	-16_x000D_
PB.4202.3	LUXX01011536.1	-	1263	3	novel_in_catalog	ENSSSCG00025011616	novel	2578	4	NA	NA	-20	-1487	intron_retention	FALSE	canonical	NA	NA	NA	NA	NA	NA	NA	TRUE	NA	NA	NA	B	coding	74	225	117	341	514281	511227	FALSE	35	TAGTAAAGTTATCTGGAATT	NA	NA	NA	NA	AATAAA	-27_x000D_
PB.4203.1	LUXX01011536.1	+	1726	4	full-splice_match	ENSSSCG00025011673	ENSSSCT00025015415	1787	4	-16	77	-15	1	multi-exon	FALSE	canonical	NA	NA	NA	NA	NA	NA	NA	TRUE	NA	NA	NA	C	coding	124	375	42	416	523876	533631	FALSE	35	TAATACTTGAATTTGACTAT	NA	NA	NA	NA	AATAAA	-21_x000D_
PB.4203.2	LUXX01011536.1	+	1568	4	full-splice_match	ENSSSCG00025011673	ENSSSCT00025015415	1787	4	-2	221	-1	-142	multi-exon	FALSE	canonical	NA	NA	NA	NA	NA	NA	NA	TRUE	NA	NA	NA	C	coding	124	375	28	402	523876	533631	FALSE	50	AAAAGGATCATTGAATATTA	NA	NA	NA	NA	ATTAAA	-10_x000D_
PB.4204.1	LUXX01011536.1	+	3735	14	novel_not_in_catalog	ENSSSCG00025011840	novel	4192	14	NA	NA	64	2	at_least_one_novel_splicesite	TRUE	canonical	NA	NA	NA	NA	NA	NA	NA	TRUE	NA	NA	NA	B	coding	657	1974	557	2530	583257	618740	FALSE	20	AAAACTGTTCCTGTTCCTTG	NA	NA	NA	NA	AATAAA	-16_x000D_
PB.4204.2	LUXX01011536.1	+	4189	14	novel_not_in_catalog	ENSSSCG00025011840	novel	4192	14	NA	NA	68	1	at_least_one_novel_splicesite	FALSE	canonical	NA	NA	NA	NA	NA	NA	NA	TRUE	NA	NA	NA	B	coding	807	2424	562	2985	582807	618740	FALSE	20	TAAAACTGTTCCTGTTCCTT	NA	NA	NA	NA	AATAAA	-15_x000D_
PB.4205.1	LUXX01011536.1	+	3669	11	novel_in_catalog	ENSSSCG00025012194	novel	3982	11	NA	NA	2	-385	intron_retention	FALSE	canonical	NA	NA	NA	NA	NA	NA	NA	TRUE	NA	NA	NA	B	coding	556	1671	168	1838	627532	642092	FALSE	60	AAAAACTAACCTTTAAAAGA	NA	NA	NA	NA	NA	NA_x000D_
PB.4205.2	LUXX01011536.1	+	2216	12	novel_not_in_catalog	ENSSSCG00025012194	novel	4414	12	NA	NA	2	-3	intron_retention	FALSE	canonical	NA	NA	NA	NA	NA	NA	NA	TRUE	NA	NA	NA	B	coding	556	1671	168	1838	627532	642092	TRUE	15	ACATTGTTGTGGTTTGGTAT	NA	NA	NA	NA	AATAAA	-12_x000D_
PB.4205.3	LUXX01011536.1	+	2168	12	novel_not_in_catalog	ENSSSCG00025012194	novel	4414	12	NA	NA	2	5	intron_retention	FALSE	canonical	NA	NA	NA	NA	NA	NA	NA	TRUE	NA	NA	NA	B	coding	556	1671	168	1838	627532	642092	TRUE	5	GTGGTTTGGTATGCTGTCTT	NA	NA	NA	NA	AATAAA	-20_x000D_
PB.4205.4	LUXX01011536.1	+	2650	11	novel_in_catalog	ENSSSCG00025012194	novel	3982	11	NA	NA	8	673	intron_retention	FALSE	canonical	NA	NA	NA	NA	NA	NA	NA	TRUE	NA	NA	NA	B	coding	556	1671	162	1832	627532	642092	FALSE	30	ATGTGAAGTTCTAATTTTTA	NA	NA	NA	NA	AGTAAA	-17_x000D_
PB.4205.5	LUXX01011536.1	+	4034	11	novel_in_catalog	ENSSSCG00025012194	novel	3982	11	NA	NA	-8	-3	intron_retention	FALSE	canonical	NA	NA	NA	NA	NA	NA	NA	TRUE	NA	NA	NA	B	coding	556	1671	151	1821	627532	642092	FALSE	15	ACATTGTTGTGGTTTGGTAT	NA	NA	NA	NA	AATAAA	-12_x000D_
PB.4205.6	LUXX01011536.1	+	3812	11	novel_not_in_catalog	ENSSSCG00025012194	novel	3982	11	NA	NA	0	-3	intron_retention	FALSE	canonical	NA	NA	NA	NA	NA	NA	NA	TRUE	NA	NA	NA	B	coding	394	1185	132	1316	627532	641809	FALSE	15	ACATTGTTGTGGTTTGGTAT	NA	NA	NA	NA	AATAAA	-12_x000D_
PB.4206.1	LUXX01011536.1	-	2933	15	full-splice_match	ENSSSCG00025012336	ENSSSCT00025016300	3146	15	213	0	213	0	multi-exon	TRUE	canonical	NA	NA	NA	NA	NA	NA	NA	TRUE	NA	NA	NA	C	coding	680	2043	308	2350	694424	646286	FALSE	10	CTTTCGGCTCTTTGTGTAAT	NA	NA	NA	NA	AATAAA	-15_x000D_
PB.4206.2	LUXX01011536.1	-	2645	14	novel_in_catalog	ENSSSCG00025012336	novel	3146	15	NA	NA	198	0	combination_of_known_splicesites	FALSE	canonical	NA	NA	NA	NA	NA	NA	NA	TRUE	NA	NA	NA	C	coding	661	1986	77	2062	684322	646286	FALSE	10	CTTTCGGCTCTTTGTGTAAT	NA	NA	NA	NA	AATAAA	-15_x000D_
PB.4207.1	LUXX01011536.1	-	2910	19	novel_in_catalog	ENSSSCG00025013268	novel	2965	21	NA	NA	31	5	intron_retention	FALSE	canonical	NA	NA	NA	NA	NA	NA	NA	TRUE	NA	NA	NA	B	coding	593	1782	64	1845	837220	777820	FALSE	30	CAAAAATTATCTTTGTTTTT	NA	NA	NA	NA	AATAAA	-11_x000D_
PB.4208.1	LUXX01011536.1	-	3731	6	incomplete-splice_match	ENSSSCG00025013268	ENSSSCT00025019600	7642	27	14	104303	6	4842	intron_retention	TRUE	canonical	NA	NA	NA	NA	NA	NA	NA	TRUE	NA	NA	NA	B	coding	547	1644	280	1923	890799	883749	FALSE	25	ATGAAGATGCTATGCTTTTT	NA	NA	NA	NA	ATTAAA	-16_x000D_
PB.4208.2	LUXX01011536.1	-	3117	6	incomplete-splice_match	ENSSSCG00025013268	ENSSSCT00025019600	7642	27	-9	104940	-9	4205	intron_retention	FALSE	canonical	NA	NA	NA	NA	NA	NA	NA	TRUE	NA	NA	NA	B	coding	547	1644	303	1946	890799	883749	FALSE	5	TGATCCTGGGTGTTGCCTTT	NA	NA	NA	NA	AATAAA	-17_x000D_
PB.4208.3	LUXX01011536.1	-	1665	6	incomplete-splice_match	ENSSSCG00025013268	ENSSSCT00025019600	7642	27	2	106381	2	2764	intron_retention	FALSE	canonical	NA	NA	NA	NA	NA	NA	NA	TRUE	NA	NA	NA	B	non_coding	NA	NA	NA	NA	NA	NA	NA	70	AAACATAAAAATGAAAGTAA	NA	NA	NA	NA	NA	NA_x000D_
PB.4209.1	LUXX01011536.1	+	3250	11	novel_not_in_catalog	ENSSSCG00025015118	novel	3644	11	NA	NA	-92	-184	at_least_one_novel_splicesite	FALSE	non_canonical	NA	NA	NA	NA	NA	NA	NA	TRUE	NA	NA	NA	C	coding	477	1434	137	1570	1120736	1169487	TRUE	40	AAAAAGATTCATTGTTCATT	NA	NA	NA	NA	AGTAAA	-15_x000D_
PB.4209.2	LUXX01011536.1	+	3414	11	full-splice_match	ENSSSCG00025015118	ENSSSCT00025020252	3644	11	226	4	-71	1	multi-exon	TRUE	non_canonical	NA	NA	NA	NA	NA	NA	NA	TRUE	NA	NA	NA	C	coding	477	1434	116	1549	1120736	1169487	TRUE	25	GAAATGACTTGTTTCCTCAT	NA	NA	NA	NA	ATTAAA	-23_x000D_
PB.4209.3	LUXX01011536.1	+	3164	11	full-splice_match	ENSSSCG00025015118	ENSSSCT00025020252	3644	11	231	249	-66	-244	multi-exon	FALSE	non_canonical	NA	NA	NA	NA	NA	NA	NA	TRUE	NA	NA	NA	C	coding	477	1434	111	1544	1120736	1169487	TRUE	20	TACATGATTAGCTCTTTTTT	NA	NA	NA	NA	CATAAA	-22_x000D_
PB.4209.4	LUXX01011536.1	+	3521	11	full-splice_match	ENSSSCG00025015118	ENSSSCT00025020252	3644	11	255	-132	-42	132	multi-exon	FALSE	non_canonical	NA	NA	NA	NA	NA	NA	NA	TRUE	NA	NA	NA	C	coding	477	1434	87	1520	1120736	1169487	TRUE	60	ATAACTAAGGCAAAAAAATG	NA	NA	NA	NA	AATAAA	-18_x000D_
PB.4210.1	LUXX01011536.1	-	2247	1	novel_in_catalog	ENSSSCG00025016264	novel	4691	2	NA	NA	7	-4541	mono-exon	FALSE	NA	NA	NA	NA	NA	NA	NA	NA	NA	NA	NA	NA	A	coding	375	1128	17	1144	2236630	2235503	NA	25	TAAGAAGTCTTGTGTACTGT	NA	NA	NA	NA	AATAAA	-34_x000D_
PB.3667.1	LUXX01011673.1	+	1010	3	novel_in_catalog	ENSSSCG00025017481	novel	430	6	NA	NA	3	17	intron_retention	FALSE	canonical	NA	NA	NA	NA	NA	NA	NA	TRUE	NA	NA	NA	A	coding	107	324	35	358	451862	452341	TRUE	5	ACCTCCCTGTCTTTGTTCCT	NA	NA	NA	NA	AATAAA	-17_x000D_
PB.3668.1	LUXX01011673.1	-	759	6	novel_in_catalog	ENSSSCG00025017556	novel	788	7	NA	NA	-3	0	intron_retention	FALSE	canonical	NA	NA	NA	NA	NA	NA	NA	TRUE	NA	NA	NA	A	coding	176	531	84	614	464620	461232	FALSE	15	AATCCCTCTGGATCTCCTCC	NA	NA	NA	NA	AATAAA	-14_x000D_
PB.3669.1	LUXX01011673.1	+	2216	8	novel_in_catalog	ENSSSCG00025017623	novel	3777	11	NA	NA	4973	4	combination_of_known_splicesites	FALSE	canonical	NA	NA	NA	NA	NA	NA	NA	TRUE	NA	NA	NA	B	coding	607	1824	115	1938	484775	495108	FALSE	35	AACCAGTGTATTATCTTGAA	NA	NA	NA	NA	ATTAAA	-13_x000D_
PB.3669.2	LUXX01011673.1	+	2924	9	incomplete-splice_match	ENSSSCG00025017623	ENSSSCT00025023889	3777	11	4985	-4	4985	4	5prime_fragment	FALSE	canonical	NA	NA	NA	NA	NA	NA	NA	TRUE	NA	NA	NA	B	coding	856	2571	76	2646	476093	495108	FALSE	35	AACCAGTGTATTATCTTGAA	NA	NA	NA	NA	ATTAAA	-13_x000D_
PB.3670.1	LUXX01011673.1	-	3433	6	novel_in_catalog	ENSSSCG00025017691	novel	3545	7	NA	NA	-9	3	intron_retention	FALSE	canonical	NA	NA	NA	NA	NA	NA	NA	TRUE	NA	NA	NA	A	coding	234	705	185	889	518536	499996	FALSE	10	AACTTTTGTCCTGGCTTCTT	NA	NA	NA	NA	ATTAAA	-12_x000D_
PB.3671.1	LUXX01011673.1	-	3465	11	novel_not_in_catalog	ENSSSCG00025018430	novel	3409	10	NA	NA	36	-4	at_least_one_novel_splicesite	FALSE	canonical	NA	NA	NA	NA	NA	NA	NA	TRUE	NA	NA	NA	A	coding	425	1278	26	1303	1235600	1219069	FALSE	45	AAAATATTGCCTTTTTAAAA	NA	NA	NA	NA	AATAAA	-9_x000D_
PB.3672.1	LUXX01011673.1	+	2262	2	full-splice_match	ENSSSCG00025018528	ENSSSCT00025025112	2328	2	61	5	61	-5	multi-exon	FALSE	canonical	NA	NA	NA	NA	NA	NA	NA	TRUE	NA	NA	NA	A	non_coding	NA	NA	NA	NA	NA	NA	NA	35	AAAAATCTGTTTTGGAATTC	NA	NA	NA	NA	AATAAA	-25_x000D_
PB.3673.1	LUXX01011673.1	-	5103	12	novel_in_catalog	ENSSSCG00025019000	novel	2860	14	NA	NA	0	-1	intron_retention	FALSE	canonical	NA	NA	NA	NA	NA	NA	NA	TRUE	NA	NA	NA	B	coding	592	1779	158	1936	1587531	1568067	TRUE	15	AGTCTGCTTTGTAGTTTCAT	NA	NA	NA	NA	AATAAA	-22_x000D_
PB.3673.2	LUXX01011673.1	-	2729	13	novel_in_catalog	ENSSSCG00025019000	novel	2860	14	NA	NA	6	-2	intron_retention	FALSE	canonical	NA	NA	NA	NA	NA	NA	NA	TRUE	NA	NA	NA	B	coding	730	2193	152	2344	1587531	1554107	FALSE	20	AATTCAGTCTGCTTTGTAGT	NA	NA	NA	NA	AATAAA	-17_x000D_
PB.3673.3	LUXX01011673.1	-	1344	6	incomplete-splice_match	ENSSSCG00025019000	ENSSSCT00025025844	5292	11	-63	19435	-1	-19435	3prime_fragment	FALSE	canonical	NA	NA	NA	NA	NA	NA	NA	TRUE	NA	NA	NA	B	coding	395	1185	159	1343	1587531	1575331	FALSE	55	AAAGAAAATACTCAGATGAG	NA	NA	NA	NA	NA	NA_x000D_
PB.3674.1	LUXX01011673.1	+	1921	14	novel_in_catalog	ENSSSCG00025019279	novel	1732	13	NA	NA	0	-1	intron_retention	FALSE	canonical	NA	NA	NA	NA	NA	NA	NA	TRUE	NA	NA	NA	A	coding	433	1302	117	1418	1627786	1651523	FALSE	30	TATTAATTTCAGGTCCCCAA	NA	NA	NA	NA	AATAAA	-15_x000D_
PB.3675.1	LUXX01011673.1	-	3701	16	incomplete-splice_match	ENSSSCG00025000720	ENSSSCT00025000916	6002	18	25	2561	25	-2561	3prime_fragment	FALSE	canonical	NA	NA	NA	NA	NA	NA	NA	TRUE	NA	NA	NA	B	coding	782	2349	230	2578	2156092	2134599	FALSE	40	GAAAATCATGTCACCCTAAT	NA	NA	NA	NA	AGTAAA	-34_x000D_
PB.3675.2	LUXX01011673.1	-	3606	16	incomplete-splice_match	ENSSSCG00025000720	ENSSSCT00025000916	6002	18	11	2670	11	-2670	3prime_fragment	FALSE	canonical	NA	NA	NA	NA	NA	NA	NA	TRUE	NA	NA	NA	B	coding	782	2349	244	2592	2156092	2134599	FALSE	15	CATTCTTTCTATGTTCATGT	NA	NA	NA	NA	NA	NA_x000D_
PB.3675.3	LUXX01011673.1	-	3038	17	novel_not_in_catalog	ENSSSCG00025000720	novel	6002	18	NA	NA	11	-3356	at_least_one_novel_splicesite	FALSE	canonical	NA	NA	NA	NA	NA	NA	NA	TRUE	NA	NA	NA	B	coding	782	2349	362	2710	2156092	2134599	FALSE	35	AGTTCATGGCCTTCAAGAAA	NA	NA	NA	NA	AATAAA	-21_x000D_
PB.3675.4	LUXX01011673.1	-	2906	16	incomplete-splice_match	ENSSSCG00025000720	ENSSSCT00025000916	6002	18	25	3356	25	-3356	3prime_fragment	FALSE	canonical	NA	NA	NA	NA	NA	NA	NA	TRUE	NA	NA	NA	B	coding	782	2349	230	2578	2156092	2134599	FALSE	35	AGTTCATGGCCTTCAAGAAA	NA	NA	NA	NA	AATAAA	-21_x000D_
PB.3675.5	LUXX01011673.1	-	2630	16	incomplete-splice_match	ENSSSCG00025000720	ENSSSCT00025000916	6002	18	10	3647	10	-3647	3prime_fragment	FALSE	canonical	NA	NA	NA	NA	NA	NA	NA	TRUE	NA	NA	NA	B	coding	782	2349	245	2593	2156092	2134599	FALSE	65	AAGAAAAAAGGATCTAAGAA	NA	NA	NA	NA	NA	NA_x000D_
PB.3675.6	LUXX01011673.1	-	1734	12	incomplete-splice_match	ENSSSCG00025000720	ENSSSCT00025000916	6002	18	0	8560	0	-8560	3prime_fragment	FALSE	canonical	NA	NA	NA	NA	NA	NA	NA	TRUE	NA	NA	NA	B	coding	493	1479	255	1733	2156092	2139476	FALSE	70	AAGAAGAAAAAAGCAAATTA	NA	NA	NA	NA	NA	NA_x000D_
PB.3676.1	LUXX01011673.1	+	338	3	novel_in_catalog	ENSSSCG00025000849	novel	318	4	NA	NA	-53	-7	combination_of_known_splicesites	FALSE	canonical	NA	NA	NA	NA	NA	NA	NA	TRUE	NA	NA	NA	A	non_coding	NA	NA	NA	NA	NA	NA	NA	35	TGAAGAATTTGAAGTGATTC	NA	NA	NA	NA	AATAAA	-19_x000D_
PB.3677.1	LUXX01011673.1	+	960	9	incomplete-splice_match	ENSSSCG00025001073	ENSSSCT00025001339	2416	12	-33	12995	-33	-12462	3prime_fragment	FALSE	canonical	NA	NA	NA	NA	NA	NA	NA	TRUE	NA	NA	NA	B	coding	291	876	46	921	2178854	2199291	FALSE	10	ACTTGGGCTATTTTGTCTGT	NA	NA	NA	NA	ATTAAA	-19_x000D_
PB.3677.2	LUXX01011673.1	+	3005	5	incomplete-splice_match	ENSSSCG00025001073	ENSSSCT00025001339	2416	12	-27	20969	-27	-20436	3prime_fragment	FALSE	canonical	NA	NA	NA	NA	NA	NA	NA	TRUE	NA	NA	NA	B	coding	157	474	40	513	2178854	2188864	FALSE	70	AAAAAACGGAAAAAAAGAGG	NA	NA	NA	NA	NA	NA_x000D_
PB.3677.3	LUXX01011673.1	+	3005	11	incomplete-splice_match	ENSSSCG00025001073	ENSSSCT00025001302	5448	13	0	2819	0	639	3prime_fragment	FALSE	canonical	NA	NA	NA	NA	NA	NA	NA	TRUE	NA	NA	NA	B	coding	353	1062	13	1074	2178854	2211033	FALSE	70	AAAATAAAAAAATGAATATG	NA	NA	NA	NA	NA	NA_x000D_
PB.3677.4	LUXX01011673.1	+	1836	11	incomplete-splice_match	ENSSSCG00025001073	ENSSSCT00025001302	5448	13	0	3988	0	3	3prime_fragment	FALSE	canonical	NA	NA	NA	NA	NA	NA	NA	TRUE	NA	NA	NA	B	coding	353	1062	13	1074	2178854	2211033	FALSE	25	CAACATCCTTTCCCAGATGC	NA	NA	NA	NA	AATAAA	-24_x000D_
PB.3678.1	LUXX01011673.1	+	1328	7	incomplete-splice_match	ENSSSCG00025001322	ENSSSCT00025001814	7678	17	-13	34672	-7	-34672	3prime_fragment	FALSE	canonical	NA	NA	NA	NA	NA	NA	NA	TRUE	NA	NA	NA	B	coding	304	912	415	1326	2224868	2246697	FALSE	50	AAAAAAAATTGAAGGTCTTG	NA	NA	NA	NA	NA	NA_x000D_
PB.3678.2	LUXX01011673.1	+	1991	11	incomplete-splice_match	ENSSSCG00025001322	ENSSSCT00025001814	7678	17	0	27059	0	-27059	3prime_fragment	FALSE	canonical	NA	NA	NA	NA	NA	NA	NA	TRUE	NA	NA	NA	B	coding	530	1590	402	1991	2224868	2254312	FALSE	60	AAAGAAGATCTAAAAGATGA	NA	NA	NA	NA	AGTAAA	-4_x000D_
PB.3679.1	LUXX01011673.1	+	2523	11	incomplete-splice_match	ENSSSCG00025001654	ENSSSCT00025002173	1852	12	9951	-630	0	-4	5prime_fragment	FALSE	canonical	NA	NA	NA	NA	NA	NA	NA	TRUE	NA	NA	NA	A	coding	448	1347	394	1740	2312435	2399810	FALSE	20	AAGAGATGTTGTGTTTGGTT	NA	NA	NA	NA	ATTAAA	-7_x000D_
PB.6259.1	LUXX01011888.1	-	905	8	novel_in_catalog	ENSSSCG00025002793	novel	4934	8	NA	NA	-13	4	intron_retention	FALSE	canonical	NA	NA	NA	NA	NA	NA	NA	TRUE	NA	NA	NA	A	coding	229	690	17	706	379865	234950	FALSE	0	CCTCTGGGCTGCTGGCTGGT	NA	NA	NA	NA	AATAAA	-25_x000D_
PB.6260.1	LUXX01011888.1	+	2457	20	incomplete-splice_match	ENSSSCG00025003958	ENSSSCT00025005304	7909	56	203	61898	-69	-61898	3prime_fragment	FALSE	canonical	NA	NA	NA	NA	NA	NA	NA	TRUE	NA	NA	NA	B	coding	733	2199	258	2456	724691	766633	FALSE	70	AAAAAGAGGTAAAAATAAAG	NA	NA	NA	NA	NA	NA_x000D_
PB.6260.2	LUXX01011888.1	+	5595	39	incomplete-splice_match	ENSSSCG00025003958	ENSSSCT00025005380	7621	55	63972	-10	63972	2	5prime_fragment	TRUE	canonical	NA	NA	NA	NA	NA	NA	NA	TRUE	NA	NA	NA	B	coding	1566	4701	142	4842	764803	833700	FALSE	30	AGATATATTTGTTCTAATTT	NA	NA	NA	NA	AATAAA	-24_x000D_
PB.6261.1	LUXX01011888.1	-	3012	20	incomplete-splice_match	ENSSSCG00025004210	ENSSSCT00025005602	6039	21	-225	3347	32	16	3prime_fragment	FALSE	canonical	NA	NA	NA	NA	NA	NA	NA	TRUE	NA	NA	NA	A	coding	781	2346	322	2667	958471	859888	FALSE	45	TAAAAAATTGAATGGACTCT	NA	NA	NA	NA	AATAAA	-30_x000D_
PB.6262.1	LUXX01011888.1	+	1458	12	incomplete-splice_match	ENSSSCG00025004360	ENSSSCT00025005846	3659	14	9026	1627	9026	-1627	internal_fragment	FALSE	canonical	NA	NA	NA	NA	NA	NA	NA	TRUE	NA	NA	NA	A	coding	404	1215	195	1409	959262	982136	FALSE	75	TCAACAAAAACAAAAACAAA	NA	NA	NA	NA	NA	NA_x000D_
PB.7257.1	LUXX01012013.1	-	2992	9	novel_not_in_catalog	ENSSSCG00025004572	novel	3018	9	NA	NA	10	14	at_least_one_novel_splicesite	FALSE	canonical	NA	NA	NA	NA	NA	NA	NA	TRUE	NA	NA	NA	B	coding	295	888	81	968	71405	48635	FALSE	30	AGTTTGTTGAAATCCTGAAG	NA	NA	NA	NA	AATAAA	-19_x000D_
PB.7257.2	LUXX01012013.1	-	2572	10	novel_not_in_catalog	ENSSSCG00025004572	novel	3018	9	NA	NA	10	14	at_least_one_novel_splicesite	TRUE	non_canonical	NA	NA	NA	NA	NA	NA	NA	TRUE	NA	NA	NA	B	coding	295	888	81	968	71405	48635	TRUE	30	AGTTTGTTGAAATCCTGAAG	NA	NA	NA	NA	AATAAA	-19_x000D_
PB.7257.3	LUXX01012013.1	-	2703	9	novel_not_in_catalog	ENSSSCG00025004572	novel	3018	9	NA	NA	10	46	at_least_one_novel_splicesite	FALSE	canonical	NA	NA	NA	NA	NA	NA	NA	TRUE	NA	NA	NA	B	coding	295	888	81	968	71405	48635	FALSE	25	AGATTTTTGAAGTATGTTTC	NA	NA	NA	NA	AATAAA	-33_x000D_
PB.7258.1	LUXX01012013.1	-	1994	10	novel_not_in_catalog	ENSSSCG00025004629	novel	2250	11	NA	NA	-236	-2	intron_retention	FALSE	canonical	NA	NA	NA	NA	NA	NA	NA	TRUE	NA	NA	NA	B	coding	244	735	126	860	99272	96939	TRUE	10	AATTGTCTCCTGTTCTTCCT	NA	NA	NA	NA	GATAAA	-15_x000D_
PB.7258.2	LUXX01012013.1	-	1930	11	novel_not_in_catalog	ENSSSCG00025004629	novel	2250	11	NA	NA	-11	-2	at_least_one_novel_splicesite	TRUE	canonical	NA	NA	NA	NA	NA	NA	NA	TRUE	NA	NA	NA	B	coding	310	933	311	1243	99272	96300	FALSE	10	AATTGTCTCCTGTTCTTCCT	NA	NA	NA	NA	GATAAA	-15_x000D_
PB.7258.3	LUXX01012013.1	-	1748	11	novel_not_in_catalog	ENSSSCG00025004629	novel	2250	11	NA	NA	-239	-2	at_least_one_novel_splicesite	FALSE	canonical	NA	NA	NA	NA	NA	NA	NA	TRUE	NA	NA	NA	B	coding	310	933	129	1061	99272	96300	FALSE	10	AATTGTCTCCTGTTCTTCCT	NA	NA	NA	NA	GATAAA	-15_x000D_
PB.7258.4	LUXX01012013.1	-	1716	11	novel_not_in_catalog	ENSSSCG00025004629	novel	2250	11	NA	NA	-239	-3	at_least_one_novel_splicesite	FALSE	canonical	NA	NA	NA	NA	NA	NA	NA	TRUE	NA	NA	NA	B	coding	251	756	275	1030	98274	96300	FALSE	10	CAATTGTCTCCTGTTCTTCC	NA	NA	NA	NA	GATAAA	-14_x000D_
PB.7259.1	LUXX01012013.1	-	609	4	incomplete-splice_match	ENSSSCG00025004702	ENSSSCT00025006350	3156	5	3178	4	3178	-4	5prime_fragment	FALSE	canonical	NA	NA	NA	NA	NA	NA	NA	TRUE	NA	NA	NA	A	coding	154	465	28	492	169929	155447	FALSE	25	AGAATGCTTACCTCTCACCT	NA	NA	NA	NA	ATTAAA	-11_x000D_
PB.7260.1	LUXX01012013.1	+	1302	7	novel_in_catalog	ENSSSCG00025004718	novel	828	7	NA	NA	-6	-7	combination_of_known_junctions	FALSE	canonical	NA	NA	NA	NA	NA	NA	NA	TRUE	NA	NA	NA	A	coding	328	987	65	1051	170088	172893	FALSE	70	AAAAAAATATAATAATCACA	NA	NA	NA	NA	NA	NA_x000D_
PB.7261.1	LUXX01012013.1	-	2290	5	novel_in_catalog	ENSSSCG00025004727	novel	2408	6	NA	NA	39	-24	combination_of_known_splicesites	FALSE	canonical	NA	NA	NA	NA	NA	NA	NA	TRUE	NA	NA	NA	B	coding	318	957	130	1086	176364	174278	FALSE	35	TACCTTTCTGAAACTGAAAT	NA	NA	NA	NA	AATAAA	-20_x000D_
PB.7261.2	LUXX01012013.1	-	1637	5	novel_in_catalog	ENSSSCG00025004727	novel	2408	6	NA	NA	5	500	combination_of_known_splicesites	FALSE	canonical	NA	NA	NA	NA	NA	NA	NA	TRUE	NA	NA	NA	B	coding	318	957	181	1137	176364	174278	FALSE	40	AAAAAACAAGCTGTGGCCCT	NA	NA	NA	NA	NA	NA_x000D_
PB.7261.3	LUXX01012013.1	-	1568	5	novel_not_in_catalog	ENSSSCG00025004727	novel	2408	6	NA	NA	217	500	at_least_one_novel_splicesite	FALSE	canonical	NA	NA	NA	NA	NA	NA	NA	TRUE	NA	NA	NA	B	coding	318	957	112	1068	176364	174278	FALSE	40	AAAAAACAAGCTGTGGCCCT	NA	NA	NA	NA	NA	NA_x000D_
PB.7261.4	LUXX01012013.1	-	2129	1	intergenic	novelGene_556	novel	NA	NA	NA	NA	NA	NA	mono-exon	FALSE	NA	NA	NA	NA	NA	NA	NA	NA	NA	NA	NA	NA	A	non_coding	NA	NA	NA	NA	NA	NA	NA	80	TCAAAAAGACAAAAAAAAAA	NA	NA	NA	NA	NA	NA_x000D_
PB.7262.1	LUXX01012013.1	+	980	7	novel_not_in_catalog	ENSSSCG00025004730	novel	2342	7	NA	NA	-7849	-3	at_least_one_novel_splicesite	FALSE	canonical	NA	NA	NA	NA	NA	NA	NA	TRUE	NA	NA	NA	A	coding	167	504	123	626	195398	200196	FALSE	15	AGTGGCTTGTGGTTCTCTAA	NA	NA	NA	NA	AATAAA	-14_x000D_
PB.7263.1	LUXX01012013.1	+	2173	13	full-splice_match	ENSSSCG00025004734	ENSSSCT00025006407	2237	13	53	11	53	-11	multi-exon	FALSE	canonical	NA	NA	NA	NA	NA	NA	NA	TRUE	NA	NA	NA	A	coding	565	1698	205	1902	202679	207503	FALSE	55	AAGAAAAAAAATGATGTTCT	NA	NA	NA	NA	AATAAA	-7_x000D_
PB.7264.1	LUXX01012013.1	+	2366	11	novel_in_catalog	ENSSSCG00025004754	novel	1873	15	NA	NA	-13	0	intron_retention	FALSE	canonical	NA	NA	NA	NA	NA	NA	NA	TRUE	NA	NA	NA	B	coding	206	621	1670	2290	211240	212265	FALSE	5	GCTTGGTCTGGCTGATCTGT	NA	NA	NA	NA	ATTAAA	-15_x000D_
PB.7264.2	LUXX01012013.1	+	1729	13	incomplete-splice_match	ENSSSCG00025004754	ENSSSCT00025006433	1873	15	641	-1	0	0	5prime_fragment	FALSE	canonical	NA	NA	NA	NA	NA	NA	NA	TRUE	NA	NA	NA	B	coding	477	1434	220	1653	208967	212265	FALSE	5	GCTTGGTCTGGCTGATCTGT	NA	NA	NA	NA	ATTAAA	-15_x000D_
PB.7264.3	LUXX01012013.1	+	1678	12	incomplete-splice_match	ENSSSCG00025004754	ENSSSCT00025006433	1873	15	860	-1	-168	0	5prime_fragment	FALSE	canonical	NA	NA	NA	NA	NA	NA	NA	TRUE	NA	NA	NA	B	coding	506	1521	82	1602	208880	212265	FALSE	5	GCTTGGTCTGGCTGATCTGT	NA	NA	NA	NA	ATTAAA	-15_x000D_
PB.7265.1	LUXX01012013.1	-	2020	8	novel_not_in_catalog	ENSSSCG00025004756	novel	2105	8	NA	NA	9	5	at_least_one_novel_splicesite	FALSE	canonical	NA	NA	NA	NA	NA	NA	NA	TRUE	NA	NA	NA	B	coding	396	1191	311	1501	216980	212954	FALSE	5	GCTCCTGCTTTCTGCATCCC	NA	NA	NA	NA	AATAAA	-19_x000D_
PB.7265.2	LUXX01012013.1	-	1950	8	novel_not_in_catalog	ENSSSCG00025004756	novel	2105	8	NA	NA	-3	2	at_least_one_novel_splicesite	FALSE	canonical	NA	NA	NA	NA	NA	NA	NA	TRUE	NA	NA	NA	B	coding	396	1191	244	1434	216980	212954	FALSE	5	TCTGCTCCTGCTTTCTGCAT	NA	NA	NA	NA	AATAAA	-16_x000D_
PB.7266.1	LUXX01012013.1	-	3712	9	full-splice_match	ENSSSCG00025004759	ENSSSCT00025006443	3720	9	-1	9	-1	-9	multi-exon	FALSE	canonical	NA	NA	NA	NA	NA	NA	NA	TRUE	NA	NA	NA	A	coding	872	2619	325	2943	235976	228300	FALSE	35	AACAAATGTCAGCTGCTATC	NA	NA	NA	NA	AATAAA	-37_x000D_
[truncated: 13,500 more rows]
