# Supplementary material for: Integrative analysis of transcriptome complexity in pig granulosa cells by long-read isoform sequencing
Source: PeerJ. 2022 May 25;10:e13446. doi: 10.7717/peerj.13446 (PMC9147391; doi:10.7717/peerj.13446)
Supplement: Supplemental Information 3 [file peerj-10-13446-s003.xlsx]

## Sheet: Sheet1
ID	Chr	start	end	strand	full_length_coverage	length
PB.79.6	LUXX01096521.1	6077801	6078463	+	2	663
PB.184.1	LUXX01058647.1	4398961	4404278	+	2	5329
PB.184.2	LUXX01058647.1	4400055	4404283	+	2	4229
PB.217.3	LUXX01034745.1	51256	54971	-	2	3719
PB.243.2	LUXX01034745.1	3749993	3753445	-	2	1565
PB.331.1	LUXX01015702.1	2410710	2413820	-	2	3108
PB.470.3	LUXX01100219.1	6448875	6481611	+	2	3247
PB.475.1	LUXX01081985.1	1015636	1016792	+	3	1160
PB.680.1	LUXX01048137.1	4984796	4986695	+	3	1901
PB.722.3	LUXX01068002.1	2014456	2018373	+	2	3924
PB.801.6	LUXX01089374.1	243904	246611	-	5	2705
PB.831.1	LUXX01054881.1	1172844	1175708	-	2	2864
PB.859.1	LUXX01052731.1	281394	284032	+	2	2635
PB.920.1	LUXX01084869.1	625625	629444	+	2	3820
PB.949.3	LUXX01084869.1	4221135	4225275	-	2	4142
PB.955.7	LUXX01084869.1	5467945	5470909	+	2	2963
PB.1112.2	LUXX01096074.1	2816337	2819780	+	2	3258
PB.1114.3	LUXX01096074.1	2874049	2876082	-	2	2056
PB.1200.1	LUXX01062172.1	5221825	5223597	+	2	1783
PB.1238.4	LUXX01098468.1	4782519	4785793	+	3	3274
PB.1405.13	LUXX01047591.1	1752833	1754694	-	2	1862
PB.1461.14	LUXX01091881.1	726865	728213	-	4	1351
PB.1478.7	LUXX01090487.1	1579634	1605552	-	2	6402
PB.1480.3	LUXX01090487.1	3907094	3948011	-	2	3221
PB.1688.1	LUXX01090609.1	772273	774559	+	2	2288
PB.1799.9	LUXX01024692.1	180810	184147	+	2	3340
PB.2059.1	LUXX01024807.1	2951182	2953206	-	5	2025
PB.2291.2	LUXX01077104.1	3723736	3725162	-	2	1427
PB.2380.1	LUXX01024205.1	3532166	3534531	-	2	2371
PB.2476.1	LUXX01031818.1	2976728	2979088	+	2	2362
PB.2483.1	LUXX01091778.1	1526635	1528920	+	2	2286
PB.2529.1	LUXX01058120.1	1702618	1861661	-	2	2788
PB.2645.1	LUXX01036107.1	2992050	2993373	+	2	1324
PB.2673.1	LUXX01048769.1	1653179	1655290	-	2	2113
PB.2745.5	LUXX01070791.1	1624547	1627021	+	2	2476
PB.2958.2	LUXX01019479.1	1401827	1404323	+	3	2499
PB.3103.1	LUXX01089463.1	2307785	2311124	+	2	3357
PB.3173.1	LUXX01052760.1	450549	467487	-	3	1581
PB.3187.1	LUXX01017516.1	2011162	2014654	+	2	3493
PB.3273.1	LUXX01090259.1	2005049	2008896	-	2	3850
PB.3561.3	LUXX01060653.1	538550	541607	-	2	3215
PB.3662.1	LUXX01073386.1	1629982	1630840	+	2	859
PB.3807.1	LUXX01100395.1	1057153	1059959	-	2	2807
PB.3845.2	LUXX01092430.1	2240051	2241588	+	2	1538
PB.3883.1	LUXX01010084.1	2247869	2251122	+	5	3256
PB.3883.2	LUXX01010084.1	2249880	2251122	+	2	1243
PB.4007.2	LUXX01024000.1	129893	131543	-	2	1651
PB.4075.1	LUXX01079176.1	1050719	1052156	+	3	1439
PB.4302.1	LUXX01086141.1	922996	925676	+	2	2681
PB.4422.3	LUXX01093914.1	1359240	1381352	+	2	2423
PB.4507.24	LUXX01062592.1	1688787	1692943	-	7	4158
PB.4658.1	LUXX01071604.1	689930	691965	+	2	2035
PB.4716.1	LUXX01093185.1	1180987	1183137	-	2	2154
PB.4944.1	LUXX01011190.1	603462	605677	-	2	947
PB.4978.1	LUXX01047698.1	1072992	1076767	+	3	3769
PB.5123.1	LUXX01039762.1	179514	181059	+	2	1546
PB.5173.1	LUXX01032704.1	1391491	1393723	+	2	2236
PB.5185.1	LUXX01004627.1	1156884	1159612	-	2	2729
PB.5231.1	LUXX01035035.1	788272	789279	-	2	1007
PB.5233.1	LUXX01035035.1	806931	810264	-	4	3334
PB.5244.1	LUXX01060250.1	977049	978162	+	2	1115
PB.5254.1	LUXX01059947.1	1533658	1536541	-	2	2882
PB.5280.1	LUXX01059147.1	712097	715167	+	2	3076
PB.5307.1	LUXX01052568.1	448629	452579	-	2	3952
PB.5426.1	LUXX01051497.1	939536	941077	-	2	1542
PB.5440.2	LUXX01014124.1	578333	597474	-	2	955
PB.5565.1	LUXX01013860.1	886196	890530	+	2	4307
PB.5696.5	LUXX01025949.1	430546	432248	-	3	1704
PB.5849.55	LUXX01068706.1	901431	904092	-	2	2662
PB.5849.56	LUXX01068706.1	951528	954511	-	2	2985
PB.5876.1	LUXX01007252.1	991579	994578	+	2	2999
PB.5889.1	LUXX01048344.1	184552	189140	-	2	4587
PB.5892.15	LUXX01048344.1	382520	385485	-	2	2965
PB.5921.1	LUXX01000316.1	599727	601697	-	3	1976
PB.6101.3	LUXX01012514.1	359485	360806	-	2	1324
PB.6129.1	LUXX01075627.1	735928	738898	+	2	2963
PB.6252.2	LUXX01066116.1	3541	8406	+	2	4868
PB.6263.11	LUXX01053126.1	458651	461258	+	2	2601
PB.6441.1	LUXX01082363.1	609410	610615	-	3	1210
PB.6491.2	LUXX01100606.1	365534	369364	-	2	3835
PB.6495.1	LUXX01100606.1	511037	514437	-	2	3403
PB.6497.1	LUXX01100606.1	523785	526525	+	3	2747
PB.6574.1	LUXX01012311.1	306894	308829	+	2	1937
PB.6897.1	LUXX01084990.1	196893	200893	+	2	3905
PB.7026.1	LUXX01031391.1	325706	328311	-	2	2605
PB.7027.1	LUXX01031391.1	449242	452121	+	2	2890
PB.7045.11	LUXX01073663.1	214552	217269	-	2	2717
PB.7133.1	LUXX01000318.1	220484	224027	-	2	3538
PB.7282.3	LUXX01076984.1	262146	263570	-	2	1464
PB.7313.2	LUXX01004887.1	302876	303662	+	2	788
PB.7345.2	LUXX01076892.1	252399	253794	+	2	1399
PB.7479.2	LUXX01057747.1	94005	98092	+	2	4083
