# Supplementary material for: Integrative analysis of transcriptome complexity in pig granulosa cells by long-read isoform sequencing
Source: PeerJ. 2022 May 25;10:e13446. doi: 10.7717/peerj.13446 (PMC9147391; doi:10.7717/peerj.13446)
Supplement: Supplemental Information 4 [file peerj-10-13446-s004.xlsx]

## Sheet: Sheet1
gene	strand	aligned reads	num sites	locations
ENSSSCG00025022895	-	1	1	47999
ENSSSCG00025029109	-	9	6	665542,663806,664315,664564,665603,672179
ENSSSCG00025040158	-	3	2	1091442,1107829
ENSSSCG00025051327	-	4	3	3135534,3136084,3136584
ENSSSCG00025071784	-	19	2	643745,643722
ENSSSCG00025077491	+	4	4	3309149,3319954,3402300,3447005
ENSSSCG00025030682	+	1	1	731252
ENSSSCG00025058126	+	2	1	148775
ENSSSCG00025049539	-	2	1	26152
ENSSSCG00025057246	+	3	3	542121,543907,594529
ENSSSCG00025007614	-	20	3	135811,129793,134011
ENSSSCG00025071521	+	9	6	1431015,1431040,1477565,1483958,1484207,1487257
ENSSSCG00025039490	+	132	5	793154,793296,793133,792682,795055
ENSSSCG00025029071	-	15	3	1558340,1556969,1673468
ENSSSCG00025035562	+	6	1	5815087
ENSSSCG00025042491	+	2	2	277285,277923
ENSSSCG00025025085	+	2	2	466222,466313
ENSSSCG00025061282	+	27	2	1387468,1382584
ENSSSCG00025021596	-	5	1	2617637
ENSSSCG00025071021	+	15	1	2709626
ENSSSCG00025055749	+	66	3	1404681,1403947,1406447
ENSSSCG00025018646	+	2	2	853095,855534
ENSSSCG00025035334	+	29	4	200980,200114,197656,200010
ENSSSCG00025015311	+	6	1	1907389
ENSSSCG00025051859	+	16	1	219170
ENSSSCG00025063306	+	2	2	27210,59379
ENSSSCG00025063221	-	18	1	46732
ENSSSCG00025010450	-	3	3	2861166,2861185,2879837
ENSSSCG00025023248	+	13	3	1667659,1664030,1667778
ENSSSCG00025067292	-	23	3	1691401,1690616,1654781
ENSSSCG00025041192	+	3	2	348413,348481
ENSSSCG00025076805	+	5	4	1516744,1479697,1487902,1516859
ENSSSCG00025002488	+	2	2	843091,1158605
ENSSSCG00025055221	+	3	1	1509018
ENSSSCG00025056938	+	1	1	2334652
ENSSSCG00025076693	-	2	2	979786,979944
ENSSSCG00025012181	-	16	2	380031,380127
ENSSSCG00025004204	-	10	4	186936,200010,206312,220062
ENSSSCG00025034160	-	16	2	871251,870986
ENSSSCG00025035065	-	5	5	590649,594977,595437,595852,595913
ENSSSCG00025007594	-	1	1	270057
ENSSSCG00025054144	+	2	2	749611,758695
ENSSSCG00025022723	-	1	1	1471726
ENSSSCG00025072024	+	6	2	406798,409541
ENSSSCG00025046721	+	1	1	3888425
ENSSSCG00025017318	+	1	1	294933
ENSSSCG00025025829	+	7	1	4714147
ENSSSCG00025069189	-	13	3	950523,950713,950554
ENSSSCG00025053198	+	2	1	1533255
ENSSSCG00025073181	-	1	1	114028
ENSSSCG00025070833	+	4	2	2331703,2332004
ENSSSCG00025067179	+	54	6	925366,923312,902535,905666,926078,943673
ENSSSCG00025033917	+	3	2	1813412,1810284
ENSSSCG00025076927	+	18	1	4395914
ENSSSCG00025075602	-	3	2	2698799,2702211
ENSSSCG00025063007	+	22	1	5300660
ENSSSCG00025037933	-	10	2	1326736,1326699
ENSSSCG00025035586	-	7	1	197631
ENSSSCG00025024584	+	10	1	808375
ENSSSCG00025044551	+	1	1	2464029
ENSSSCG00025011349	+	2	2	751583,756566
ENSSSCG00025025406	-	4	3	1096241,1140910,1141712
ENSSSCG00025063681	+	9	4	3547442,3546652,3548422,3548644
ENSSSCG00025061254	-	19	3	5246163,5246228,5250576
ENSSSCG00025027625	-	15	4	755850,755707,780266,756132
ENSSSCG00025054646	-	7	1	3776881
ENSSSCG00025043828	+	24	5	2857063,2857598,2856839,2857269,2857729
ENSSSCG00025037699	+	51	2	568093,571656
ENSSSCG00025071829	+	2	2	2279449,2279528
ENSSSCG00025064946	+	75	3	581536,580527,580588
ENSSSCG00025076660	-	35	3	598670,600476,735235
ENSSSCG00025016022	+	6	2	2693843,2693998
ENSSSCG00025076097	+	1	1	422018
ENSSSCG00025066398	+	11	1	2334231
ENSSSCG00025063710	+	3	1	160534
ENSSSCG00025051989	-	22	10	476124,478473,459519,470116,474554,475345,476515,476842,501101,542709
ENSSSCG00025043814	-	21	6	1449,1476,2360,2643,23967,14291
ENSSSCG00025041625	-	1	1	157081
ENSSSCG00025048628	+	1	1	314419
ENSSSCG00025024902	+	5	4	360451,273478,345142,444060
ENSSSCG00025075490	-	11	2	454495,477561
ENSSSCG00025066976	-	1	1	125683
ENSSSCG00025068810	+	2	2	210391,210455
ENSSSCG00025059893	+	5	1	316541
ENSSSCG00025034303	+	6	1	871028
ENSSSCG00025046954	+	156	7	304198,294509,304179,294452,304868,292327,302677
ENSSSCG00025075761	+	159	5	1328765,1327573,1327548,1326794,1327612
ENSSSCG00025006773	-	3	1	1117804
ENSSSCG00025030878	+	1	1	293257
ENSSSCG00025054079	-	9	5	97773,51240,75323,75547,77877
ENSSSCG00025026558	+	3	1	1359066
ENSSSCG00025021469	-	12	3	236218,239947,237721
ENSSSCG00025034470	+	17	7	979982,980045,980116,980742,980958,981818,982549
ENSSSCG00025011323	-	14	2	3389792,3395469
ENSSSCG00025043874	-	20	4	130001,130265,130054,130105
ENSSSCG00025060015	-	5	3	107193,143160,143217
ENSSSCG00025069500	-	8	1	208355
ENSSSCG00025015517	-	5	1	1629929
ENSSSCG00025010746	+	41	1	2218454
ENSSSCG00025036535	+	132	3	31951,31921,32338
ENSSSCG00025065581	+	4	3	911101,911355,911576
ENSSSCG00025026913	+	63	2	365820,365195
ENSSSCG00025047888	-	9	4	343329,343212,343508,343681
ENSSSCG00025063739	-	5	3	4195664,4193690,4195095
ENSSSCG00025016919	-	4	2	648889,648695
ENSSSCG00025043631	+	1	1	676920
ENSSSCG00025052040	-	3	1	821489
ENSSSCG00025009796	+	1	1	1705568
ENSSSCG00025015657	-	12	3	4015941,4013714,3995067
ENSSSCG00025021696	+	21	5	1853772,1819265,1852739,1852979,1853311
ENSSSCG00025011246	+	25	2	2787757,2787855
ENSSSCG00025076231	-	105	4	2758063,2758367,2772487,2758774
ENSSSCG00025009287	+	8	3	561038,562840,561702
ENSSSCG00025029523	+	35	1	82881
ENSSSCG00025004909	+	3	1	753741
ENSSSCG00025020389	-	14	5	834373,834686,835284,860653,882253
ENSSSCG00025074767	-	4	4	1860716,1866514,1892077,1892538
ENSSSCG00025076844	-	5	1	2890414
ENSSSCG00025047084	-	10	3	3173166,3251279,3171839
ENSSSCG00025027844	-	32	4	515408,515302,520751,532028
ENSSSCG00025051926	+	6	2	52174,70578
ENSSSCG00025006633	-	2	2	59359,59796
ENSSSCG00025029839	+	2	2	453804,455434
ENSSSCG00025007122	-	2	1	1330142
ENSSSCG00025048045	-	24	3	4561449,4561678,4595838
ENSSSCG00025068945	-	17	1	803760
ENSSSCG00025049859	-	5	2	1072581,1072927
ENSSSCG00025052888	-	2	1	398656
ENSSSCG00025037244	-	1	1	666466
ENSSSCG00025036656	+	6	4	2461873,2462055,2462307,2462389
ENSSSCG00025046904	-	13	2	622162,624165
ENSSSCG00025077780	-	14	1	1055627
ENSSSCG00025049049	-	35	5	1127142,1127110,1128198,1124623,1127161
ENSSSCG00025049776	-	34	5	3079283,3077066,3078215,3079586,3094089
ENSSSCG00025038510	+	6	3	71762,73488,75246
ENSSSCG00025070090	+	21	6	445157,383233,444866,443746,445487,445513
ENSSSCG00025072401	-	7	3	274020,274275,283596
ENSSSCG00025063952	-	1	1	1557521
ENSSSCG00025075181	+	12	4	3796984,3744062,3764697,3798369
ENSSSCG00025006648	+	5	1	75401
ENSSSCG00025072302	+	3	2	188636,190420
ENSSSCG00025020578	-	3	3	4197098,4220716,4220743
ENSSSCG00025017424	+	10	1	493973
ENSSSCG00025031271	+	4	2	2694876,2710991
ENSSSCG00025077259	-	9	1	3188369
ENSSSCG00025060339	-	7	3	360027,360048,361055
ENSSSCG00025063303	+	5	2	2054314,2054292
ENSSSCG00025031823	+	1	1	882435
ENSSSCG00025046767	-	35	4	2267283,2265834,2264386,2266519
ENSSSCG00025040980	+	1	1	1429628
ENSSSCG00025060672	+	7	2	494718,440682
ENSSSCG00025076640	-	27	1	1102570
ENSSSCG00025068344	+	4	2	969644,981420
ENSSSCG00025005917	+	2	1	2569710
ENSSSCG00025039473	+	4	4	2248795,2253460,2253613,2255552
ENSSSCG00025057828	+	14	2	2813516,2812780
ENSSSCG00025073716	+	782	4	3367226,3367199,3362513,3367247
ENSSSCG00025019510	-	1	1	1661713
ENSSSCG00025041866	-	30	3	1870121,1875943,1891538
ENSSSCG00025060155	-	26	7	1996828,1996609,1996697,1978964,1985286,1996879,2030527
ENSSSCG00025012446	+	5	3	35080,36155,36178
ENSSSCG00025024549	+	52	6	242832,242592,241726,241783,242080,242115
ENSSSCG00025057941	-	7	5	2357915,2351729,2357937,2358118,2360399
ENSSSCG00025076762	+	45	3	824220,823893,825335
ENSSSCG00025013728	+	1	1	282937
ENSSSCG00025003496	+	29	5	361005,360881,364016,303212,361027
ENSSSCG00025025111	-	2	1	913240
ENSSSCG00025072869	-	1	1	79056
ENSSSCG00025074098	-	1	1	486473
ENSSSCG00025026768	+	8	5	2426512,2411832,2589717,2589780,2593653
ENSSSCG00025066859	+	2	1	2688662
ENSSSCG00025040023	+	9	2	2241910,2241758
ENSSSCG00025032262	+	28	4	4097782,4088138,4089931,4098833
ENSSSCG00025065849	+	8	1	145410
ENSSSCG00025037940	+	12	1	526779
ENSSSCG00025011228	-	7	1	602617
ENSSSCG00025041408	+	3	2	218884,214351
ENSSSCG00025071042	-	2	2	336389,336475
ENSSSCG00025074151	-	1	1	138747
ENSSSCG00025023410	+	3	3	4208869,4211167,4274958
ENSSSCG00025050478	+	32	4	4678481,4679705,4680002,4679967
ENSSSCG00025044657	+	49	5	200660,182091,200445,200489,205020
ENSSSCG00025076702	-	2	1	760202
ENSSSCG00025024388	+	89	3	7518560,7517053,7506220
ENSSSCG00025053871	+	65	4	1107518,1099092,1103686,1103810
ENSSSCG00025064626	+	4	4	671082,671411,671509,672000
ENSSSCG00025071081	+	16	2	5433163,5432672
ENSSSCG00025076935	-	5	2	409282,448147
ENSSSCG00025025843	+	34	5	81981,46329,80520,81031,82122
ENSSSCG00025061866	+	81	1	2540132
ENSSSCG00025036606	+	20	2	195014,180196
ENSSSCG00025013431	-	22	3	2120189,2119317,2123151
ENSSSCG00025059794	+	7	2	1387503,1367882
ENSSSCG00025005089	-	211	2	770797,770868
ENSSSCG00025072327	-	20	4	402503,402775,403327,403574
ENSSSCG00025077101	-	3	2	817213,817278
ENSSSCG00025067060	+	17	2	41282,40450
ENSSSCG00025068534	-	22	1	793401
ENSSSCG00025076178	-	40	8	1030281,1008632,1008652,1008724,1012558,1012661,1027928,1028484
ENSSSCG00025054677	-	3	2	248914,252143
ENSSSCG00025001237	-	19	10	283037,283077,293430,401983,275757,277001,289060,292020,310317,360279
ENSSSCG00025064867	-	10	5	876228,875847,876800,877260,922418
ENSSSCG00025015521	-	1	1	1945633
ENSSSCG00025006784	+	1	1	1536499
ENSSSCG00025055046	+	4	1	4734087
ENSSSCG00025025024	-	241	8	3772422,3772365,3775062,3773298,3777690,3773117,3774703,3779906
ENSSSCG00025049988	+	5	3	656606,674062,727775
ENSSSCG00025057076	-	1	1	24264
ENSSSCG00025056525	+	68	5	1503616,1503963,1503723,1503790,1503996
ENSSSCG00025070421	+	5	2	480957,476158
ENSSSCG00025060812	+	2	1	29258
ENSSSCG00025066505	+	27	15	1344116,1257113,1279851,1285464,1285911,1303432,1312458,1312595,1327942,1343922,1344043,1344168,1344191,1344352,1345741
ENSSSCG00025044618	+	1	1	479628
ENSSSCG00025019015	+	55	10	184618,101240,114607,116940,119447,126776,131632,131672,154591,171750
ENSSSCG00025007483	+	2	1	715401
ENSSSCG00025038317	+	7	3	1348175,1350333,1353406
ENSSSCG00025038263	+	9	3	9419437,9418869,9418850
ENSSSCG00025027690	+	2	2	414139,415675
ENSSSCG00025046222	-	61	6	1298704,1298931,1298445,1298735,1307289,1323834
ENSSSCG00025052371	-	10	1	1423611
ENSSSCG00025054544	+	9	2	957628,952251
ENSSSCG00025012503	+	2	1	877773
ENSSSCG00025008232	+	1	1	90330
ENSSSCG00025050969	-	19	2	103371,104321
ENSSSCG00025023717	+	12	1	519762
ENSSSCG00025016479	+	27	5	2532794,2532758,2532112,2461911,2531712
ENSSSCG00025044861	-	33	5	60435,59207,60415,87790,102663
ENSSSCG00025000067	-	8	5	1309782,1308926,1307808,1311765,1311819
ENSSSCG00025037778	-	7	4	42282,50013,50147,57323
ENSSSCG00025028005	-	86	7	1993041,1993570,1992210,1992424,1993498,2008892,2008998
ENSSSCG00025002720	-	15	6	3213003,3211444,3212094,3212809,3213632,3214191
ENSSSCG00025025559	+	13	6	596448,598610,598942,516738,566010,589546
ENSSSCG00025074066	+	7	2	1692587,1679272
ENSSSCG00025077598	+	9	1	4789274
ENSSSCG00025059636	-	2	1	1732489
ENSSSCG00025077191	-	6	2	4303291,4305057
ENSSSCG00025009383	+	2	2	740238,740336
ENSSSCG00025041522	+	38	3	618514,613199,618452
ENSSSCG00025037615	-	1	1	480505
ENSSSCG00025066227	+	2	1	1355177
ENSSSCG00025049676	-	8	1	3146487
ENSSSCG00025056517	-	2	2	3025541,3036810
ENSSSCG00025064925	+	6	2	301012,301978
ENSSSCG00025066435	+	3	3	1320395,1320664,1322898
ENSSSCG00025076103	+	20	3	1457136,1454770,1452812
ENSSSCG00025007746	+	3	2	1751901,1754247
ENSSSCG00025005575	-	35	12	488948,488929,489010,523591,489063,490171,490195,523673,524090,524752,525060,525704
ENSSSCG00025057131	-	1	1	502039
ENSSSCG00025035560	+	9	4	1244644,930773,1233269,1243841
ENSSSCG00025005925	+	23	1	284749
ENSSSCG00025026705	-	20	3	596424,596772,596334
ENSSSCG00025015404	+	14	2	565796,555655
ENSSSCG00025074739	+	2	2	1154283,1154723
ENSSSCG00025049108	+	49	22	214937,137749,212074,212694,86940,111827,211230,212640,213456,87926,125657,138565,156788,193383,200070,211275,212026,212049,212909,213168,213494,213937
ENSSSCG00025038697	-	7	2	931374,931179
ENSSSCG00025068844	-	3	1	2682524
ENSSSCG00025067960	-	4	3	1433357,1432277,1433474
ENSSSCG00025065033	-	124	6	1421940,1422859,1421964,1422998,1423035,1423110
ENSSSCG00025002923	+	6	2	345073,345139
ENSSSCG00025030848	+	7	2	488140,488680
ENSSSCG00025036172	+	6	1	2793841
ENSSSCG00025050328	-	32	5	1953603,1953568,1958132,1953523,1965408
ENSSSCG00025029692	-	3	1	1109568
ENSSSCG00025028492	-	4	1	417737
ENSSSCG00025076162	+	2	2	868350,914142
ENSSSCG00025076539	-	4	1	1844087
ENSSSCG00025059768	+	1	1	1921261
ENSSSCG00025024643	-	22	1	202315
ENSSSCG00025027434	+	51	3	228847,229133,229390
ENSSSCG00025076414	-	2	2	1513891,1523184
ENSSSCG00025050626	+	10	1	413273
ENSSSCG00025011984	-	2	1	303717
ENSSSCG00025067570	-	12	2	247221,249211
ENSSSCG00025058746	+	16	2	1905532,1900074
ENSSSCG00025075711	-	9	2	1838719,1839419
ENSSSCG00025070714	+	2	2	233052,252667
ENSSSCG00025008362	+	23	11	509658,509482,509502,509453,509806,510193,510764,511241,511600,512216,584441
ENSSSCG00025015044	-	13	6	1305296,1388764,1306651,1354177,1359496,1360119
ENSSSCG00025005918	-	4	1	603462
ENSSSCG00025008125	-	8	1	1960811
ENSSSCG00025030806	+	2	2	262391,263200
ENSSSCG00025027338	-	362	2	1650643,1650663
ENSSSCG00025045312	+	8	2	355112,355065
ENSSSCG00025012597	-	52	5	3467429,3505154,3472633,3467649,3482527
ENSSSCG00025026270	-	6	2	997622,1011352
ENSSSCG00025075656	+	6	1	1838690
ENSSSCG00025029925	-	22	1	1163534
ENSSSCG00025015041	+	2	2	229637,230150
ENSSSCG00025061956	-	8	3	487584,487243,487843
ENSSSCG00025037606	+	12	3	917744,917691,917720
ENSSSCG00025033740	-	5	3	328397,328378,330036
ENSSSCG00025010705	-	10	3	61407,55106,61345
ENSSSCG00025029556	-	2	1	745700
ENSSSCG00025008846	+	10	1	155857
ENSSSCG00025041836	-	14	7	452348,472031,556994,452187,486724,490692,546792
ENSSSCG00025076282	-	1	1	3988251
ENSSSCG00025030890	+	22	5	869969,871974,870000,870061,871539
ENSSSCG00025039025	-	2	1	439284
ENSSSCG00025044005	+	21	1	1502032
ENSSSCG00025021817	+	11	3	267460,267107,267441
ENSSSCG00025077520	-	6	3	431166,458430,473310
ENSSSCG00025038831	+	4	2	3714257,3660203
ENSSSCG00025037625	-	6	3	593744,593443,620023
ENSSSCG00025076509	+	6	3	1121722,1119687,1120845
ENSSSCG00025031596	-	42	9	6618574,6618866,6618285,6619763,6640115,6675259,6677462,6697041,6705248
ENSSSCG00025054412	-	1	1	4934972
ENSSSCG00025035975	-	3	1	84527
ENSSSCG00025005837	+	8	1	2429189
ENSSSCG00025019464	-	8	3	20538,20702,20660
ENSSSCG00025072618	+	1	1	1007487
ENSSSCG00025075702	+	2	2	661418,664918
ENSSSCG00025006461	+	4	1	197480
ENSSSCG00025028772	+	5	3	273395,274662,277198
ENSSSCG00025070607	-	12	3	4269273,4269365,4302418
ENSSSCG00025043308	+	10	8	1875844,1988209,1886209,1963167,1970760,1971785,1976876,1984507
ENSSSCG00025004755	-	90	3	418552,417851,460037
ENSSSCG00025039440	+	23	1	3473074
ENSSSCG00025065603	-	10	1	5376213
ENSSSCG00025039335	+	2	1	1716355
ENSSSCG00025043948	-	3	1	349597
ENSSSCG00025022636	-	1	1	1608802
ENSSSCG00025050314	+	10	2	616548,616577
ENSSSCG00025012344	+	238	7	238490,237482,237664,237880,101875,145146,220081
ENSSSCG00025064292	+	7	2	869110,869136
ENSSSCG00025073885	+	367	16	1166728,1166546,1167064,1151954,1166747,1167813,1111426,1126396,1126656,1133318,1150121,1151920,1166647,1167086,1167914,1182030
ENSSSCG00025058271	+	10	1	3418085
ENSSSCG00025009822	+	5	1	2113422
ENSSSCG00025077495	-	6	2	4054185,4054092
ENSSSCG00025043619	+	1	1	477321
ENSSSCG00025002983	+	4	1	548082
ENSSSCG00025009752	-	53	2	1732633,1734617
ENSSSCG00025058290	-	2	2	3681879,3706692
ENSSSCG00025048034	+	1	1	683814
ENSSSCG00025010339	-	35	2	2206650,2208745
ENSSSCG00025007948	+	5	2	2287358,2287434
ENSSSCG00025043570	-	2	2	328995,348407
ENSSSCG00025016080	+	14	2	2125587,2095461
ENSSSCG00025018542	-	1	1	1060829
ENSSSCG00025042826	+	27	2	39375,39199
ENSSSCG00025047467	+	9	5	3559174,3553413,3557271,3558306,3558876
ENSSSCG00025072919	-	2	1	188751
ENSSSCG00025065119	-	4	3	1402060,1402473,1405751
ENSSSCG00025013838	+	1	1	2996792
ENSSSCG00025061033	-	12	2	1327662,1326711
ENSSSCG00025041366	-	15	8	1108628,1131299,1106182,1106208,1108572,1108688,1134032,1134262
ENSSSCG00025018698	+	21	1	1578603
ENSSSCG00025006182	-	39	2	127604,126630
ENSSSCG00025007905	-	103	3	1568015,1569947,1570774
ENSSSCG00025021614	-	13	4	500870,500968,664224,686399
ENSSSCG00025050356	+	4	3	3137617,3138207,3139712
ENSSSCG00025050386	+	2	1	4556332
ENSSSCG00025060922	-	13	2	241921,242326
ENSSSCG00025048486	+	27	3	2606010,2570036,2594020
ENSSSCG00025050456	-	19	4	2109125,2108543,2107366,2115274
ENSSSCG00025023713	-	4	2	818301,817276
ENSSSCG00025072500	+	8	2	924904,924742
ENSSSCG00025076625	+	38	4	745958,745927,750572,751558
ENSSSCG00025066903	+	14	1	602525
ENSSSCG00025063518	-	10	1	1391152
ENSSSCG00025060693	+	11	3	280442,280515,269612
ENSSSCG00025014531	-	7	5	682553,681005,682144,683710,723430
ENSSSCG00025031072	-	5	5	493232,493368,494553,550430,568487
ENSSSCG00025004506	+	6	1	2673181
ENSSSCG00025058377	-	1	1	28301
ENSSSCG00025017452	+	3	1	923568
ENSSSCG00025043060	-	293	14	262543,262844,263028,263731,275193,259478,259585,259638,262820,263048,263069,266408,270784,277828
ENSSSCG00025076671	+	3	1	360062
ENSSSCG00025036476	+	9	7	1349226,1333896,1337709,1342718,1349278,1349780,1350363
ENSSSCG00025013356	+	13	6	174990,202574,168828,169437,171597,202235
ENSSSCG00025047037	-	5	2	435620,447729
ENSSSCG00025035966	-	30	6	13393,14006,12829,13044,13432,15154
ENSSSCG00025019885	-	1	1	536975
ENSSSCG00025076246	-	33	1	914448
ENSSSCG00025045377	-	315	2	776070,779114
ENSSSCG00025026917	+	2	1	1402084
ENSSSCG00025043962	-	5	1	314584
ENSSSCG00025050804	+	10	3	711745,711687,712589
ENSSSCG00025022578	+	23	4	776525,775812,775610,775877
ENSSSCG00025004380	-	7	3	320535,329169,331789
ENSSSCG00025065751	-	31	5	919749,919423,919850,919888,920073
ENSSSCG00025033154	+	1	1	4147577
ENSSSCG00025054837	+	11	2	328393,328417
ENSSSCG00025025331	+	38	4	4354086,4354113,4339443,4352891
ENSSSCG00025006883	-	1	1	219133
ENSSSCG00025055045	-	1	1	2152258
ENSSSCG00025064800	+	7	3	620685,618688,618652
ENSSSCG00025043851	-	4	1	616980
ENSSSCG00025063125	-	17	2	535016,534014
ENSSSCG00025042760	-	13	2	1280214,1278626
ENSSSCG00025048460	+	2	1	386063
ENSSSCG00025076000	-	18	5	981835,982261,981111,981570,996645
ENSSSCG00025019920	-	4	2	567705,558203
ENSSSCG00025058724	-	3	2	265893,262161
ENSSSCG00025016134	+	4	1	1554647
ENSSSCG00025028193	+	14	6	3621072,3624361,3598810,3607394,3613326,3624339
ENSSSCG00025029902	+	165	3	2811847,2811822,2809226
ENSSSCG00025002144	-	30	2	2143406,2149013
ENSSSCG00025054716	+	6	3	746868,745863,746119
ENSSSCG00025009926	+	4	3	297873,323859,323879
ENSSSCG00025076131	-	1	1	136617
ENSSSCG00025068366	+	2	1	504814
ENSSSCG00025077031	-	6	1	1945176
ENSSSCG00025012076	-	15	3	2230964,2230821,2234395
ENSSSCG00025019858	-	39	10	81675,80054,81461,81204,81262,81616,116826,130391,138697,140777
ENSSSCG00025050604	+	1	1	278837
ENSSSCG00025049494	+	16	7	643077,634972,643057,634948,635007,642792,642993
ENSSSCG00025068752	-	8	3	1037706,1035870,1035898
ENSSSCG00025053567	+	2	1	1817938
ENSSSCG00025031915	+	2	2	496325,533001
ENSSSCG00025066593	-	6	3	1499286,1466920,1483934
ENSSSCG00025035252	-	1	1	1010938
ENSSSCG00025053307	-	2	2	3236027,3237266
ENSSSCG00025049371	+	9	5	2394579,2347612,2383709,2394625,2395919
ENSSSCG00025030523	-	1	1	952233
ENSSSCG00025068460	-	1	1	4645846
ENSSSCG00025076133	-	1	1	2908673
ENSSSCG00025001507	-	2	1	41555
ENSSSCG00025034371	+	5	1	663372
ENSSSCG00025075858	-	1	1	1738843
ENSSSCG00025015354	-	4	1	822711
ENSSSCG00025012559	+	130	4	919999,919904,919972,913821
ENSSSCG00025040767	+	22	3	1317623,1317559,1255680
ENSSSCG00025075432	-	4	1	271468
ENSSSCG00025048952	-	9	3	624054,623965,622113
ENSSSCG00025004288	+	10	3	38733,37435,38546
ENSSSCG00025061227	-	1	1	3976586
ENSSSCG00025077552	+	2	2	2771909,2773932
ENSSSCG00025020977	+	1	1	2090785
ENSSSCG00025075603	-	1	1	4615369
ENSSSCG00025070525	-	6	3	5527924,5525398,5525419
ENSSSCG00025053783	-	1	1	3274895
ENSSSCG00025046003	+	3	2	3168386,3179345
ENSSSCG00025075829	-	36	5	536755,537681,544856,545674,546570
ENSSSCG00025063566	-	4	1	373997
ENSSSCG00025010395	-	24	4	612098,613043,611637,612066
ENSSSCG00025052542	+	14	3	655416,655523,654541
ENSSSCG00025077617	+	2	1	3686534
ENSSSCG00025030055	+	1	1	311180
ENSSSCG00025043790	+	17	2	68519,68215
ENSSSCG00025015712	+	4	2	658825,659319
ENSSSCG00025045583	+	3	2	286394,329437
ENSSSCG00025074801	-	1	1	221413
ENSSSCG00025018920	+	4	3	640938,640326,640844
ENSSSCG00025075942	+	73	5	915875,907490,901885,907976,915249
ENSSSCG00025066514	-	16	1	270764
ENSSSCG00025000604	-	17	1	2145712
ENSSSCG00025060428	+	1	1	866784
ENSSSCG00025074118	+	61	6	473838,454020,472554,472977,473298,473676
ENSSSCG00025000596	+	9	2	40172,57903
ENSSSCG00025031010	+	104	3	110791,111001,111070
ENSSSCG00025020553	+	3	3	2809859,2852927,2859612
ENSSSCG00025025079	-	1	1	2873886
ENSSSCG00025077504	+	31	4	970615,969712,892898,949567
ENSSSCG00025006895	-	2	2	120351,186302
ENSSSCG00025029003	+	1	1	145051
ENSSSCG00025074413	-	23	4	504702,517937,504683,550906
ENSSSCG00025074844	+	5	1	1081262
ENSSSCG00025011176	+	92	13	284267,300957,285086,284759,284075,300862,285794,246239,257021,284312,284690,284739,298162
ENSSSCG00025061393	+	16	7	1928839,1954693,1966006,1967798,1967950,1927112,1970147
ENSSSCG00025075522	-	23	3	1092551,1092604,1093337
ENSSSCG00025072558	-	2	2	3653249,3734472
ENSSSCG00025047494	-	22	3	2632505,2632554,2635359
ENSSSCG00025026871	+	1	1	67425
ENSSSCG00025016607	+	2	2	1302287,1302866
ENSSSCG00025027238	+	13	10	1909134,1862764,1864891,1871651,1871791,1891863,1899155,1899604,1907234,1908714
ENSSSCG00025018501	-	19	2	4174428,4172796
ENSSSCG00025001578	+	3	2	1548655,1567550
ENSSSCG00025059064	+	16	1	4870789
ENSSSCG00025067912	-	79	5	817378,817916,818533,818553,817940
ENSSSCG00025015812	-	190	11	2625704,2624977,2625672,2624602,2625093,2625011,2631835,2625372,2625733,2642038,2648705
ENSSSCG00025033090	+	1319	2	1067402,1066941
ENSSSCG00025051264	+	12	7	1513701,1504743,1515676,1515744,1516559,1516601,1518343
ENSSSCG00025048764	+	115	5	348761,346532,347834,341987,348408
ENSSSCG00025032311	+	1	1	1699547
ENSSSCG00025055033	-	15	1	815093
ENSSSCG00025071115	+	56	5	395906,384801,378226,385205,388691
ENSSSCG00025004030	+	1	1	684069
ENSSSCG00025072065	+	220	4	2372339,2372460,2372708,2372314
ENSSSCG00025058549	+	67	1	3340913
ENSSSCG00025020281	+	1	1	591541
ENSSSCG00025053352	+	1	1	2447670
ENSSSCG00025028939	+	1	1	437320
ENSSSCG00025062374	-	23	9	16535,15692,12671,14934,15438,16695,16714,17522,17824
ENSSSCG00025018990	+	18	3	260355,255706,260384
ENSSSCG00025063687	-	3	1	2209766
ENSSSCG00025066027	-	64	3	506524,506608,543096
ENSSSCG00025038599	+	9	1	624642
ENSSSCG00025043129	-	9	4	815339,814364,818567,984579
ENSSSCG00025018506	+	14	3	1545620,1537142,1539262
ENSSSCG00025060116	+	12	4	456036,456004,455224,456432
ENSSSCG00025045431	-	2	2	2363455,2364469
ENSSSCG00025010423	-	1	1	1598714
ENSSSCG00025017624	-	5	2	345161,345237
ENSSSCG00025076872	-	34	2	1199879,1199901
ENSSSCG00025074971	-	20	2	30391,31798
ENSSSCG00025001322	+	11	5	2246699,2254312,2246677,2256357,2257097
ENSSSCG00025013990	-	2	1	351456
ENSSSCG00025049599	-	20	6	767298,761454,761784,760572,761851,779071
ENSSSCG00025020215	-	4	1	697511
ENSSSCG00025064220	-	2	1	4268167
ENSSSCG00025074891	+	24	8	733855,725643,592984,601243,694750,712972,726316,731261
ENSSSCG00025065513	+	5	2	1031646,1026259
ENSSSCG00025002054	-	5	2	366385,367152
ENSSSCG00025006543	+	34	2	1030213,1032152
ENSSSCG00025037610	+	2	2	913061,1056432
ENSSSCG00025074082	+	1	1	94743
ENSSSCG00025061267	+	20	7	1812324,1772754,1811691,1812258,1812290,1812343,1812380
ENSSSCG00025004377	-	1	1	47013
ENSSSCG00025018734	+	9	1	1198159
ENSSSCG00025023052	-	21	5	441283,441557,441992,482516,488060
ENSSSCG00025025940	+	1	1	1841553
ENSSSCG00025044221	-	13	3	643169,643653,643584
ENSSSCG00025074091	+	1	1	2095273
ENSSSCG00025074920	+	17	5	918121,884705,909854,922128,922300
ENSSSCG00025060662	-	9	3	539341,542371,539555
ENSSSCG00025004682	-	2	1	35230
ENSSSCG00025041341	+	44	20	620364,659050,659659,588864,620395,658503,659415,595398,621742,650801,653108,657855,658470,658623,658751,658776,659485,659681,659713,660007
ENSSSCG00025007529	-	14	2	569295,569925
ENSSSCG00025062546	+	4	3	2089969,2124794,2125156
ENSSSCG00025049051	+	3	1	1511466
ENSSSCG00025011462	-	1	1	168440
ENSSSCG00025009091	-	1	1	42904
ENSSSCG00025016703	-	5	1	2975191
ENSSSCG00025022301	-	64	3	2712811,2713310,2712838
ENSSSCG00025003622	+	4	1	2633791
ENSSSCG00025017489	+	27	3	927679,927509,927704
ENSSSCG00025062690	+	9	4	1311977,1266973,1288477,1311825
ENSSSCG00025061054	-	4	1	1318530
ENSSSCG00025019493	-	17	3	2542410,2542330,2542795
ENSSSCG00025059130	+	18	2	181718,153540
ENSSSCG00025042803	-	8	2	1725742,1725285
ENSSSCG00025010028	-	8	2	2446795,2447914
ENSSSCG00025054104	-	5	1	3335239
ENSSSCG00025055858	-	52	2	3426346,3426424
ENSSSCG00025049825	+	7	2	86072,81343
ENSSSCG00025057663	+	3	1	2380754
ENSSSCG00025061361	+	4	1	127392
ENSSSCG00025026921	+	185	5	1889371,1888810,1889086,1889299,1890547
ENSSSCG00025029072	-	9	1	1082937
ENSSSCG00025007972	-	1	1	389778
ENSSSCG00025075283	-	1	1	258858
ENSSSCG00025065996	+	4	1	2129367
ENSSSCG00025075535	+	73	1	3726738
ENSSSCG00025014721	+	4	2	3633782,3584054
ENSSSCG00025047009	-	4	3	1693479,1702990,1706413
ENSSSCG00025053452	+	10	2	542379,484912
ENSSSCG00025046780	+	38	3	2028718,2028439,2028783
ENSSSCG00025023224	-	1	1	3460113
ENSSSCG00025020641	-	10	3	741805,742004,747010
ENSSSCG00025043157	-	7	1	2513927
ENSSSCG00025068566	-	1	1	1640969
ENSSSCG00025075669	-	1	1	1607525
ENSSSCG00025042613	-	16	1	2135569
ENSSSCG00025072299	-	10	2	1106397,1115817
ENSSSCG00025077627	-	162	3	1808211,1806168,1808085
ENSSSCG00025006449	+	1	1	2210467
ENSSSCG00025026009	+	1	1	586225
ENSSSCG00025033033	-	62	4	644768,644739,646378,646424
ENSSSCG00025037909	+	1	1	113921
ENSSSCG00025067904	+	48	8	504091,361422,364079,428670,430708,442456,456687,504745
ENSSSCG00025060760	-	61	9	2821868,2824325,2832950,2804448,2823986,2821103,2821509,2821626,2823817
ENSSSCG00025029278	-	4	1	389430
ENSSSCG00025028200	-	3	3	1806701,1811029,1827057
ENSSSCG00025067959	+	4	3	1259350,1261552,1261649
ENSSSCG00025070980	+	5	3	604383,604127,605230
ENSSSCG00025077047	+	3	1	3158553
ENSSSCG00025073255	+	1	1	617547
ENSSSCG00025042527	-	1	1	1474045
ENSSSCG00025017024	-	9	2	1683639,1685577
ENSSSCG00025028537	-	4	1	263042
ENSSSCG00025049736	+	16	6	719745,719649,721498,721666,619765,714147
ENSSSCG00025035374	-	6	1	212190
ENSSSCG00025053205	+	4	1	1055491
ENSSSCG00025072710	-	22	2	2507760,2508099
ENSSSCG00025075234	-	35	2	291180,291204
ENSSSCG00025039675	+	23	3	2922477,2924592,2922089
ENSSSCG00025016145	-	27	7	3383174,3383208,3384014,3384542,3459261,3385331,3390651
ENSSSCG00025028037	-	2	2	725819,725849
ENSSSCG00025042025	-	12	3	307319,310005,307406
ENSSSCG00025033587	+	6	1	215054
ENSSSCG00025028314	-	35	5	974562,987652,974707,974683,996082
ENSSSCG00025056506	-	1	1	99831
ENSSSCG00025037309	-	4	3	1588001,1600788,1601170
ENSSSCG00025047622	-	1	1	194440
ENSSSCG00025047336	+	9	2	1747234,1746325
ENSSSCG00025036227	-	1	1	415102
ENSSSCG00025072656	+	32	1	929984
ENSSSCG00025062802	-	5	4	590237,589871,590268,590365
ENSSSCG00025074967	-	2	2	1241002,1259653
ENSSSCG00025054274	-	18	3	1228817,1228679,1276240
ENSSSCG00025052146	+	2	2	5638481,5682218
ENSSSCG00025014759	+	11	2	5693232,5694666
ENSSSCG00025003987	-	12	7	480364,495941,511324,580010,584180,488689,580657
ENSSSCG00025022173	-	24	1	7115368
ENSSSCG00025072921	-	2	2	484676,484724
ENSSSCG00025046140	+	99	2	76519,77910
ENSSSCG00025057962	-	1	1	1483178
ENSSSCG00025029494	+	11	4	837548,840286,655156,834532
ENSSSCG00025021112	+	1	1	2169791
ENSSSCG00025030898	+	3	1	745507
ENSSSCG00025048432	+	29	4	1450972,1450350,1450995,1450903
ENSSSCG00025055986	+	3	1	844189
ENSSSCG00025076328	+	16	3	5290039,5259946,5279914
ENSSSCG00025071131	+	17	1	1852459
ENSSSCG00025069812	-	7	3	688133,686991,766966
ENSSSCG00025026436	+	1	1	1253718
ENSSSCG00025048550	+	6	1	4909937
ENSSSCG00025072093	-	1	1	2518409
ENSSSCG00025052167	+	1	1	478415
ENSSSCG00025041311	+	9	3	1573363,1575351,1543942
ENSSSCG00025048482	-	9	7	461806,461369,461863,461967,461990,463201,463378
ENSSSCG00025064436	+	1	1	254615
ENSSSCG00025077146	-	36	2	4256306,4256124
ENSSSCG00025071074	+	1	1	68397
ENSSSCG00025054091	+	1	1	294455
ENSSSCG00025015009	-	2	2	935696,936799
ENSSSCG00025035703	-	5	3	387918,389133,389183
ENSSSCG00025063999	-	30	1	441028
ENSSSCG00025000433	-	1	1	1026670
ENSSSCG00025070021	-	9	2	3041909,3053539
ENSSSCG00025042658	+	5	3	1757462,1756231,1757550
ENSSSCG00025051006	-	6	1	1109426
ENSSSCG00025068225	+	15	5	948992,950797,950680,951172,951326
ENSSSCG00025054833	+	1	1	4019817
ENSSSCG00025045432	+	101	1	521423
ENSSSCG00025026979	-	295	4	586592,586516,587879,588220
ENSSSCG00025060136	+	2	2	181754,189692
ENSSSCG00025057647	-	4	2	9364012,9373002
ENSSSCG00025015300	+	4	2	387343,377380
ENSSSCG00025073723	-	9	3	2741933,2830154,2956591
ENSSSCG00025014411	+	2	2	972676,979547
ENSSSCG00025025076	-	26	5	98707,109241,99218,94071,96692
ENSSSCG00025039653	+	5	2	670426,671341
ENSSSCG00025028485	-	18	4	4117351,4118118,4118521,4118787
ENSSSCG00025075282	+	32	6	489390,488949,489811,488924,492395,493640
ENSSSCG00025007977	-	13	1	35287
ENSSSCG00025064846	+	4	1	593882
ENSSSCG00025050143	-	9	2	2984376,2984395
ENSSSCG00025033780	+	14	3	1797474,1801723,1801999
ENSSSCG00025022494	-	20	3	747356,747653,749049
ENSSSCG00025009245	+	4	1	2080120
ENSSSCG00025032591	+	5	2	2938565,2940483
ENSSSCG00025007227	+	5	1	2159743
ENSSSCG00025045078	-	16	3	588748,592110,590657
ENSSSCG00025074862	+	7	4	3763402,3742668,3752083,3756888
ENSSSCG00025004274	+	4	3	1583869,1583894,1584467
ENSSSCG00025063343	+	2	1	956123
ENSSSCG00025048712	-	15	1	2049272
ENSSSCG00025011557	+	1	1	506635
ENSSSCG00025055895	+	16	1	1418339
ENSSSCG00025063682	+	4	3	1565845,1572842,1575891
ENSSSCG00025026628	-	8	4	1263169,1541144,1263796,1336798
ENSSSCG00025033741	-	2	1	994010
ENSSSCG00025025610	-	19	11	129827,129860,127405,53794,53864,54988,58957,102152,134643,162964,241356
ENSSSCG00025064768	-	98	1	112652
ENSSSCG00025057483	-	21	3	715994,717707,719729
ENSSSCG00025032725	-	18	4	902671,904593,903230,903443
ENSSSCG00025007533	+	3	1	739753
ENSSSCG00025066565	+	11	2	1010398,1010547
ENSSSCG00025076453	+	9	2	698738,693046
ENSSSCG00025031029	+	22	3	268456,221962,222743
ENSSSCG00025072291	+	20	2	674026,674160
ENSSSCG00025032200	-	9	1	1068955
ENSSSCG00025065174	+	12	1	1442940
ENSSSCG00025014264	-	186	9	549531,550651,550749,548423,550387,551005,559005,566982,601706
ENSSSCG00025025450	-	15	6	835361,835724,836780,839934,847738,870250
ENSSSCG00025033575	-	6	1	498173
ENSSSCG00025035314	+	57	6	2610389,2611065,2610893,2611370,2602624,2610780
ENSSSCG00025077754	+	1	1	772669
ENSSSCG00025031525	-	2	1	1964614
ENSSSCG00025028101	+	1	1	181978
ENSSSCG00025021366	-	5	2	133461,129352
ENSSSCG00025042385	-	75	7	3933127,3933775,3933749,3930948,3933468,3933607,3933671
ENSSSCG00025003941	-	4	1	418123
ENSSSCG00025017783	+	8	2	2009331,2007073
ENSSSCG00025027219	-	13	4	410150,409515,409721,410212
ENSSSCG00025021649	-	3	1	220769
ENSSSCG00025012509	-	1	1	49253
ENSSSCG00025017440	-	61	5	1161129,1158975,1161221,1161762,1178825
ENSSSCG00025019420	+	15	2	828404,824119
ENSSSCG00025038380	+	1	1	294470
ENSSSCG00025064931	-	4	1	8687200
ENSSSCG00025058521	+	12	1	241513
ENSSSCG00025017438	-	8	2	1844088,1844605
ENSSSCG00025047839	-	28	1	614982
ENSSSCG00025076537	-	5	1	295787
ENSSSCG00025067816	-	3	2	632773,632753
ENSSSCG00025045508	+	2	1	49850
ENSSSCG00025050751	-	11	4	148708,121339,135539,169797
ENSSSCG00025075688	+	4	1	769747
ENSSSCG00025003035	-	6	2	13956,14261
ENSSSCG00025017599	-	52	15	76571,76814,75286,177162,76126,74284,72526,74123,74722,75047,75323,77032,77202,77223,103090
ENSSSCG00025069269	+	2	2	518676,531730
ENSSSCG00025075590	+	16	3	876232,876464,877120
ENSSSCG00025008498	+	18	1	2196452
ENSSSCG00025049486	+	1	1	2119672
ENSSSCG00025057161	-	6	1	130778
ENSSSCG00025017057	-	2	2	709148,747649
ENSSSCG00025031065	+	15	2	989746,993412
ENSSSCG00025020011	-	4	1	192638
ENSSSCG00025045978	-	11	5	4245224,4244817,4247191,4255645,4273109
ENSSSCG00025003931	-	34	6	164045,164004,164099,164718,165126,182733
ENSSSCG00025058081	-	1	1	750492
ENSSSCG00025002343	-	28	7	253085,254667,4635,253394,253983,84227,194229
ENSSSCG00025063725	+	5	3	202115,173053,200497
ENSSSCG00025077625	-	5	2	557392,557897
ENSSSCG00025028352	-	1	1	1352756
ENSSSCG00025031663	+	2	2	3290080,3290101
ENSSSCG00025072332	-	2	2	746481,747953
ENSSSCG00025036064	-	16	3	686477,686739,698900
ENSSSCG00025015572	-	4	2	1519312,1520304
ENSSSCG00025046235	-	18	3	1627970,1628781,1628208
ENSSSCG00025008042	-	21	6	2343826,2344706,2350012,2343851,2346213,2346981
ENSSSCG00025051810	+	6	4	5563464,5565274,5565299,5570144
ENSSSCG00025071260	+	7	4	166156,168483,153164,168276
ENSSSCG00025026087	+	13	3	924925,925468,926413
ENSSSCG00025058508	+	4	4	328400,340813,342373,343456
ENSSSCG00025065819	-	31	2	972408,972775
ENSSSCG00025009310	+	1	1	61213
ENSSSCG00025058397	-	5	2	835084,837504
ENSSSCG00025054312	+	3	1	10637769
ENSSSCG00025021300	-	6	2	20613,21934
ENSSSCG00025063223	-	8	1	18612
ENSSSCG00025028610	+	7	3	502666,165111,426426
ENSSSCG00025052398	+	1	1	1121054
ENSSSCG00025066712	+	3	2	84501,129190
ENSSSCG00025032469	+	4	3	381470,396236,396678
ENSSSCG00025033102	+	6	4	4981057,4981081,4981100,4982875
ENSSSCG00025043531	-	172	1	338754
ENSSSCG00025038338	-	10	1	1411783
ENSSSCG00025032984	+	6	3	1724764,1725059,1726207
ENSSSCG00025011004	+	8	1	235936
ENSSSCG00025014098	+	3	3	2781802,2782179,2823140
ENSSSCG00025048823	+	2	1	483948
ENSSSCG00025001097	-	48	1	1223755
ENSSSCG00025077790	+	9	1	1256149
ENSSSCG00025018255	+	15	1	456003
ENSSSCG00025063861	+	2	2	1174931,1539490
ENSSSCG00025057125	+	38	9	802161,802254,801832,802034,773633,796856,801788,802235,803063
ENSSSCG00025077683	-	2	2	5204876,5204918
ENSSSCG00025033365	-	23	4	455564,461388,460994,461480
ENSSSCG00025027549	-	6	3	55244,54515,55331
ENSSSCG00025040785	-	57	6	14024,14050,13634,15041,11217,14858
ENSSSCG00025063899	-	53	3	1450971,1452084,1462351
ENSSSCG00025012759	-	2	1	908713
ENSSSCG00025060301	-	15	1	665089
ENSSSCG00025023674	+	2	2	875197,902675
ENSSSCG00025070014	+	3	2	328232,328142
ENSSSCG00025077373	-	36	6	3159376,3158017,3163485,3158847,3158823,3159315
ENSSSCG00025062334	-	4	1	567729
ENSSSCG00025046547	-	1	1	1284471
ENSSSCG00025001654	+	37	1	2400598
ENSSSCG00025027912	-	5	4	225103,193875,195438,196931
ENSSSCG00025048338	+	2	2	4788499,4820833
ENSSSCG00025023571	+	50	2	999419,999198
ENSSSCG00025017497	-	12	1	341036
ENSSSCG00025025874	-	7	3	2448081,2446458,2449427
ENSSSCG00025077187	+	1	1	884684
ENSSSCG00025076371	+	3	1	952641
ENSSSCG00025077798	+	8	1	5825354
ENSSSCG00025019072	-	11	2	1798883,1798226
ENSSSCG00025003221	-	3	1	1495389
ENSSSCG00025006693	+	18	5	97890,101940,83707,97645,97960
ENSSSCG00025076599	-	55	4	1991550,1991005,1991718,1988851
ENSSSCG00025019479	-	2	1	70039
ENSSSCG00025007150	+	4	1	369172
ENSSSCG00025015283	+	4	1	1367423
ENSSSCG00025051700	-	5	2	324687,324396
ENSSSCG00025045206	+	12	6	253780,253879,321896,238367,253651,397228
ENSSSCG00025048817	-	1	1	607470
ENSSSCG00025068887	-	40	2	47550,46120
ENSSSCG00025031155	-	84	3	778502,778523,778409
ENSSSCG00025037320	-	9	1	1273066
ENSSSCG00025054711	+	5	1	1830916
ENSSSCG00025050182	-	1	1	1263813
ENSSSCG00025043685	+	119	6	2549990,2550185,2527810,2538667,2541508,2550098
ENSSSCG00025037334	-	8	3	2832868,2832693,2846484
ENSSSCG00025033897	+	6	3	2519149,2516677,2516703
ENSSSCG00025068053	+	5	3	467065,465485,466337
ENSSSCG00025070887	-	2	2	1021360,1033958
ENSSSCG00025017738	-	3	1	269331
ENSSSCG00025072507	-	157	6	1244621,1243101,1242924,1244714,1244815,1247299
ENSSSCG00025003986	+	16	3	24479,25189,23937
ENSSSCG00025039164	-	45	2	3387257,3386880
ENSSSCG00025051401	+	19	7	3090801,3091668,3031251,3038650,3070801,3079480,3082704
ENSSSCG00025043486	+	3	1	538208
ENSSSCG00025054533	-	5	3	1712845,1749337,1766231
ENSSSCG00025021102	+	4	1	2585750
ENSSSCG00025004388	-	92	1	1831866
ENSSSCG00025074282	-	8	1	481769
ENSSSCG00025003536	-	7	3	216065,214079,246882
ENSSSCG00025075592	+	25	5	909510,843212,868571,886162,909341
ENSSSCG00025066322	-	39	8	2686609,2728410,2709345,2727070,2734737,2705925,2725494,2731167
ENSSSCG00025013553	+	91	6	940428,941114,941403,941336,939869,940984
ENSSSCG00025050126	+	25	4	1045618,1015327,1014327,1014696
ENSSSCG00025051293	-	2	1	2869996
ENSSSCG00025048443	-	54	4	2695726,2734897,2735992,2755960
ENSSSCG00025018209	-	1	1	1715045
ENSSSCG00025048085	+	78	7	1021447,822013,896010,927429,956172,983047,1016042
ENSSSCG00025027131	+	2	2	2271114,2273423
ENSSSCG00025031350	+	21	12	4702256,4702400,4702734,4705030,4702427,4702600,4703196,4703448,4704654,4704831,4704988,4705910
ENSSSCG00025043536	-	6	3	151498,150544,153913
ENSSSCG00025076084	+	26	3	2907666,2906515,2907717
ENSSSCG00025003083	+	3	1	265719
ENSSSCG00025042928	-	1	1	111012
ENSSSCG00025075803	+	54	2	834797,806126
ENSSSCG00025075209	+	26	2	1060428,1057412
ENSSSCG00025049366	-	14	1	663837
ENSSSCG00025054750	+	9	1	4699155
ENSSSCG00025077619	-	5	3	4871869,4879285,4879658
ENSSSCG00025012077	-	2	2	1460195,1460444
ENSSSCG00025049989	+	43	2	319681,319730
ENSSSCG00025023878	-	11	3	2119662,2119590,2119721
ENSSSCG00025057619	+	8	4	3090343,3110153,3079862,3110809
ENSSSCG00025073453	+	21	8	2049421,2007648,2007029,2027920,2047601,2049446,2049672,2051800
ENSSSCG00025045245	-	4	1	932877
ENSSSCG00025049493	+	2	2	129943,136564
ENSSSCG00025027175	+	15	2	656509,656461
ENSSSCG00025055278	-	10	1	3382883
ENSSSCG00025064581	-	13	7	272868,270495,270586,270884,270963,272496,272887
ENSSSCG00025002676	+	305	5	2264001,2266127,2265424,2230813,2265379
ENSSSCG00025002470	-	2	2	424909,473058
ENSSSCG00025035011	-	3	2	274282,432531
ENSSSCG00025007048	+	5	3	3984329,3744372,3984570
ENSSSCG00025027673	-	4	4	560311,561164,568053,580783
ENSSSCG00025006658	+	19	5	1194989,1193769,1196385,1193713,1196404
ENSSSCG00025069074	+	2	1	122601
ENSSSCG00025026876	-	18	2	683284,668305
ENSSSCG00025059422	-	3	1	1071112
ENSSSCG00025012705	+	2	2	889685,891207
ENSSSCG00025003107	+	3	2	586315,586771
ENSSSCG00025001720	-	1	1	176244
ENSSSCG00025053124	+	132	9	1620206,1621023,1621249,1620692,1620077,1620098,1620733,1621065,1624408
ENSSSCG00025070291	-	1	1	2746672
ENSSSCG00025019271	-	9	5	1246881,1243958,1245478,1246798,1336487
ENSSSCG00025054740	-	5	3	2006407,2006783,2015813
ENSSSCG00025030095	+	2	1	175617
ENSSSCG00025077124	-	9	2	834469,833805
ENSSSCG00025004398	-	27	4	1127718,1130280,1127740,1130261
ENSSSCG00025039310	+	89	8	2783765,2769998,2782954,2783736,2770291,2770359,2774767,2782752
ENSSSCG00025003047	-	10	2	81706,96723
ENSSSCG00025046002	+	1	1	123459
ENSSSCG00025070008	+	52	6	1102070,1102475,1038027,1039715,1061183,1102677
ENSSSCG00025075674	-	2	2	2266121,2272135
ENSSSCG00025020784	-	13	2	1377123,1387364
ENSSSCG00025054593	+	3	2	498117,498902
ENSSSCG00025065701	-	1	1	431284
ENSSSCG00025044590	-	255	1	357278
ENSSSCG00025004649	-	24	7	2359936,2360199,2360259,2360359,2360432,2416291,2420171
ENSSSCG00025043170	-	4	2	2845070,2818767
ENSSSCG00025049612	-	10	2	1026495,1026571
ENSSSCG00025076043	-	1	1	63297
ENSSSCG00025034100	-	1	1	67439
ENSSSCG00025026699	-	1	1	79817
ENSSSCG00025076227	+	13	1	358293
ENSSSCG00025049749	-	1	1	578
ENSSSCG00025028441	+	9	3	1090309,1090509,1090562
ENSSSCG00025019295	-	3	1	2166279
ENSSSCG00025076384	+	2	2	544303,556931
ENSSSCG00025004149	-	1	1	1940542
ENSSSCG00025068596	-	6	1	1380402
ENSSSCG00025019125	+	67	1	1613206
ENSSSCG00025063530	+	57	3	3128347,3117745,3128318
ENSSSCG00025013010	+	2	1	690234
ENSSSCG00025028479	-	1	1	1342243
ENSSSCG00025001325	-	6	1	774425
ENSSSCG00025044134	-	31	2	24901,25224
ENSSSCG00025054559	-	8	1	1149453
ENSSSCG00025063228	-	14	2	2083186,2095926
ENSSSCG00025073033	-	5	1	228986
ENSSSCG00025068051	+	1	1	14542
ENSSSCG00025017014	-	3	1	414509
ENSSSCG00025006181	-	1	1	2684176
ENSSSCG00025041729	-	3	3	2374752,2398312,2400009
ENSSSCG00025029310	+	3	3	331723,339952,346356
ENSSSCG00025077102	-	118	4	1087323,1086236,1087289,1088148
ENSSSCG00025071060	-	16	2	3307364,3310564
ENSSSCG00025047988	-	2	2	2924470,2926452
ENSSSCG00025035915	-	4	4	1882744,2024117,2088997,2157581
ENSSSCG00025064718	-	1	1	4459029
ENSSSCG00025048098	+	2	2	922886,947645
ENSSSCG00025006598	+	11	4	2594560,2595237,2553596,2593887
ENSSSCG00025066534	+	10	6	485617,485919,487048,485159,485539,485993
ENSSSCG00025070051	+	4	4	1580275,1582052,1660628,1661062
ENSSSCG00025054371	+	6	1	322102
ENSSSCG00025047172	-	22	2	1047924,1047944
ENSSSCG00025016280	-	20	10	2161484,2156021,2158915,2085848,2090212,2091692,2156967,2189248,2199233,2211943
ENSSSCG00025004913	+	17	4	265891,266011,264716,265789
ENSSSCG00025067738	-	61	2	341115,340132
ENSSSCG00025059597	-	1	1	383288
ENSSSCG00025026174	+	10	4	257008,237830,252492,256922
ENSSSCG00025031751	+	3	3	4643226,4662059,4702737
ENSSSCG00025032272	+	15	10	382442,370593,372198,372261,372378,378621,381868,382461,389123,399180
ENSSSCG00025017785	+	59	6	2059275,2059941,2058980,2059655,2059812,2060137
ENSSSCG00025037807	+	10	2	2690110,2694090
ENSSSCG00025029808	+	11	1	679800
ENSSSCG00025026880	+	1	1	60025
ENSSSCG00025052006	-	33	12	3064777,3064751,3076788,3105324,3107773,3108073,3108094,3122740,3155488,3155872,3240546,3298191
ENSSSCG00025060094	+	4	2	295710,297630
ENSSSCG00025075961	-	2	1	1280423
ENSSSCG00025068479	-	1	1	477799
ENSSSCG00025032254	-	10	1	670173
ENSSSCG00025063098	+	19	3	1489528,1463256,1476177
ENSSSCG00025002329	-	3	2	1345343,1367817
ENSSSCG00025066258	+	4	1	2688599
ENSSSCG00025041594	-	1	1	193930
ENSSSCG00025032653	-	35	3	1043750,1044275,1044550
ENSSSCG00025002161	+	1	1	939178
ENSSSCG00025017141	+	7	2	6095030,6094927
ENSSSCG00025070906	-	11	4	1812369,1812950,1814077,1814363
ENSSSCG00025013530	+	5	2	322726,322828
ENSSSCG00025050603	-	1	1	4700517
ENSSSCG00025006884	-	48	6	2170385,2169871,2170341,2169395,2170292,2170747
ENSSSCG00025000849	+	3	1	2171842
ENSSSCG00025013565	-	4	2	1741721,1741616
ENSSSCG00025035532	+	26	1	1149694
ENSSSCG00025036276	+	19	2	356043,355596
ENSSSCG00025012958	-	90	1	1044266
ENSSSCG00025065519	+	35	5	616624,613059,612589,612966,616645
ENSSSCG00025023761	+	1	1	794878
ENSSSCG00025013068	+	33	6	1673942,1673466,1674213,1670218,1671623,1673184
ENSSSCG00025009610	-	1	1	602726
ENSSSCG00025049132	-	2	2	4120391,4120698
ENSSSCG00025069119	-	15	2	584256,603536
ENSSSCG00025064229	+	4	1	431276
ENSSSCG00025017912	+	10	3	573122,572912,574099
ENSSSCG00025008758	-	1	1	2212135
ENSSSCG00025076485	-	2	1	5335381
ENSSSCG00025064183	+	27	10	938844,939430,903328,938881,940518,885863,911484,921112,938756,940204
ENSSSCG00025005357	+	14	4	5447438,5430587,5439918,5448243
ENSSSCG00025060664	-	2	2	298885,312269
ENSSSCG00025074291	-	38	1	1415650
ENSSSCG00025013910	-	4	3	269841,289590,291342
ENSSSCG00025070605	-	7	3	662980,661240,673894
ENSSSCG00025067823	+	11	5	1444322,1444722,1444303,1444629,1444812
ENSSSCG00025067439	-	30	8	2625857,2619821,2619762,2619902,2619155,2619190,2653236,2671085
ENSSSCG00025045916	+	8	4	3825451,3827341,3827365,3828843
ENSSSCG00025002908	+	2	2	182405,182680
ENSSSCG00025007973	-	4	1	2850780
ENSSSCG00025041456	+	49	7	1341256,1332112,1342136,1332089,1337209,1338082,1341235
ENSSSCG00025069540	-	5	1	4868702
ENSSSCG00025002864	-	1510	27	1994977,1997580,1997067,1995478,1996714,1996334,1995098,1996959,1997287,1997412,2009217,2011070,2020222,1991121,1995455,1995947,1996302,1996923,1997092,1997458,1997539,1997680,1997767,2006385,2035147,2035769,2047703
ENSSSCG00025065215	-	35	1	4255545
ENSSSCG00025001249	+	1	1	1573335
ENSSSCG00025013449	-	12	7	448658,479294,450623,448457,450864,481161,482884
ENSSSCG00025061099	-	49	6	1422573,1418786,1422609,1394680,1405056,1444199
ENSSSCG00025029926	-	34	2	380073,379820
ENSSSCG00025069816	+	14	2	2489833,2489683
ENSSSCG00025047813	+	1	1	1183998
ENSSSCG00025069580	-	2	2	1614029,1614073
ENSSSCG00025064455	-	1	1	1879189
ENSSSCG00025020348	+	16	3	603712,603009,604062
ENSSSCG00025027367	-	1	1	1281259
ENSSSCG00025026657	+	294	8	718475,718022,714980,715082,717972,716722,715053,718456
ENSSSCG00025023373	-	4	4	30964,33389,188295,504894
ENSSSCG00025001996	+	1	1	379135
ENSSSCG00025058725	+	2	1	242148
ENSSSCG00025020672	-	1	1	381770
ENSSSCG00025061762	-	13	1	4047339
ENSSSCG00025051270	-	19	3	9724217,9723504,9724243
ENSSSCG00025033052	+	1	1	5486900
ENSSSCG00025036802	-	1	1	800006
ENSSSCG00025067656	+	1	1	2675402
ENSSSCG00025013149	+	11	3	236872,233784,237274
ENSSSCG00025076572	-	2	2	928015,933096
ENSSSCG00025025073	-	2	1	865421
ENSSSCG00025044227	-	14	2	231160,231200
ENSSSCG00025017176	+	18	1	1711273
ENSSSCG00025035492	+	45	7	4456348,4455282,4455752,4438328,4455441,4455555,4456596
ENSSSCG00025050413	-	24	1	1407723
ENSSSCG00025034614	-	3	2	307903,323111
ENSSSCG00025054451	-	2	2	5799597,5800589
ENSSSCG00025048779	+	32	3	866116,861928,866097
ENSSSCG00025057912	+	7	1	2232734
ENSSSCG00025076871	+	7	3	5286628,5285216,5285675
ENSSSCG00025055279	-	11	2	1911815,1952879
ENSSSCG00025041632	-	21	5	1493192,1493836,1492553,1493160,1493212
ENSSSCG00025052219	-	7	3	1404202,1404226,1404391
ENSSSCG00025014477	+	2	1	2707559
ENSSSCG00025006737	+	1	1	1431778
ENSSSCG00025073609	-	4	1	2155
ENSSSCG00025075675	-	1	1	65394
ENSSSCG00025026170	+	15	3	1532162,1532483,1532680
ENSSSCG00025049895	+	61	2	879307,879252
ENSSSCG00025003756	-	3	1	1515315
ENSSSCG00025056391	+	3	3	5036474,5036600,5037990
ENSSSCG00025031846	-	12	1	665796
ENSSSCG00025051801	-	7	3	155151,155132,155445
ENSSSCG00025027641	-	27	2	818113,816385
ENSSSCG00025017692	-	28	8	430801,520213,438299,523685,523722,525535,546673,577583
ENSSSCG00025029369	-	2	2	70942,82055
ENSSSCG00025026366	+	1013	6	294808,294644,296794,297258,294555,294610
ENSSSCG00025006180	+	15	2	881380,869148
ENSSSCG00025034417	-	6	1	111986
ENSSSCG00025043367	+	9	2	307838,307673
ENSSSCG00025027751	-	29	2	160640,160800
ENSSSCG00025057810	-	161	5	1570712,1570328,1570599,1574530,1595740
ENSSSCG00025015870	-	4	3	1244676,1254739,1280209
ENSSSCG00025028445	-	3	2	6852247,6841943
ENSSSCG00025040670	-	1	1	50562
ENSSSCG00025058303	+	79	7	157566,158317,158109,157547,158161,158209,158290
ENSSSCG00025020513	+	21	1	355196
ENSSSCG00025038676	+	2	2	641176,641401
ENSSSCG00025067669	+	26	7	295654,279739,284033,293778,295616,295695,297850
ENSSSCG00025011990	-	19	1	70883
ENSSSCG00025063841	+	25	8	841304,729085,841549,844359,728143,840787,841350,843380
ENSSSCG00025035918	-	1	1	2153309
ENSSSCG00025076740	-	2	2	1391564,1392605
ENSSSCG00025054233	+	3	1	1822783
ENSSSCG00025074319	+	10	6	951834,970009,866930,950479,951999,988744
ENSSSCG00025068918	-	1	1	3003965
ENSSSCG00025052268	+	1	1	253945
ENSSSCG00025067309	+	1	1	1042124
ENSSSCG00025071202	+	9	6	1595936,1557782,1591515,1616952,1617033,1617099
ENSSSCG00025000309	-	5	1	20288
ENSSSCG00025049894	-	4	2	1218377,1224806
ENSSSCG00025032958	-	19	1	4731
ENSSSCG00025015422	+	7	2	108365,108571
ENSSSCG00025073863	+	1	1	763853
ENSSSCG00025043070	+	5	3	635936,642103,635900
ENSSSCG00025047822	-	1	1	543729
ENSSSCG00025021071	-	9	2	2199272,2199137
ENSSSCG00025031315	-	17	7	679932,680113,679376,679860,681765,796349,837729
ENSSSCG00025069642	+	15	3	661021,662281,658623
ENSSSCG00025037206	-	23	3	859516,859422,865928
ENSSSCG00025017420	+	62	8	319339,319194,319643,319598,260529,312798,313030,313526
ENSSSCG00025003615	+	1	1	38229
ENSSSCG00025030887	+	16	3	1477505,1470884,1477396
ENSSSCG00025029832	-	11	2	146259,147831
ENSSSCG00025048669	+	38	5	393792,379086,393732,392913,393671
ENSSSCG00025073926	-	1	1	8524791
ENSSSCG00025014829	+	6	1	129257
ENSSSCG00025044185	-	17	2	47311,53018
ENSSSCG00025007729	-	6	3	258913,258670,266605
ENSSSCG00025048624	+	8	2	1622713,1623956
ENSSSCG00025069902	+	1	1	906494
ENSSSCG00025037254	+	1	1	456693
ENSSSCG00025030449	+	12	9	1442232,1606549,1670456,1532596,1532908,1534566,1551520,1625975,1644937
ENSSSCG00025075827	-	64	3	727499,746550,777788
ENSSSCG00025062928	-	27	5	3869680,3867222,3868199,3869655,3876830
ENSSSCG00025025445	+	24	7	1486337,1483815,1484777,1484972,1484996,1485237,1485260
ENSSSCG00025037324	-	3	2	944434,945861
ENSSSCG00025067957	-	8	2	646294,646266
ENSSSCG00025044400	+	118	2	2065766,2044929
ENSSSCG00025016860	-	13	3	1254482,1254030,1255107
ENSSSCG00025002446	-	6	3	179242,181000,181079
ENSSSCG00025049923	+	14	6	4662325,4662350,4662450,4662471,4665415,4665753
ENSSSCG00025022175	+	7	5	1591956,1560839,1589839,1590647,1591888
ENSSSCG00025051790	+	1	1	627581
ENSSSCG00025061501	+	14	7	5625934,5617097,5620675,5625839,5625980,5627301,5628144
ENSSSCG00025053387	-	13	6	464506,434914,432863,452372,464426,467490
ENSSSCG00025054417	-	5	2	2673486,2673877
ENSSSCG00025055852	+	1	1	890011
ENSSSCG00025048762	+	6	1	9658833
ENSSSCG00025028213	-	5	4	8236783,8236527,8244968,8250293
ENSSSCG00025047736	-	5	4	667901,667922,668767,668927
ENSSSCG00025059066	+	12	3	2255870,2254201,2255889
ENSSSCG00025062851	+	14	5	395079,395060,391879,396364,398188
ENSSSCG00025015182	-	1	1	2735733
ENSSSCG00025043417	-	19	2	55685,55377
ENSSSCG00025041921	+	7	2	1801878,1779276
ENSSSCG00025062937	-	37	1	356715
ENSSSCG00025059176	-	5	3	2256429,2256465,2269897
ENSSSCG00025072927	+	2	1	6721577
ENSSSCG00025032168	+	57	11	1001431,1003108,1001389,1001157,1002705,1001882,949296,966475,994655,1001409,1003913
ENSSSCG00025029230	-	4	2	920874,932163
ENSSSCG00025071262	-	4	3	2665474,2666447,2699886
ENSSSCG00025017996	-	2	1	5494210
ENSSSCG00025020445	-	30	3	280196,282018,295303
ENSSSCG00025028524	+	5	3	2384312,2384267,2384292
ENSSSCG00025072959	-	7	1	591355
ENSSSCG00025016137	+	4	1	990829
ENSSSCG00025001832	-	1	1	869434
ENSSSCG00025072117	-	1	1	1335105
ENSSSCG00025070988	-	5	2	897139,897165
ENSSSCG00025060435	-	18	3	882246,881661,882292
ENSSSCG00025037630	+	4	1	1478961
ENSSSCG00025051502	-	3	1	1950391
ENSSSCG00025037722	+	71	4	1378720,1377551,1377713,1378541
ENSSSCG00025029286	+	4	1	1589742
ENSSSCG00025010543	-	71	13	315620,317001,315825,317339,315494,316007,316166,317026,317304,317461,317501,317697,317717
ENSSSCG00025026386	-	6	2	1226353,1225551
ENSSSCG00025008657	+	1	1	625580
ENSSSCG00025055180	+	1	1	2973921
ENSSSCG00025006700	+	1	1	992189
ENSSSCG00025058564	-	255	3	2121365,2121115,2121625
ENSSSCG00025014999	+	6	2	3866071,3855174
ENSSSCG00025038695	-	20	1	3294567
ENSSSCG00025076148	+	4	1	422942
ENSSSCG00025071805	-	38	2	1661147,1661178
ENSSSCG00025042373	-	7	4	40542,37932,39308,301470
ENSSSCG00025048385	-	2	2	3101375,3104035
ENSSSCG00025032841	-	774	9	167490,167548,177974,198308,166364,167619,167823,178858,191088
ENSSSCG00025070369	+	3	3	2885091,2885445,2894622
ENSSSCG00025064503	+	5	3	107934,77530,109579
ENSSSCG00025001007	-	14	6	2207076,2207526,2215941,2220958,2231518,2233206
ENSSSCG00025050851	-	1	1	263169
ENSSSCG00025045496	-	35	2	126084,139091
ENSSSCG00025061281	+	25	2	1462399,1462295
ENSSSCG00025054197	+	6	4	1766453,1766535,1766892,1767175
ENSSSCG00025036657	+	1	1	1341525
ENSSSCG00025007651	+	10	1	5103533
ENSSSCG00025060292	-	2	2	933235,1108498
ENSSSCG00025038150	-	1	1	300997
ENSSSCG00025062429	+	22	5	5238876,5238925,5238950,5232019,5232905
ENSSSCG00025000856	+	4	2	92682,92318
ENSSSCG00025075248	-	2	1	3652548
ENSSSCG00025059639	+	5	4	549456,550164,550417,550652
ENSSSCG00025058198	+	1	1	8904819
ENSSSCG00025056468	-	10	4	530588,529970,530550,530905
ENSSSCG00025001113	-	10	2	145333,145304
ENSSSCG00025027766	+	5	3	112707,112081,112681
ENSSSCG00025071358	+	50	1	5555912
ENSSSCG00025072498	+	3	1	6770155
ENSSSCG00025077791	-	20	4	1261048,1270052,1262893,1262864
ENSSSCG00025051443	+	3	1	153366
ENSSSCG00025076143	+	40	3	1532703,1532004,1532068
ENSSSCG00025041874	+	7	1	876124
ENSSSCG00025055876	-	4	1	590659
ENSSSCG00025019439	+	16	1	147190
ENSSSCG00025073327	+	2	1	171024
ENSSSCG00025031954	+	24	4	21681,21614,21743,17449
ENSSSCG00025044534	+	1	1	127755
ENSSSCG00025073939	+	11	2	639822,631985
ENSSSCG00025028079	-	58	4	856967,868901,868922,878227
ENSSSCG00025040391	+	15	1	1836020
ENSSSCG00025008375	+	12	3	1276734,1276705,1294238
ENSSSCG00025025517	-	2	2	1377614,1405817
ENSSSCG00025055529	+	6	4	954044,961904,1000016,1001305
ENSSSCG00025009799	-	4	4	900093,900326,900373,900660
ENSSSCG00025066665	+	7	2	1861355,1861251
ENSSSCG00025056586	+	32	4	1583750,1583598,1583721,1582342
ENSSSCG00025049997	+	15	5	1180069,1169556,1178101,1179699,1180420
ENSSSCG00025027724	-	1	1	628943
ENSSSCG00025020998	-	14	2	1284422,1284869
ENSSSCG00025020077	+	1	1	6828548
ENSSSCG00025044425	+	4	2	774438,775456
ENSSSCG00025004400	-	11	3	796344,801983,800593
ENSSSCG00025051803	+	14	1	1060962
ENSSSCG00025076192	+	1	1	4813665
ENSSSCG00025065697	+	4	3	986477,1003989,1005061
ENSSSCG00025017758	+	4	2	399929,397983
ENSSSCG00025049509	+	28	1	556205
ENSSSCG00025042664	-	47	3	1022470,1020616,1020547
ENSSSCG00025038121	+	2	2	384384,386127
ENSSSCG00025045537	-	10	3	1816981,1816918,1816962
ENSSSCG00025019503	-	5	3	920225,919325,919434
ENSSSCG00025024117	-	6	2	400736,412325
ENSSSCG00025065408	-	7	1	8396
ENSSSCG00025056164	-	7	1	4847436
ENSSSCG00025037867	-	1	1	518185
ENSSSCG00025018860	+	4	3	2100610,2099414,2101779
ENSSSCG00025000660	-	1	1	879607
ENSSSCG00025052281	+	14	5	572086,559044,571800,572019,572252
ENSSSCG00025077667	-	1	1	3287012
ENSSSCG00025014217	-	18	4	1152234,1152167,1172099,1198138
ENSSSCG00025037613	-	2	1	3372706
ENSSSCG00025026222	-	38	2	4837468,4837809
ENSSSCG00025050982	+	16	1	9724264
ENSSSCG00025048822	-	8	3	2869100,2922659,2891080
ENSSSCG00025034162	+	3	2	1798561,1919790
ENSSSCG00025061547	+	1	1	1350516
ENSSSCG00025058027	-	29	5	940345,940365,939775,940426,963504
ENSSSCG00025049834	-	12	1	3624708
ENSSSCG00025062906	-	84	1	566672
ENSSSCG00025044445	+	7	3	194113,100516,195263
ENSSSCG00025073299	-	2	2	324204,327785
ENSSSCG00025004488	+	61	10	2146882,2146817,2109156,2146568,2010356,2105276,2109682,2119118,2119572,2146645
ENSSSCG00025017609	+	22	3	3220805,3220441,3212556
ENSSSCG00025062779	-	26	3	848703,848278,848666
ENSSSCG00025007229	+	3	1	24131
ENSSSCG00025076751	-	4	3	3019246,3007390,3026508
ENSSSCG00025070125	+	23	3	4264994,4265523,4265580
ENSSSCG00025016870	-	22	4	2591663,2591687,2592443,2597740
ENSSSCG00025017568	+	19	4	432508,344177,432211,433614
ENSSSCG00025065200	-	10	7	1986183,1921934,1922233,1922526,1922982,1943872,1988867
ENSSSCG00025036244	-	1	1	208354
ENSSSCG00025066611	+	43	6	902200,901828,901074,901094,901272,903344
ENSSSCG00025051636	+	158	2	163925,162943
ENSSSCG00025077097	-	33	3	3337558,3338838,3349467
ENSSSCG00025052203	-	1	1	741533
ENSSSCG00025022303	-	1	1	16149
ENSSSCG00025019394	-	1	1	2479713
ENSSSCG00025025702	-	3	3	2213831,2215454,2290494
ENSSSCG00025025101	-	7	4	380726,380680,529082,546692
ENSSSCG00025059067	-	9	4	3580324,3579673,3580960,3716178
ENSSSCG00025012115	-	2	2	955695,955784
ENSSSCG00025068215	+	17	6	74692,59092,52759,53346,74198,74927
ENSSSCG00025039750	-	16	3	422569,418562,438022
ENSSSCG00025050831	+	10	1	660316
ENSSSCG00025048371	+	20	3	296854,280360,288183
ENSSSCG00025045908	-	8	2	980053,980135
ENSSSCG00025067915	-	6	1	805106
ENSSSCG00025023558	-	1	1	817512
ENSSSCG00025015958	-	20	2	153969,153779
ENSSSCG00025050025	+	35	1	1464946
ENSSSCG00025043291	-	2	1	525270
ENSSSCG00025057614	+	16	6	329651,329310,224244,320166,328178,328198
ENSSSCG00025073721	-	5	3	2025319,2024135,2025792
ENSSSCG00025068102	-	23	5	1444365,1445000,1444674,1444862,1448239
ENSSSCG00025058261	+	88	6	461890,460578,459332,460163,460478,462138
ENSSSCG00025058436	-	8	6	2922351,2922442,2922541,2923059,2940857,3070869
ENSSSCG00025001850	+	2	2	258624,258761
ENSSSCG00025064024	+	218	14	5460058,5460037,5457962,5459547,5457894,5457938,5459516,5459486,5459988,5447508,5448386,5457748,5458193,5459764
ENSSSCG00025000244	+	1	1	12814
ENSSSCG00025059224	-	7	2	415283,414702
ENSSSCG00025029309	+	285	5	100965,100945,99425,99826,100218
ENSSSCG00025022211	+	12	2	1246405,1246227
ENSSSCG00025024586	-	5	3	1257811,1256763,1258068
ENSSSCG00025033616	-	6	1	427774
ENSSSCG00025027703	+	3	3	214152,329122,330429
ENSSSCG00025057657	+	13	5	2288572,2288696,2254536,2274479,2288463
ENSSSCG00025072497	-	8	1	708040
ENSSSCG00025039300	-	36	8	645960,646819,645986,647038,647584,648042,653231,705213
ENSSSCG00025070346	+	119	2	2530636,2530581
ENSSSCG00025020132	-	10	3	7994486,7994553,7994580
ENSSSCG00025063760	+	1	1	125770
ENSSSCG00025044387	-	7	4	956594,957139,957505,984292
ENSSSCG00025050236	+	17	9	881463,850574,872174,881505,881548,881968,887571,929949,930343
ENSSSCG00025029291	+	1	1	2529003
ENSSSCG00025063354	-	18	1	409024
ENSSSCG00025066324	-	4	1	492631
ENSSSCG00025076085	-	1	1	383476
ENSSSCG00025054956	-	3	3	29662,122514,122667
ENSSSCG00025017628	+	17	1	823200
ENSSSCG00025029010	-	4	4	833439,841920,842717,918259
ENSSSCG00025068510	-	18	2	229345,235837
ENSSSCG00025031572	-	10	1	495856
ENSSSCG00025063828	+	4	1	5824077
ENSSSCG00025044674	+	1	1	121605
ENSSSCG00025075555	+	11	3	706347,692506,707023
ENSSSCG00025023340	+	4	2	7411897,7386696
ENSSSCG00025069603	+	16	2	1100315,1091095
ENSSSCG00025002067	+	4	3	156307,89418,141805
ENSSSCG00025064005	-	12	1	620475
ENSSSCG00025076180	-	2	1	1318959
ENSSSCG00025054545	+	1	1	118251
ENSSSCG00025012516	+	9	6	268261,249556,433412,433541,434911,435695
ENSSSCG00025032511	-	2	1	986114
ENSSSCG00025020378	+	1	1	203320
ENSSSCG00025019891	-	6	3	3787819,3787839,3798305
ENSSSCG00025057916	+	1	1	2263774
ENSSSCG00025007492	-	2	2	1645090,1669602
ENSSSCG00025032959	+	17	5	119520,234441,235526,232900,233544
ENSSSCG00025031813	+	6	5	88053,89235,89458,89925,89944
ENSSSCG00025037031	+	2	1	657031
ENSSSCG00025016192	-	1	1	1607394
ENSSSCG00025066711	-	19	6	2613990,2612533,2614609,2612833,2621623,2622016
ENSSSCG00025004760	-	5	4	3028106,3019391,3039703,3054466
ENSSSCG00025049483	-	35	3	348149,292171,348406
ENSSSCG00025074814	-	38	1	1502309
ENSSSCG00025067431	-	20	8	1673173,1673145,1673267,1669752,1670180,1672197,1672816,1700279
ENSSSCG00025073612	-	33	4	606486,607895,607615,608024
ENSSSCG00025013081	-	6	4	954409,975024,976238,976347
ENSSSCG00025074734	-	1	1	87508
ENSSSCG00025077690	+	1	1	5322191
ENSSSCG00025048054	-	20	2	28348,29323
ENSSSCG00025077119	-	13	7	490546,491426,514702,514216,522122,530343,530867
ENSSSCG00025053378	-	3	1	2655127
ENSSSCG00025072113	+	8	2	903857,903542
ENSSSCG00025070507	-	25	3	980162,980279,981438
ENSSSCG00025003619	+	21	4	381226,381253,378890,379326
ENSSSCG00025057275	-	1	1	651054
ENSSSCG00025072973	+	83	9	2870596,2857395,2835294,2835824,2868617,2869027,2869300,2870908,2873707
ENSSSCG00025043406	-	2	2	300041,303768
ENSSSCG00025052587	-	7	5	97228,95721,95960,96967,107265
ENSSSCG00025072787	-	1	1	413839
ENSSSCG00025075433	+	25	1	1227051
ENSSSCG00025056309	+	3	3	644703,644725,644835
ENSSSCG00025064848	+	18	1	1511938
ENSSSCG00025039593	+	1	1	709331
ENSSSCG00025055176	+	7	1	1869999
ENSSSCG00025041868	+	1	1	2363671
ENSSSCG00025065312	-	2	2	1021986,1023063
ENSSSCG00025030659	+	138	3	636894,636982,637925
ENSSSCG00025076177	+	1	1	707433
ENSSSCG00025044067	+	5	2	286521,286926
ENSSSCG00025048682	+	29	1	80460
ENSSSCG00025004636	-	3	3	615729,627015,653923
ENSSSCG00025072633	+	2	1	1280669
ENSSSCG00025032150	+	15	1	933209
ENSSSCG00025073171	-	4	2	1467485,1467514
ENSSSCG00025077024	-	1	1	4957712
ENSSSCG00025064158	-	1	1	176926
ENSSSCG00025019850	+	15	4	880052,877100,878129,880229
ENSSSCG00025016730	+	124	6	1534690,1534839,1535653,1510793,1511163,1525372
ENSSSCG00025052770	-	5	2	5359311,5361033
ENSSSCG00025050251	-	4	1	1386708
ENSSSCG00025052285	+	32	10	387416,388194,388042,318485,384322,384904,387543,387746,387860,388009
ENSSSCG00025047817	+	8	1	1086239
ENSSSCG00025016081	+	9	1	1401946
ENSSSCG00025069728	-	10	1	555096
ENSSSCG00025051304	-	26	2	1061567,1064129
ENSSSCG00025024405	+	26	9	92923,78841,66645,83620,89097,92971,93004,93135,93670
ENSSSCG00025057498	+	2	2	224703,245986
ENSSSCG00025072738	-	21	3	4416149,4440006,4416868
ENSSSCG00025017220	-	6	4	795656,797490,797584,798146
ENSSSCG00025022631	+	1	1	2056337
ENSSSCG00025029645	-	15	3	4261496,4261002,4261273
ENSSSCG00025030054	+	7	1	929535
ENSSSCG00025034543	-	2	2	208849,228495
ENSSSCG00025022450	+	35	9	3206720,3206621,3206673,3204936,3204518,3206114,3206240,3206907,3208024
ENSSSCG00025006411	+	19	1	1246393
ENSSSCG00025030959	-	1	1	461360
ENSSSCG00025074182	-	11	2	3914324,3920635
ENSSSCG00025046732	+	5	1	1720379
ENSSSCG00025043061	-	2	2	273611,276314
ENSSSCG00025064943	-	9	4	68574,74998,81437,74898
ENSSSCG00025032877	+	107	2	344966,344943
ENSSSCG00025017669	-	2	1	1947554
ENSSSCG00025047744	+	1	1	183736
ENSSSCG00025062155	-	22	3	523254,523311,521144
ENSSSCG00025006454	-	6	2	991881,994051
ENSSSCG00025071187	+	7	5	77491,104371,104580,105062,105670
ENSSSCG00025059983	-	12	1	5434627
ENSSSCG00025010745	-	4	3	106781,107195,107380
ENSSSCG00025014965	-	7	3	1889425,1877705,1877855
ENSSSCG00025033129	+	118	5	2645961,2645593,2645821,2627505,2645623
ENSSSCG00025066605	-	2	2	3846233,3848343
ENSSSCG00025007987	+	18	8	2215700,2335220,2335201,2337047,2333801,2336011,2337798,2338034
ENSSSCG00025076790	+	8	1	2890295
ENSSSCG00025047123	+	44	3	2679463,2679326,2679350
ENSSSCG00025026849	+	47	4	4080928,4080909,4075007,4081616
ENSSSCG00025020652	+	106	3	7993953,7989438,7993496
ENSSSCG00025033392	-	3	1	2654683
ENSSSCG00025016661	+	2	1	449954
ENSSSCG00025032626	-	5	3	1355594,1355661,1367726
ENSSSCG00025066656	+	8	1	2683372
ENSSSCG00025001159	+	3	1	681959
ENSSSCG00025005349	-	3	1	208855
ENSSSCG00025065003	+	97	5	1017458,1017513,1007842,1016341,1019742
ENSSSCG00025028390	-	13	5	10783,9569,10210,10856,11122
ENSSSCG00025062212	-	3	2	1387501,1387702
ENSSSCG00025062486	-	74	5	986681,986404,986497,989343,993356
ENSSSCG00025032171	+	29	6	985482,985252,986975,985096,963909,977178
ENSSSCG00025016878	+	6	2	2786009,2783693
ENSSSCG00025035502	-	2	1	3363802
ENSSSCG00025044450	+	5	1	123291
ENSSSCG00025077590	-	1	1	4561274
ENSSSCG00025029517	+	1	1	1374822
ENSSSCG00025012931	-	23	3	2218322,2218709,2218735
ENSSSCG00025048667	+	17	3	1876547,1876054,1876893
ENSSSCG00025073856	+	1	1	1479087
ENSSSCG00025023507	-	85	13	1127864,1125964,1145965,1127316,1170547,1124042,1124179,1127675,1167788,1170514,1171983,1181217,1181259
ENSSSCG00025019381	-	7	1	61403
ENSSSCG00025000247	+	1	1	709610
ENSSSCG00025055641	-	2	1	1412613
ENSSSCG00025074014	-	61	8	157406,157776,157994,156923,158240,157071,155702,157718
ENSSSCG00025060571	-	12	1	20418
ENSSSCG00025009622	-	2	2	2037755,2038505
ENSSSCG00025046955	+	13	1	2614550
ENSSSCG00025050106	-	2	1	825716
ENSSSCG00025051328	+	1	1	4854786
ENSSSCG00025046802	+	2	2	1585350,1587298
ENSSSCG00025024725	-	2	1	4257322
ENSSSCG00025073633	+	13	3	114338,114434,114543
ENSSSCG00025056654	-	46	5	658380,658178,657512,659991,674433
ENSSSCG00025033215	-	14	5	1368889,1368928,1370592,1369098,1370157
ENSSSCG00025018528	+	3	2	1254312,1254090
ENSSSCG00025012999	+	2	1	2035818
ENSSSCG00025017890	-	4	3	680379,681938,682512
ENSSSCG00025043581	-	3	1	310637
ENSSSCG00025022583	-	32	6	693854,693912,694156,697875,697897,697918
ENSSSCG00025070155	+	3	1	3092255
ENSSSCG00025000693	+	36	9	41833,41256,42149,33809,37172,37503,40879,41234,42456
ENSSSCG00025069480	+	13	2	890760,848370
ENSSSCG00025067039	+	9	2	2925959,2926656
ENSSSCG00025049556	-	6	1	1849854
ENSSSCG00025050597	-	17	1	9717859
ENSSSCG00025065953	-	101	3	623338,623399,623367
ENSSSCG00025075822	-	1	1	95754
ENSSSCG00025015147	-	7	2	1283073,1283052
ENSSSCG00025055400	-	38	5	28295,27371,49166,57526,107140
ENSSSCG00025077193	-	1	1	4483677
ENSSSCG00025056717	+	2	2	74407,78125
ENSSSCG00025014475	+	62	4	437134,437045,437019,437067
ENSSSCG00025034788	+	17	6	762800,761366,762519,754831,755608,764685
ENSSSCG00025007817	-	6	2	450979,566095
ENSSSCG00025033884	-	2	2	721788,722041
ENSSSCG00025066735	-	4	2	382925,393226
ENSSSCG00025052151	+	18	5	3135894,3113034,3134152,3134177,3136199
ENSSSCG00025044566	-	45	6	3116761,3116476,3116388,3116740,3116409,3116601
ENSSSCG00025054360	+	7	3	1492502,1486768,1492526
ENSSSCG00025061191	+	33	4	498998,499666,498585,499643
ENSSSCG00025023424	-	3	2	1697054,1695960
ENSSSCG00025062602	-	3	3	34417,35902,46370
ENSSSCG00025063377	+	2	1	3312214
ENSSSCG00025067235	-	8	2	1219026,1314896
ENSSSCG00025048285	-	13	10	71534,71874,72161,73264,73732,74134,83145,83349,83468,86824
ENSSSCG00025023007	-	26	9	689064,706589,750596,689086,706343,706783,740005,803816,815537
ENSSSCG00025063048	-	12	3	597617,596731,594775
ENSSSCG00025050471	+	30	2	98092,98070
ENSSSCG00025006989	+	20	7	63933,65220,63599,63323,63481,63502,65344
ENSSSCG00025004173	-	4	2	2182829,2395268
ENSSSCG00025076746	-	17	5	5148024,5165210,5148679,5149361,5167386
ENSSSCG00025053617	-	1	1	10219260
ENSSSCG00025016446	-	11	2	145359,145117
ENSSSCG00025060005	+	6	2	4368630,4367588
ENSSSCG00025030863	-	1	1	3408509
ENSSSCG00025019711	+	1	1	6670316
ENSSSCG00025072677	-	8	6	711133,710746,711052,711891,711968,712206
ENSSSCG00025003716	-	26	2	271846,272372
ENSSSCG00025070666	-	3	2	4899707,4900037
ENSSSCG00025060575	-	8	4	831983,831695,832665,860572
ENSSSCG00025025636	-	1	1	368171
ENSSSCG00025060368	+	30	3	2308790,2308204,2308223
ENSSSCG00025027382	+	38	4	497718,496814,497267,498024
ENSSSCG00025017679	-	35	3	5445578,5445608,5445997
ENSSSCG00025034481	+	28	1	5352048
ENSSSCG00025046568	-	6	3	2145038,2139382,2139464
ENSSSCG00025074399	+	7	3	163997,84278,157731
ENSSSCG00025012488	+	2	1	3740875
ENSSSCG00025007038	+	6	1	1418675
ENSSSCG00025040163	+	6	2	112178,85273
ENSSSCG00025033251	-	4	2	26810,29838
ENSSSCG00025072912	+	8	7	1004497,1006416,1008670,1029024,1058696,1067727,1107424
ENSSSCG00025053393	+	7	1	709871
ENSSSCG00025064065	+	6	1	3559967
ENSSSCG00025049537	-	16	3	651339,649851,651366
ENSSSCG00025034014	+	96	13	5219157,5219789,5219615,5220096,5218397,5218925,5220815,5222500,5164867,5197921,5219086,5220219,5220311
ENSSSCG00025061687	+	7	3	30266,23141,30028
ENSSSCG00025072570	-	8	1	2903177
ENSSSCG00025064832	+	3	1	9094953
ENSSSCG00025002814	+	42	13	961557,1000000,945221,945252,893542,896185,897384,898200,919047,922878,961756,995273,995351
ENSSSCG00025013608	-	12	1	120372
ENSSSCG00025028122	-	4	3	1492613,1532557,1560402
ENSSSCG00025043330	-	4	2	1182967,1183908
ENSSSCG00025066265	-	5	2	1930541,1884478
ENSSSCG00025016358	+	1	1	200975
ENSSSCG00025002871	+	9	1	208715
ENSSSCG00025064878	+	1	1	5622409
ENSSSCG00025041317	+	10	2	249935,249862
ENSSSCG00025070579	+	27	2	2410592,2414464
ENSSSCG00025027520	+	3	1	763638
ENSSSCG00025052687	-	8	2	658571,658821
ENSSSCG00025014662	-	10	3	39012,39202,38884
ENSSSCG00025006968	+	2	2	3611334,3611359
ENSSSCG00025056700	-	70	7	2832743,2617090,2832643,2615908,2630371,2832926,2832964
ENSSSCG00025043847	+	1	1	669436
ENSSSCG00025039202	-	12	5	1056307,1056178,1057464,1057791,1120858
ENSSSCG00025037271	-	75	7	876660,875966,876537,876778,875719,876428,874917
ENSSSCG00025072896	+	1	1	647732
ENSSSCG00025001849	-	10	1	631718
ENSSSCG00025013763	-	83	2	286666,286691
ENSSSCG00025006162	-	4	2	764292,763549
ENSSSCG00025066282	+	14	4	1624761,1624784,1624825,1613722
ENSSSCG00025005285	-	3	2	178396,177481
ENSSSCG00025030613	-	7	2	559769,569599
ENSSSCG00025001101	+	3	2	179708,180580
ENSSSCG00025034021	-	11	3	3132586,3143767,3145292
ENSSSCG00025013060	-	6	1	4412360
ENSSSCG00025058546	-	1	1	984372
ENSSSCG00025015946	-	2	1	3391116
ENSSSCG00025070048	+	1	1	1071992
ENSSSCG00025062133	-	4	1	2531895
ENSSSCG00025070089	-	6	3	540362,540999,541299
ENSSSCG00025003603	+	4	2	2241457,1700486
ENSSSCG00025005206	+	24	3	3004035,2978194,3000905
ENSSSCG00025034927	-	5	1	321343
ENSSSCG00025033905	-	2	2	5493357,5494029
ENSSSCG00025012038	-	13	2	2108621,2129684
ENSSSCG00025064569	-	88	5	2304555,2303699,2303152,2303339,2304581
ENSSSCG00025008062	-	4	3	396612,394114,396558
ENSSSCG00025006132	+	6	2	125147,56710
ENSSSCG00025075678	-	31	2	4108703,4113026
ENSSSCG00025073689	+	1	1	545710
ENSSSCG00025055543	+	2	1	830757
ENSSSCG00025018641	+	7	2	5884943,5885749
ENSSSCG00025062152	+	1	1	1510582
ENSSSCG00025024585	-	10	3	907770,908624,909394
ENSSSCG00025048447	-	30	2	586416,586448
ENSSSCG00025029360	-	139	9	631466,629988,631570,632142,630442,631761,631881,632119,662550
ENSSSCG00025008761	-	21	5	3453556,3454125,3452013,3452038,3457207
ENSSSCG00025074477	+	49	6	944842,883120,883632,883670,944032,944159
ENSSSCG00025037060	+	4	2	98648,95183
ENSSSCG00025016914	+	8	4	550025,550046,550414,551645
ENSSSCG00025049896	-	2	1	89643
ENSSSCG00025046294	-	24	1	482013
ENSSSCG00025074587	+	1	1	63478
ENSSSCG00025048786	-	1	1	3745924
ENSSSCG00025057108	-	2	1	524635
ENSSSCG00025013103	+	7	4	1196914,1188006,1191599,1192791
ENSSSCG00025060757	-	28	5	7689753,7691362,7963329,7982578,8209590
ENSSSCG00025027735	+	1	1	225806
ENSSSCG00025018476	+	1	1	54428
ENSSSCG00025042915	-	24	4	4081315,4081721,4082050,4082493
ENSSSCG00025031899	+	2	2	87695,90487
ENSSSCG00025007710	+	11	1	3068035
ENSSSCG00025007301	-	9	3	24764,25288,25474
ENSSSCG00025070367	-	1	1	658592
ENSSSCG00025017323	+	15	8	1986193,1993709,1994034,1954386,1959235,1990448,1996296,1997705
ENSSSCG00025007058	+	14	1	99149
ENSSSCG00025000357	+	7	2	333576,333551
ENSSSCG00025071664	-	28	2	197519,196913
ENSSSCG00025005170	+	13	5	5134729,5134925,5134263,5135035,5136375
ENSSSCG00025063988	-	5	1	54108
ENSSSCG00025029179	+	1	1	1729773
ENSSSCG00025062329	+	17	5	1609647,1610247,1604479,1609095,1610640
ENSSSCG00025026055	-	35	11	19512,61939,14777,19323,19619,22258,24170,65921,93482,133508,135340
ENSSSCG00025065767	+	55	7	1372298,1361089,1371682,1371810,1371927,1372447,1372990
ENSSSCG00025076551	+	8	1	3008388
ENSSSCG00025055939	-	1	1	1699813
ENSSSCG00025015347	-	4	1	2462921
ENSSSCG00025016390	-	11	1	1668962
ENSSSCG00025074300	-	2	2	1871009,2009615
ENSSSCG00025047821	+	2	2	22694,62873
ENSSSCG00025017427	+	18	3	214353,214322,221595
ENSSSCG00025024226	+	4	2	3664228,3645654
ENSSSCG00025012508	-	43	7	1654966,1653031,1754679,1652505,1653102,1653537,1721658
ENSSSCG00025063043	+	51	1	1996482
ENSSSCG00025057700	+	3	2	654864,654567
ENSSSCG00025012496	+	2	1	2609529
ENSSSCG00025074138	+	12	3	796314,796294,770122
ENSSSCG00025070815	-	4	3	481728,481751,490695
ENSSSCG00025015676	+	3	1	470589
ENSSSCG00025048925	+	1	1	2079999
ENSSSCG00025051213	+	4	3	2241633,2142252,2172913
ENSSSCG00025059883	-	6	5	58524,54267,55016,55973,60284
ENSSSCG00025011616	-	17	5	508770,508804,509536,510192,510304
ENSSSCG00025077132	+	69	9	1708119,1710844,1684728,1708916,1709390,1709700,1709719,1710285,1710355
ENSSSCG00025046317	-	54	5	1145879,1145151,1143364,1145850,1147113
ENSSSCG00025006487	-	1	1	1026154
ENSSSCG00025048049	+	90	1	2538190
ENSSSCG00025023603	+	6	4	1516562,1574165,1574188,1574459
ENSSSCG00025064224	+	6	1	237002
ENSSSCG00025004297	-	14	5	404766,400131,404099,404796,406694
ENSSSCG00025071024	+	9	2	75814,75792
ENSSSCG00025057177	+	142	6	499846,452727,467069,473377,494047,509081
ENSSSCG00025030945	+	2	2	231810,232460
ENSSSCG00025024711	-	5	3	186871,186466,205328
ENSSSCG00025022970	+	2	1	5850
ENSSSCG00025068210	-	102	14	21600,19831,19877,18587,18772,57882,17351,19509,34326,68180,70713,75893,117863,285491
ENSSSCG00025058422	-	79	4	1371845,1372466,1372903,1372590
ENSSSCG00025041198	+	20	3	636811,615918,634552
ENSSSCG00025029307	-	30	7	612523,612597,612618,613317,613428,613516,613800
ENSSSCG00025010018	-	18	8	923508,942293,923479,902443,941623,946361,950225,961677
ENSSSCG00025033452	+	2	1	37736
ENSSSCG00025016269	+	2	1	233466
ENSSSCG00025052236	+	13	3	183923,183858,183890
ENSSSCG00025068903	+	184	2	202724,202638
ENSSSCG00025024238	-	20	5	899965,900130,900173,900633,906625
ENSSSCG00025024631	+	11	2	2015482,2015741
ENSSSCG00025073766	+	1	1	328485
ENSSSCG00025053951	+	3	1	1363075
ENSSSCG00025035752	+	6	4	1680600,1649223,1679528,1679820
ENSSSCG00025014058	+	59	2	1904553,1904532
ENSSSCG00025066264	-	10	3	210836,214343,209620
ENSSSCG00025017293	+	1	1	489148
ENSSSCG00025021420	+	14	2	1340887,1340912
ENSSSCG00025051418	+	11	4	324342,307985,321728,322558
ENSSSCG00025057011	+	3	2	826810,716555
ENSSSCG00025020094	+	1	1	1537461
ENSSSCG00025071315	+	4	1	195896
ENSSSCG00025030953	+	14	1	313721
ENSSSCG00025025213	+	4	1	2015535
ENSSSCG00025029525	-	18	2	44851,47999
ENSSSCG00025037108	-	25	4	3150,1235,1064,3173
ENSSSCG00025060587	-	39	3	748424,713646,714093
ENSSSCG00025021662	+	96	8	844601,677960,844669,844533,771575,777572,843377,844436
ENSSSCG00025011402	+	26	10	2228826,2246734,2247593,2199537,2207911,2211939,2248223,2262109,2262171,2262392
ENSSSCG00025012912	+	22	6	3852400,3852714,3818040,3823597,3852811,3857316
ENSSSCG00025028758	-	1	1	508758
ENSSSCG00025060231	+	13	2	417929,417989
ENSSSCG00025068241	+	5	2	793046,793438
ENSSSCG00025065626	+	3	2	285608,282393
ENSSSCG00025070110	+	1	1	1211700
ENSSSCG00025024432	-	12	2	654603,676028
ENSSSCG00025001631	+	4	4	525395,623413,857196,858149
ENSSSCG00025075171	-	7	2	382254,382560
ENSSSCG00025054191	+	7	4	8323451,8324413,8323580,8323752
ENSSSCG00025000915	-	19	6	142600,146456,142761,143639,146141,147067
ENSSSCG00025027816	-	1	1	226867
ENSSSCG00025056460	+	27	4	1742168,1740860,1742143,1742327
ENSSSCG00025077211	+	14	5	3530728,3530410,3571660,3524596,3535107
ENSSSCG00025017058	-	4	3	1278327,1283015,1284493
ENSSSCG00025046916	+	4	1	9626880
ENSSSCG00025000983	-	13	4	567492,566633,566492,567129
ENSSSCG00025015113	-	7	2	1703388,1701696
ENSSSCG00025019855	-	10	2	1362010,1360723
ENSSSCG00025039494	+	3	1	167502
ENSSSCG00025067350	-	2	2	706581,730870
ENSSSCG00025053348	+	3	2	1763997,1754929
ENSSSCG00025007877	+	17	2	2001342,2001803
ENSSSCG00025054490	+	1	1	899436
ENSSSCG00025013538	+	691	4	1036627,1027688,1036518,1036563
ENSSSCG00025066636	+	4	1	5199739
ENSSSCG00025045728	+	2	2	2425500,2425801
ENSSSCG00025060968	+	102	13	1519637,1520735,1521716,1513002,1513430,1514981,1516014,1492133,1514702,1515040,1517597,1519614,1521692
ENSSSCG00025053211	-	26	2	677361,677566
ENSSSCG00025066498	+	11	1	2606951
ENSSSCG00025065773	+	9	1	3610995
ENSSSCG00025006840	-	11	3	1437080,1437480,1439505
ENSSSCG00025027133	-	9	2	1059260,1059238
ENSSSCG00025033540	+	1	1	168564
ENSSSCG00025076027	-	1	1	904918
ENSSSCG00025063539	+	7	5	1404329,1400187,1403716,1404299,1406057
ENSSSCG00025007867	+	60	17	248754,231958,247057,91085,159791,215315,235631,241039,244521,247160,247339,247425,247566,247621,248938,248966,249170
ENSSSCG00025012102	+	1	1	3467430
ENSSSCG00025062359	-	3	2	204166,204488
ENSSSCG00025045621	-	6	5	1849903,1850391,1883521,1885056,1901551
ENSSSCG00025033145	+	9	3	2098836,2098575,2099308
ENSSSCG00025075959	-	48	3	4271169,4272263,4272367
ENSSSCG00025023749	-	4	2	197944,198143
ENSSSCG00025077623	+	23	6	2944347,2944446,2944492,2944286,2944716,2945177
ENSSSCG00025060682	+	2	1	478438
ENSSSCG00025017030	-	134	8	250211,250293,250233,253494,249556,250339,203303,248270
ENSSSCG00025052423	-	4	1	1019393
ENSSSCG00025073343	+	20	5	2520001,2513300,2520026,2517047,2518597
ENSSSCG00025018942	-	4	1	560306
ENSSSCG00025037838	+	17	8	318285,318610,222690,253568,318319,319020,319932,320095
ENSSSCG00025029620	+	89	2	5230389,5228732
ENSSSCG00025039101	+	1	1	160027
ENSSSCG00025002977	-	1	1	208232
ENSSSCG00025037372	-	46	1	1677671
ENSSSCG00025066560	+	1	1	24808
ENSSSCG00025075703	-	1	1	1222664
ENSSSCG00025057854	-	1	1	3668745
ENSSSCG00025076781	-	10	1	213052
ENSSSCG00025009413	-	3	2	995098,995186
ENSSSCG00025041547	+	5	3	2201631,2207906,2208613
ENSSSCG00025068806	+	1	1	987950
ENSSSCG00025006378	+	2	2	1207451,1208258
ENSSSCG00025013177	+	2	1	427710
ENSSSCG00025004689	+	24	3	2868864,2868891,2868992
ENSSSCG00025011494	-	4	1	48495
ENSSSCG00025064918	-	10	1	722570
ENSSSCG00025035189	+	15	4	296134,295929,296403,296930
ENSSSCG00025049500	+	3	3	11556,11581,17872
ENSSSCG00025045117	+	5	4	1227292,1227481,1229096,1230668
ENSSSCG00025056993	+	20	3	8884277,8882875,8831346
ENSSSCG00025024049	-	26	8	1003228,1002450,1070685,1002683,1002906,1004004,1031892,1081458
ENSSSCG00025061646	-	3	2	2226504,2234507
ENSSSCG00025028203	+	11	3	1448651,1448568,1448782
ENSSSCG00025002884	-	3	2	428905,441383
ENSSSCG00025053680	-	209	7	178210,178965,177545,177588,178259,179656,180025
ENSSSCG00025058590	+	3	2	1232563,1233338
ENSSSCG00025068083	-	1	1	1793564
ENSSSCG00025051252	-	4	3	1161534,1162408,1163009
ENSSSCG00025038754	-	3	2	2040048,2074120
ENSSSCG00025044794	+	4	3	1867601,1866996,1867645
ENSSSCG00025012122	+	3	2	3822247,3822275
ENSSSCG00025031718	+	13	2	729917,729884
ENSSSCG00025072321	+	1	1	1990557
ENSSSCG00025018263	-	36	1	10356
ENSSSCG00025076041	-	7	2	640024,640737
ENSSSCG00025018160	+	3	1	1652835
ENSSSCG00025005266	+	2	2	1890189,1893190
ENSSSCG00025014319	+	1	1	1365802
ENSSSCG00025077582	-	3	2	1488858,1489857
ENSSSCG00025077235	-	3	1	2046444
ENSSSCG00025065000	-	2	1	1604
ENSSSCG00025059570	+	60	3	208592,207735,208572
ENSSSCG00025054380	-	6	1	2704705
ENSSSCG00025008111	+	3	1	718145
ENSSSCG00025012612	+	11	1	512627
ENSSSCG00025011541	+	88	2	929821,921443
ENSSSCG00025014740	+	18	4	817803,818418,817262,818353
ENSSSCG00025061202	+	20	3	547823,545755,522344
ENSSSCG00025077122	-	1	1	3390763
ENSSSCG00025055884	+	29	3	1883264,1873656,1884795
ENSSSCG00025011144	+	17	5	673638,673663,674381,675786,675814
ENSSSCG00025050479	+	38	6	991336,961507,962532,984129,1000424,1003579
ENSSSCG00025050655	-	1	1	788438
ENSSSCG00025062871	+	5	4	893941,899354,900579,900599
ENSSSCG00025030656	+	2	1	3867916
ENSSSCG00025034822	+	71	5	425856,425952,425003,425816,426290
ENSSSCG00025010266	-	5	2	270099,270703
ENSSSCG00025074571	-	66	4	2611789,2610501,2611903,2612084
ENSSSCG00025044511	-	38	7	1218393,1218443,1219055,1217456,1217566,1217645,1219082
ENSSSCG00025073523	-	3	2	2359737,2359672
ENSSSCG00025047164	+	7	2	510635,516880
ENSSSCG00025075495	-	16	1	2229720
ENSSSCG00025019744	-	21	2	993537,993694
ENSSSCG00025029048	+	9	3	182940,184568,184889
ENSSSCG00025007895	-	136	6	496258,496156,499064,496867,497425,497513
ENSSSCG00025072520	+	1	1	193789
ENSSSCG00025000935	-	11	1	80174
ENSSSCG00025066196	-	10	9	2560830,2560961,2561065,2561551,2562463,2563450,2563550,2564141,2584138
ENSSSCG00025060696	+	2	1	395903
ENSSSCG00025034917	+	1	1	6303630
ENSSSCG00025003245	+	4	2	148559,134774
ENSSSCG00025066367	-	4	3	402716,401530,411616
ENSSSCG00025018624	+	7	2	877369,877397
ENSSSCG00025067546	+	2	2	761397,761555
ENSSSCG00025052729	+	3	1	1936729
ENSSSCG00025047074	+	3	1	657280
ENSSSCG00025033071	-	1	1	126081
ENSSSCG00025056809	-	12	1	121135
ENSSSCG00025002110	+	3	1	104140
ENSSSCG00025036887	+	1	1	677259
ENSSSCG00025014002	+	2	1	1821739
ENSSSCG00025055640	+	3	2	42903,47548
ENSSSCG00025044681	+	4	1	687503
ENSSSCG00025073946	+	3	3	1428757,1451384,1452105
ENSSSCG00025064587	+	14	4	275403,255650,256326,275262
ENSSSCG00025004920	-	2	2	286428,286720
ENSSSCG00025005796	+	4	3	5668333,5671088,5671963
ENSSSCG00025043799	+	8	4	954336,943860,945092,954365
ENSSSCG00025037272	+	1	1	1309478
ENSSSCG00025061040	-	19	1	2111335
ENSSSCG00025051067	-	1	1	4769173
ENSSSCG00025031064	+	3	2	874735,874758
ENSSSCG00025057243	+	6	1	2374910
ENSSSCG00025038092	-	16	4	2054558,2072176,2054629,2075605
ENSSSCG00025052723	-	2	1	1300606
ENSSSCG00025050582	-	14	2	2094710,2098577
ENSSSCG00025011133	+	4	3	3282017,3282067,3284056
ENSSSCG00025056045	+	1	1	2918508
ENSSSCG00025012207	-	3	3	4555703,4595489,4621196
ENSSSCG00025059519	+	33	1	246134
ENSSSCG00025069312	-	2	1	3165247
ENSSSCG00025042272	+	8	1	1118960
ENSSSCG00025069754	-	15	7	1791566,1792715,1792285,1792366,1792522,1793735,1859728
ENSSSCG00025066538	-	54	8	390981,389936,391119,390335,391309,389731,389765,391830
ENSSSCG00025055802	-	4	2	2042378,2040347
ENSSSCG00025011671	-	29	12	3116708,3113830,3113862,3113560,3113809,3114895,3114962,3115167,3116285,3146677,3150376,3150792
ENSSSCG00025018954	+	23	5	528864,473577,463835,488762,524948
ENSSSCG00025020036	+	38	6	2667964,2683962,2680928,2665186,2684417,2688056
ENSSSCG00025049074	-	4	4	4064077,4064148,4064264,4074354
ENSSSCG00025025832	+	2	1	452510
ENSSSCG00025072087	-	3	1	2838855
ENSSSCG00025026333	+	6	1	3452166
ENSSSCG00025037129	+	14	1	1157619
ENSSSCG00025048151	+	1	1	1264552
ENSSSCG00025007007	+	14	3	1370234,1370339,1371674
ENSSSCG00025025278	-	41	4	2714408,2714346,2711558,2715141
ENSSSCG00025041087	+	2	2	1733925,1734092
ENSSSCG00025055807	-	6	3	29297,32162,32182
ENSSSCG00025037925	-	9	2	1584971,1597801
ENSSSCG00025017759	+	1	1	27316
ENSSSCG00025049388	-	8	3	2032965,2033891,2034452
ENSSSCG00025032555	+	7	1	817326
ENSSSCG00025007802	+	22	5	2566542,2567648,2565206,2565296,2565319
ENSSSCG00025058757	+	32	5	267661,266633,266800,266867,266567
ENSSSCG00025040762	-	73	5	112275,112754,112177,112843,117844
ENSSSCG00025043838	-	32	2	1305989,1304597
ENSSSCG00025043197	-	6	2	101964,102103
ENSSSCG00025054211	+	6	3	2890375,2890485,2890622
ENSSSCG00025076939	+	120	2	2544580,2544559
ENSSSCG00025069530	-	6	6	1956000,1989244,2020256,2024265,2049167,2057984
ENSSSCG00025053497	-	11	3	711333,711362,724780
ENSSSCG00025032112	+	4	3	643725,643860,644114
ENSSSCG00025041505	-	1	1	3905411
ENSSSCG00025006527	-	52	7	2928088,2925977,2927964,2928016,2927449,2954563,2999424
ENSSSCG00025046190	-	8	4	473298,474127,474510,474853
ENSSSCG00025023503	+	2	1	2327352
ENSSSCG00025036285	+	2	1	5661474
ENSSSCG00025040942	+	3	2	1836951,1835983
ENSSSCG00025031483	-	4	1	905570
ENSSSCG00025000004	-	51	1	6108
ENSSSCG00025033283	+	1	1	5529654
ENSSSCG00025030492	+	6	3	451072,450632,451353
ENSSSCG00025015305	+	4	3	459885,462762,480367
ENSSSCG00025023477	+	1	1	291858
ENSSSCG00025075320	+	1	1	1501220
ENSSSCG00025077315	+	20	1	926429
ENSSSCG00025043076	+	1	1	90904
ENSSSCG00025062300	+	1	1	1285080
ENSSSCG00025007066	+	15	3	617033,616873,616936
ENSSSCG00025076045	-	1	1	1466658
ENSSSCG00025057563	-	1	1	1051828
ENSSSCG00025050265	-	1	1	1363529
ENSSSCG00025050522	-	4	2	623333,626866
ENSSSCG00025021396	-	2	2	933224,934340
ENSSSCG00025058685	+	1	1	4378280
ENSSSCG00025032966	+	3	2	53826,117244
ENSSSCG00025016973	-	159	10	117238,115960,114356,116977,128828,114580,116266,116844,119289,156998
ENSSSCG00025052819	+	1	1	1023349
ENSSSCG00025020651	+	11	1	1323401
ENSSSCG00025050624	+	22	3	852109,851982,828799
ENSSSCG00025017762	-	2	1	31389
ENSSSCG00025017529	-	4	2	1738846,1738622
ENSSSCG00025018730	-	7	3	156168,180090,196277
ENSSSCG00025052526	-	5	3	726350,727508,727765
ENSSSCG00025058172	+	4	1	1071108
ENSSSCG00025062876	-	8	4	924318,923024,925869,926125
ENSSSCG00025069926	-	12	3	1095625,1096086,1095989
ENSSSCG00025001559	+	56	10	1241470,1241494,1242293,1241448,1242326,1189271,1239391,1241216,1241573,1241601
ENSSSCG00025010780	-	2	2	524107,559249
ENSSSCG00025000809	+	8	2	687059,687106
ENSSSCG00025043533	+	2	1	1575767
ENSSSCG00025062420	+	1	1	83889
ENSSSCG00025048766	+	3	1	89000
ENSSSCG00025017780	-	28	3	261379,261476,259716
ENSSSCG00025028763	-	13	4	448303,448270,451847,454066
ENSSSCG00025045574	-	2	1	33316
ENSSSCG00025063253	+	9	3	344404,296280,304309
ENSSSCG00025006552	-	16	5	1288631,1288439,1298925,1307409,1362545
ENSSSCG00025001949	+	8	3	5620975,5619451,5621940
ENSSSCG00025067227	-	1	1	300511
ENSSSCG00025004918	+	34	3	1318753,1319072,1320603
ENSSSCG00025059775	-	18	1	46390
ENSSSCG00025033191	+	9	5	2202732,2203690,2133775,2202551,2202600
ENSSSCG00025003696	-	2	1	703271
ENSSSCG00025058019	+	1	1	351357
ENSSSCG00025023395	+	8	1	159525
ENSSSCG00025014568	-	6	5	985792,984878,986269,986348,986409
ENSSSCG00025034467	-	27	7	3150005,3128409,3128367,3129453,3132412,3151886,3152335
ENSSSCG00025045758	-	20	1	5033104
ENSSSCG00025056283	+	1	1	1397523
ENSSSCG00025067121	-	64	15	4025257,4025912,4025063,4022742,4023970,4025089,4025172,4025387,4025456,4025893,4026730,4028210,4046601,4047810,4050948
ENSSSCG00025044250	+	2	2	1828843,1829490
ENSSSCG00025009171	+	36	6	508621,510600,508593,509208,510768,511474
ENSSSCG00025070954	+	1	1	2337583
ENSSSCG00025004189	-	3	3	952187,958633,958950
ENSSSCG00025030782	-	4	2	78510,78729
ENSSSCG00025027948	+	2	2	1751796,1761722
ENSSSCG00025035629	-	8	4	2426184,2423372,2426077,2457775
ENSSSCG00025037552	-	13	1	645193
ENSSSCG00025063212	+	2	1	3366030
ENSSSCG00025037875	-	842	6	1669850,1669872,1670818,1668264,1670159,1670842
ENSSSCG00025015250	+	4	3	3039784,3040128,3040863
ENSSSCG00025051846	+	11	6	1187639,1202509,1156593,1191329,1192006,1202692
ENSSSCG00025041941	-	3	2	24835,24982
ENSSSCG00025024023	-	2	1	40556
ENSSSCG00025007237	-	6	4	562900,564122,573901,581559
ENSSSCG00025065971	-	1	1	4080470
ENSSSCG00025069180	+	82	10	697573,697417,699017,696311,695466,696702,697105,697333,697392,697765
ENSSSCG00025027136	+	5	2	1635453,1635267
ENSSSCG00025063034	-	31	2	1432026,1432045
ENSSSCG00025060769	+	33	4	926808,926717,897612,927293
ENSSSCG00025061812	+	15	3	237153,210872,212988
ENSSSCG00025043664	+	5	1	106375
ENSSSCG00025014725	-	8	1	2857495
ENSSSCG00025048729	-	2	1	8315180
ENSSSCG00025041419	-	5	2	1022063,1046694
ENSSSCG00025010084	-	21	5	263705,263771,263818,264043,271113
ENSSSCG00025011875	-	1	1	274798
ENSSSCG00025035484	-	9	2	316796,318712
ENSSSCG00025040430	+	1	1	262767
ENSSSCG00025007458	+	1	1	433686
ENSSSCG00025010600	+	11	6	2168671,2170326,2187951,2196348,2211640,2213360
ENSSSCG00025028510	-	2	2	2393949,2394065
ENSSSCG00025016511	+	10	2	1259409,1262632
ENSSSCG00025065078	+	2	2	774642,810791
ENSSSCG00025019487	-	6	4	151930,152133,152384,152404
ENSSSCG00025028833	-	1	1	3136
ENSSSCG00025011224	+	12	2	1010314,1001749
ENSSSCG00025014769	+	1	1	455827
ENSSSCG00025077319	+	2	1	3224558
ENSSSCG00025018682	+	49	3	897711,897766,898793
ENSSSCG00025018612	-	9	1	745684
ENSSSCG00025015995	+	69	8	485261,486912,450856,485947,486764,486890,485996,491081
ENSSSCG00025045128	-	5	1	1594556
ENSSSCG00025046635	+	5	2	3349628,3349731
ENSSSCG00025019033	+	3	2	571360,572436
ENSSSCG00025048340	+	3	2	475252,476005
ENSSSCG00025008505	-	2	1	2287267
ENSSSCG00025037125	-	11	6	719726,720841,723013,732703,733755,748573
ENSSSCG00025008127	-	1	1	3214343
ENSSSCG00025038184	-	105	10	510492,511633,511949,511561,510587,512132,509504,509610,511601,511918
ENSSSCG00025043127	+	24	3	1154653,1153848,1154875
ENSSSCG00025075817	+	1	1	1404889
ENSSSCG00025036408	+	62	13	959466,958476,958495,914426,959577,890641,905873,909834,915546,925342,958860,958915,959282
ENSSSCG00025062061	-	8	1	937535
ENSSSCG00025050465	-	6	4	2243092,2243425,2244094,2244250
ENSSSCG00025024102	-	5	3	2850522,2850545,2852088
ENSSSCG00025025605	+	12	4	1225533,1213505,1216097,1225719
ENSSSCG00025008250	+	27	12	491974,489253,492132,489387,489892,491782,491995,492079,492422,493322,493430,494290
ENSSSCG00025045480	-	1	1	653525
ENSSSCG00025022111	+	2	2	2649995,2701942
ENSSSCG00025016416	+	8	2	2341570,2342862
ENSSSCG00025041468	-	1	1	73455
ENSSSCG00025051666	-	63	23	2566461,2389938,2389334,2500809,2506857,2389086,2389451,2389989,2427193,2504149,2523574,2523869,2535288,2535610,2536004,2542936,2549764,2550200,2554259,2556451,2558512,2564173,2631477
ENSSSCG00025036979	+	17	5	242196,242271,242796,241954,242035
ENSSSCG00025051245	-	2	1	1590220
ENSSSCG00025063881	-	2	2	1714591,1715398
ENSSSCG00025046608	-	22	1	89476
ENSSSCG00025063777	+	1	1	441057
ENSSSCG00025014661	+	1	1	4868618
ENSSSCG00025050972	+	4	4	1489326,1510734,1517228,1518088
ENSSSCG00025022080	+	66	5	263133,174787,100787,253297,262591
ENSSSCG00025041995	+	4	3	1306424,1306832,1307019
ENSSSCG00025019261	-	2	2	7966,9272
ENSSSCG00025072371	+	3	3	2951919,2952433,2952457
ENSSSCG00025014017	+	1	1	525896
ENSSSCG00025020828	-	7	2	662463,663640
ENSSSCG00025042198	+	72	4	68151,68125,64494,65420
ENSSSCG00025030135	+	1	1	797623
ENSSSCG00025076196	-	49	5	1790685,1781965,1782703,1793844,1794032
ENSSSCG00025077117	+	9	1	829695
ENSSSCG00025000258	+	1	1	285830
ENSSSCG00025037464	-	11	4	1416084,1422657,1424277,1424297
ENSSSCG00025058700	-	1	1	2253462
ENSSSCG00025065284	-	20	3	861136,1024912,1101635
ENSSSCG00025003784	-	1	1	1094798
ENSSSCG00025044272	-	34	9	103325,94977,97540,94628,95860,96928,97696,117520,177057
ENSSSCG00025061683	-	10	4	1903836,1901434,2195280,2256822
ENSSSCG00025002350	-	4	2	206170,206142
ENSSSCG00025022045	-	1	1	72626
ENSSSCG00025038909	+	13	3	375727,375977,376327
ENSSSCG00025050528	-	2	1	3636539
ENSSSCG00025044631	-	1	1	503205
ENSSSCG00025071078	-	109	7	2959091,2958912,2959432,2959549,2959880,2960066,2969867
ENSSSCG00025048708	+	36	10	4057242,4056160,4012473,4047242,4055707,4056057,4056588,4057083,4057396,4058417
ENSSSCG00025058347	+	2	1	1145288
ENSSSCG00025045415	+	32	2	372172,372147
ENSSSCG00025064009	+	13	3	106489,106279,104640
ENSSSCG00025057458	+	1	1	248404
ENSSSCG00025037300	-	7	4	373210,373725,377718,385668
ENSSSCG00025028709	+	12	1	884305
ENSSSCG00025020662	+	3	1	1379323
ENSSSCG00025040703	+	44	2	1037371,1037352
ENSSSCG00025039345	+	4	2	106783,107001
ENSSSCG00025028201	-	3	2	922892,922921
ENSSSCG00025007526	+	28	8	451106,451082,451141,448739,452218,452296,454373,470368
ENSSSCG00025019416	-	13	7	2302835,2304076,2304616,2304774,2306228,2306386,2307152
ENSSSCG00025013508	+	1	1	1118788
ENSSSCG00025059463	-	1	1	738116
ENSSSCG00025043344	-	23	9	5153366,5155363,5155650,5155784,5156110,5156465,5151323,5152461,5154588
ENSSSCG00025030581	-	714	25	59450,59325,58039,76294,60669,59302,62359,69141,69207,70088,59345,59383,56906,56946,57992,59423,59654,59682,60605,60647,60750,70925,71179,71515,74865
ENSSSCG00025060827	-	7	2	1585640,1586258
ENSSSCG00025004761	+	39	2	249795,249749
ENSSSCG00025040759	-	1	1	3699199
ENSSSCG00025011482	-	45	3	136378,135825,136875
ENSSSCG00025027287	-	1	1	641545
ENSSSCG00025010111	-	1	1	619865
ENSSSCG00025042485	+	4	4	357037,426021,426743,427033
ENSSSCG00025041313	-	3	2	764240,763999
ENSSSCG00025075944	-	6	3	1406344,1406320,1407087
ENSSSCG00025022276	+	27	3	1442432,1441967,1442404
ENSSSCG00025075849	-	59	5	471434,471254,471755,472121,481686
ENSSSCG00025031866	+	1	1	79987
ENSSSCG00025055113	-	1	1	23997
ENSSSCG00025021734	-	1	1	70693
ENSSSCG00025013382	-	1	1	270955
ENSSSCG00025039530	+	167	14	456466,456295,458337,429736,429765,435289,447171,448275,448759,451003,457463,457734,459621,461250
ENSSSCG00025043323	+	59	3	3709826,3708723,3709796
ENSSSCG00025054580	-	12	4	3445469,3445549,3443375,3445295
ENSSSCG00025015862	+	3	1	2224958
ENSSSCG00025033640	+	81	8	653458,653494,618456,624131,642096,652442,654080,654694
ENSSSCG00025060838	+	8	2	248475,248643
ENSSSCG00025004381	+	3	2	777180,777415
ENSSSCG00025028548	+	1	1	174683
ENSSSCG00025071173	+	129	12	1988074,1987486,1957186,1943292,1964304,1987875,1931242,1949075,1951027,1957884,1987448,1988891
ENSSSCG00025040032	-	9	3	3405694,3403938,3405719
ENSSSCG00025045123	+	2	1	1972033
ENSSSCG00025011689	+	2	2	563991,564309
ENSSSCG00025048344	-	25	3	2952027,2951837,2952048
ENSSSCG00025074677	+	45	6	1511582,1508401,1508827,1510388,1511424,1511458
ENSSSCG00025016234	-	1	1	1141072
ENSSSCG00025049872	+	1	1	538938
ENSSSCG00025019158	-	24	2	1401296,1401330
ENSSSCG00025006144	+	15	1	286500
ENSSSCG00025077785	+	7	1	1180932
ENSSSCG00025004354	+	1	1	1875456
ENSSSCG00025048342	+	1	1	672213
ENSSSCG00025074208	+	30	2	727434,727270
ENSSSCG00025023792	-	20	2	160617,162869
ENSSSCG00025056742	+	1	1	1764543
ENSSSCG00025027710	+	2201	7	1707885,1707307,1707529,1707332,1707464,1707708,1710578
ENSSSCG00025053255	-	17	1	4709508
ENSSSCG00025026259	+	8	3	1176216,1110686,1136588
ENSSSCG00025044788	+	41	7	39970,41053,27177,8985,17937,39951,40467
ENSSSCG00025051477	+	21	1	946728
ENSSSCG00025055697	+	3	1	4035947
ENSSSCG00025040371	+	3	2	1458782,1460084
ENSSSCG00025048651	-	14	6	970303,971068,971088,969708,974697,976646
ENSSSCG00025032256	+	18	4	336579,335383,335015,335177
ENSSSCG00025062101	+	6	1	5068082
ENSSSCG00025075063	-	2	2	253767,254536
ENSSSCG00025065580	+	50	5	678930,678175,678209,678605,679143
ENSSSCG00025024336	-	21	7	374205,273798,273876,325483,374148,479499,494207
ENSSSCG00025036756	+	13	2	44581,44558
ENSSSCG00025046391	+	3	1	163773
ENSSSCG00025000632	-	1	1	311444
ENSSSCG00025012272	-	13	3	33504,32619,46469
ENSSSCG00025063664	+	29	1	133435
ENSSSCG00025069602	-	2	2	2443916,2466883
ENSSSCG00025022410	+	3	2	9861,11191
ENSSSCG00025054520	-	10	7	2813515,2946664,2813493,2835332,2890783,2910941,2929085
ENSSSCG00025045187	-	6	1	125579
ENSSSCG00025077318	-	4	2	3155633,3155816
ENSSSCG00025027750	+	4	2	2639737,2639693
ENSSSCG00025073555	-	3	1	2457084
ENSSSCG00025020744	+	4	2	998780,1002016
ENSSSCG00025041261	+	3	2	41191,61338
ENSSSCG00025068454	-	2	1	353831
ENSSSCG00025075798	-	1	1	4379145
ENSSSCG00025061133	-	3	1	1880727
ENSSSCG00025059526	-	2	1	359989
ENSSSCG00025024908	+	16	5	1745406,1743597,1743996,1745198,1745385
ENSSSCG00025047590	-	12	4	1110287,1109507,1109831,1110816
ENSSSCG00025028397	+	16	1	1266740
ENSSSCG00025057778	+	9	5	668664,635720,668466,668696,670115
ENSSSCG00025015335	+	4	2	1616734,1613343
ENSSSCG00025001774	+	8	4	1266695,1266955,1246116,1265770
ENSSSCG00025027631	+	2	2	407638,408668
ENSSSCG00025003820	-	61	6	1771968,1772115,1768635,1770497,1771165,1772051
ENSSSCG00025072301	+	74	3	75701,75488,76764
ENSSSCG00025029041	+	14	8	823242,823427,873952,877676,878265,878551,878677,886552
ENSSSCG00025017349	+	3	3	588534,616541,616808
ENSSSCG00025025597	-	6	3	2314380,2313632,2333090
ENSSSCG00025034689	-	89	10	2726110,2617352,2727178,2619861,2725847,2726641,2727412,2727858,2733885,2778877
ENSSSCG00025036949	-	62	2	1263859,1265134
ENSSSCG00025052484	-	2	1	1817532
ENSSSCG00025022858	-	66	6	1246366,1247287,1247061,1247145,1247442,1272121
ENSSSCG00025076324	-	1	1	1636291
ENSSSCG00025013184	-	2	2	2246648,2249952
[truncated: 6,794 more rows]
