# Supplementary material for: Integrative analysis of transcriptome complexity in pig granulosa cells by long-read isoform sequencing
Source: PeerJ. 2022 May 25;10:e13446. doi: 10.7717/peerj.13446 (PMC9147391; doi:10.7717/peerj.13446)
Supplement: Supplemental Information 5 [file peerj-10-13446-s005.xlsx]

## Sheet: Sheet1
Isoform	Position	Part1_transid	Part2_transid
PBfusion.64	LUXX01048117.1:2433701-2433871:-|LUXX01048117.1:2989215-2989242:-	ENSSSCG00025040040_ENSSSCG00025039201	ENSSSCG00025040040
PBfusion.113	LUXX01039762.1:1602380-1602480:-|LUXX01052712.1:101603-101739:-	ENSSSCG00025022795	ENSSSCG00025056743
PBfusion.52	LUXX01021592.1:400524-400768:+|LUXX01021592.1:729588-729843:+	ENSSSCG00025024992	ENSSSCG00025024992
PBfusion.190	LUXX01023615.1:139204-139764:-|LUXX01088320.1:21297-21639:-	novelGene_68	ENSSSCG00025049208
PBfusion.61	LUXX01038527.1:1331500-1334622:-|LUXX01038527.1:1615617-1616241:-	ENSSSCG00025025709	ENSSSCG00025025709
PBfusion.111	LUXX01039762.1:1590215-1593389:-|LUXX01052712.1:101603-101751:-	ENSSSCG00025022795	ENSSSCG00025056743
PBfusion.141	LUXX01045661.1:89760-91343:+|LUXX01086421.1:195026-195127:+	ENSSSCG00025025889	ENSSSCG00025075440
PBfusion.183	LUXX01019457.1:195308-195608:+|LUXX01035104.1:444-756:+	ENSSSCG00025010160	novelGene_65
PBfusion.66	LUXX01088386.1:2983322-2983538:-|LUXX01083842.1:350824-350974:-	ENSSSCG00025055346	ENSSSCG00025059438
PBfusion.37	LUXX01091873.1:3853380-3853722:+|LUXX01079702.1:373-1941:+	novelGene_11	novelGene_12
PBfusion.32	LUXX01056239.1:151787-151886:-|LUXX01045907.1:3181993-3182092:-	ENSSSCG00025046948_ENSSSCG00025046309	novelGene_9
PBfusion.148	LUXX01097671.1:922216-922268:-|LUXX01046450.1:12702-12852:-	ENSSSCG00025068859	novelGene_53
PBfusion.60	LUXX01038527.1:1331496-1334622:-|LUXX01038527.1:1617002-1617456:-	ENSSSCG00025025709	ENSSSCG00025025709
PBfusion.156	LUXX01095287.1:13346-13584:-|LUXX01009743.1:120009-120134:-	novelGene_ENSSSCG00025058435_AS	ENSSSCG00025000569
PBfusion.53	LUXX01021592.1:400526-400768:+|LUXX01021592.1:729588-731061:+	ENSSSCG00025024992	ENSSSCG00025024992
PBfusion.15	LUXX01061323.1:5635627-5635786:+|LUXX01085978.1:28716-28836:+	ENSSSCG00025064878	ENSSSCG00025077248
PBfusion.49	LUXX01029738.1:319232-319370:+|LUXX01029738.1:890722-891037:+	ENSSSCG00025012053	ENSSSCG00025012053
PBfusion.10	LUXX01034126.1:6871942-6871989:-|LUXX01062592.1:248043-248527:-	ENSSSCG00025031596	novelGene_1
PBfusion.101	LUXX01058684.1:59347-60634:+|LUXX01057616.1:144462-144511:-|LUXX01057616.1:451575-451864:-	ENSSSCG00025074421	ENSSSCG00025040754	ENSSSCG00025042653
PBfusion.21	LUXX01055093.1:49850-49883:-|LUXX01045031.1:1291284-1291384:-	ENSSSCG00025028403	novelGene_4
PBfusion.109	LUXX01039762.1:1590206-1593389:-|LUXX01052712.1:101603-101739:-	ENSSSCG00025022795	ENSSSCG00025056743
PBfusion.107	LUXX01099939.1:125999-126109:-|LUXX01051355.1:1442474-1442937:-	ENSSSCG00025073565	novelGene_39
PBfusion.58	LUXX01021592.1:400622-400768:+|LUXX01021592.1:729588-729843:+	ENSSSCG00025024992	ENSSSCG00025024992
PBfusion.96	LUXX01079103.1:2184492-2184778:+|LUXX01002987.1:379947-380741:+	novelGene_36	ENSSSCG00025004207
PBfusion.163	LUXX01044138.1:593117-593194:+|LUXX01003209.1:89771-90168:+	ENSSSCG00025057246	novelGene_56
PBfusion.84	LUXX01010885.1:129957-130748:+|LUXX01046830.1:1-2497:+	ENSSSCG00025000330	novelGene_33
PBfusion.129	LUXX01079599.1:12296-17141:+|LUXX01051017.1:151722-152118:+	ENSSSCG00025036168	novelGene_43
PBfusion.144	LUXX01066116.1:2901-7042:+|LUXX01083335.1:1063603-1063799:+	novelGene_50	ENSSSCG00025063962
PBfusion.67	LUXX01082897.1:132461-132879:-|LUXX01030339.1:1254559-1254687:-	novelGene_24	ENSSSCG00025017440
PBfusion.106	LUXX01020234.1:150581-150713:-|LUXX01020234.1:590034-590426:-|LUXX01020234.1:872946-873108:-|LUXX01020234.1:1159738-1160291:-	ENSSSCG00025019771	ENSSSCG00025019771	ENSSSCG00025019771	ENSSSCG00025019771
PBfusion.23	LUXX01073635.1:1149116-1149168:-|LUXX01010766.1:1197-1435:-	ENSSSCG00025050489	novelGene_6
PBfusion.42	LUXX01009549.1:3650380-3650478:+|LUXX01065017.1:16163-18017:+	novelGene_14	novelGene_17
PBfusion.127	LUXX01090406.1:64839-66718:+|LUXX01067498.1:331649-331823:+	novelGene_ENSSSCG00025066965_AS	ENSSSCG00025045320
PBfusion.123	LUXX01063170.1:1171198-1171248:+|LUXX01063170.1:1538695-1539490:+	ENSSSCG00025063861	ENSSSCG00025063861
PBfusion.114	LUXX01039762.1:1602380-1602480:-|LUXX01052712.1:101603-101744:-	ENSSSCG00025022795	ENSSSCG00025056743
PBfusion.17	LUXX01026601.1:97494-102062:+|LUXX01035354.1:391414-391495:+	ENSSSCG00025011493	ENSSSCG00025016736
PBfusion.125	LUXX01055891.1:1070782-1070817:+|LUXX01055891.1:1483961-1484854:+	ENSSSCG00025041657	ENSSSCG00025041657
PBfusion.27	LUXX01053029.1:1523558-1523631:+|LUXX01053029.1:1824384-1824819:+	ENSSSCG00025029080	ENSSSCG00025029080
PBfusion.169	LUXX01072672.1:24567-26411:+|LUXX01022702.1:142171-142241:+	ENSSSCG00025038607	ENSSSCG00025021499
PBfusion.47	LUXX01012913.1:365384-365568:+|LUXX01092430.1:2336713-2336843:+	ENSSSCG00025006133	ENSSSCG00025059810
PBfusion.164	LUXX01030870.1:33260-33412:-|LUXX01075708.1:122901-122954:-	novelGene_27	ENSSSCG00025043144
PBfusion.85	LUXX01010885.1:129957-130747:+|LUXX01046830.1:1-2497:+	ENSSSCG00025000330	novelGene_34
PBfusion.30	LUXX01056594.1:4387746-4387815:-|LUXX01007169.1:38540-38662:-	ENSSSCG00025041344	novelGene_ENSSSCG00025006629_AS
PBfusion.191	LUXX01053868.1:13842-15907:-|LUXX01101653.1:1385-2845:-	ENSSSCG00025032759	ENSSSCG00025052785
PBfusion.24	LUXX01073635.1:1149116-1149168:-|LUXX01010766.1:1197-1335:-	ENSSSCG00025050489	novelGene_5
PBfusion.161	LUXX01076956.1:637945-638022:+|LUXX01016027.1:2183-3843:+	ENSSSCG00025038676	ENSSSCG00025030385
PBfusion.118	LUXX01049071.1:243937-244641:+|LUXX01049071.1:476195-476220:+	novelGene_40	novelGene_ENSSSCG00025025254_AS
PBfusion.124	LUXX01059147.1:1547424-1547627:+|LUXX01018142.1:198907-199039:-|LUXX01091584.1:43236-43303:-	novelGene_42	novelGene_ENSSSCG00025027135_AS	ENSSSCG00025053605
PBfusion.79	LUXX01025843.1:156707-156933:-|LUXX01012407.1:1307055-1307121:-	novelGene_29	ENSSSCG00025028538
PBfusion.76	LUXX01009493.1:2215138-2215604:+|LUXX01009493.1:2592767-2594562:+	ENSSSCG00025006598	ENSSSCG00025006598
PBfusion.50	LUXX01036107.1:1840028-1840269:+|LUXX01044184.1:2921672-2922298:+	novelGene_22	ENSSSCG00025039675
PBfusion.103	LUXX01096711.1:59622-60211:+|LUXX01096711.1:682828-682940:+	ENSSSCG00025077684	ENSSSCG00025077684
PBfusion.149	LUXX01097671.1:922216-922268:-|LUXX01046450.1:12702-12828:-	ENSSSCG00025068859	novelGene_52
PBfusion.179	LUXX01040937.1:286066-286227:+|LUXX01101935.1:62007-63712:+	ENSSSCG00025020349	ENSSSCG00025073687
PBfusion.46	LUXX01012913.1:365384-365568:+|LUXX01092430.1:2464942-2465043:+	ENSSSCG00025006133	ENSSSCG00025059810
PBfusion.177	LUXX01008502.1:333501-333561:-|LUXX01037675.1:9285-9645:-	ENSSSCG00025066899	ENSSSCG00025022506
PBfusion.173	LUXX01076984.1:159626-159733:-|LUXX01100358.1:1757-1923:-	ENSSSCG00025041625	ENSSSCG00025072765
PBfusion.176	LUXX01008502.1:333501-333561:-|LUXX01037675.1:9285-9369:-	ENSSSCG00025066899	ENSSSCG00025022506
PBfusion.44	LUXX01045729.1:50256-50519:-|LUXX01019214.1:323610-323793:-	novelGene_19	ENSSSCG00025019190
PBfusion.16	LUXX01023657.1:196901-198494:+|LUXX01021927.1:2145-3450:+	ENSSSCG00025015164	novelGene_3
PBfusion.7	LUXX01027392.1:2308252-2308722:+|LUXX01027392.1:2713449-2714076:+	ENSSSCG00025011261	ENSSSCG00025011261
PBfusion.36	LUXX01055808.1:3943093-3943323:-|LUXX01051589.1:4902-4998:-	novelGene_10	ENSSSCG00025045515
PBfusion.189	LUXX01023615.1:139627-139764:-|LUXX01088320.1:21297-21639:-	ENSSSCG00025013608	ENSSSCG00025049208
PBfusion.145	LUXX01066116.1:2901-4173:+|LUXX01083335.1:1063603-1063799:+	novelGene_49	ENSSSCG00025063962
PBfusion.82	LUXX01070331.1:2584391-2586232:-|LUXX01062794.1:2198076-2198285:+|LUXX01004816.1:15112-15333:+	novelGene_31	ENSSSCG00025049110	novelGene_32
PBfusion.55	LUXX01021592.1:400526-400768:+|LUXX01021592.1:676268-678573:+	ENSSSCG00025024992	ENSSSCG00025024992
PBfusion.116	LUXX01039762.1:1602380-1602478:-|LUXX01052712.1:101601-101796:-	ENSSSCG00025022795	ENSSSCG00025056743
PBfusion.39	LUXX01092329.1:1120123-1121746:+|LUXX01068245.1:1-134:+	ENSSSCG00025076509	novelGene_13
PBfusion.143	LUXX01075035.1:661038-661812:+|LUXX01039748.1:961-1141:+	ENSSSCG00025050918	novelGene_48
PBfusion.134	LUXX01055153.1:605777-605980:+|LUXX01055153.1:1128902-1129734:+	ENSSSCG00025028341	novelGene_44
PBfusion.187	LUXX01007398.1:117765-118020:+|LUXX01052383.1:59300-59905:+	novelGene_66	ENSSSCG00025042383
PBfusion.22	LUXX01055093.1:4868474-4869137:+|LUXX01013030.1:115662-115874:+	ENSSSCG00025027318	ENSSSCG00025005950
PBfusion.57	LUXX01021592.1:400597-400768:+|LUXX01021592.1:729588-730040:+	ENSSSCG00025024992	ENSSSCG00025024992
PBfusion.87	LUXX01010885.1:841189-841337:-|LUXX01010885.1:1220311-1221245:-	ENSSSCG00025001970	ENSSSCG00025001970
PBfusion.78	LUXX01025843.1:58627-58893:-|LUXX01012407.1:1307055-1307121:-	novelGene_28	ENSSSCG00025028538
PBfusion.154	LUXX01012311.1:6403-6988:+|LUXX01014616.1:66172-66266:+	ENSSSCG00025002277	ENSSSCG00025018305
PBfusion.18	LUXX01049648.1:4241762-4242494:-|LUXX01057616.1:110537-112654:-	novelGene_ENSSSCG00025024221_AS	novelGene_ENSSSCG00025040819_AS
PBfusion.115	LUXX01039762.1:1602380-1602477:-|LUXX01052712.1:101603-101765:-	ENSSSCG00025022795	ENSSSCG00025056743
PBfusion.74	LUXX01009493.1:69762-69938:-|LUXX01030870.1:602269-602415:-	ENSSSCG00025001497	ENSSSCG00025014264
PBfusion.159	LUXX01066582.1:678049-678131:+|LUXX01040347.1:112051-112707:+	novelGene_54	ENSSSCG00025027766
PBfusion.65	LUXX01048117.1:3187360-3189062:+|LUXX01099181.1:429-1130:+	ENSSSCG00025041581	novelGene_23
PBfusion.136	LUXX01101500.1:1150002-1150111:-|LUXX01048799.1:40482-40578:-	ENSSSCG00025076834	ENSSSCG00025043915
PBfusion.56	LUXX01021592.1:400526-400768:+|LUXX01021592.1:690706-691762:+	ENSSSCG00025024992	ENSSSCG00025024992
PBfusion.68	LUXX01055318.1:11145-11499:+|LUXX01013888.1:1028060-1028211:+	ENSSSCG00025025743	ENSSSCG00025010998
PBfusion.62	LUXX01038527.1:1331500-1334622:-|LUXX01038527.1:1615617-1616118:-	ENSSSCG00025025709	ENSSSCG00025025709
PBfusion.167	LUXX01071330.1:454396-454483:+|LUXX01052485.1:38368-38650:+	ENSSSCG00025042088	novelGene_58
PBfusion.147	LUXX01093820.1:120698-122219:+|LUXX01075480.1:567977-568254:+	ENSSSCG00025068033	novelGene_51
PBfusion.73	LUXX01086278.1:261013-261234:-|LUXX01036136.1:565522-566644:-|LUXX01036136.1:1243276-1243461:-	ENSSSCG00025066191	novelGene_26	ENSSSCG00025042263
PBfusion.162	LUXX01044138.1:593117-593194:+|LUXX01003209.1:89771-90170:+	ENSSSCG00025057246	novelGene_57
PBfusion.126	LUXX01025926.1:848800-850605:+|LUXX01025926.1:1099377-1101749:+	ENSSSCG00025019424	ENSSSCG00025019424
PBfusion.135	LUXX01024154.1:1181258-1181339:+|LUXX01072341.1:120809-122217:+	novelGene_45	ENSSSCG00025042380
PBfusion.142	LUXX01064140.1:28055-28571:-|LUXX01005759.1:333176-333399:-	novelGene_47	ENSSSCG00025001620
PBfusion.184	LUXX01019457.1:195308-195609:+|LUXX01035104.1:310-756:+	ENSSSCG00025010160	novelGene_63
PBfusion.98	LUXX01010096.1:2093145-2093282:-|LUXX01027506.1:35488-35727:-	novelGene_38	ENSSSCG00025011141
PBfusion.119	LUXX01005737.1:1611058-1611191:-|LUXX01004739.1:41610-42097:-	ENSSSCG00025012133	ENSSSCG00025041262
PBfusion.182	LUXX01019457.1:195308-195609:+|LUXX01035104.1:321-756:+	ENSSSCG00025010160	novelGene_64
PBfusion.48	LUXX01012913.1:365384-365568:+|LUXX01092430.1:2464942-2465043:+	ENSSSCG00025006133	ENSSSCG00025059810
PBfusion.155	LUXX01075089.1:560125-561632:-|LUXX01067698.1:106366-107353:-	ENSSSCG00025056154	ENSSSCG00025047048
PBfusion.28	LUXX01056594.1:2098817-2099038:-|LUXX01056594.1:2661980-2662075:-	ENSSSCG00025045901	ENSSSCG00025045901
PBfusion.168	LUXX01025466.1:10264-10590:-|LUXX01016999.1:126582-126752:-	ENSSSCG00025009920	ENSSSCG00025015192
PBfusion.105	LUXX01021407.1:79466-79699:-|LUXX01088624.1:283071-283607:-	ENSSSCG00025009091	ENSSSCG00025052767_ENSSSCG00025052806
PBfusion.117	LUXX01039762.1:1600689-1602480:-|LUXX01052712.1:101603-101733:-	ENSSSCG00025022795	ENSSSCG00025056743
PBfusion.128	LUXX01010294.1:23941-24311:+|LUXX01071811.1:598888-599015:+	ENSSSCG00025000686	ENSSSCG00025038158
PBfusion.80	LUXX01025843.1:156707-156938:-|LUXX01012407.1:1307055-1307121:-	novelGene_30	ENSSSCG00025028538
PBfusion.31	LUXX01027233.1:4331984-4332062:-|LUXX01041242.1:1145-1329:-	ENSSSCG00025018933	novelGene_8
PBfusion.172	LUXX01020966.1:4706-5887:+|LUXX01096963.1:38707-38773:+	ENSSSCG00025009052	novelGene_61
PBfusion.6	LUXX01027392.1:2308224-2308722:+|LUXX01027392.1:2749576-2753622:+	ENSSSCG00025011261	ENSSSCG00025011261
PBfusion.112	LUXX01039762.1:1602380-1602480:-|LUXX01052712.1:46759-46836:-	ENSSSCG00025022795	ENSSSCG00025056743
PBfusion.41	LUXX01009549.1:276068-276259:-|LUXX01030983.1:67-1057:-	ENSSSCG00025006895	novelGene_16
PBfusion.86	LUXX01010885.1:130613-130748:+|LUXX01046830.1:1-2499:+	ENSSSCG00025000330	novelGene_35
PBfusion.29	LUXX01056594.1:4387746-4387815:-|LUXX01007169.1:38096-38312:-	ENSSSCG00025041344	novelGene_7
PBfusion.108	LUXX01006860.1:106004-106145:-|LUXX01072260.1:1407011-1407129:-	ENSSSCG00025011331	ENSSSCG00025063020
PBfusion.158	LUXX01047606.1:740593-740721:+|LUXX01053763.1:41550-42575:+	ENSSSCG00025029954	ENSSSCG00025031379
PBfusion.110	LUXX01039762.1:1590213-1593386:-|LUXX01052712.1:101603-101770:-	ENSSSCG00025022795	ENSSSCG00025056743
PBfusion.14	LUXX01000468.1:3693848-3695430:+|LUXX01000468.1:3984003-3984329:+	ENSSSCG00025007048	ENSSSCG00025007048
PBfusion.59	LUXX01021592.1:2492842-2492990:-|LUXX01021592.1:2764889-2765041:-	ENSSSCG00025035629	ENSSSCG00025035629
PBfusion.75	LUXX01009493.1:69762-69983:-|LUXX01030870.1:602269-602415:-	ENSSSCG00025001497	ENSSSCG00025014264
PBfusion.122	LUXX01063170.1:1171198-1171249:+|LUXX01063170.1:1398223-1400687:+	ENSSSCG00025063861	novelGene_41
PBfusion.5	LUXX01099915.1:7205165-7205248:+|LUXX01086832.1:127635-129030:+	ENSSSCG00025073260	ENSSSCG00025067753
PBfusion.174	LUXX01076904.1:349401-349535:-|LUXX01070238.1:50685-50908:-|LUXX01024927.1:22553-22707:+	ENSSSCG00025077413	ENSSSCG00025046907	novelGene_62
PBfusion.89	LUXX01008254.1:212015-212226:-|LUXX01046820.1:1050509-1050734:-	ENSSSCG00025004565	ENSSSCG00025028354
PBfusion.130	LUXX01004448.1:1337985-1338148:+|LUXX01039692.1:28307-29542:+	ENSSSCG00025014561	ENSSSCG00025025444
PBfusion.160	LUXX01066284.1:673575-673791:+|LUXX01030684.1:99726-100392:+	novelGene_55	ENSSSCG00025010973
PBfusion.8	LUXX01047513.1:12919-14882:+|LUXX01033168.1:754901-754983:+	ENSSSCG00025024243	ENSSSCG00025014100
PBfusion.178	LUXX01008502.1:333501-333561:-|LUXX01037675.1:1453-1608:-	ENSSSCG00025066899	ENSSSCG00025022506
PBfusion.69	LUXX01055318.1:11145-11499:+|LUXX01013888.1:1028060-1028211:+	ENSSSCG00025025743	ENSSSCG00025010998
PBfusion.40	LUXX01013883.1:99906-99969:-|LUXX01057691.1:2828427-2828553:-	ENSSSCG00025008854	ENSSSCG00025031497
PBfusion.97	LUXX01079103.1:2184609-2184778:+|LUXX01002987.1:379947-380341:+	novelGene_37	ENSSSCG00025004207
PBfusion.140	LUXX01070315.1:313460-313615:-|LUXX01005469.1:1090-1391:-	ENSSSCG00025064581	novelGene_46
PBfusion.188	LUXX01007398.1:117785-118020:+|LUXX01052383.1:59300-59905:+	novelGene_67	ENSSSCG00025042383
PBfusion.11	LUXX01034126.1:6869516-6871989:-|LUXX01062592.1:248043-248532:-	ENSSSCG00025031596	novelGene_2
PBfusion.43	LUXX01009549.1:3650380-3650478:+|LUXX01065017.1:16163-18017:+	novelGene_15	novelGene_18
PBfusion.120	LUXX01005737.1:1611058-1611191:-|LUXX01004739.1:41610-42101:-	ENSSSCG00025012133	ENSSSCG00025041262
PBfusion.45	LUXX01054371.1:3508949-3509141:-|LUXX01093118.1:13316-13488:+|LUXX01090621.1:1874-2256:-	ENSSSCG00025057028	novelGene_20	novelGene_21
PBfusion.51	LUXX01021592.1:400500-400768:+|LUXX01021592.1:729588-731061:+	ENSSSCG00025024992	ENSSSCG00025024992
PBfusion.104	LUXX01015725.1:1843108-1843224:+|LUXX01063600.1:7918-9032:+	ENSSSCG00025019888	ENSSSCG00025061607
PBfusion.19	LUXX01038740.1:5006253-5006426:-|LUXX01093914.1:316116-316214:-	ENSSSCG00025040564	ENSSSCG00025077356
PBfusion.90	LUXX01008254.1:212015-212273:-|LUXX01046820.1:1050509-1050734:-	ENSSSCG00025004565	ENSSSCG00025028354
PBfusion.72	LUXX01019840.1:2792355-2792527:+|LUXX01003289.1:5034-6833:+	ENSSSCG00025009032	novelGene_25
PBfusion.54	LUXX01021592.1:400526-400768:+|LUXX01021592.1:717583-718844:+	ENSSSCG00025024992	ENSSSCG00025024992
PBfusion.20	LUXX01036174.1:170154-171260:+|LUXX01050138.1:2600325-2600902:+	novelGene_ENSSSCG00025048516_AS	ENSSSCG00025033260
PBfusion.171	LUXX01034898.1:453694-453781:+|LUXX01080291.1:22847-24130:-|LUXX01075177.1:1-549:-	ENSSSCG00025018114	novelGene_59	novelGene_60
PBfusion.157	LUXX01047606.1:740593-740721:+|LUXX01053763.1:40132-42573:+	ENSSSCG00025029954	ENSSSCG00025031379
PBfusion.63	LUXX01019479.1:3206951-3207044:-|LUXX01043970.1:125630-125846:-	ENSSSCG00025015432	ENSSSCG00025048882
PBfusion.131	LUXX01004448.1:1337985-1338148:+|LUXX01039692.1:28307-29542:+	ENSSSCG00025014561	ENSSSCG00025025444
PBfusion.70	LUXX01048929.1:128913-129177:-|LUXX01094831.1:888309-888552:-	ENSSSCG00025025130	ENSSSCG00025060575
PBfusion.92	LUXX01086832.1:2375050-2375186:-|LUXX01012726.1:305690-305913:-	ENSSSCG00025054278	ENSSSCG00025018848
