# Supplementary material for: Integrative analysis of transcriptome complexity in pig granulosa cells by long-read isoform sequencing
Source: PeerJ. 2022 May 25;10:e13446. doi: 10.7717/peerj.13446 (PMC9147391; doi:10.7717/peerj.13446)
Supplement: Supplemental Information 6 [file peerj-10-13446-s006.xlsx]

## Sheet: Sheet1
Catergory	GO	Description	Number	Gene
biological_process	GO:0000003	reproduction	306	PB.4475.2,PB.4728.15,PB.6872.1,PB.3931.2,PB.5821.3,PB.6965.1,PB.217.1,PB.5769.24,PB.4719.1,PB.3427.1,PB.5852.52,PB.2165.2,PB.850.44,PB.1345.1,PB.2508.1,PB.6628.2,PB.64.2,PB.217.2,PB.850.36,PB.850.37,PB.2716.2,PB.3418.3,PB.2392.5,PB.3767.3,PB.647.3,PB.5852.25,PB.4515.3,PB.3181.2,PB.7261.2,PB.3523.4,PB.3094.10,PB.850.3,PB.2123.1,PB.4454.2,PB.1524.1,PB.2817.1,PB.6268.2,PB.2862.2,PB.6628.1,PB.867.1,P…
biological_process	GO:0001906	cell killing	25	PB.5408.7,PB.5902.7,PB.5902.19,PB.2221.3,PB.2221.1,PB.5902.4,PB.2221.2,PB.5902.18,PB.5902.16,PB.5408.5,PB.5902.5,PB.7297.2,PB.5902.15,PB.5902.9,PB.5902.1,PB.5408.1,PB.5902.17,PB.5902.21,PB.3142.1,PB.5902.10,PB.6755.2,PB.6755.1,PB.3713.1,PB.7297.1,PB.5902.8
biological_process	GO:0002376	immune system process	487	PB.3597.3,PB.5215.6,PB.4728.18,PB.5902.16,PB.5576.3,PB.4525.2,PB.4251.1,PB.3101.3,PB.1506.1,PB.2918.3,PB.5072.3,PB.3269.5,PB.2116.1,PB.5902.19,PB.4773.4,PB.5215.5,PB.3092.3,PB.3984.2,PB.6878.2,PB.2422.4,PB.5702.10,PB.5852.28,PB.4023.22,PB.6118.5,PB.1237.5,PB.3588.2,PB.4023.14,PB.5769.17,PB.903.1,PB.4641.1,PB.6306.1,PB.3643.3,PB.676.1,PB.5400.1,PB.3142.1,PB.6126.2,PB.7227.21,PB.3159.1,PB.3826.10,P…
biological_process	GO:0007610	behavior	67	PB.6433.1,PB.4023.79,PB.2422.5,PB.602.1,PB.115.1,PB.895.2,PB.4475.3,PB.6463.1,PB.6189.1,PB.4159.1,PB.5648.5,PB.5769.13,PB.5866.1,PB.2694.3,PB.5769.22,PB.3208.1,PB.2422.6,PB.2694.1,PB.2667.2,PB.7478.2,PB.1008.1,PB.6381.2,PB.5519.1,PB.4023.6,PB.1008.3,PB.1178.2,PB.5696.1,PB.4686.4,PB.5696.3,PB.5648.2,PB.3256.1,PB.2603.1,PB.4475.4,PB.2045.4,PB.5769.2,PB.6528.1,PB.6182.1,PB.6783.1,PB.5844.1,PB.4838.1…
biological_process	GO:0008152	metabolic process	2449	PB.4060.3,PB.2916.3,PB.5852.51,PB.47.1,PB.4728.25,PB.394.1,PB.2369.1,PB.4832.3,PB.878.2,PB.3750.3,PB.2738.1,PB.488.3,PB.5067.1,PB.7329.1,PB.4585.2,PB.850.5,PB.5012.2,PB.3445.1,PB.6159.10,PB.6064.1,PB.1913.1,PB.7194.2,PB.5750.1,PB.6628.1,PB.4226.5,PB.2680.3,PB.6421.1,PB.3587.2,PB.1192.1,PB.3034.1,PB.402.7,PB.4023.70,PB.5303.1,PB.235.1,PB.4989.2,PB.1001.1,PB.1287.2,PB.3619.2,PB.1712.2,PB.1767.1,PB.…
biological_process	GO:0009987	cellular process	3675	PB.5087.1,PB.5930.1,PB.6667.1,PB.6744.2,PB.4147.3,PB.757.1,PB.5849.35,PB.876.2,PB.3753.4,PB.5852.4,PB.423.1,PB.6011.2,PB.1212.1,PB.3152.1,PB.2966.1,PB.2684.7,PB.4442.5,PB.4554.8,PB.4964.1,PB.4097.1,PB.3090.1,PB.6371.1,PB.1589.4,PB.850.32,PB.6917.4,PB.6605.2,PB.1879.7,PB.5799.2,PB.6412.1,PB.3551.1,PB.3083.1,PB.7060.1,PB.6175.5,PB.4933.1,PB.5649.7,PB.5119.1,PB.5757.4,PB.6027.3,PB.6162.1,PB.4709.4,P…
biological_process	GO:0022414	reproductive process	306	PB.2085.1,PB.3094.4,PB.2889.5,PB.4728.17,PB.3523.1,PB.64.4,PB.6843.2,PB.5702.3,PB.4850.1,PB.5769.2,PB.4728.23,PB.5072.1,PB.5911.1,PB.5702.16,PB.850.41,PB.4951.3,PB.4728.6,PB.3094.8,PB.867.3,PB.4728.7,PB.2687.2,PB.4012.1,PB.2753.1,PB.488.2,PB.4728.5,PB.6965.4,PB.2503.1,PB.2297.2,PB.7364.1,PB.6999.1,PB.6829.1,PB.6118.2,PB.4728.13,PB.6043.1,PB.6843.1,PB.5852.50,PB.4728.3,PB.3608.1,PB.2007.3,PB.875.1…
biological_process	GO:0022610	biological adhesion	265	PB.6175.20,PB.4438.3,PB.903.14,PB.7478.2,PB.3575.2,PB.5215.4,PB.7149.11,PB.5821.6,PB.7346.3,PB.5942.1,PB.7252.1,PB.4723.13,PB.4503.2,PB.6118.4,PB.5852.51,PB.6256.1,PB.4623.4,PB.3977.4,PB.3239.3,PB.4860.3,PB.5299.2,PB.5005.1,PB.7257.1,PB.2579.1,PB.5954.1,PB.1994.2,PB.4442.1,PB.488.3,PB.7149.4,PB.5866.1,PB.5769.22,PB.5119.3,PB.6785.1,PB.3484.3,PB.5852.47,PB.4576.2,PB.343.2,PB.7252.2,PB.5119.5,PB.34…
biological_process	GO:0023052	signaling	916	PB.7530.51,PB.4052.1,PB.2469.2,PB.7258.4,PB.6488.4,PB.693.1,PB.6321.2,PB.3543.2,PB.2119.2,PB.6507.2,PB.6060.2,PB.5702.11,PB.6435.1,PB.3239.2,PB.7346.2,PB.2899.2,PB.6245.2,PB.1000.3,PB.4195.1,PB.4600.1,PB.4980.2,PB.6856.1,PB.2586.1,PB.672.1,PB.5318.1,PB.1059.1,PB.201.1,PB.4032.1,PB.4475.3,PB.2908.1,PB.3598.1,PB.6328.1,PB.6386.1,PB.6565.1,PB.6359.2,PB.1013.2,PB.3921.1,PB.1461.6,PB.1994.6,PB.6878.4,…
biological_process	GO:0032501	multicellular organismal process	1316	PB.2392.5,PB.7040.1,PB.1863.7,PB.6989.1,PB.709.2,PB.6393.4,PB.2123.1,PB.167.2,PB.3523.4,PB.6860.7,PB.2595.1,PB.1524.1,PB.4915.2,PB.5648.3,PB.3600.4,PB.1661.1,PB.1730.2,PB.615.6,PB.89.2,PB.5769.24,PB.4023.68,PB.3388.3,PB.2684.2,PB.4335.1,PB.6366.1,PB.6324.1,PB.5852.52,PB.850.37,PB.4507.17,PB.7154.1,PB.4628.2,PB.4785.2,PB.2830.1,PB.5497.1,PB.4527.1,PB.4507.16,PB.6268.1,PB.4564.1,PB.4454.1,PB.5079.1…
biological_process	GO:0032502	developmental process	1252	PB.5452.1,PB.2345.1,PB.2910.4,PB.6522.1,PB.4719.2,PB.4933.3,PB.2035.1,PB.4321.3,PB.5852.51,PB.4728.25,PB.2388.2,PB.4507.3,PB.4576.2,PB.3562.3,PB.2716.1,PB.6785.1,PB.1883.2,PB.5750.1,PB.3469.1,PB.6628.1,PB.5119.3,PB.5024.1,PB.850.5,PB.2895.2,PB.488.3,PB.3575.2,PB.7478.2,PB.3181.1,PB.6128.2,PB.7261.1,PB.3349.2,PB.1831.1,PB.6780.1,PB.4023.70,PB.6175.20,PB.4261.1,PB.4507.19,PB.2340.1,PB.4723.13,PB.28…
biological_process	GO:0040007	growth	110	PB.6175.20,PB.4772.1,PB.1448.1,PB.4515.2,PB.4023.6,PB.5928.1,PB.64.3,PB.2047.2,PB.385.3,PB.4564.1,PB.7346.3,PB.249.1,PB.2340.1,PB.7346.1,PB.4471.2,PB.2862.1,PB.6081.1,PB.5770.1,PB.2824.1,PB.6175.5,PB.2908.1,PB.4321.3,PB.6522.1,PB.4321.1,PB.271.12,PB.2144.2,PB.6957.1,PB.5769.22,PB.271.2,PB.6628.1,PB.6628.3,PB.2536.4,PB.4458.1,PB.2862.2,PB.4471.1,PB.7346.2,PB.709.1,PB.3523.4,PB.3691.4,PB.385.8,PB.2…
biological_process	GO:0040011	locomotion	282	PB.5732.1,PB.4306.10,PB.4009.1,PB.5769.17,PB.5187.3,PB.2297.6,PB.2297.7,PB.2810.1,PB.4542.1,PB.2334.1,PB.3494.2,PB.3691.3,PB.6.7,PB.2430.1,PB.4306.1,PB.1617.1,PB.2572.3,PB.5769.23,PB.5852.44,PB.1334.2,PB.3984.2,PB.1237.5,PB.6118.5,PB.6512.3,PB.6563.1,PB.5852.28,PB.1150.2,PB.3092.3,PB.1214.1,PB.3159.2,PB.2753.3,PB.2321.2,PB.3256.2,PB.4251.1,PB.2605.1,PB.5405.1,PB.1386.1,PB.6118.19,PB.3439.1,PB.741…
biological_process	GO:0044699	single-organism process	3264	PB.6114.1,PB.1387.1,PB.2506.2,PB.3347.6,PB.366.1,PB.271.3,PB.4176.1,PB.850.9,PB.3265.1,PB.5412.2,PB.593.2,PB.6464.1,PB.4728.20,PB.3398.1,PB.6563.1,PB.3128.1,PB.1010.2,PB.5337.4,PB.2430.1,PB.5272.2,PB.3473.4,PB.6804.2,PB.1560.1,PB.5187.3,PB.6809.1,PB.4282.5,PB.2297.7,PB.3600.3,PB.1506.2,PB.2455.1,PB.2864.3,PB.4158.4,PB.7525.1,PB.3965.2,PB.5667.2,PB.6118.3,PB.297.12,PB.6433.1,PB.6653.2,PB.7004.1,PB…
biological_process	GO:0044848	biological phase	2	PB.2716.2,PB.2716.1
biological_process	GO:0048511	rhythmic process	88	PB.7250.1,PB.3523.7,PB.7428.4,PB.1736.1,PB.6393.6,PB.6393.7,PB.4728.19,PB.4728.16,PB.3523.5,PB.1178.2,PB.6393.5,PB.647.4,PB.16.2,PB.6381.2,PB.1264.1,PB.4728.13,PB.3439.1,PB.4728.10,PB.385.13,PB.4728.1,PB.16.6,PB.4728.3,PB.6393.2,PB.3013.4,PB.647.2,PB.1443.1,PB.6381.3,PB.6381.1,PB.4728.6,PB.4728.7,PB.1178.1,PB.4728.18,PB.4728.5,PB.5092.1,PB.6829.1,PB.385.4,PB.5658.1,PB.1443.2,PB.4728.9,PB.4728.17,…
biological_process	GO:0050896	response to stimulus	1648	PB.3783.3,PB.3074.13,PB.5852.25,PB.1013.3,PB.4032.5,PB.3074.3,PB.2566.2,PB.3562.7,PB.4454.2,PB.5902.4,PB.3966.1,PB.2916.7,PB.6268.2,PB.4634.1,PB.511.5,PB.5724.1,PB.998.1,PB.3205.1,PB.5074.1,PB.4459.1,PB.7139.1,PB.7297.2,PB.4207.1,PB.6740.2,PB.7131.3,PB.1461.1,PB.1461.10,PB.1774.1,PB.1024.1,PB.3713.1,PB.1348.1,PB.2123.2,PB.1512.1,PB.716.1,PB.4052.5,PB.1070.3,PB.4654.1,PB.1242.2,PB.5196.2,PB.4195.5…
biological_process	GO:0051179	localization	1363	PB.2713.2,PB.6624.2,PB.3947.1,PB.3484.1,PB.29.3,PB.4953.2,PB.5652.3,PB.7227.18,PB.4442.3,PB.1550.3,PB.5669.1,PB.86.1,PB.5005.3,PB.7257.3,PB.506.1,PB.5484.3,PB.917.2,PB.7214.1,PB.2578.1,PB.6860.1,PB.3432.2,PB.1571.2,PB.366.3,PB.2603.1,PB.565.1,PB.2295.1,PB.1046.1,PB.1615.6,PB.5583.3,PB.2721.1,PB.2882.2,PB.1008.3,PB.3457.1,PB.6166.1,PB.6057.2,PB.4007.1,PB.3316.4,PB.176.1,PB.2758.6,PB.1615.5,PB.2882…
biological_process	GO:0051704	multi-organism process	516	PB.4475.2,PB.4728.15,PB.1173.1,PB.1894.5,PB.5821.3,PB.850.44,PB.6027.2,PB.5067.2,PB.1590.2,PB.7329.2,PB.7324.1,PB.2716.2,PB.994.1,PB.7131.3,PB.1122.3,PB.4236.1,PB.217.2,PB.64.2,PB.6628.2,PB.332.1,PB.3767.3,PB.4507.5,PB.7261.2,PB.4515.3,PB.647.3,PB.850.3,PB.4459.1,PB.3009.1,PB.5724.1,PB.1043.1,PB.4288.3,PB.6268.2,PB.343.2,PB.3894.1,PB.2862.2,PB.7470.2,PB.5497.2,PB.2817.1,PB.4454.2,PB.4159.1,PB.867…
biological_process	GO:0065007	biological regulation	2957	PB.7230.2,PB.6680.1,PB.7469.1,PB.154.6,PB.4562.3,PB.6754.1,PB.7208.1,PB.2976.1,PB.2910.3,PB.4321.4,PB.6579.3,PB.5914.1,PB.4507.4,PB.6870.2,PB.4742.1,PB.756.1,PB.1057.1,PB.3446.1,PB.2897.2,PB.850.10,PB.3984.1,PB.3597.5,PB.6798.7,PB.482.5,PB.6677.1,PB.5339.1,PB.5227.2,PB.1770.4,PB.1675.3,PB.7087.1,PB.2973.3,PB.4279.1,PB.3852.3,PB.3531.4,PB.1100.1,PB.1985.1,PB.2495.2,PB.681.1,PB.6001.3,PB.4708.6,PB.…
biological_process	GO:0071840	cellular component organization or biogenesis	1514	PB.917.1,PB.224.1,PB.6544.2,PB.5739.1,PB.1122.2,PB.4475.3,PB.1991.1,PB.4023.69,PB.1133.1,PB.1974.2,PB.367.1,PB.886.1,PB.4594.21,PB.4527.3,PB.5497.3,PB.6359.2,PB.5448.2,PB.3673.2,PB.6927.2,PB.6761.1,PB.3160.1,PB.3644.1,PB.6007.1,PB.5361.2,PB.7466.1,PB.6060.2,PB.4985.2,PB.4306.14,PB.2298.1,PB.7530.51,PB.1645.1,PB.6884.1,PB.4951.4,PB.4335.3,PB.1054.2,PB.7346.2,PB.5852.22,PB.2168.3,PB.3816.1,PB.5685.…
biological_process	GO:0098743	cell aggregation	4	PB.3523.5,PB.3523.7,PB.3523.4,PB.3523.1
biological_process	GO:0098754	detoxification	18	PB.5201.1,PB.6162.1,PB.2807.1,PB.1366.1,PB.3068.1,PB.6965.1,PB.2422.6,PB.2422.1,PB.3111.1,PB.6965.3,PB.2280.1,PB.93.1,PB.6965.2,PB.2422.5,PB.115.1,PB.3713.1,PB.2422.4,PB.6965.4
biological_process	GO:0099531	presynaptic process involved in synaptic transmission	13	PB.4950.1,PB.115.1,PB.4845.1,PB.1641.1,PB.4686.4,PB.3701.1,PB.3432.2,PB.5175.2,PB.5175.1,PB.346.3,PB.3432.1,PB.2261.1,PB.5866.1
